# Supplementary material for: Rhodium-catalyzed regioselective opening of vinyl epoxides with Et3N·3HF reagent – formation of allylic fluorohydrins
Source: Royal Society of Chemistry journal article supplement (doi:10.1039/c3sc51949j), 2013-10-03

# Rhodium-Catalyzed Regioselective Opening of Vinyl Epoxides with Et<sub>3</sub>N·3HF Reagent - Formation of Allylic Fluorohydrins

Qi Zhang, Hien M. Nguyen\*

Department of Chemistry, University of Iowa, Iowa City, IA 52242

**NMR SPECTRAL DATA FILE**

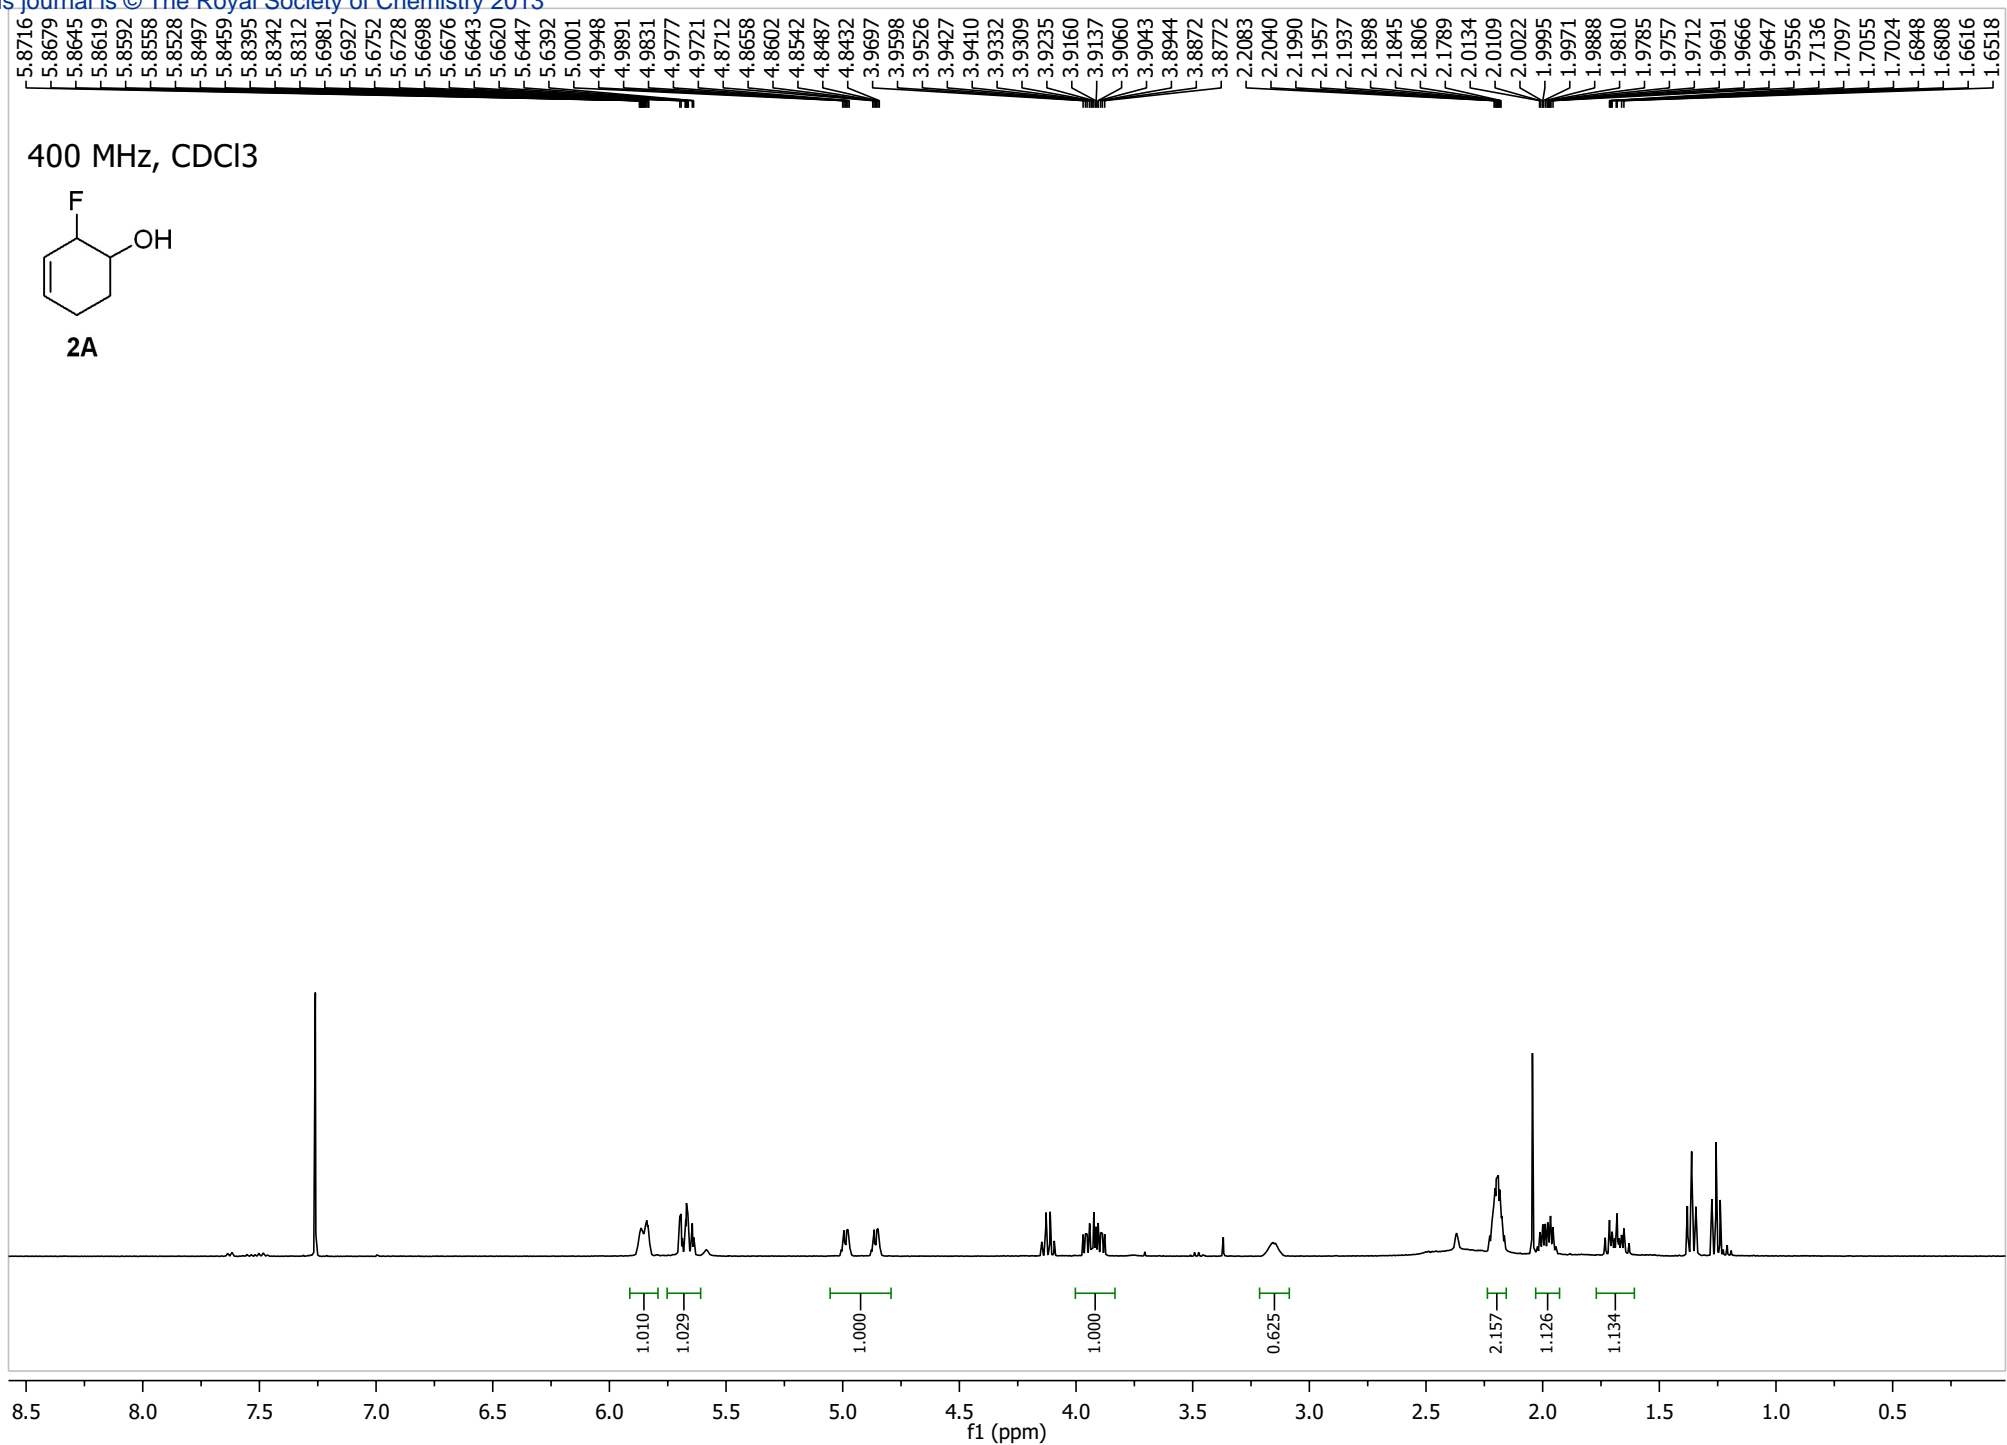

CDCl<sub>3</sub>, 101 MHz

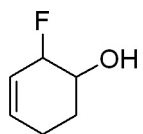

2A

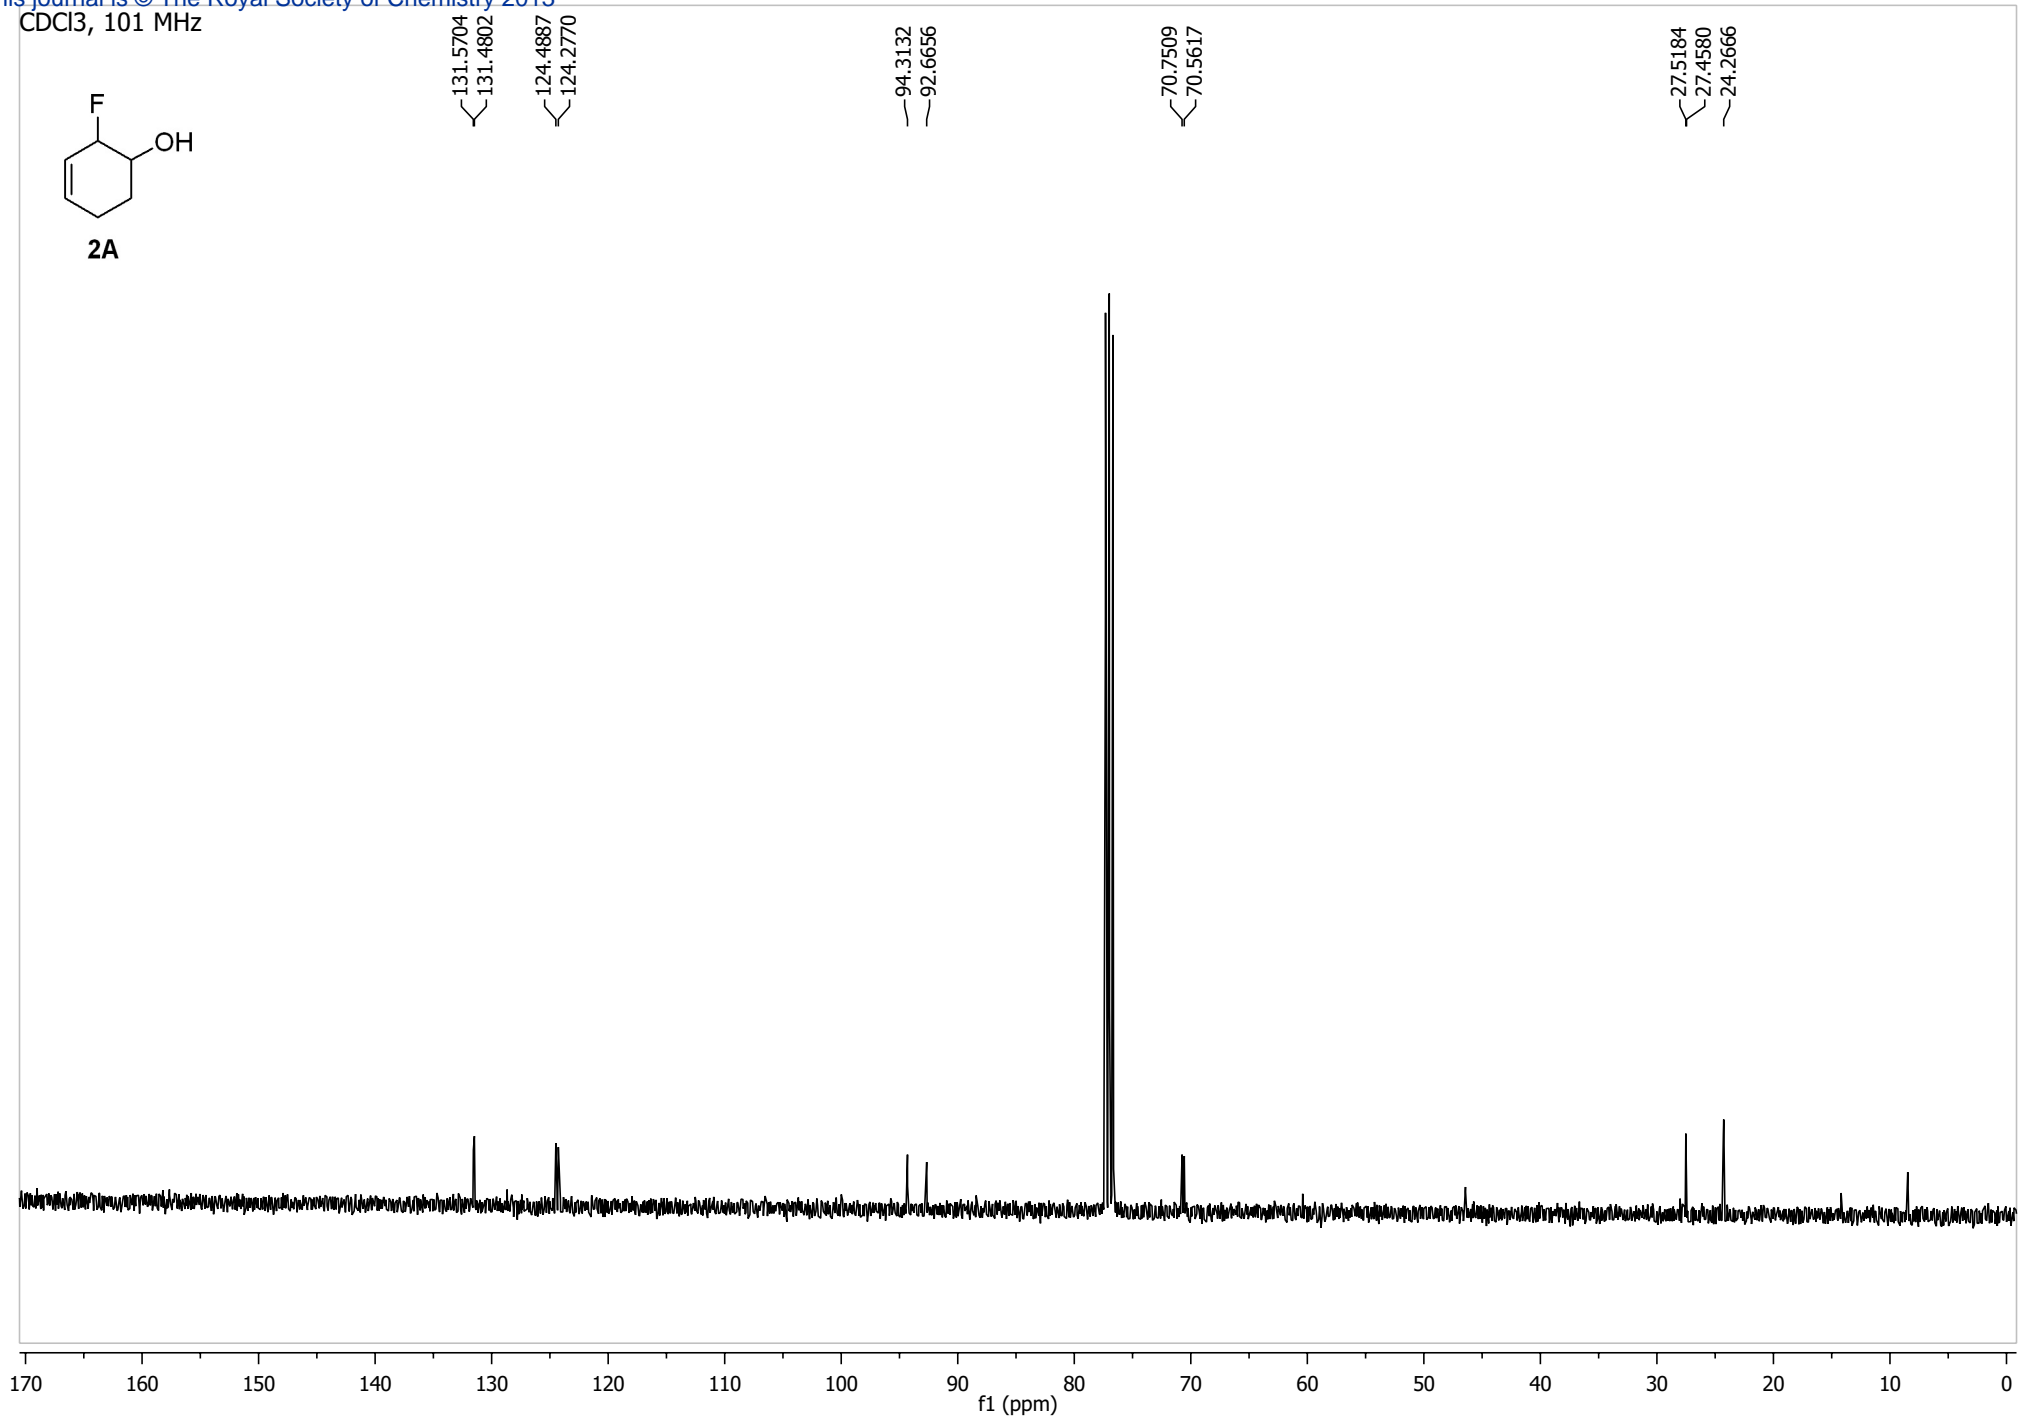

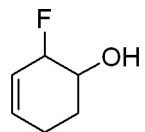

2A

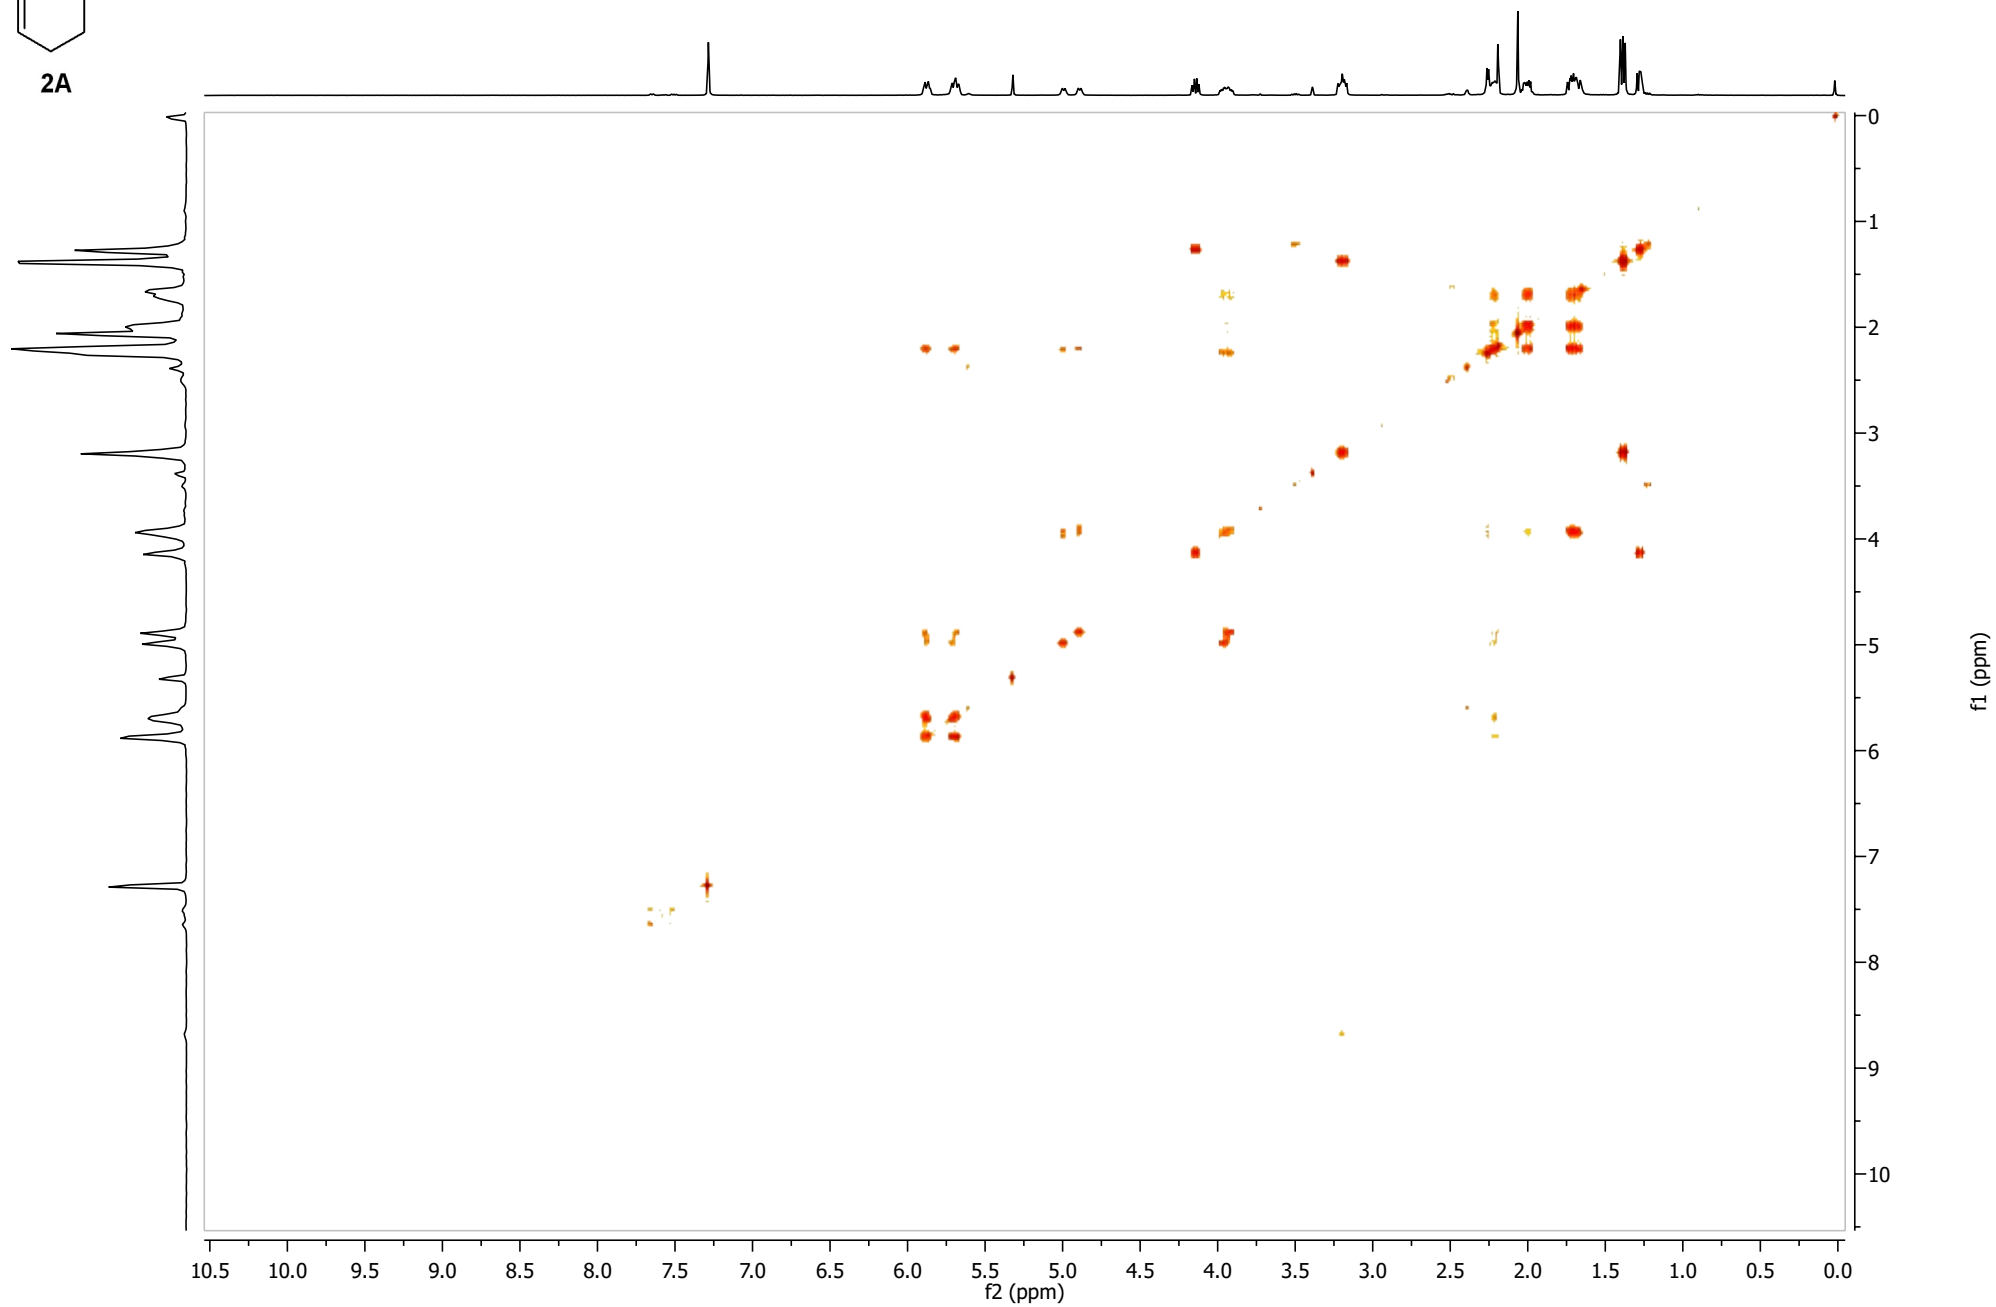

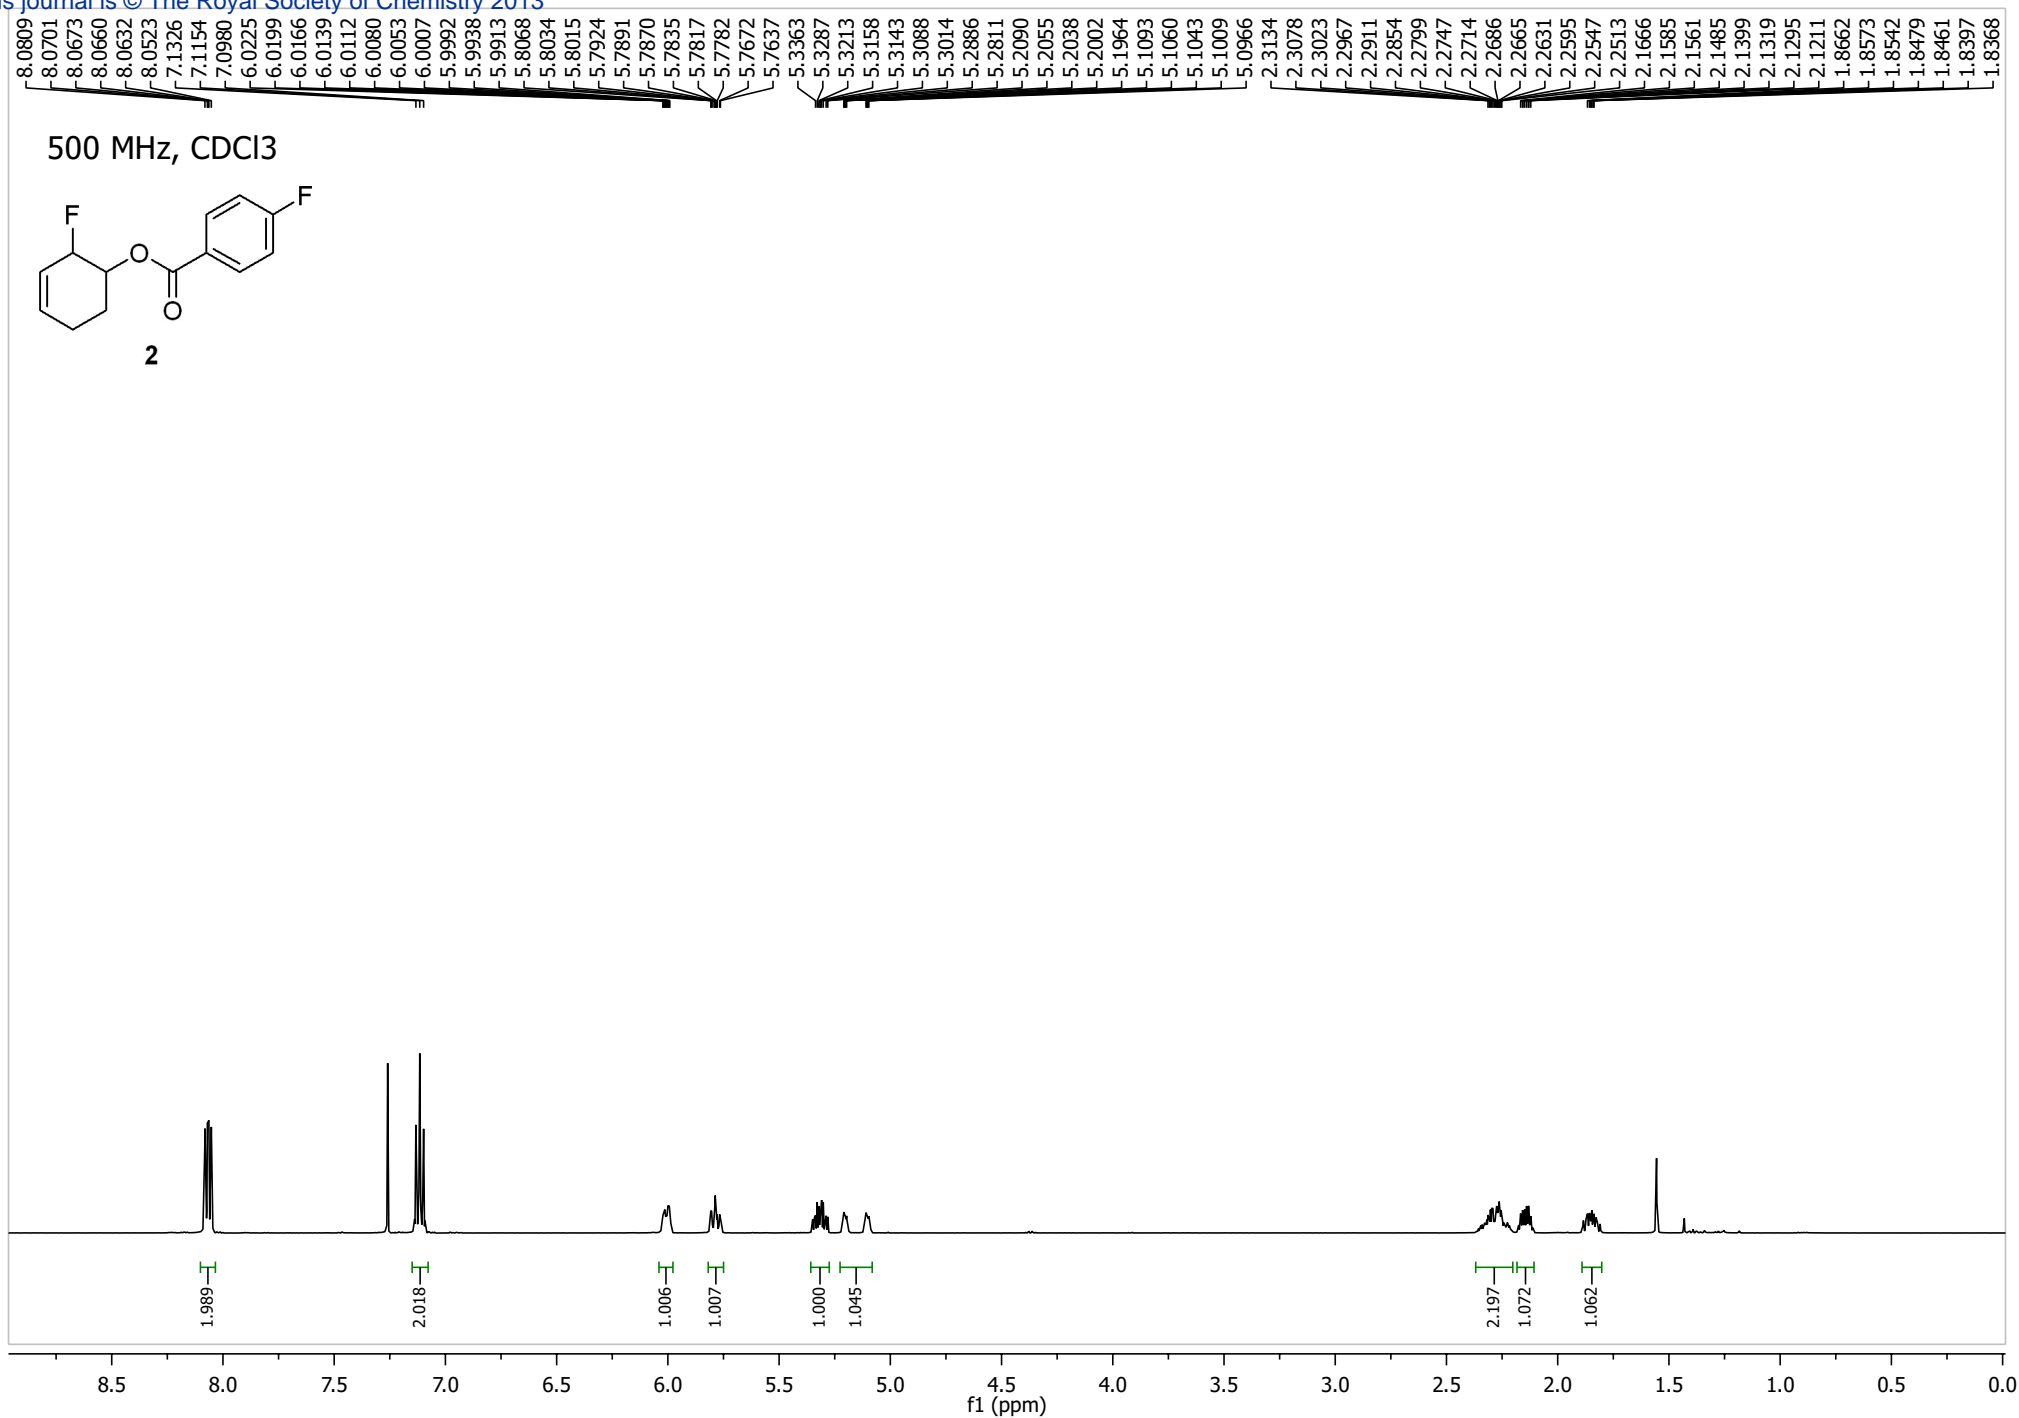

CDCl<sub>3</sub>, 126 MHz

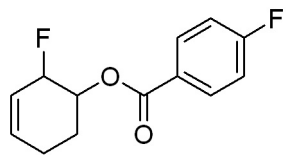

2

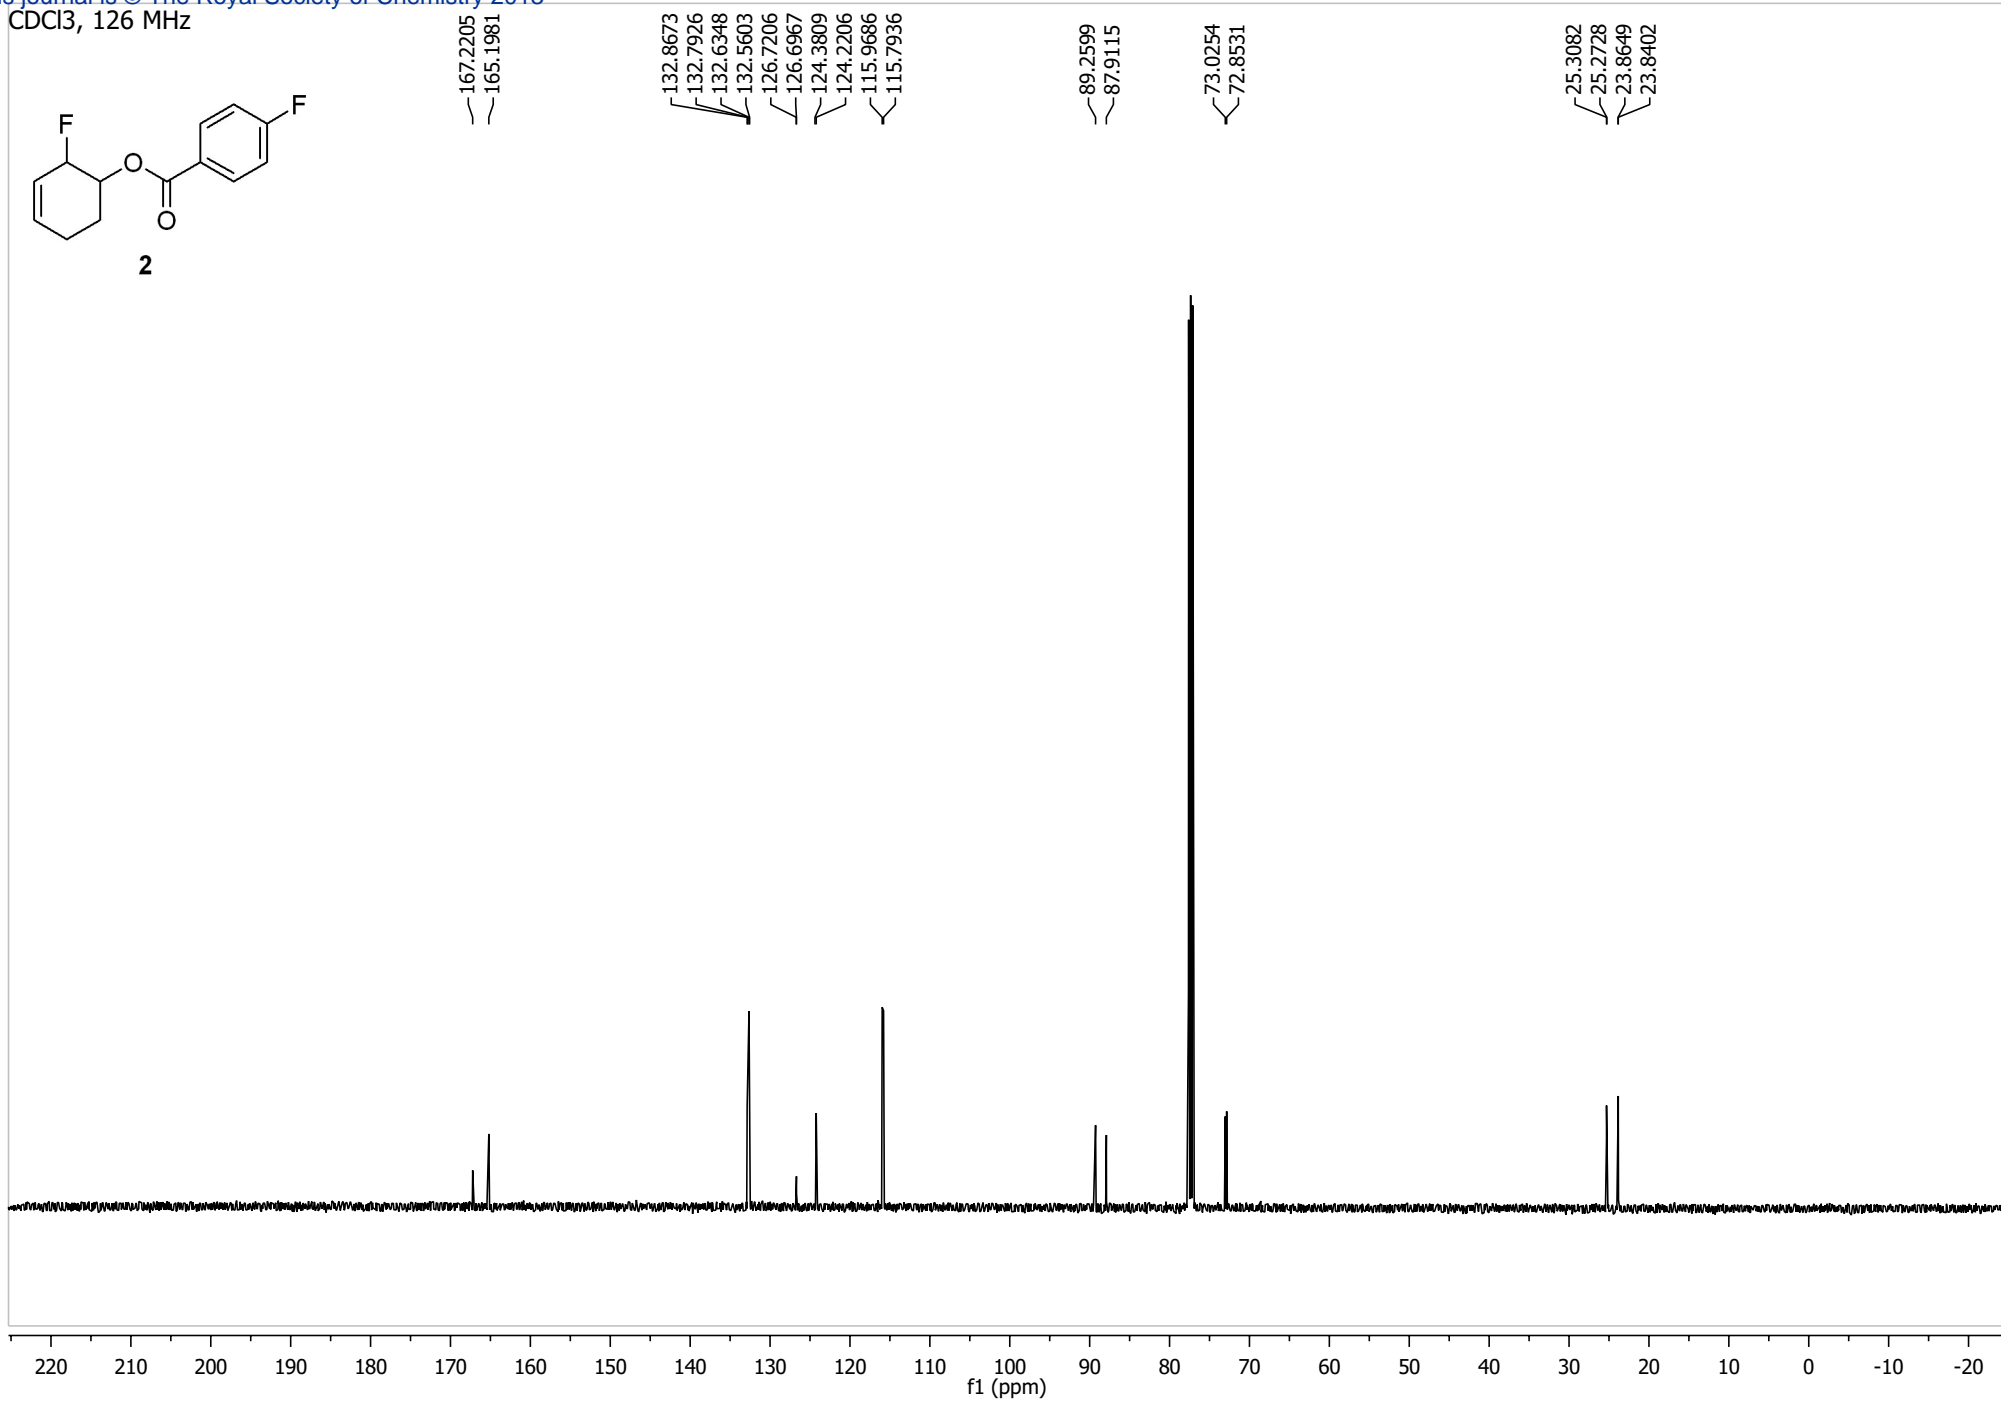

CDCl<sub>3</sub>, 471 MHz

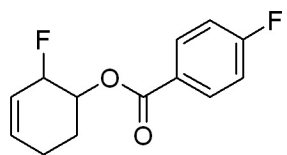

**2**

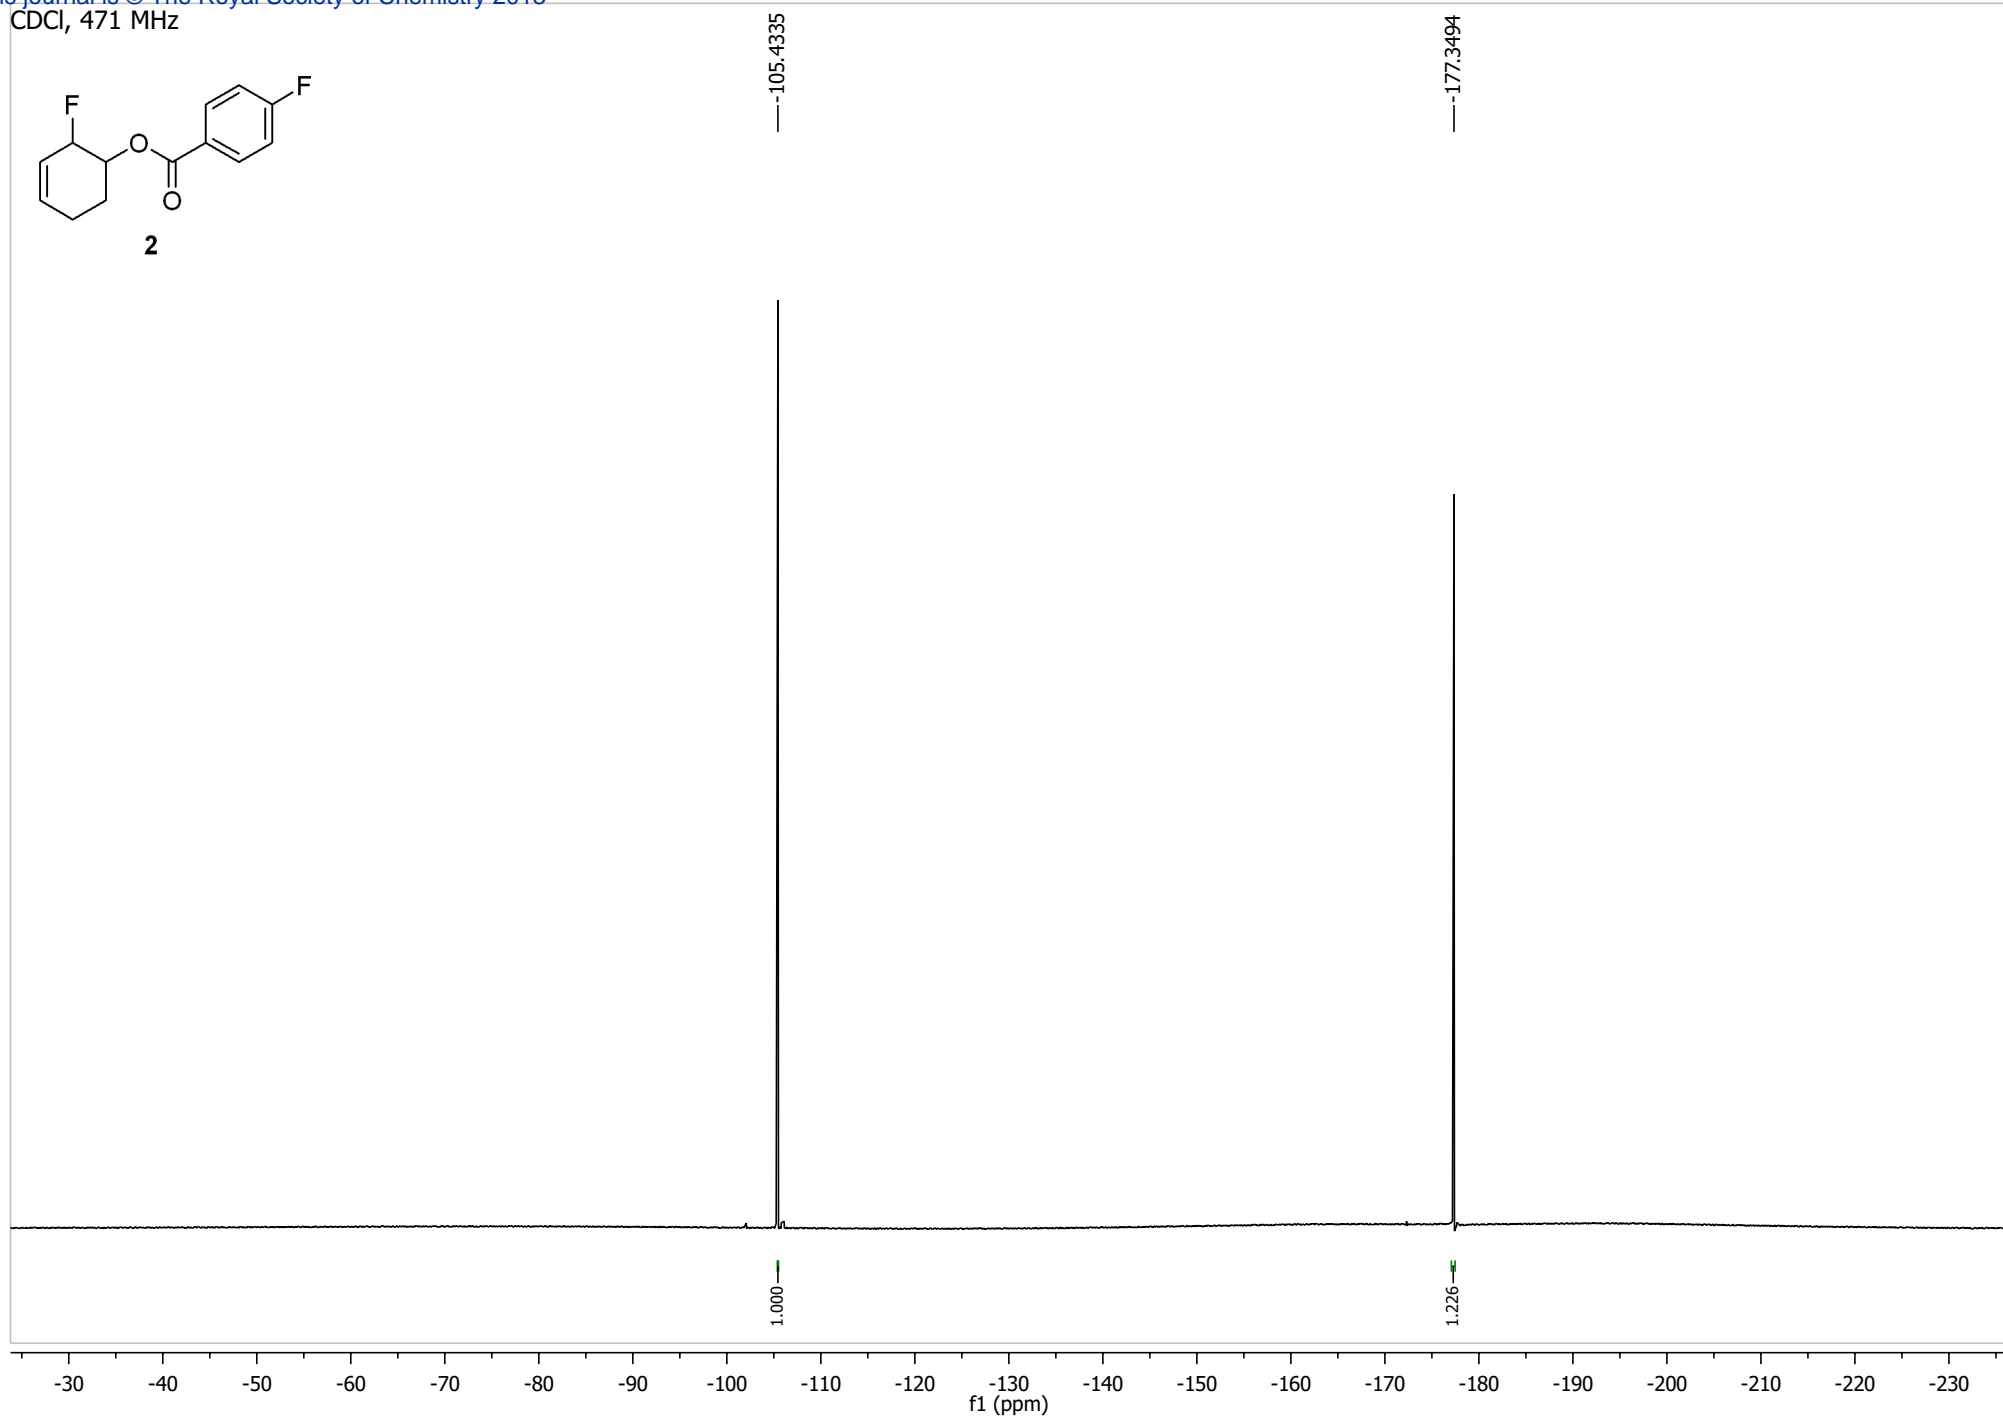

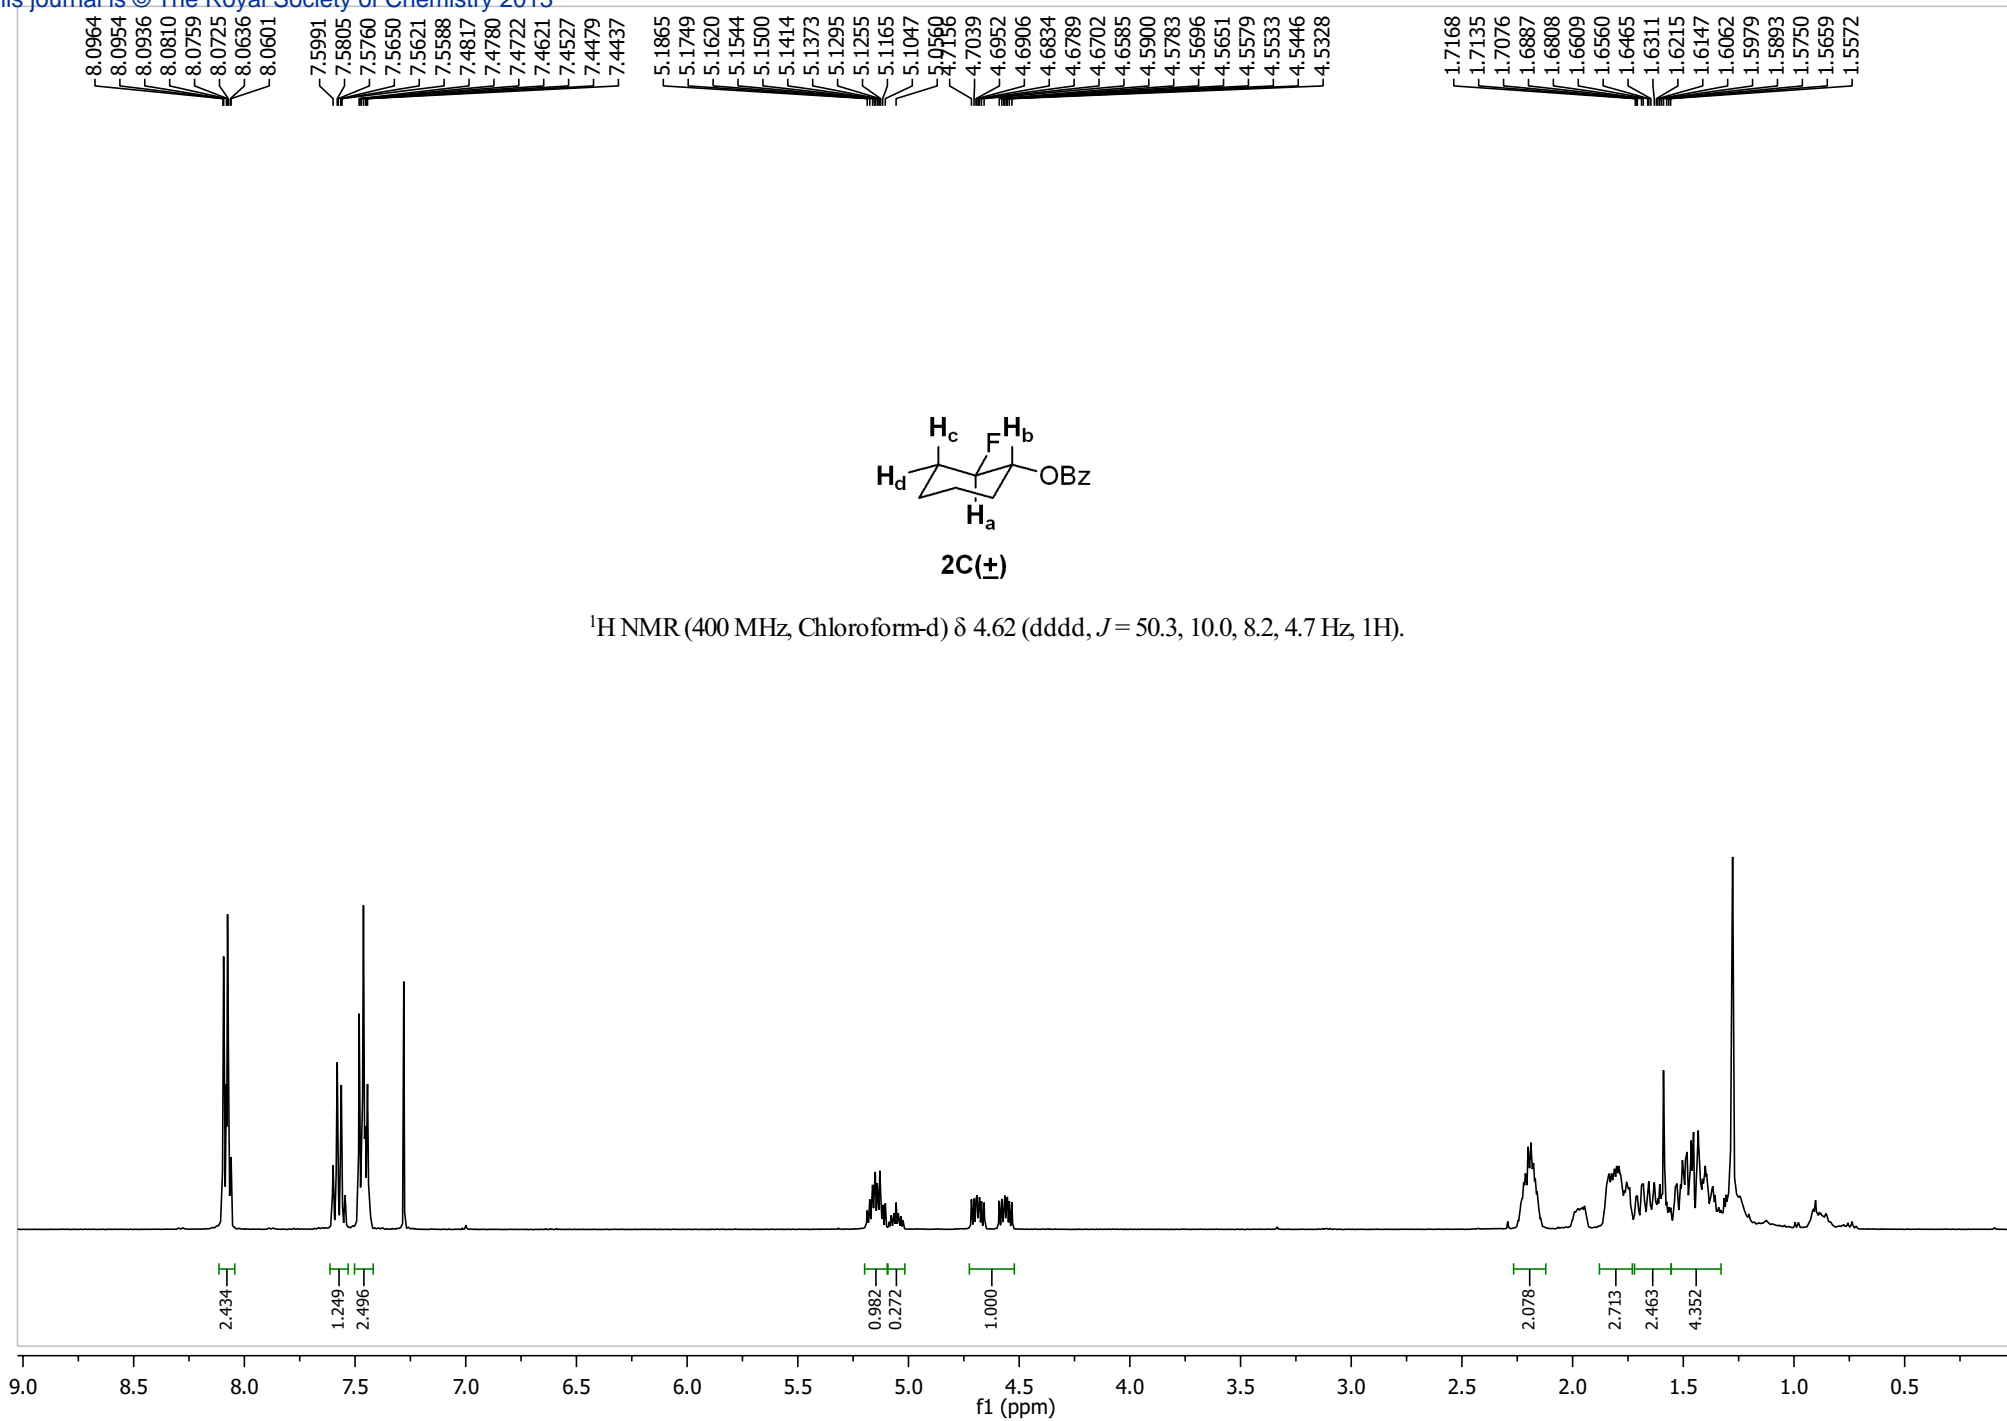



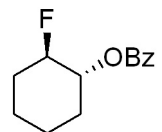

2C(±)

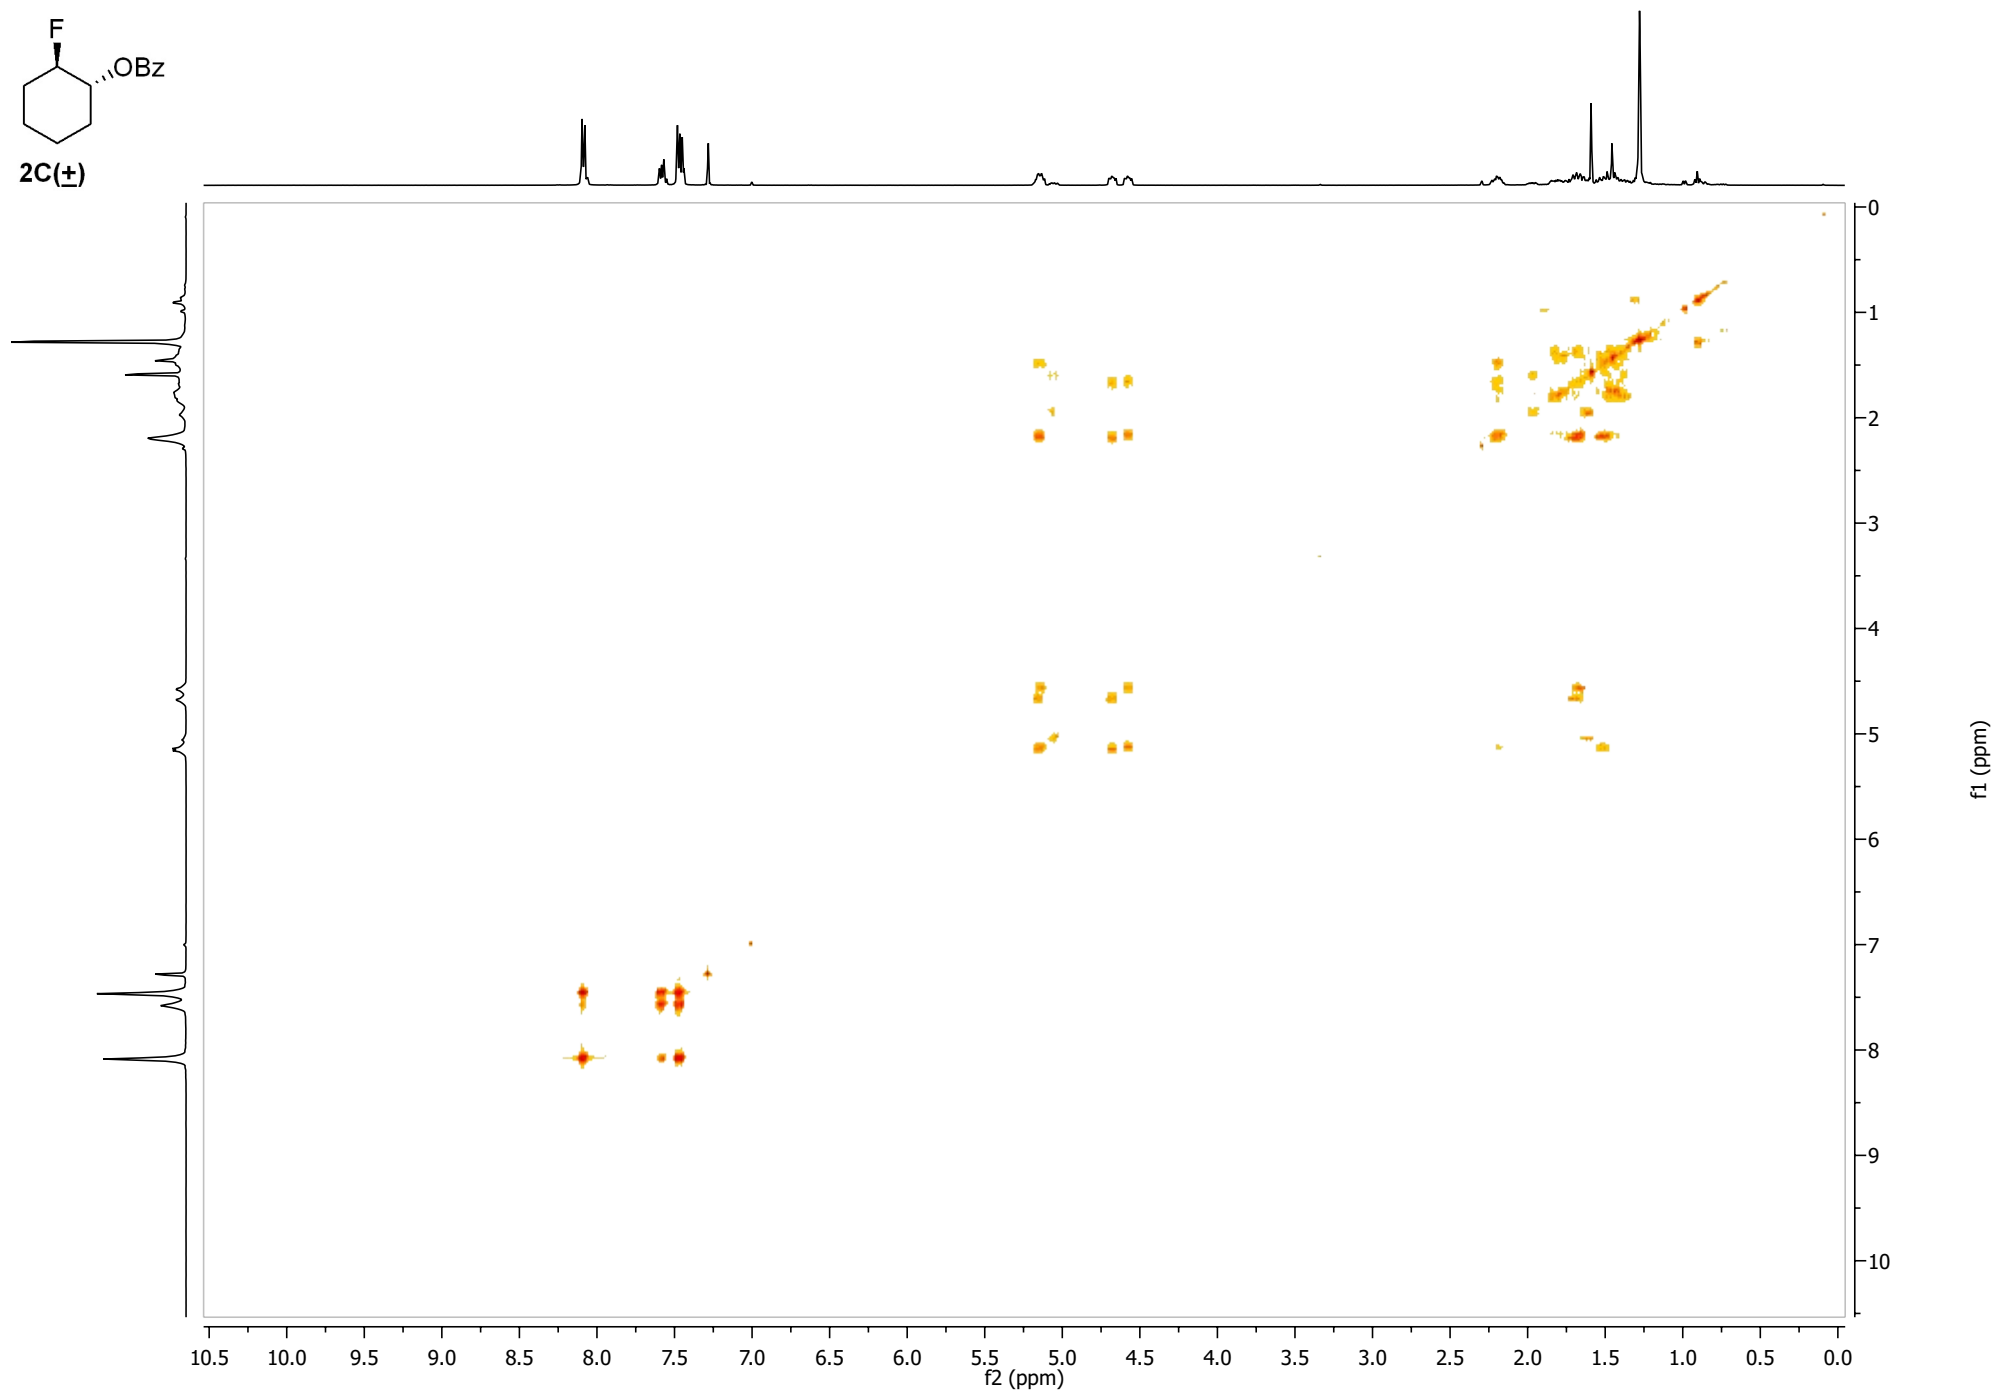

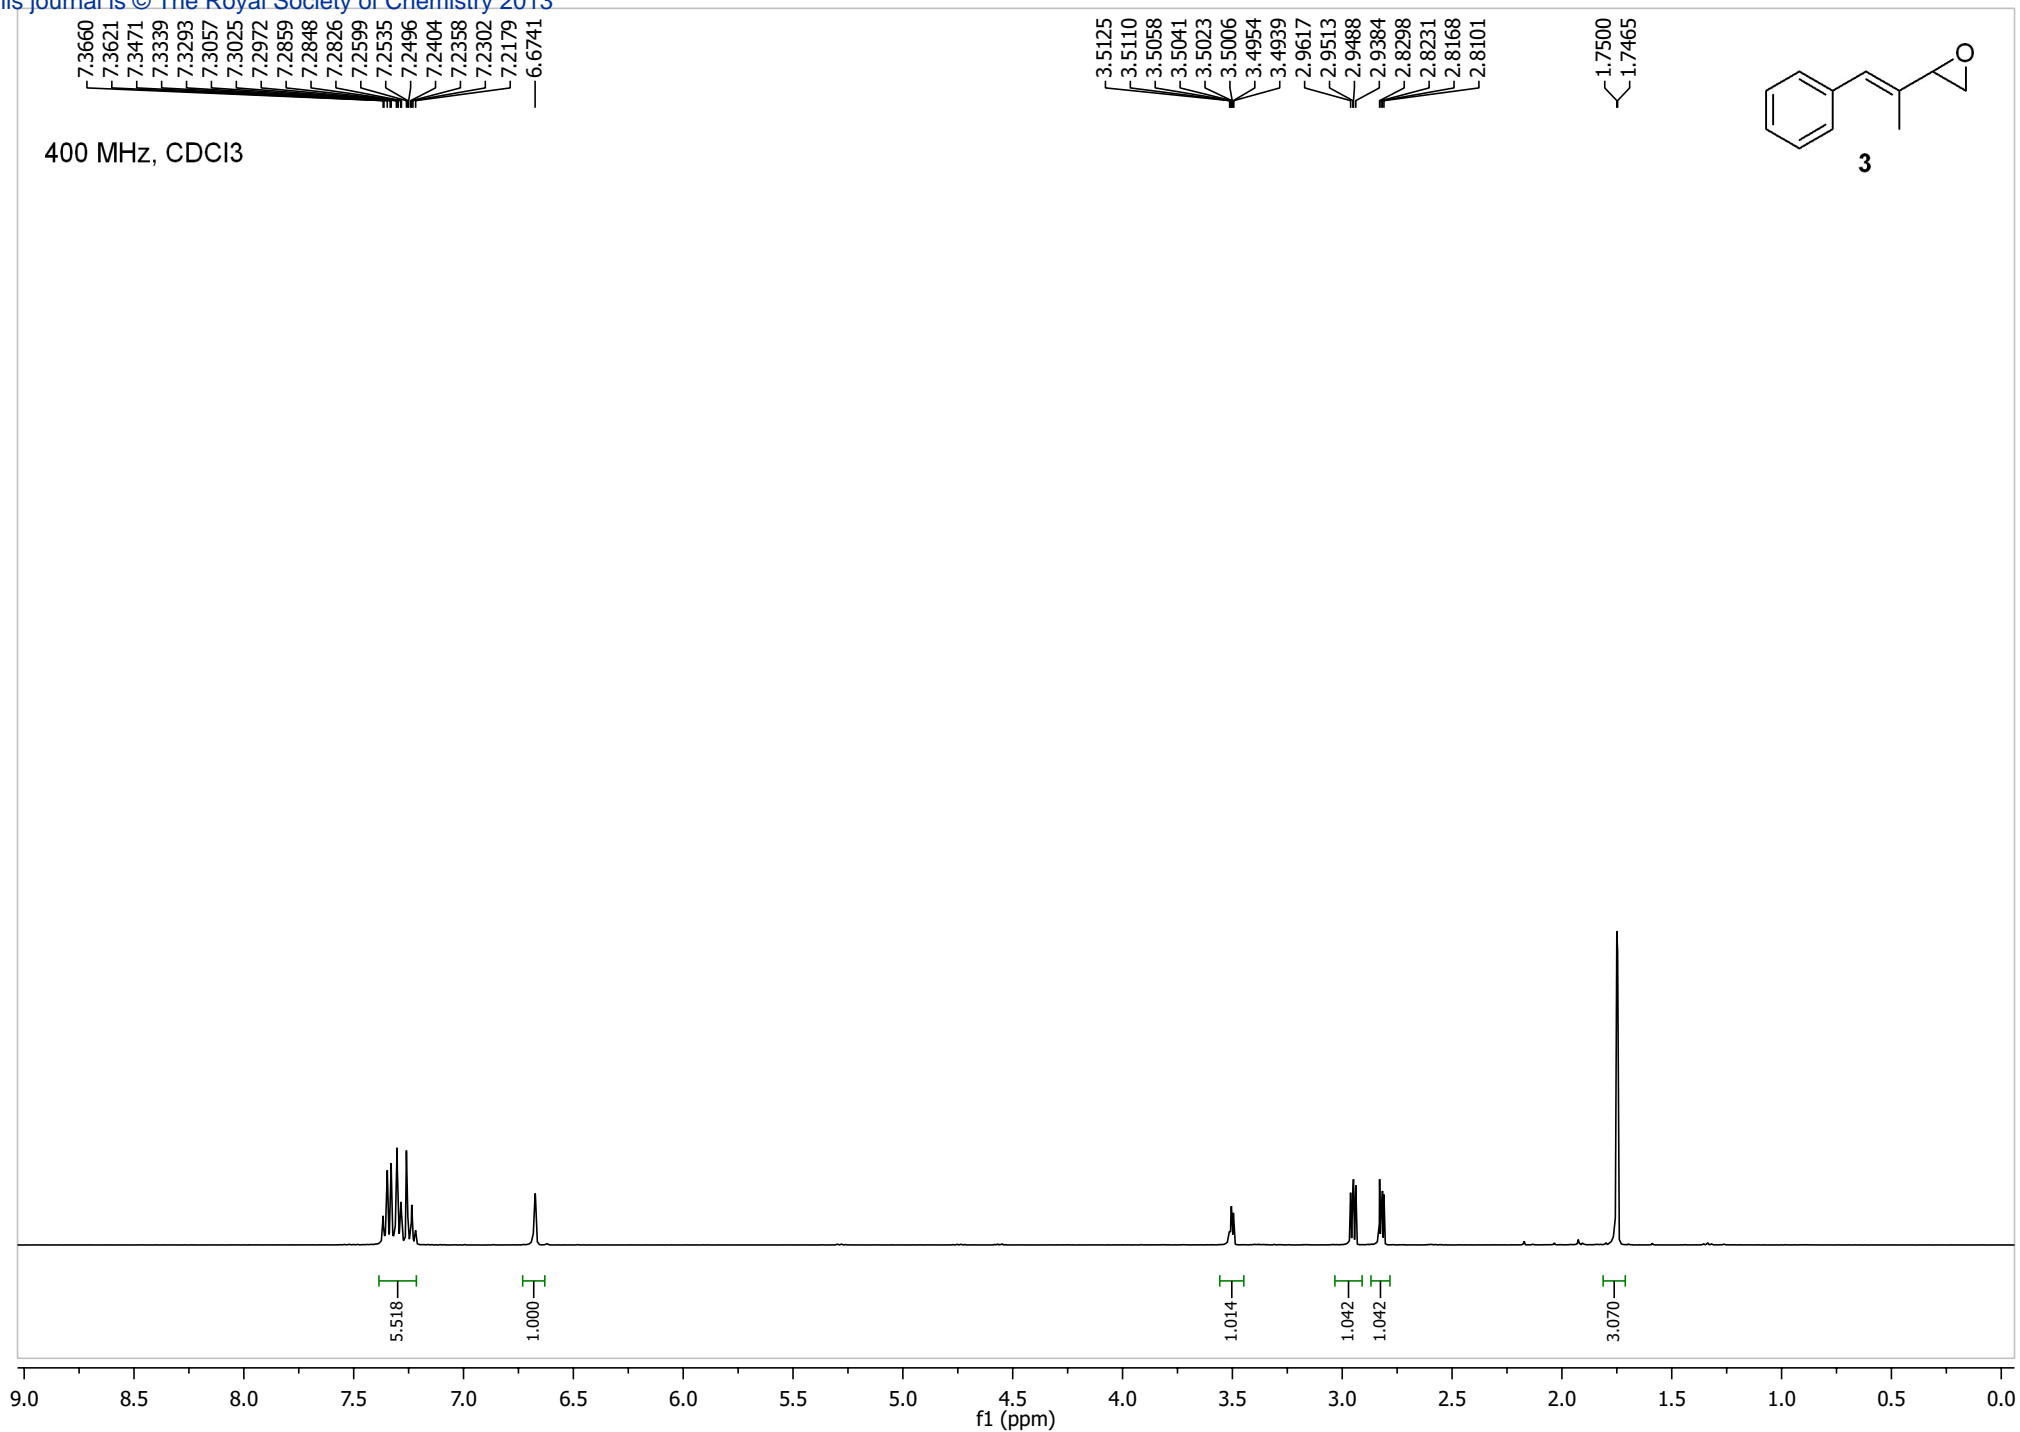

CDCl<sub>3</sub>, 126 HMz

— 137.2287  
— 134.2146  
— 129.0486  
— 128.9198  
— 128.3339  
— 126.8869

— 56.2816

— 46.9892

— 11.9711

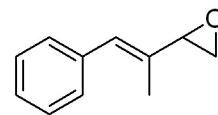

**3**

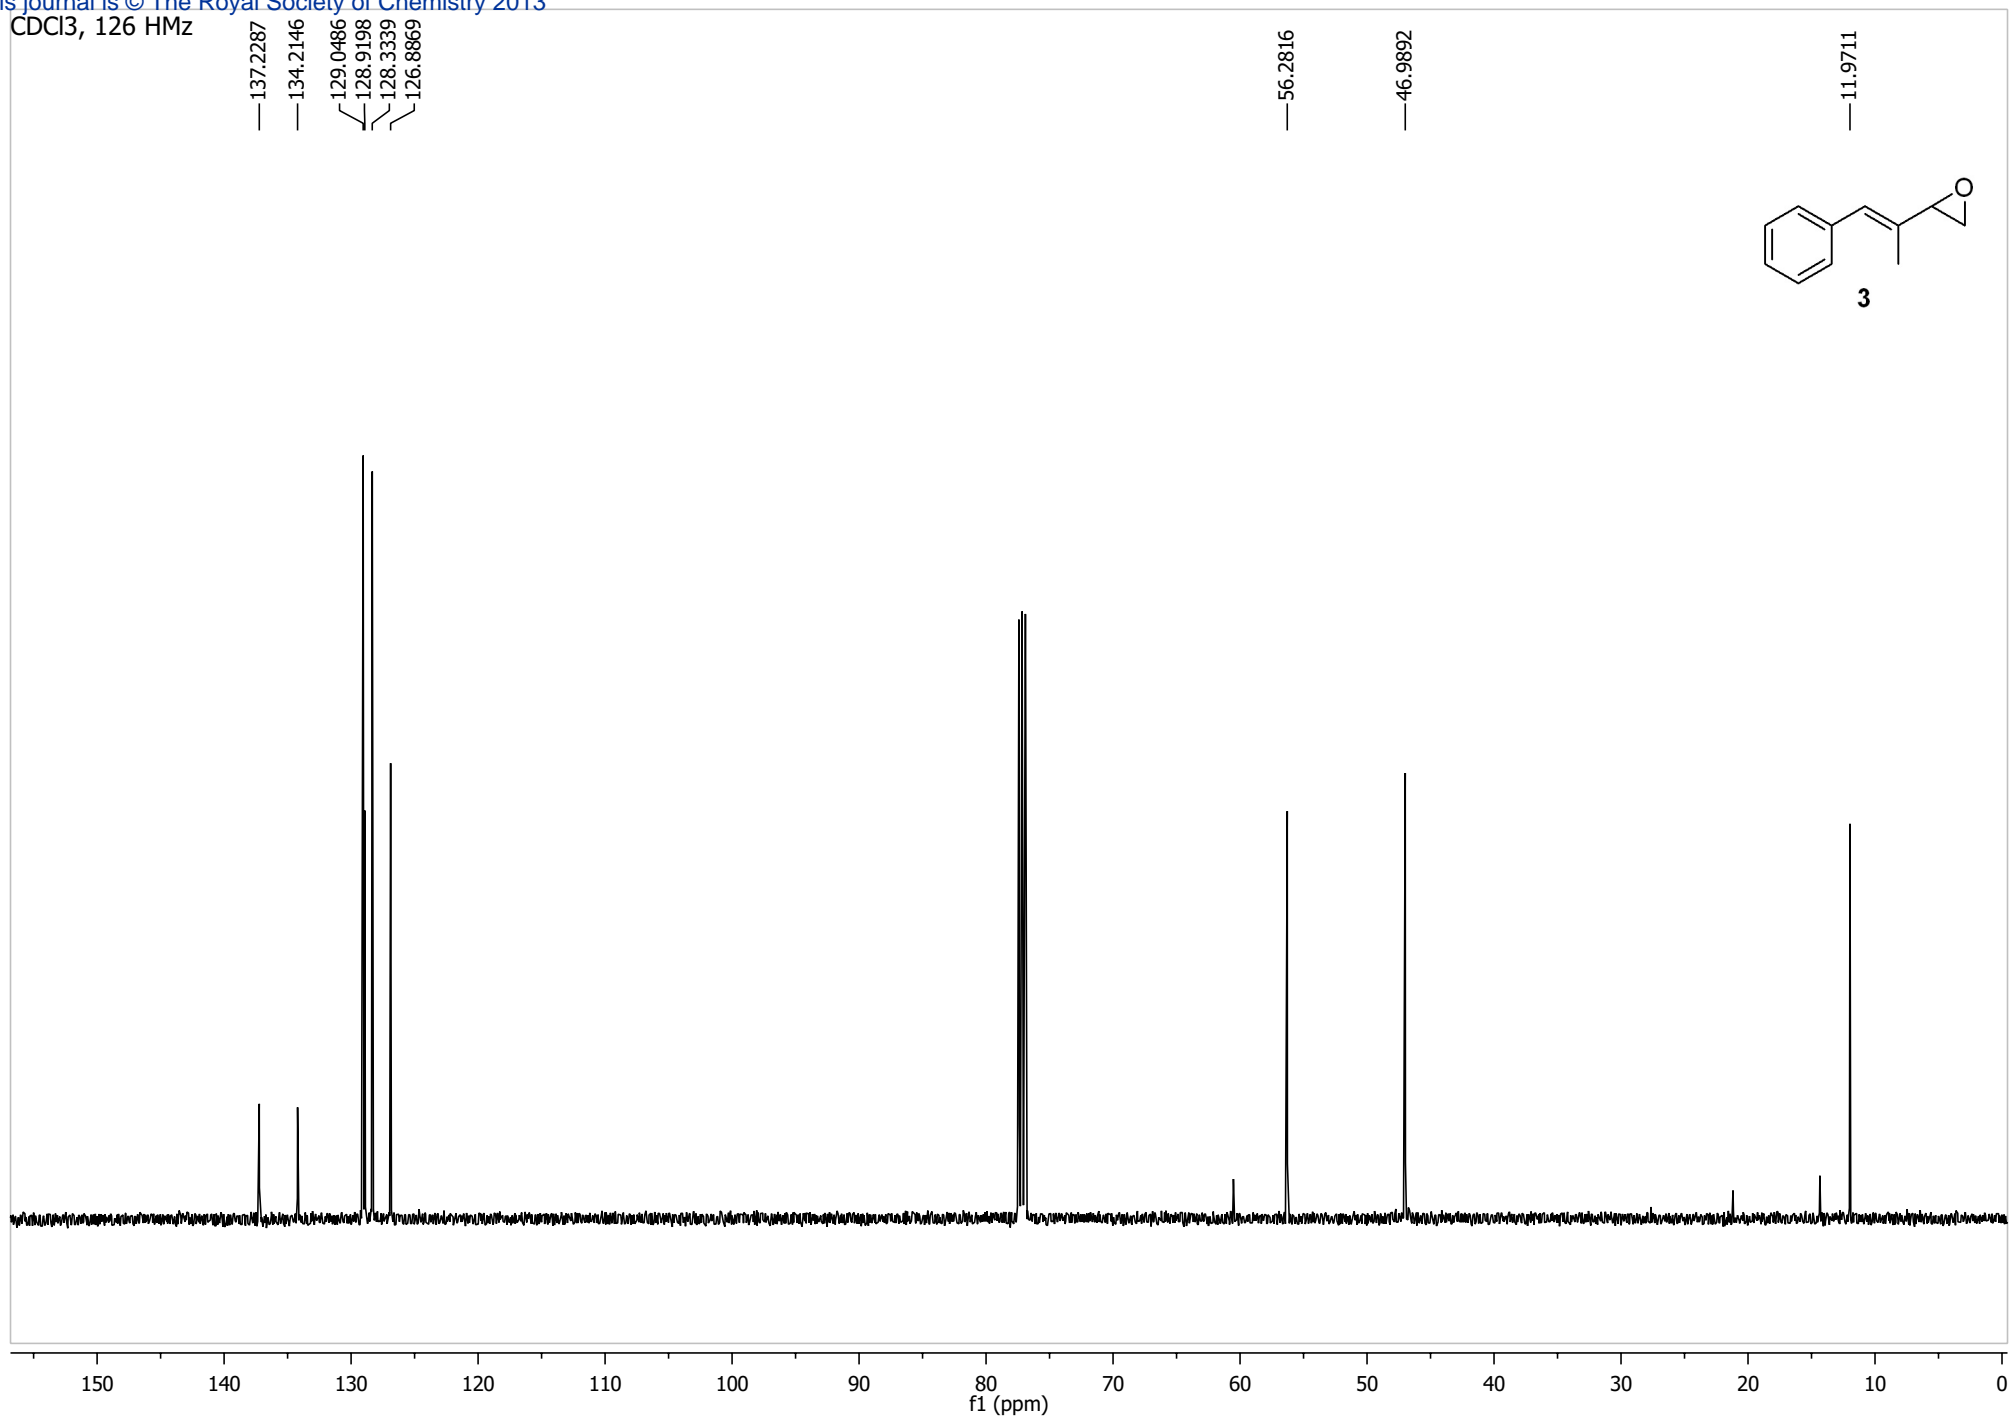

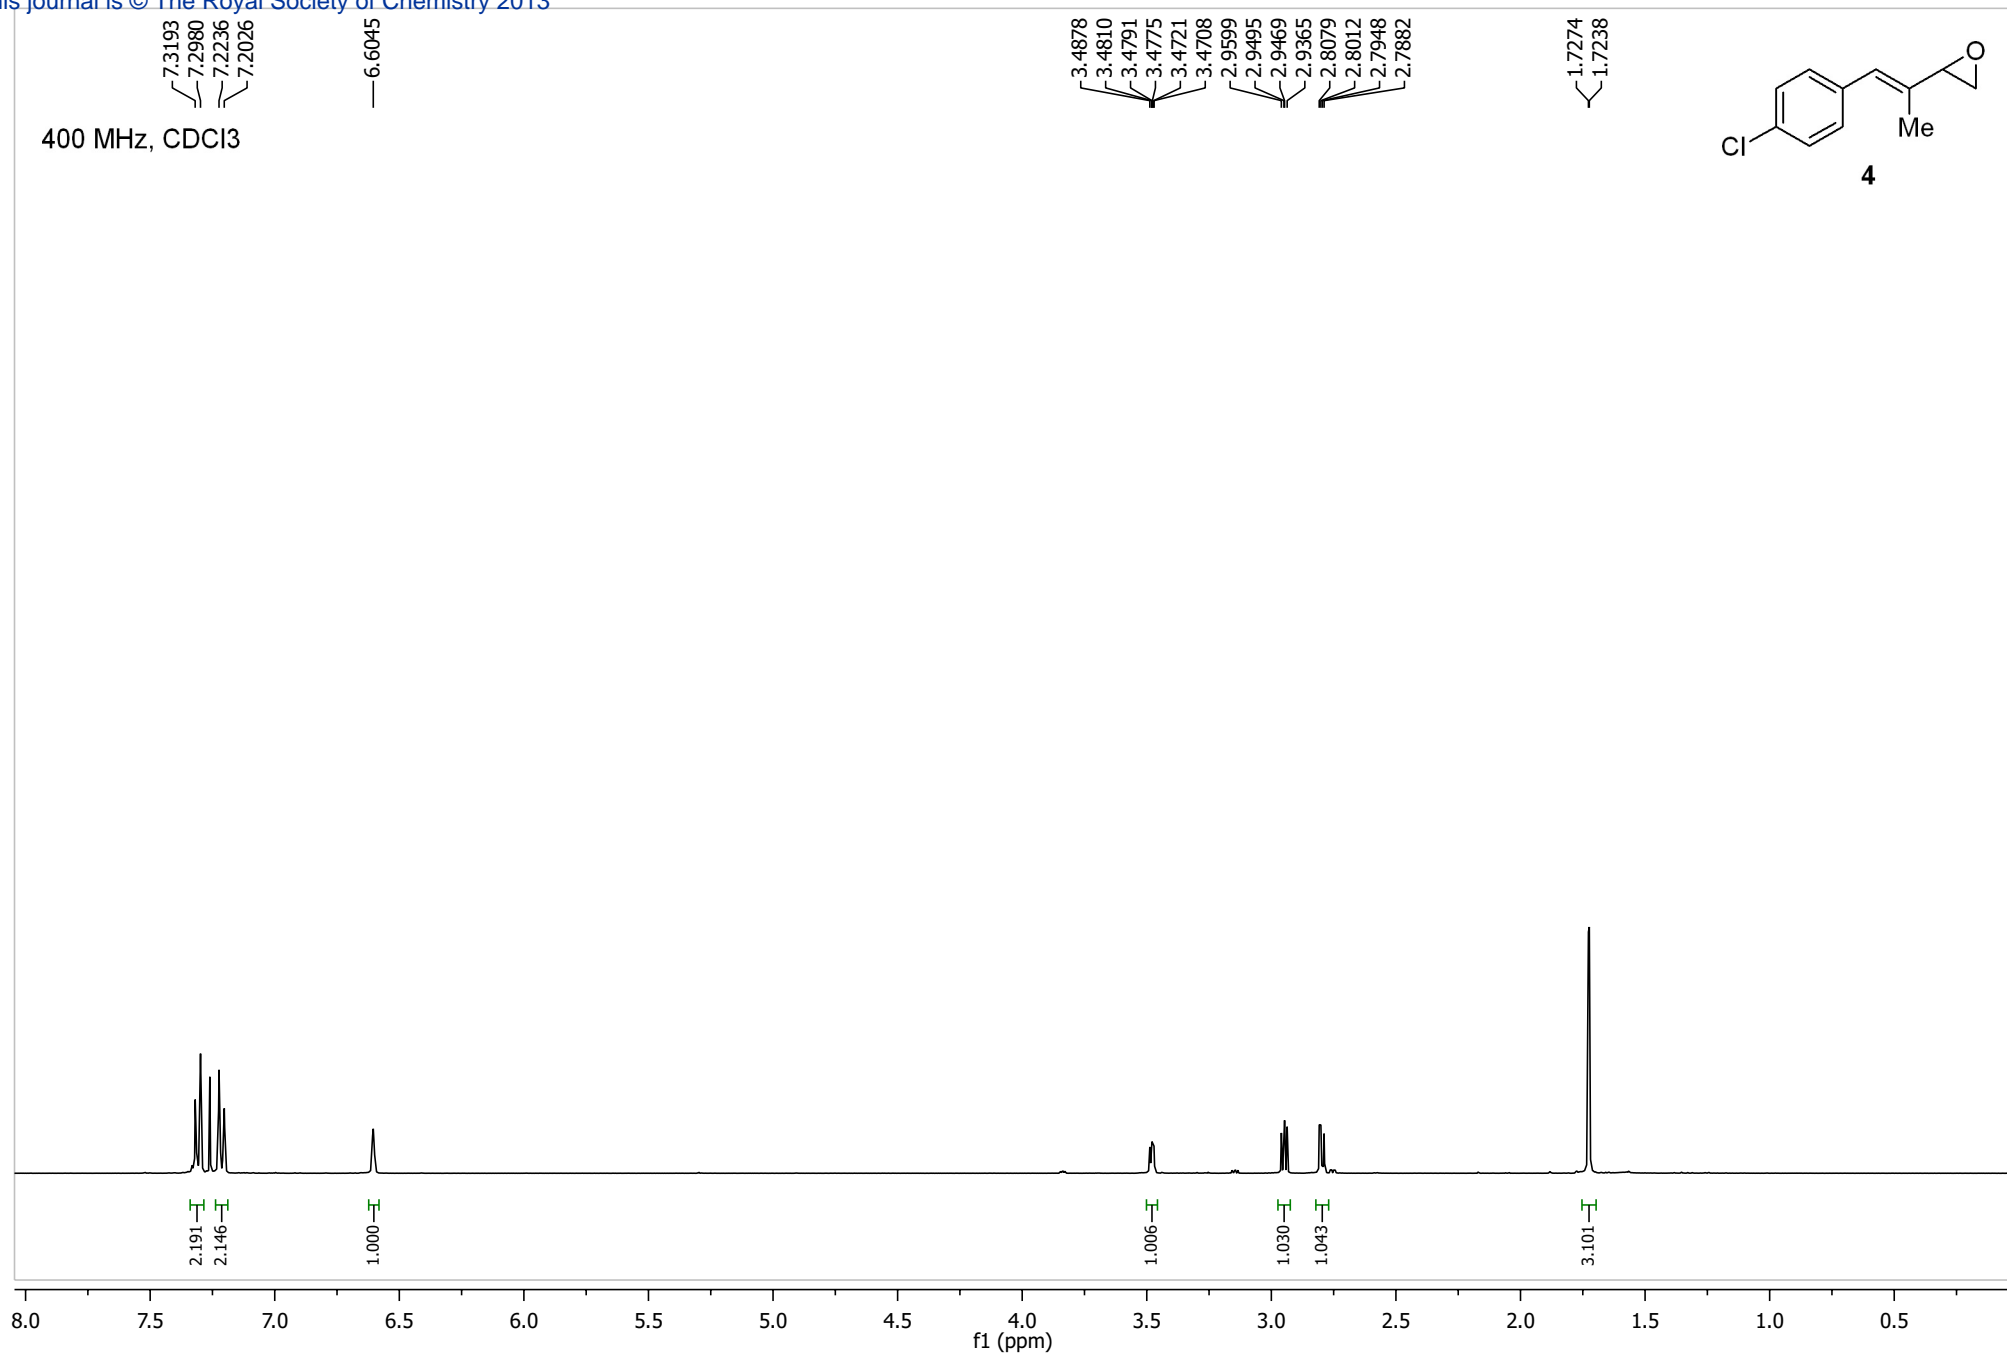

101 MHz, CDCl<sub>3</sub>

135.6329  
135.0436  
132.6145  
130.3120  
128.5283  
127.5227

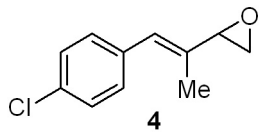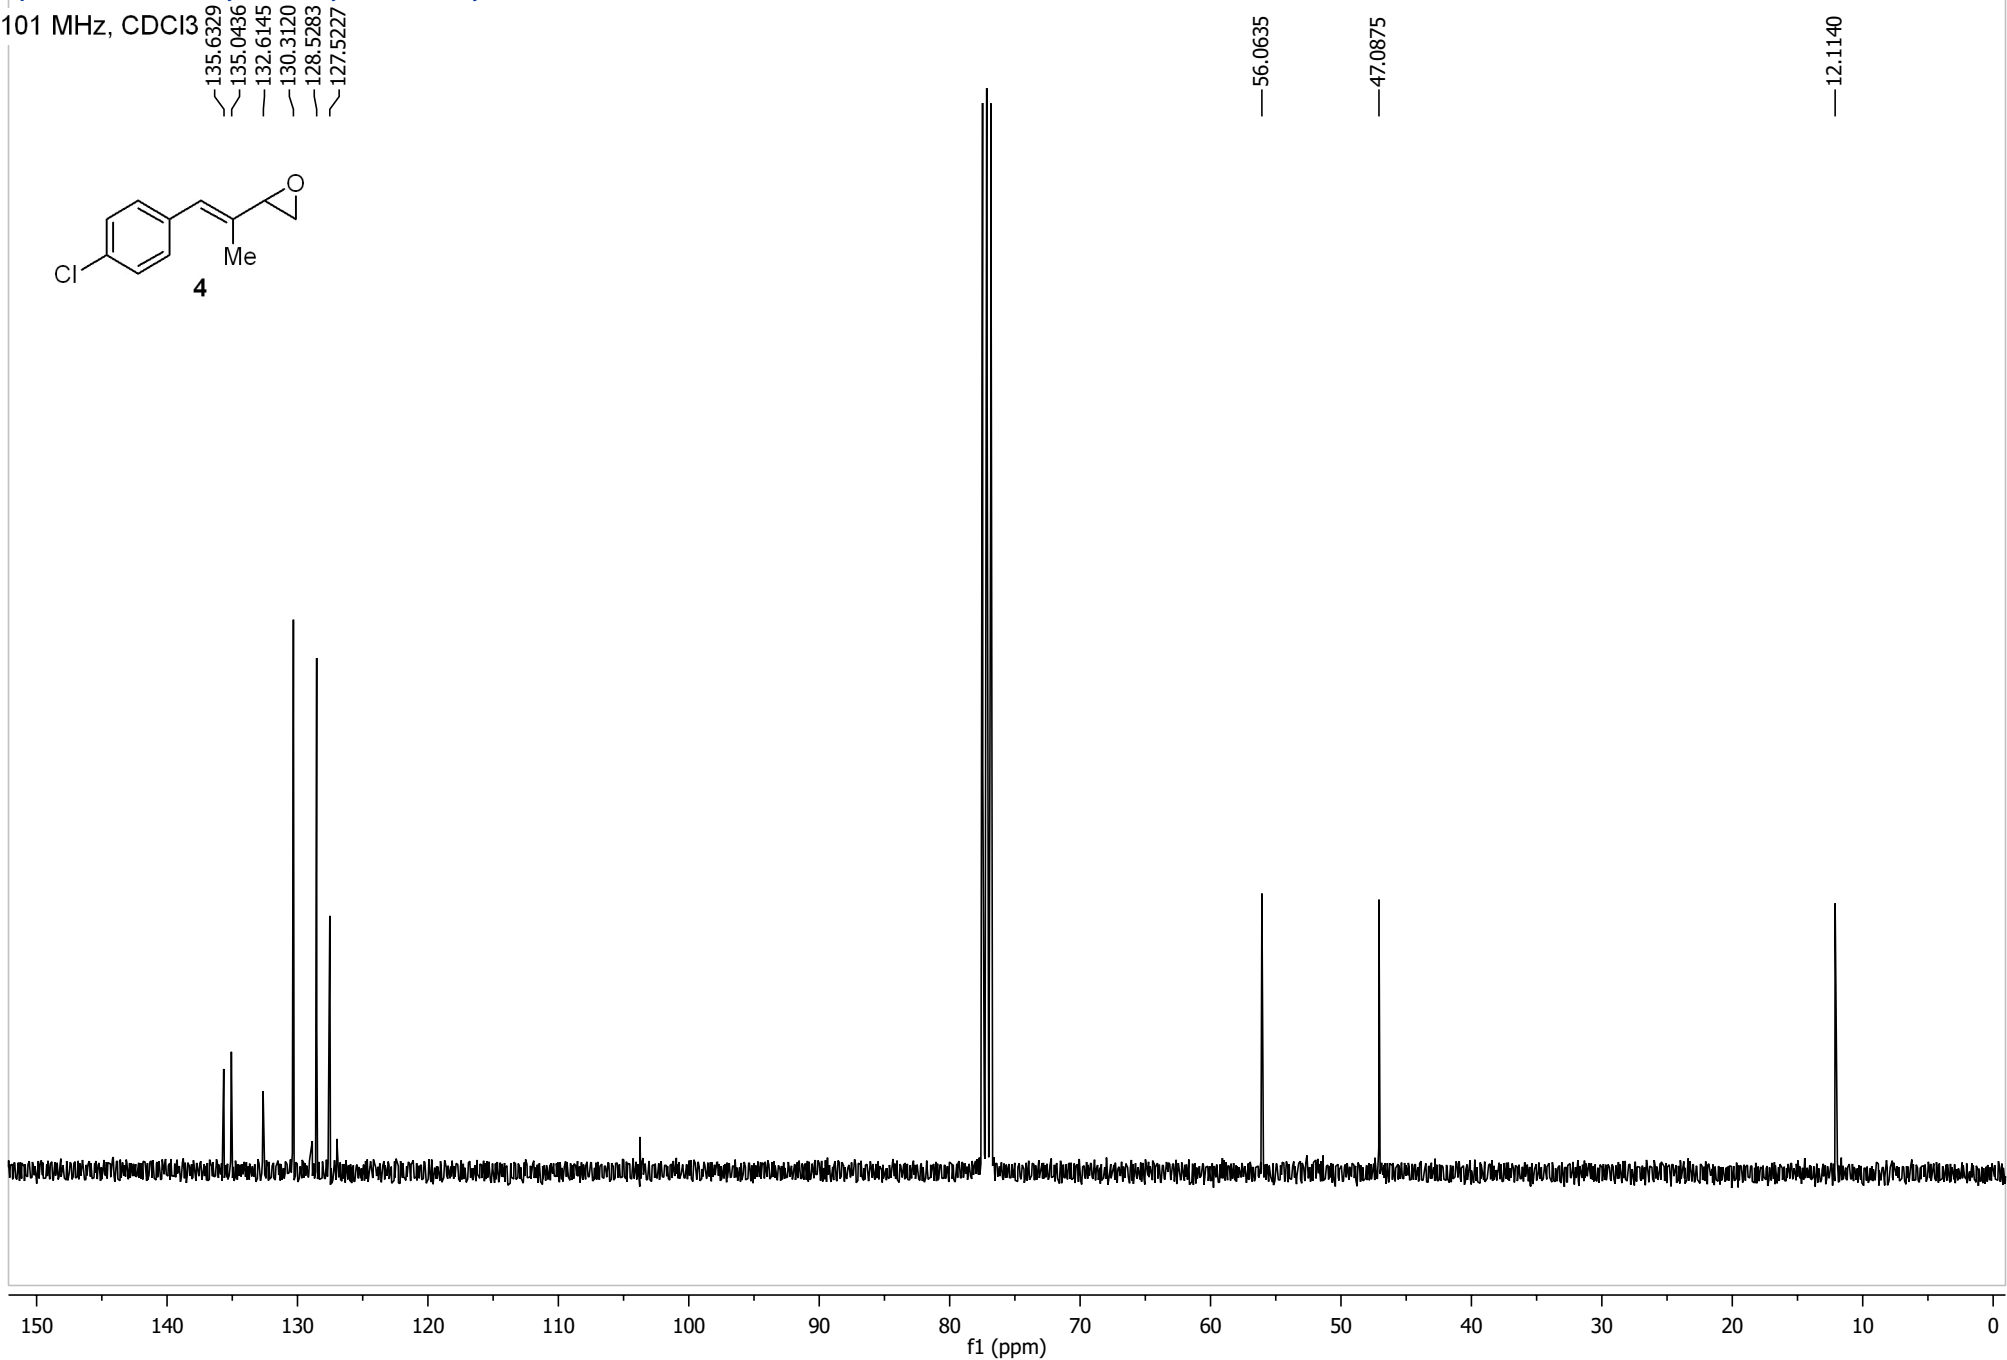

CDCl<sub>3</sub>, 400 MHz

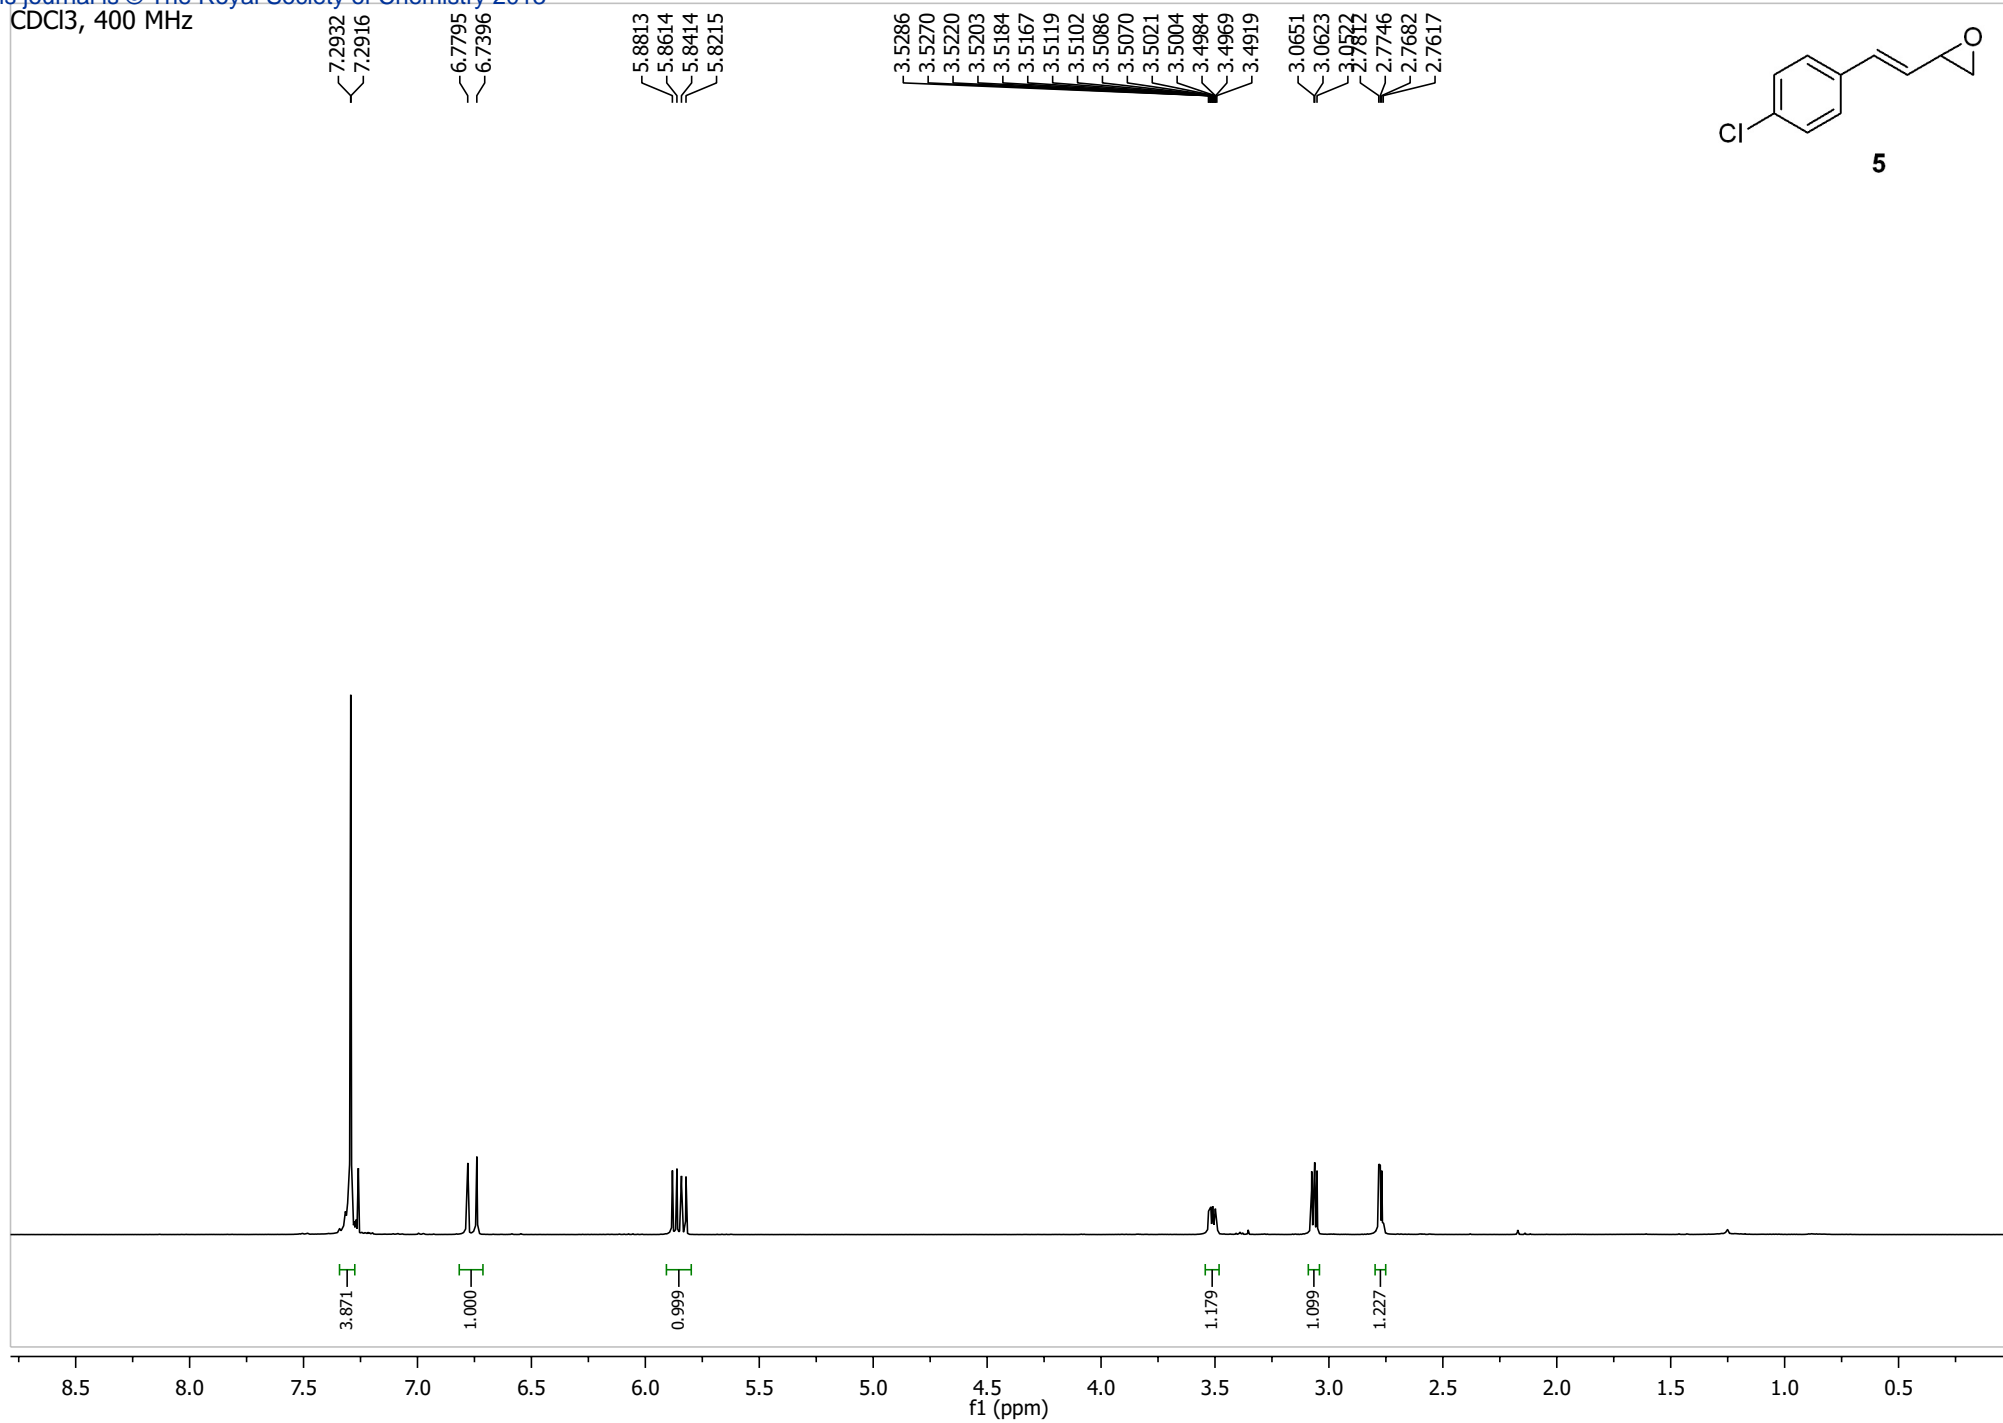

CDCl<sub>3</sub>, 101 MHz

134.6818  
133.8179  
133.3595  
128.9422  
127.7768  
127.7441

52.5938  
49.3976

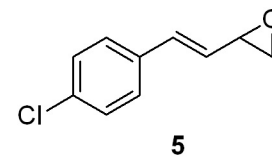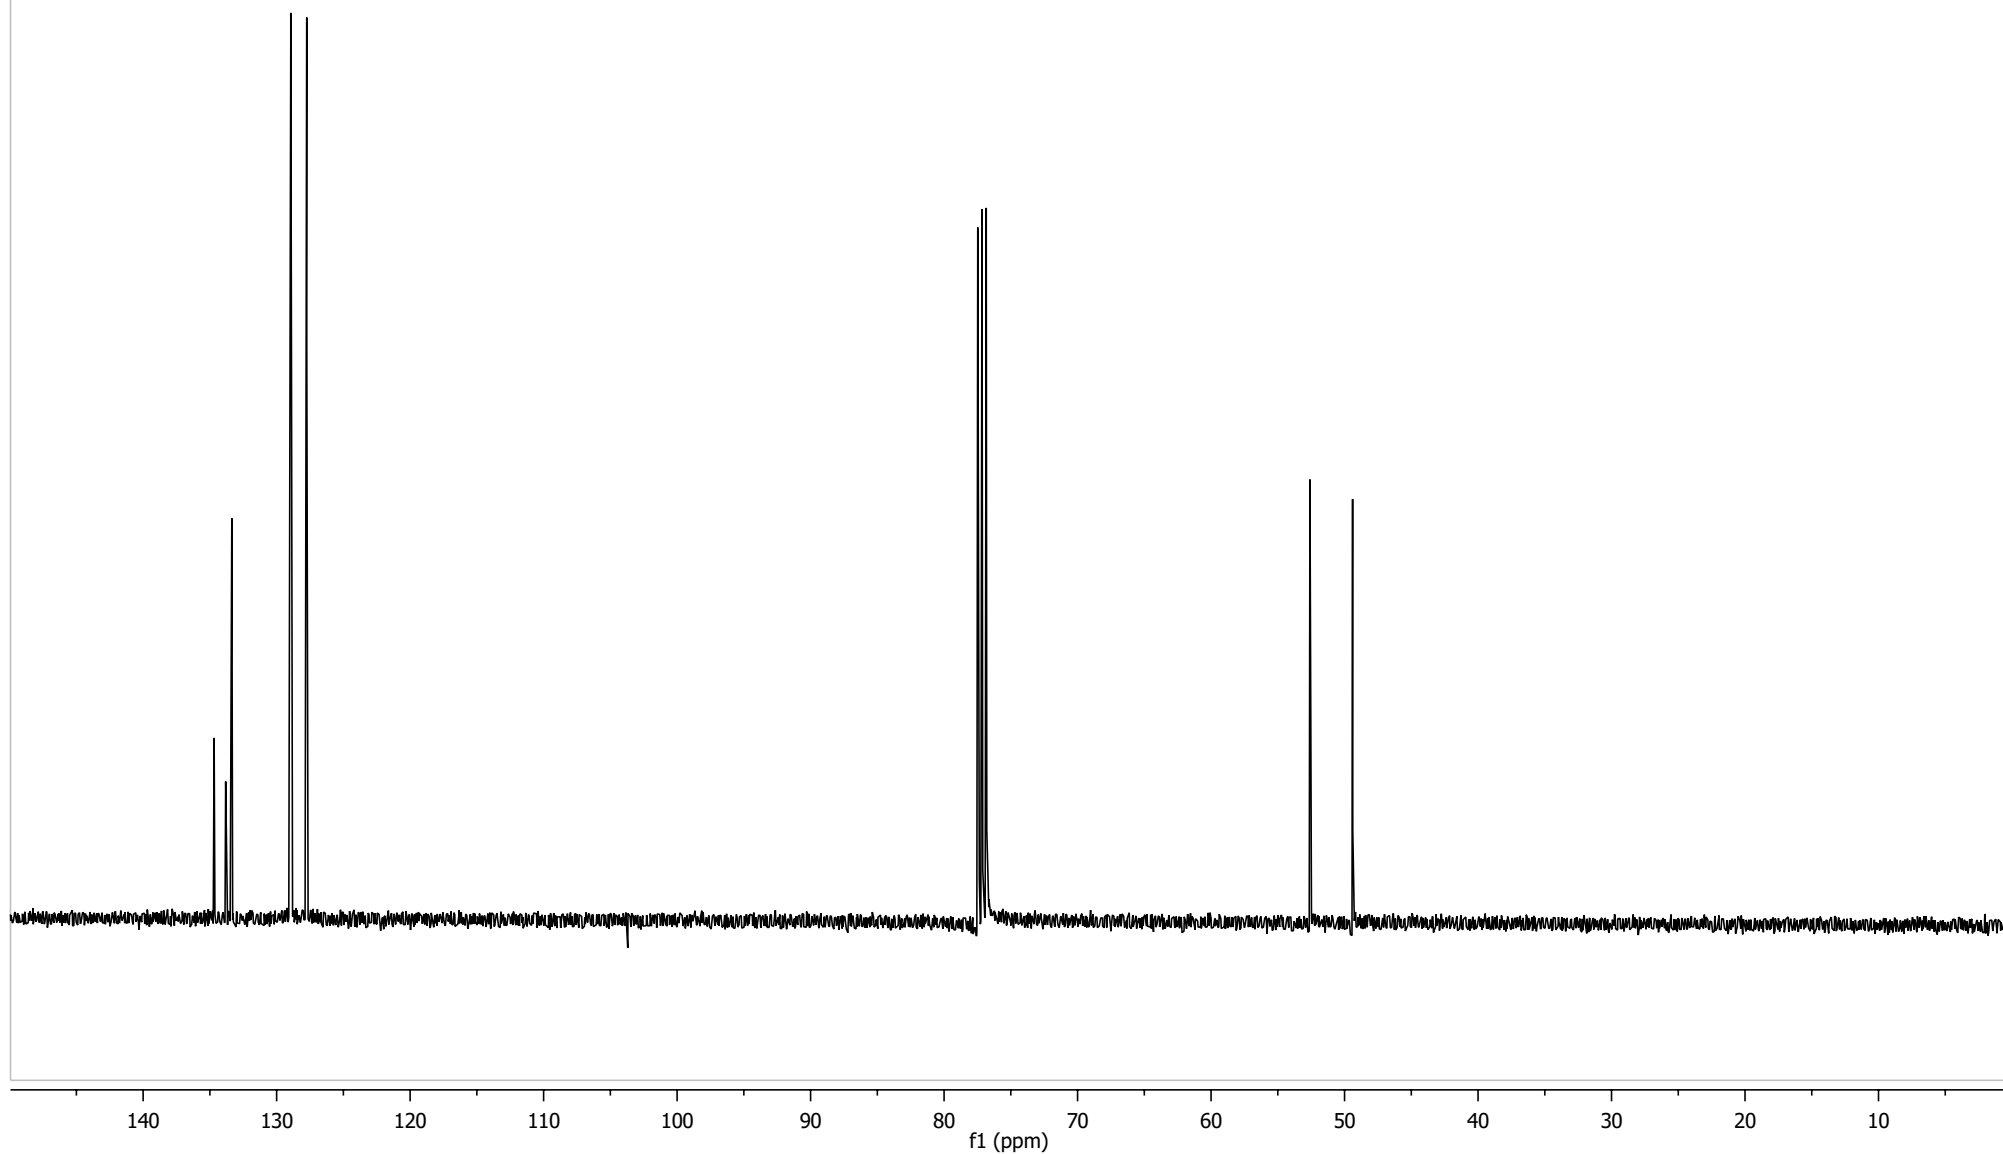

400 MHz, CDCl<sub>3</sub>

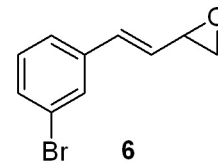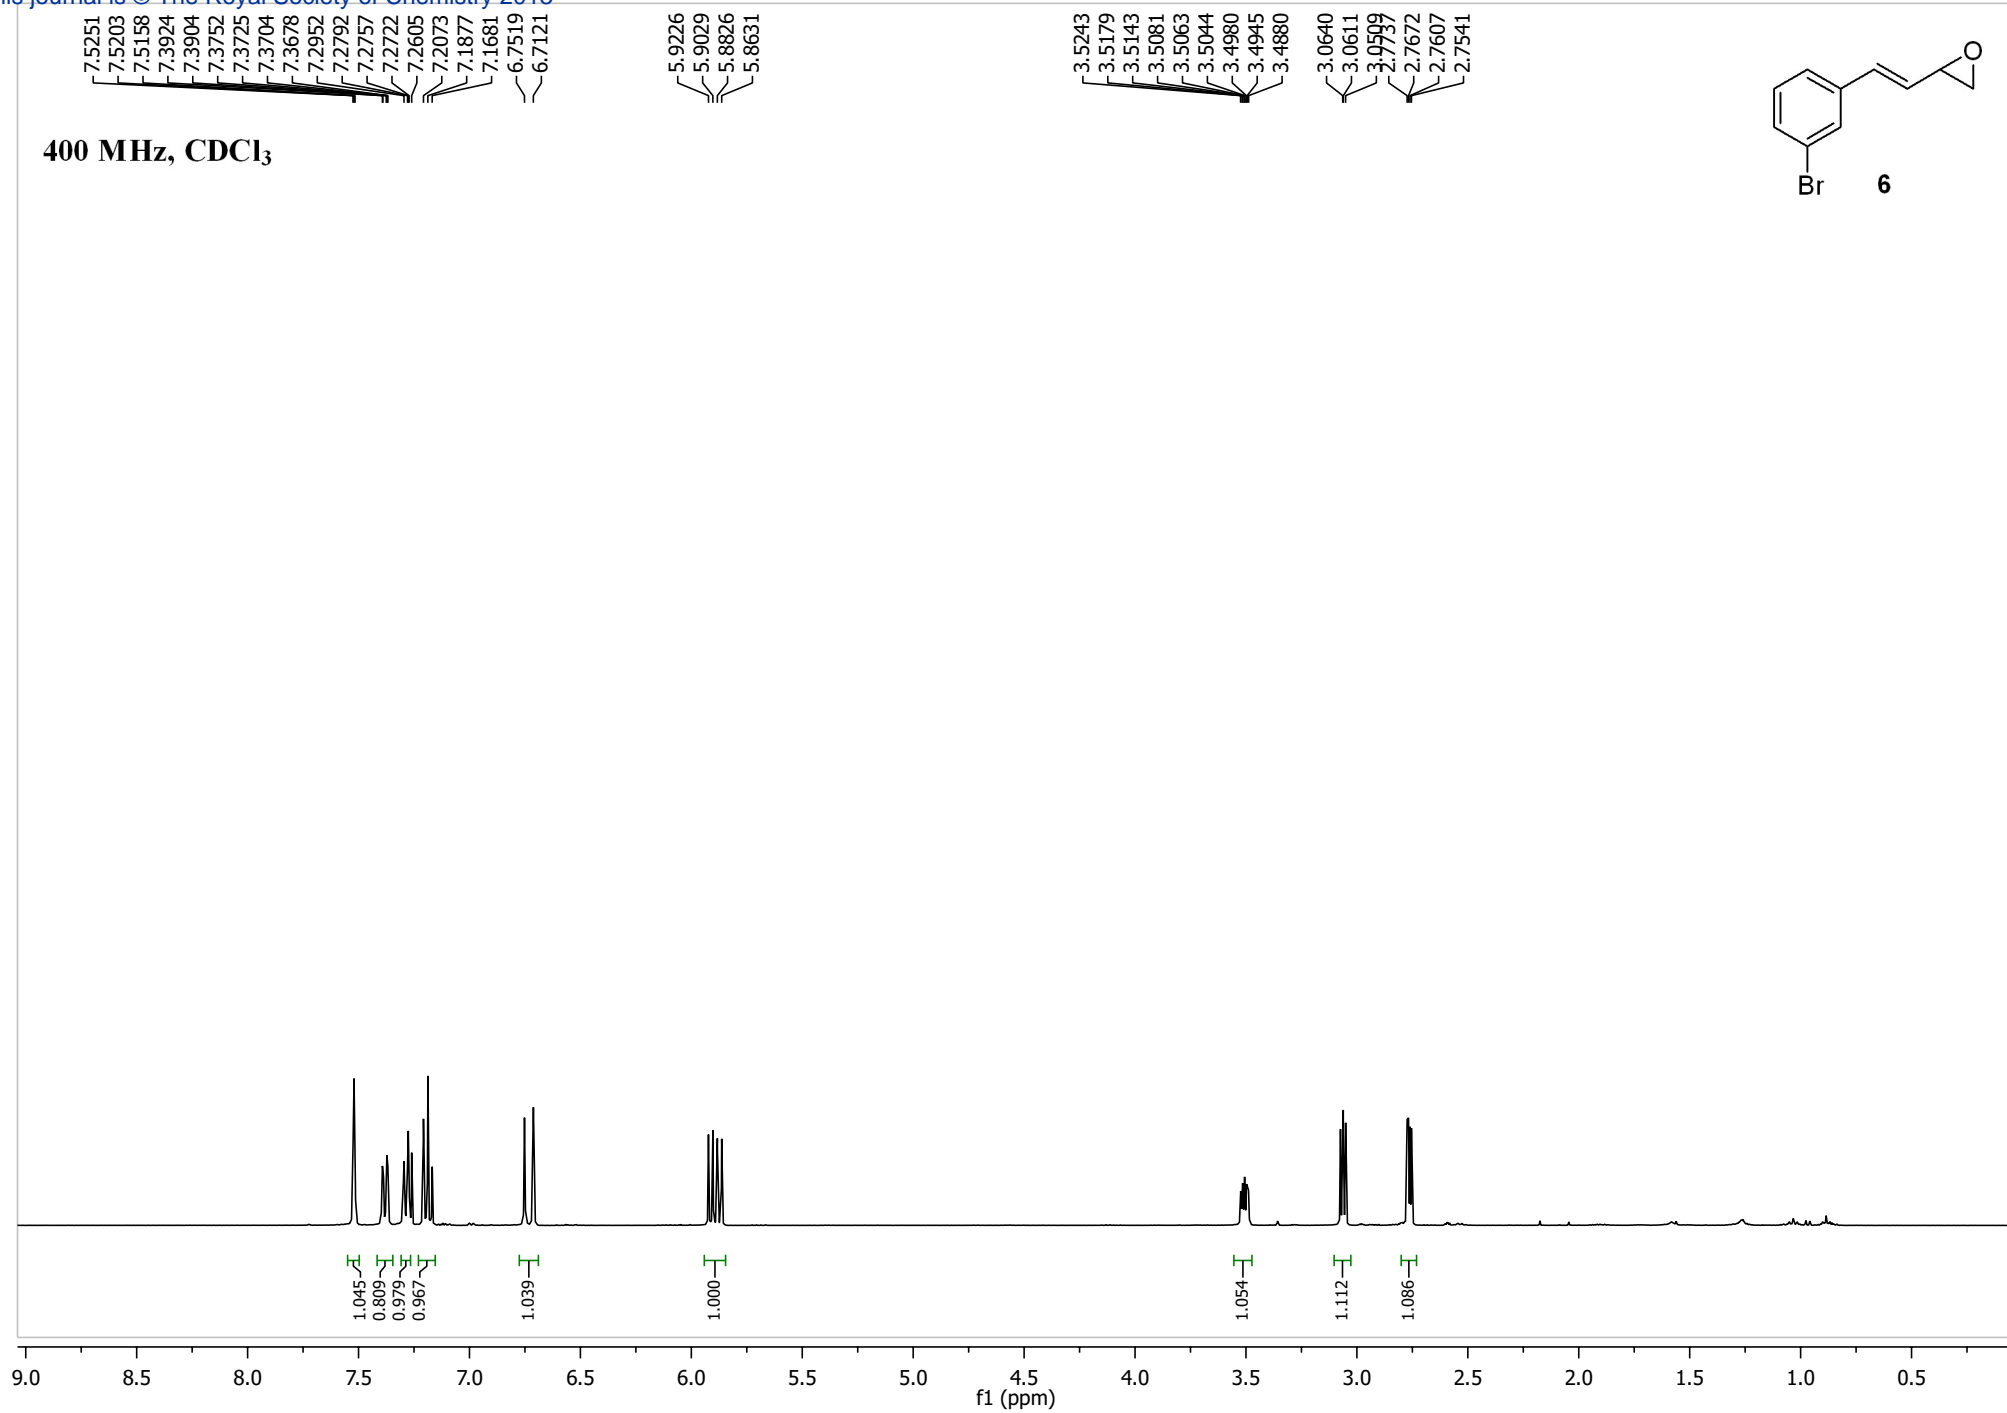



CDCl<sub>3</sub>, 101 MHz

138.3804  
132.9972  
131.0352  
130.2854  
129.4550  
128.8274  
125.1892  
122.9591

52.3945  
49.3908

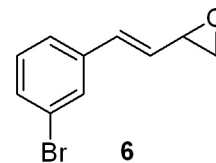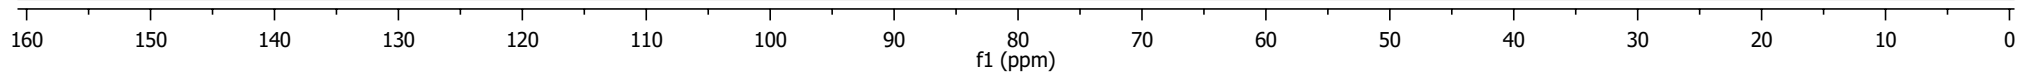

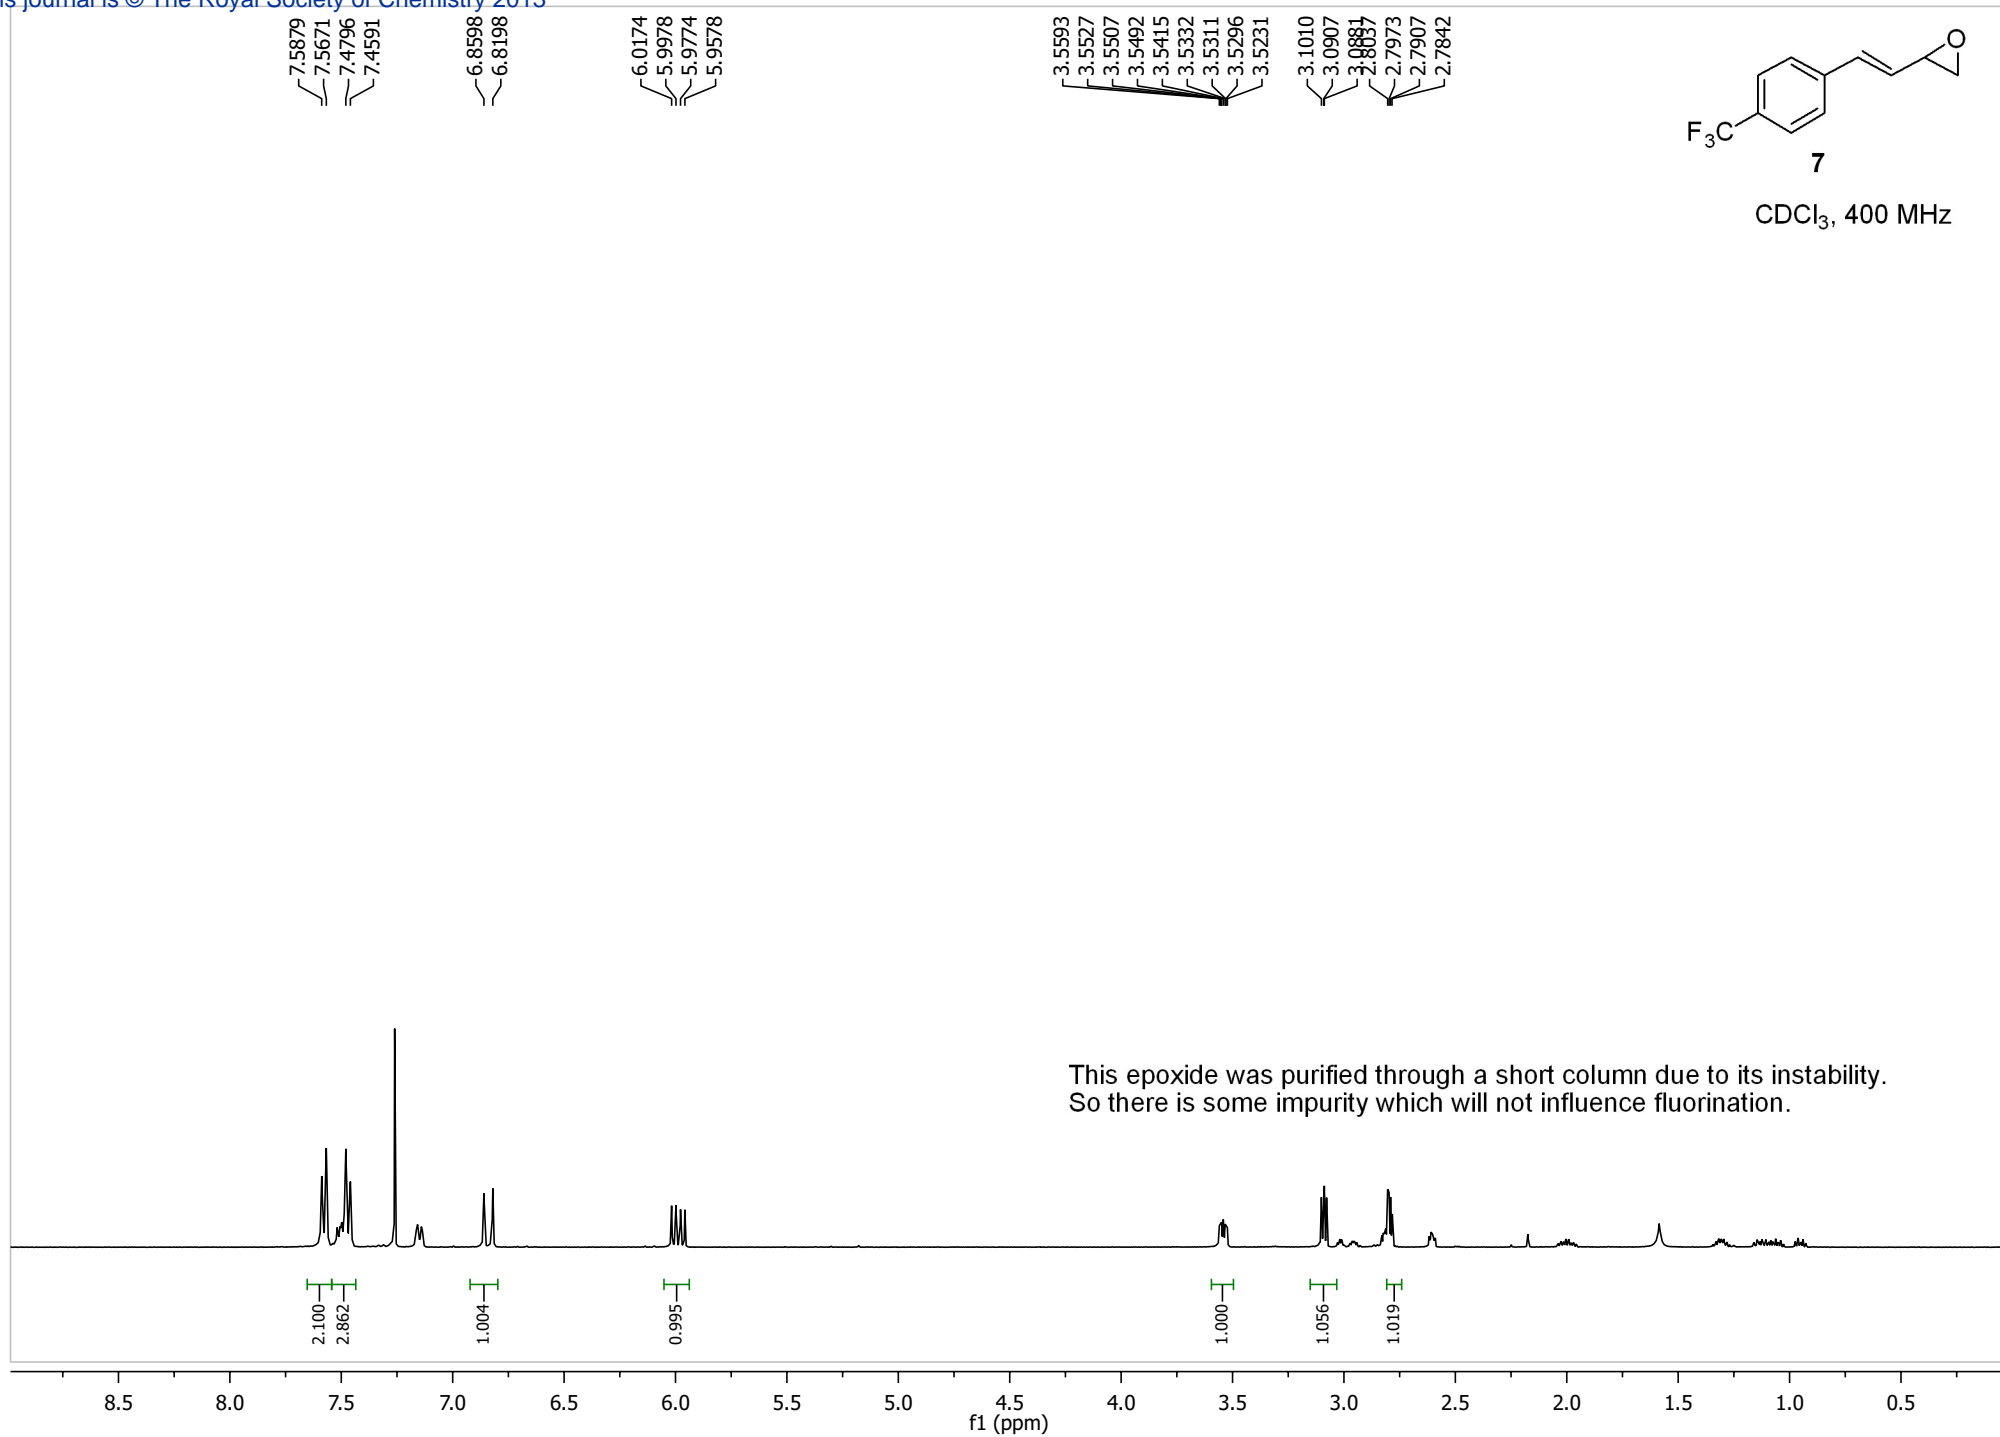

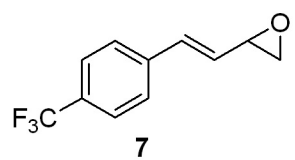

101 MHz, CDCl<sub>3</sub>

133.0278  
129.8947  
126.7128  
126.2172  
126.0342  
125.7718  
125.7308

52.3722  
49.4282

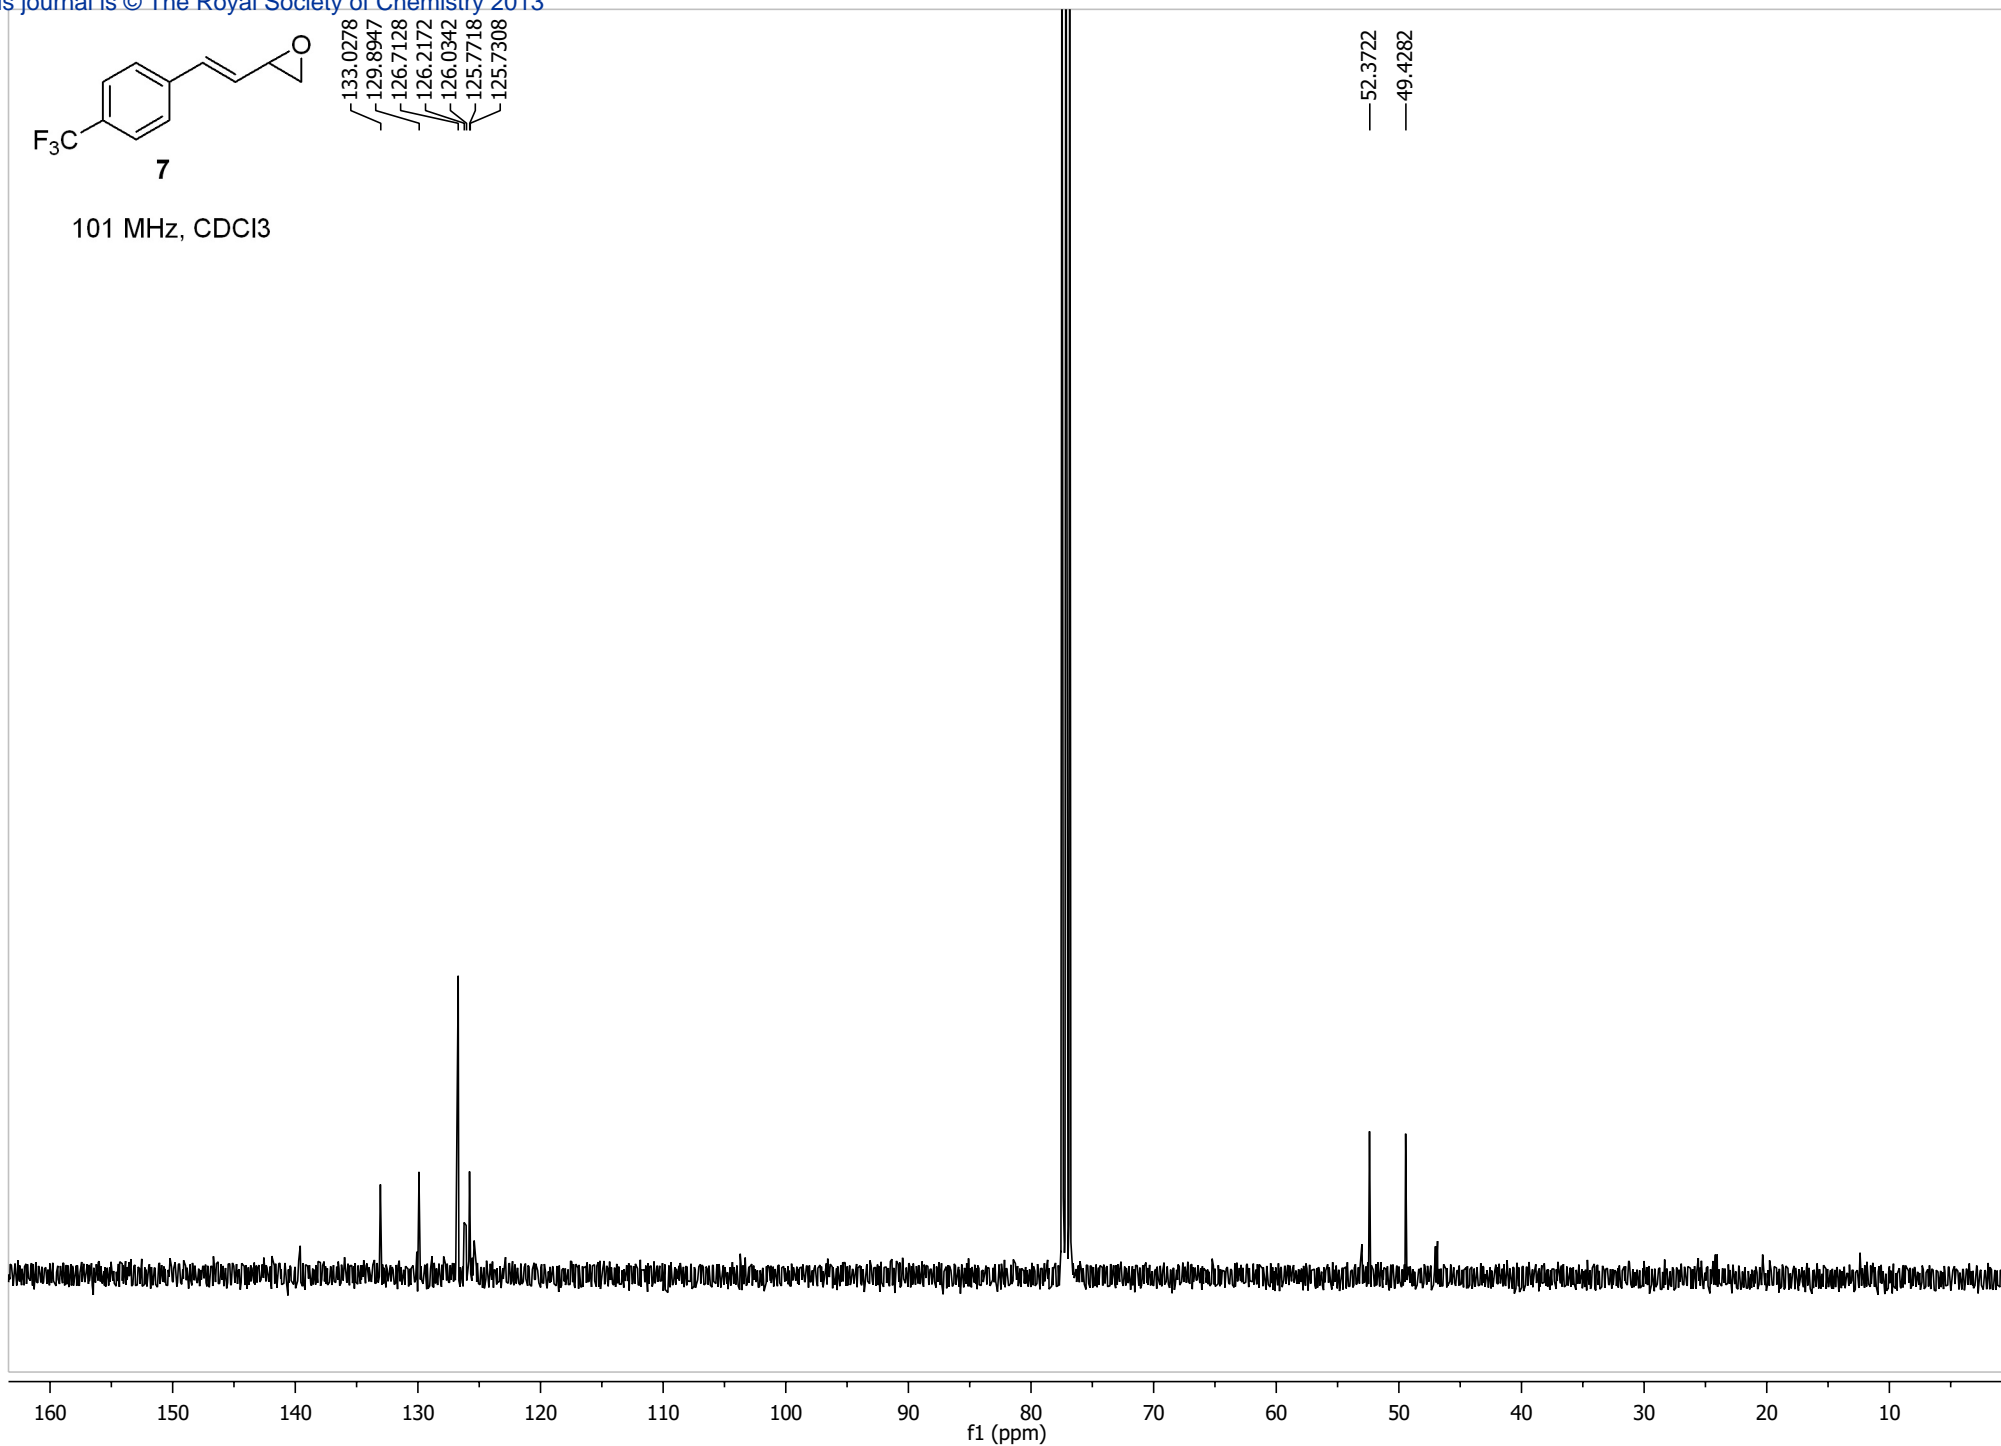

CDCl<sub>3</sub>, 500 MHz

7.3896  
7.3754  
7.3418  
7.3273  
7.3118  
7.2767  
7.2604  
6.8367  
6.8048

5.9060  
5.8901  
5.8741  
5.8582

3.5419  
3.5411  
3.5366  
3.5357  
3.5340  
3.5331  
3.5274  
3.5264  
3.5207  
3.5197  
3.5180  
3.5126

3.0658  
3.0637  
3.0555  
2.7822  
2.7771  
2.7719

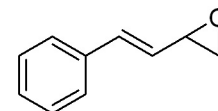

8

2.155  
2.142  
1.437

1.003

1.000

1.006

1.039

1.046

8.5 8.0 7.5 7.0 6.5 6.0 5.5 5.0 4.5 4.0 3.5 3.0 2.5 2.0 1.5 1.0 0.5 0.0

f1 (ppm)

CDCl<sub>3</sub>, 126 MHz

136.2656  
134.7227  
128.7901  
128.2164  
127.1165  
126.5836

52.7746  
49.3995

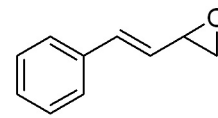

8

160 150 140 130 120 110 100 90 80 70 60 50 40 30 20 10 0

f1 (ppm)

CDCl<sub>3</sub>, 500 MHz

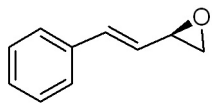

(R)-8

7.3896  
7.3754  
7.3418  
7.3273  
7.3118  
7.2767  
7.2604  
6.8367  
6.8048

5.9060  
5.8901  
5.8741  
5.8582

3.5419  
3.5411  
3.5366  
3.5357  
3.5340  
3.5331  
3.5274  
3.5264  
3.5207  
3.5197  
3.5180  
3.5126

3.0658  
3.0637  
3.0555  
2.7822  
2.7771  
2.7719

2.155  
2.142  
1.437

1.003

1.000

1.006

1.039

1.046

8.5 8.0 7.5 7.0 6.5 6.0 5.5 5.0 4.5 4.0 3.5 3.0 2.5 2.0 1.5 1.0 0.5  
f1 (ppm)

CDCl<sub>3</sub>, 126 MHz

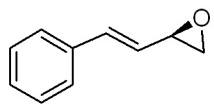

(*R*)-8

136.2656  
134.7227  
128.7901  
128.2164  
127.1165  
126.5836

52.7746  
49.3995

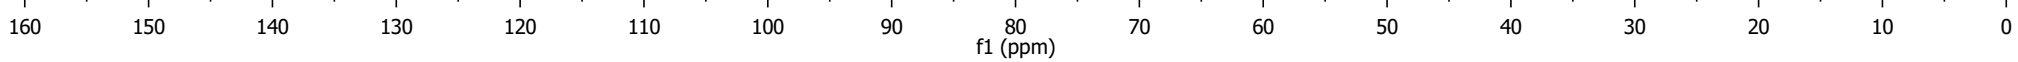

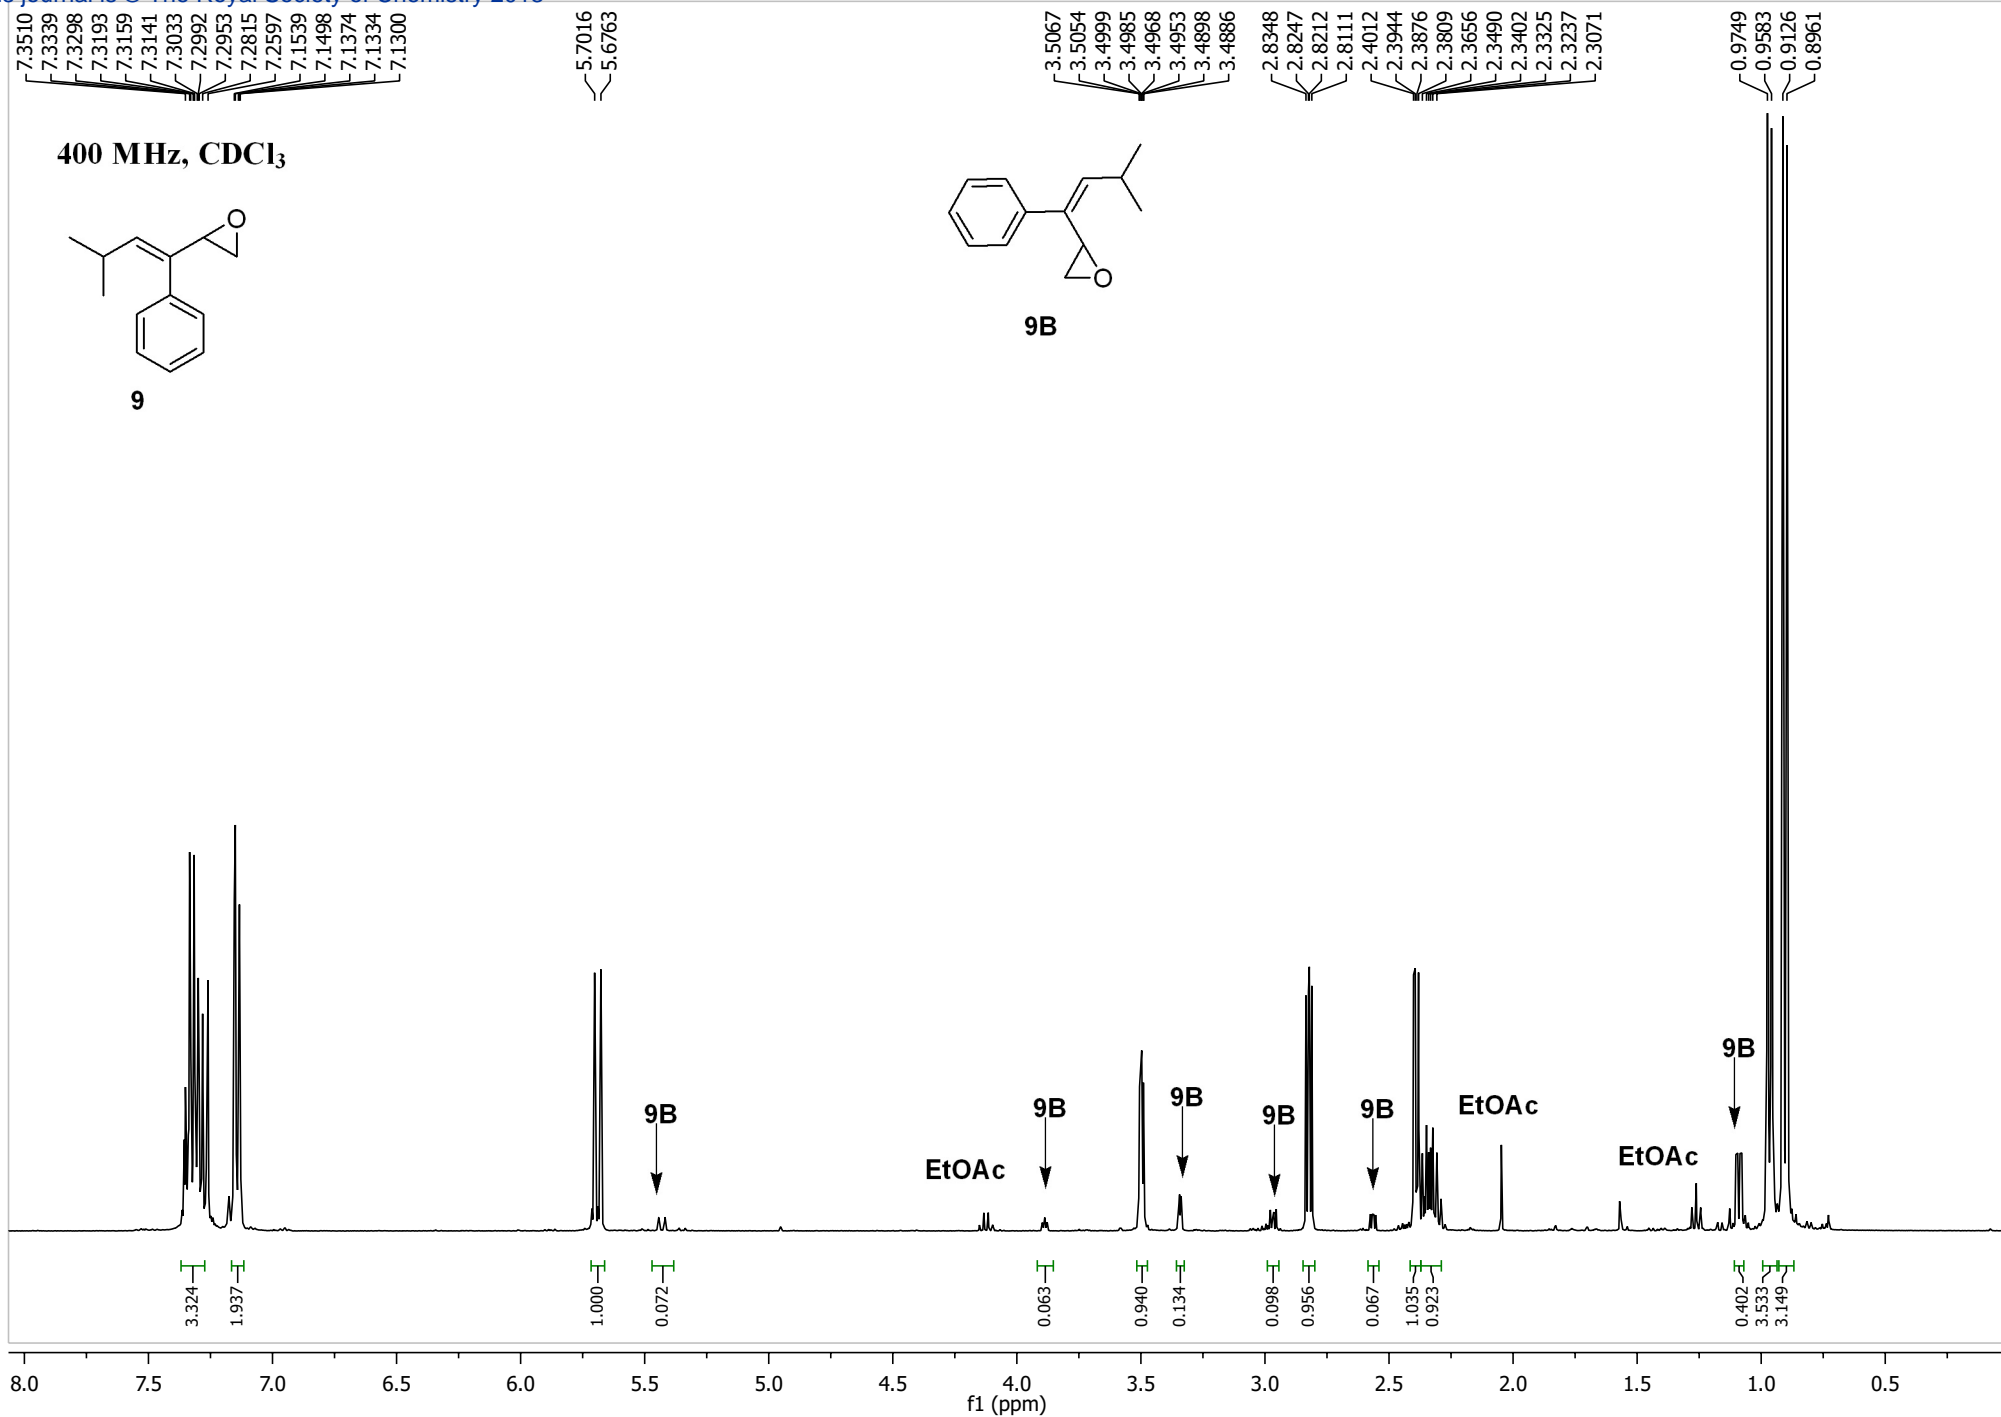



CDCl<sub>3</sub>, 126 MHz

139.9737  
136.3550  
135.0573

129.3068  
128.1247  
127.2828

55.1497

47.6236

28.0070

23.0964  
23.0118

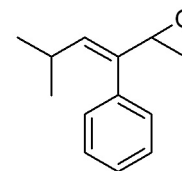

9

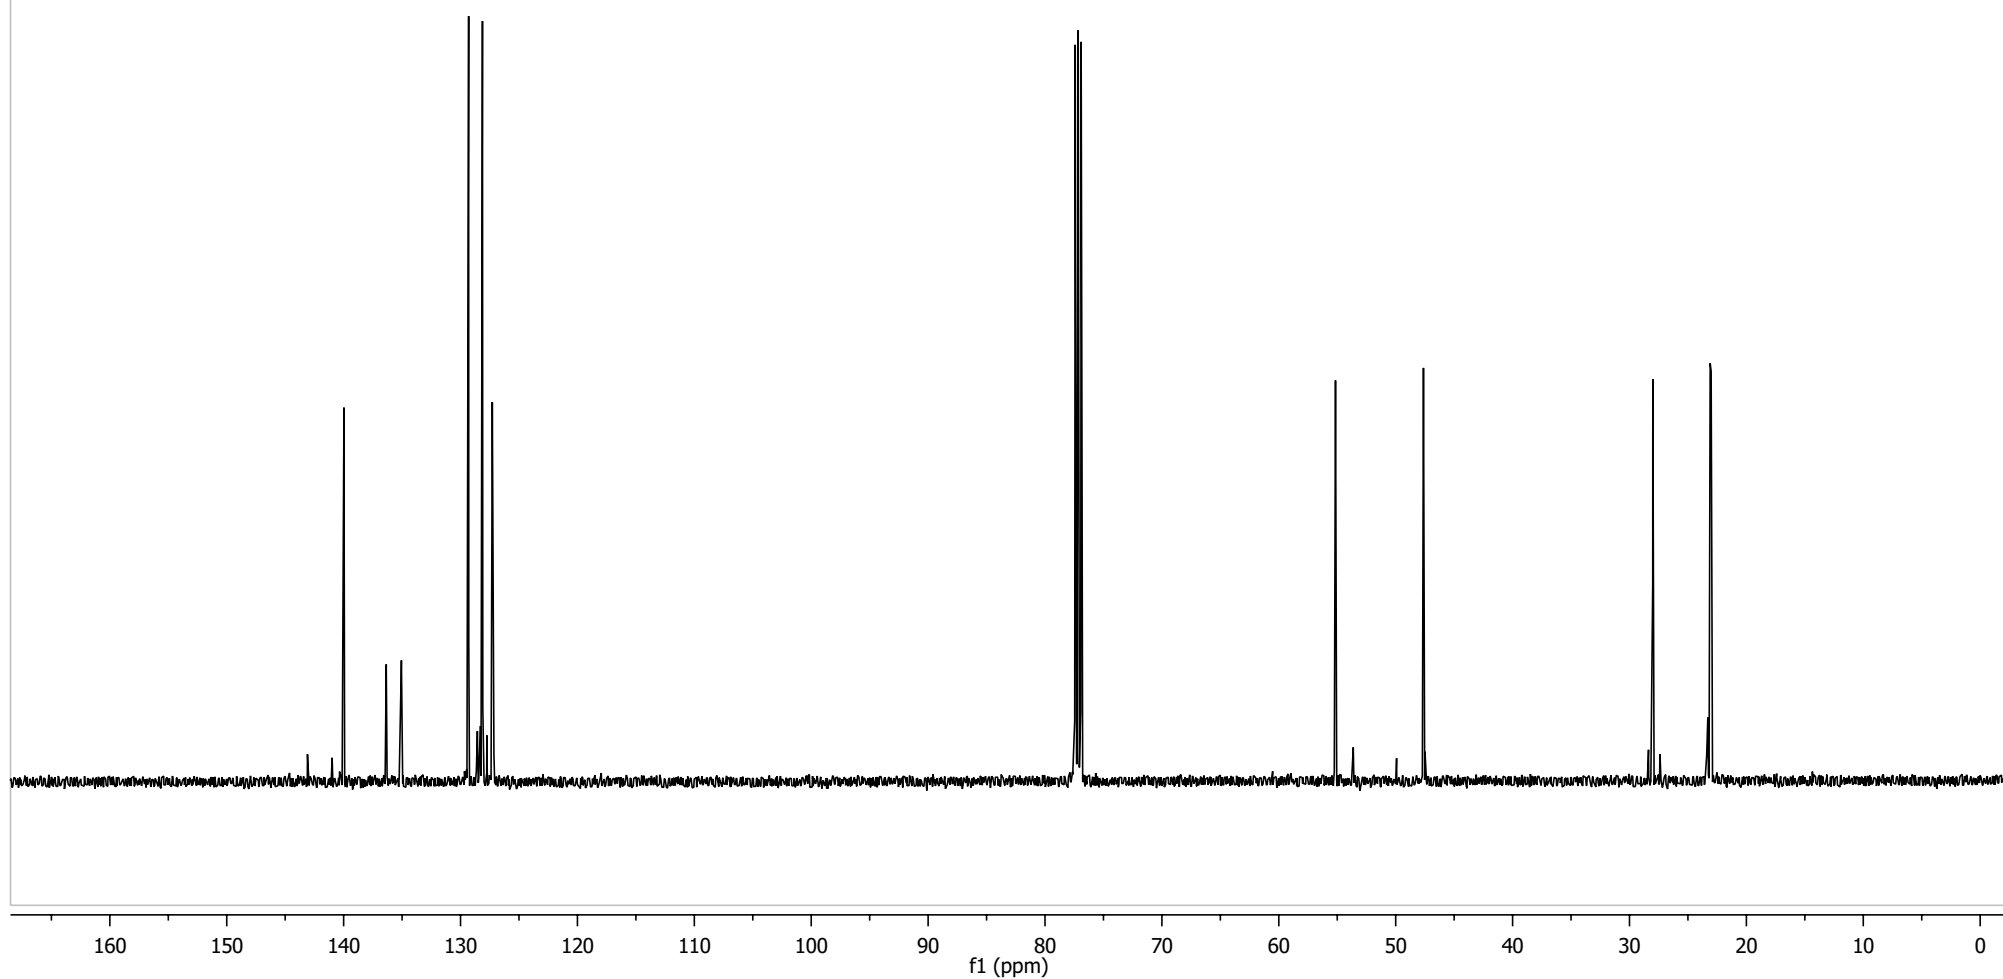

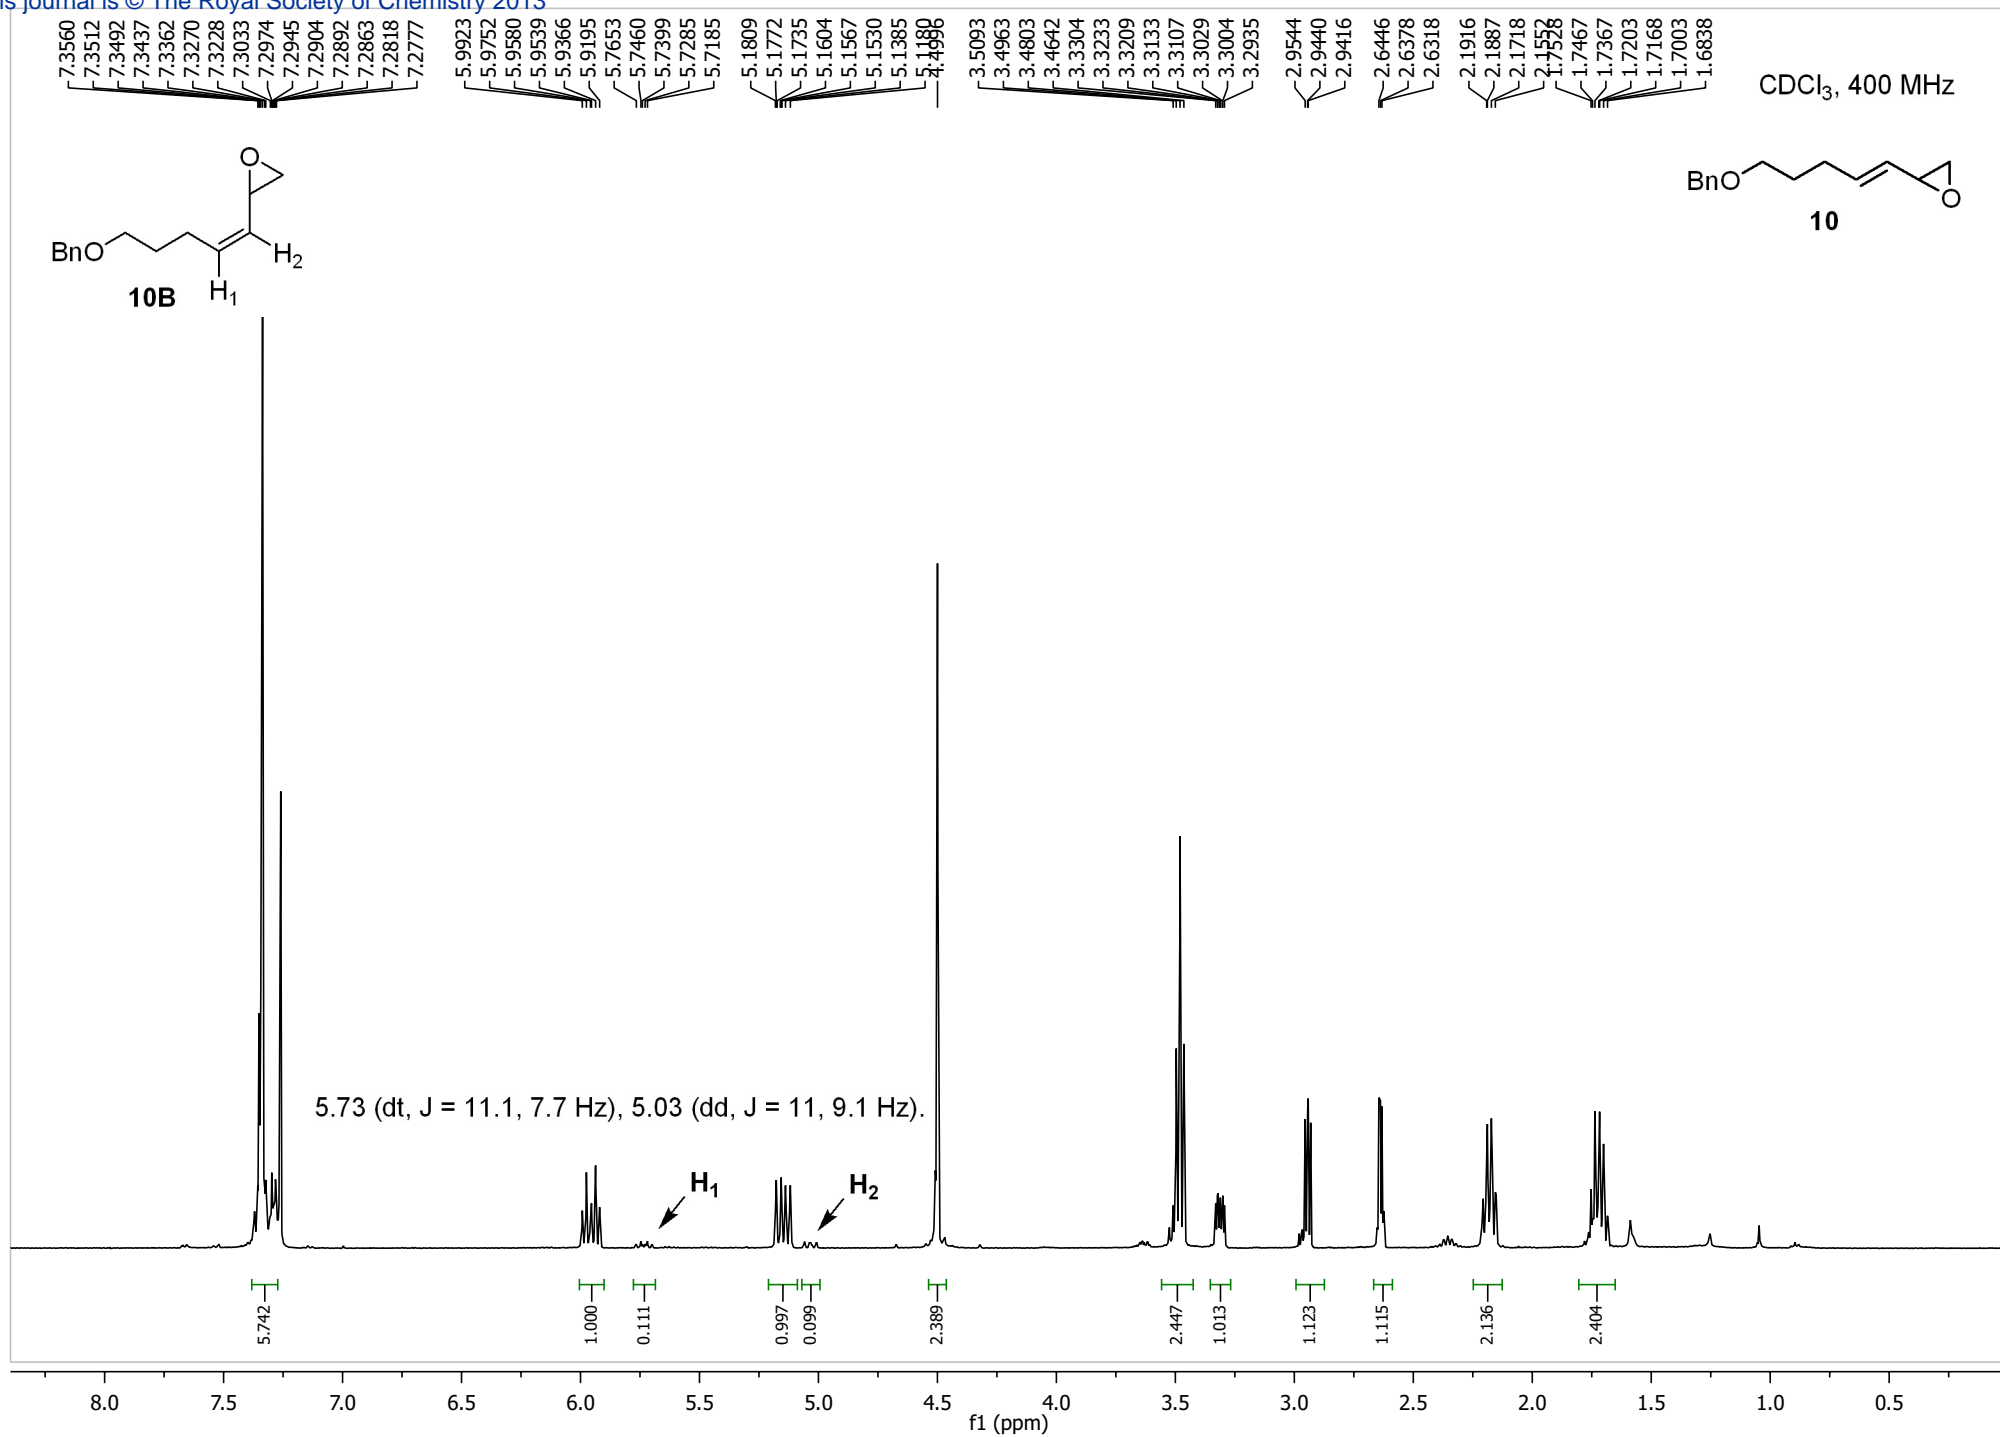

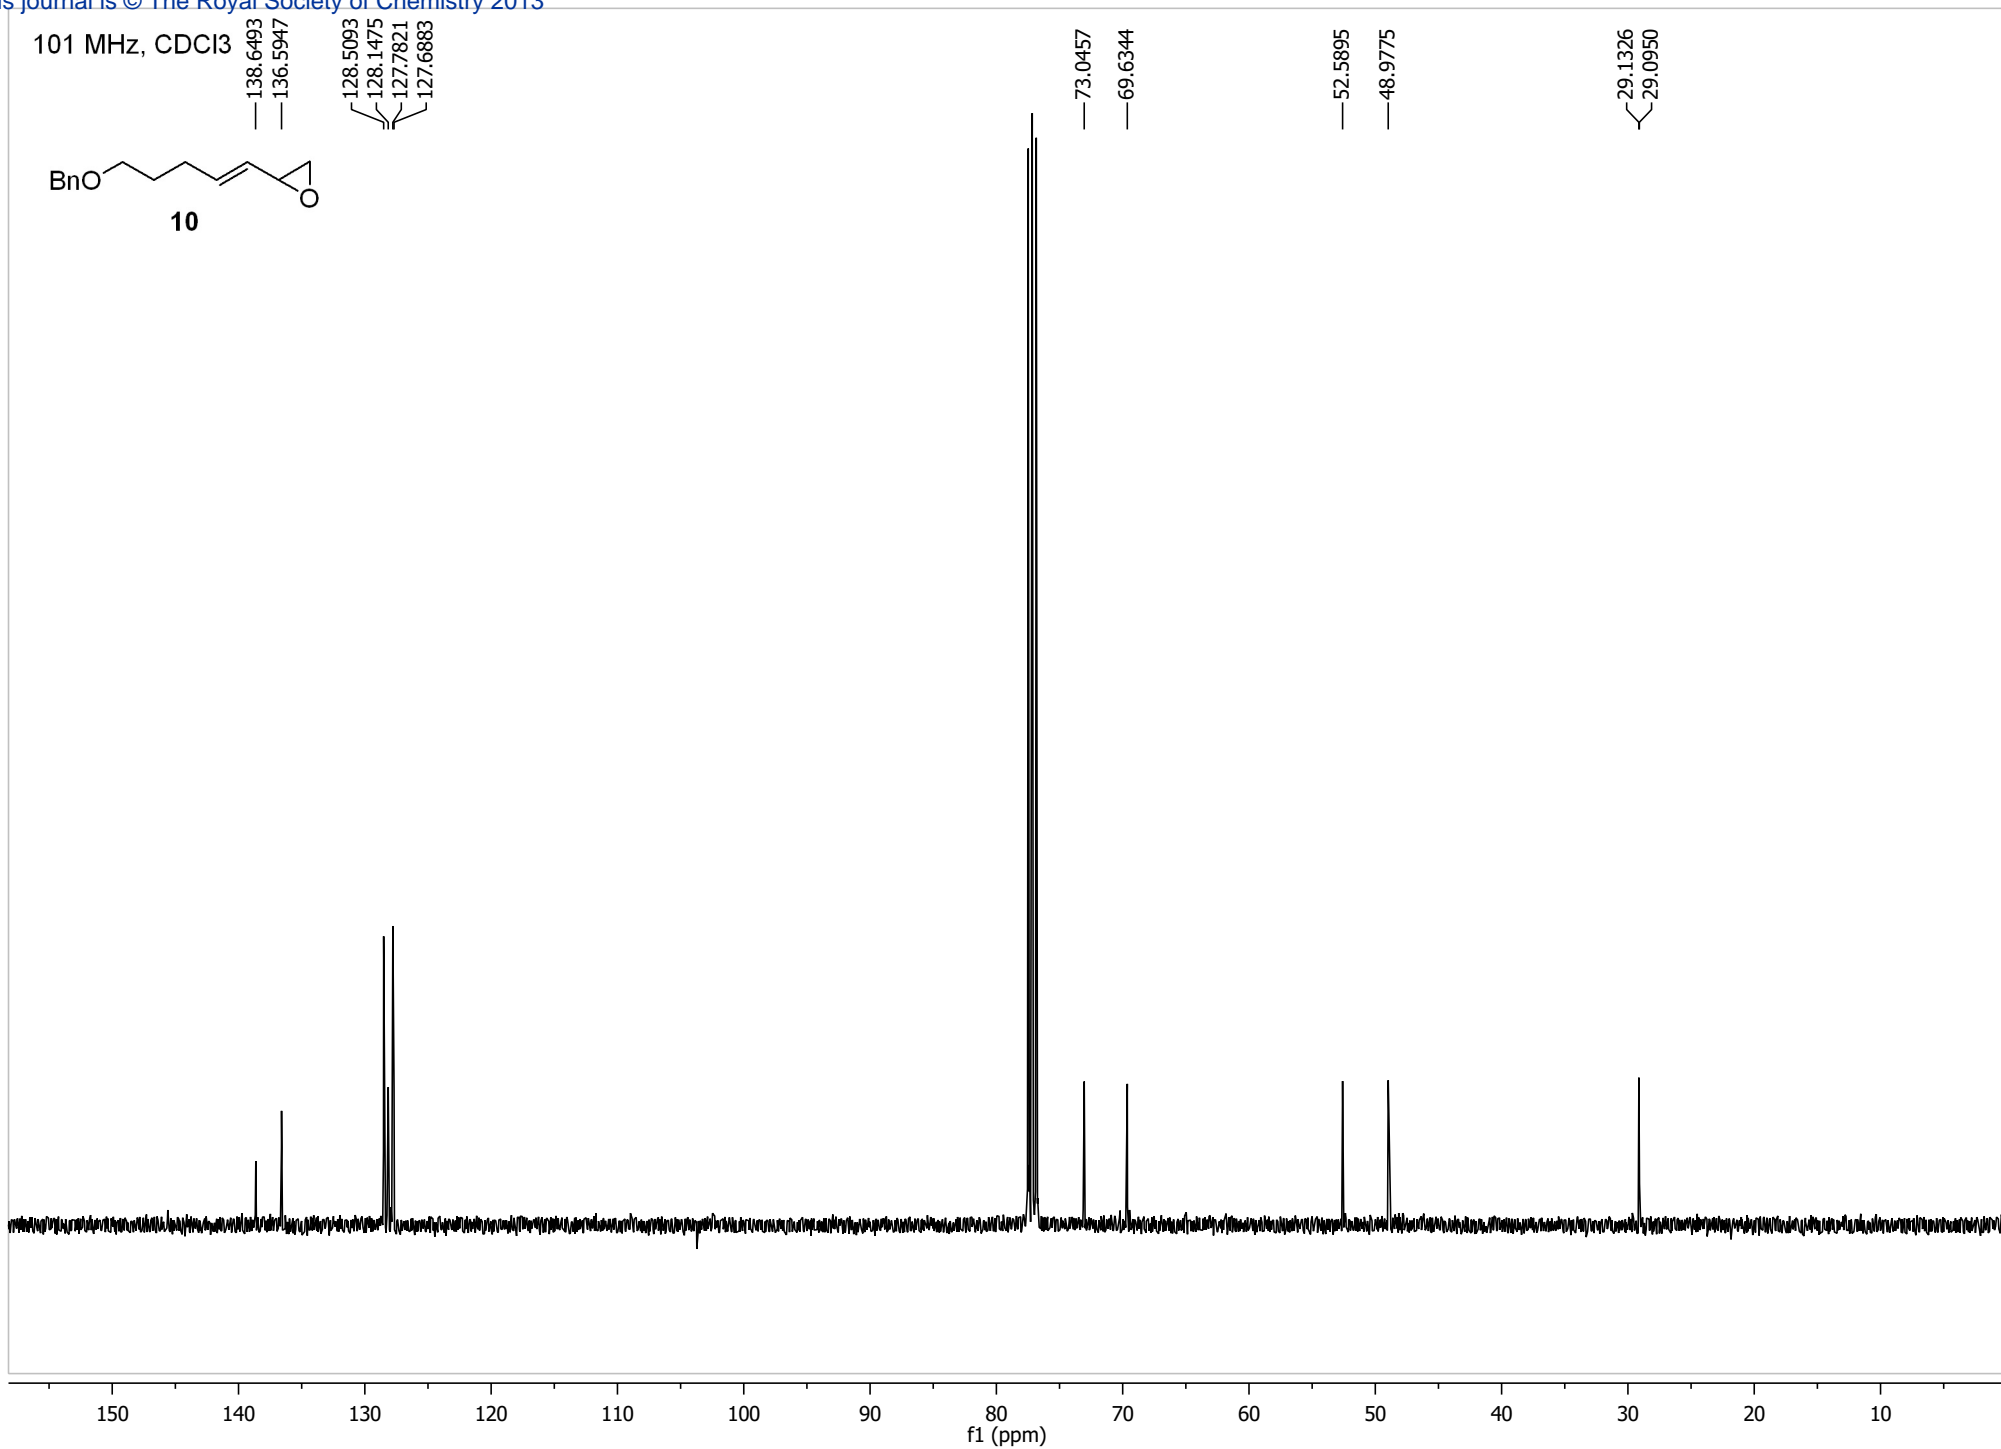

CDCl<sub>3</sub>, 400 MHz

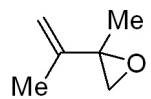

**13**

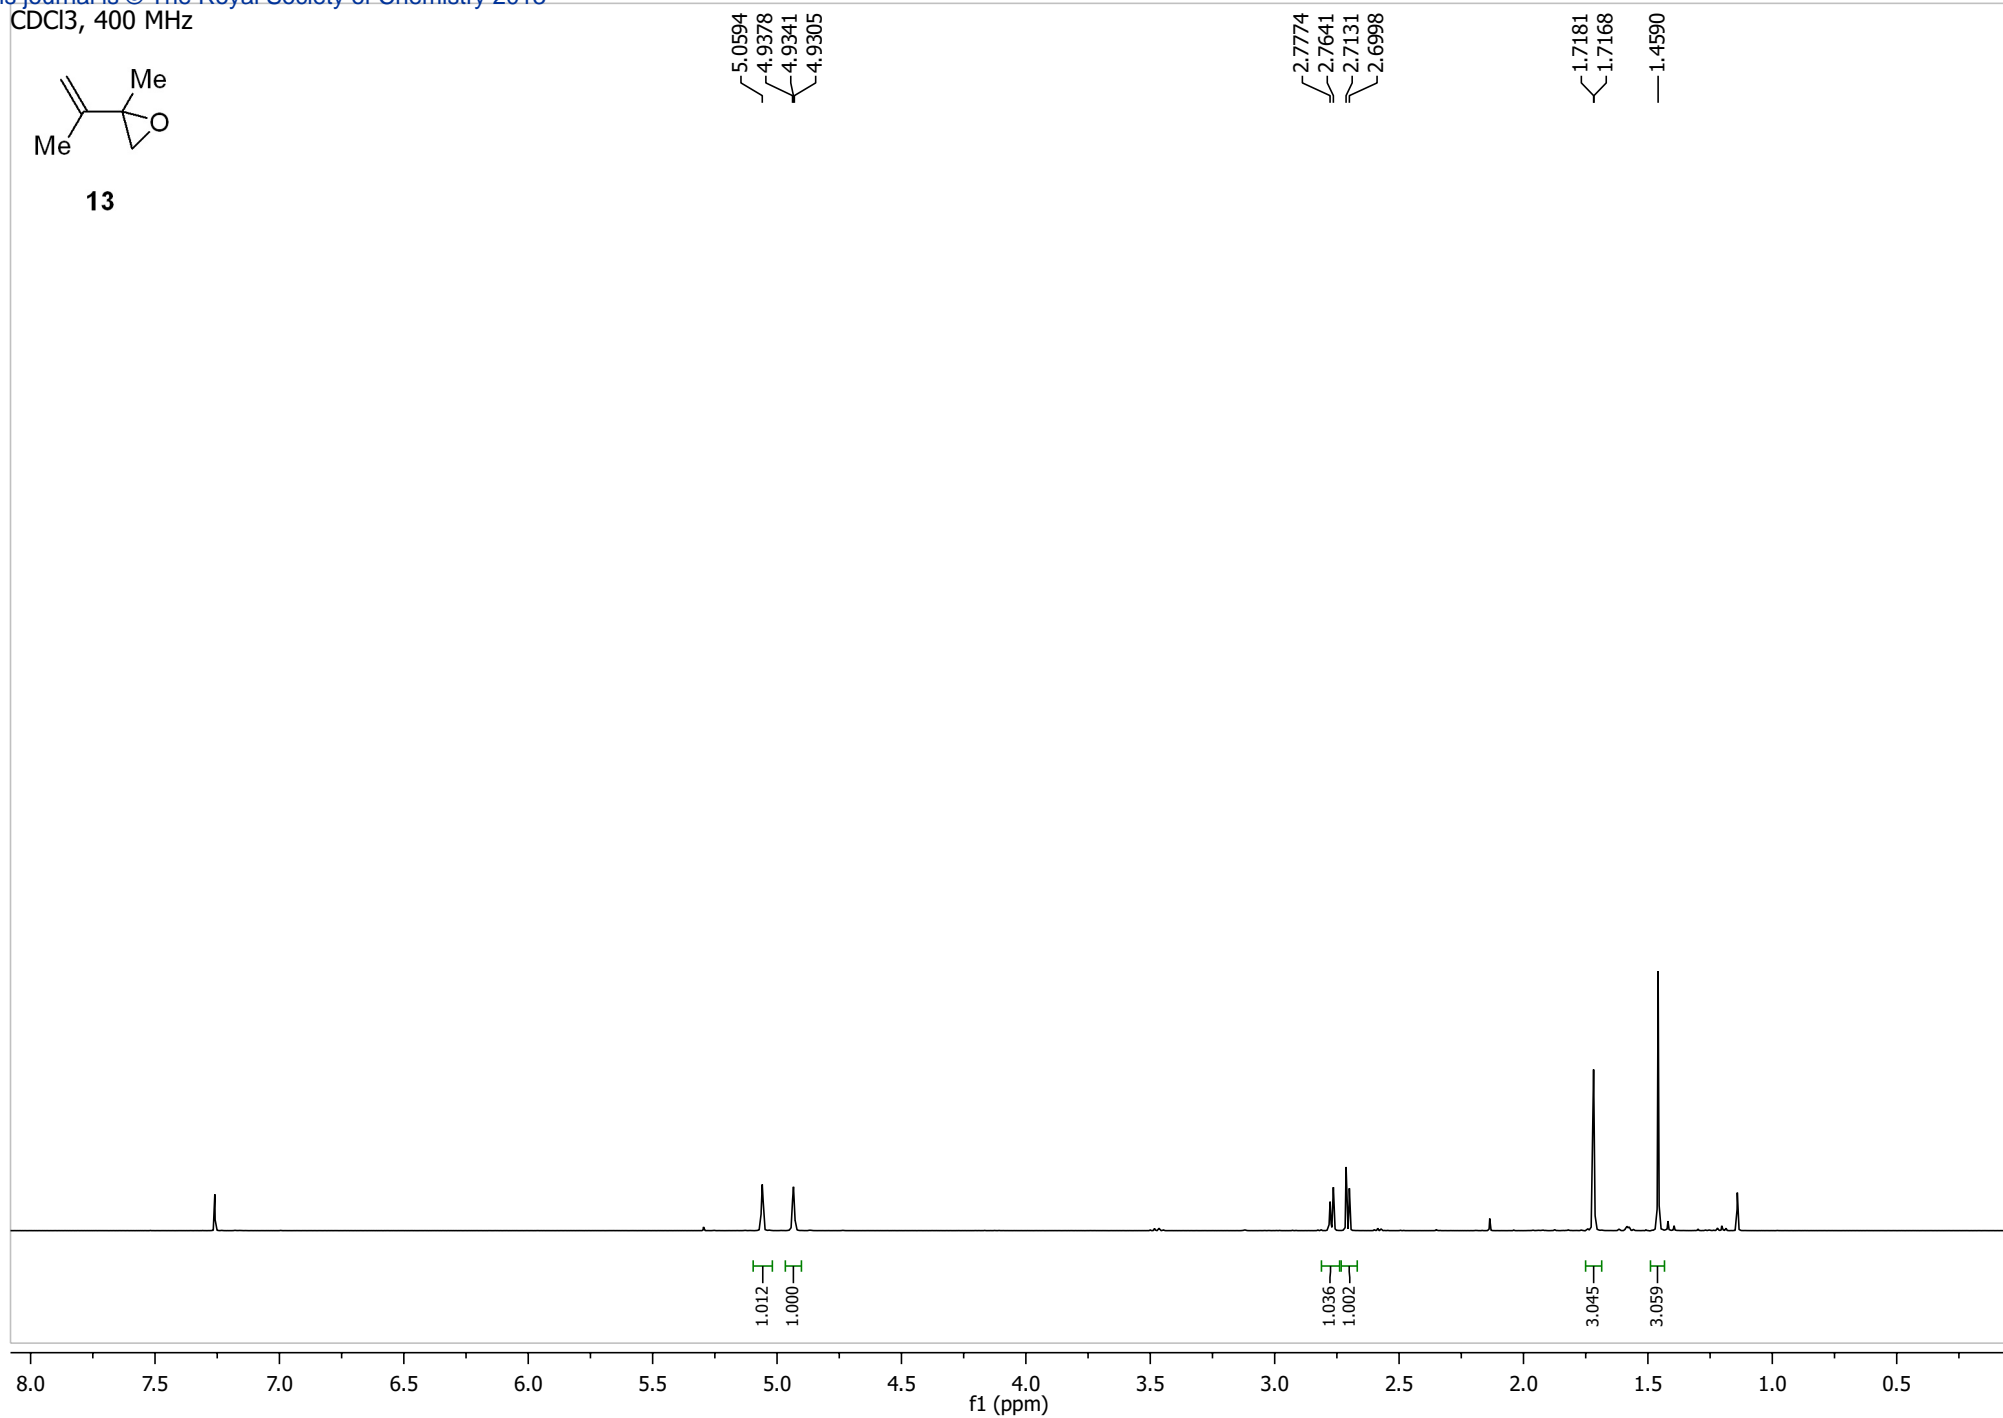

CDCl<sub>3</sub>, 101 MHz

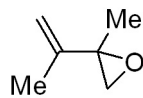

**13**

— 144.7985

— 112.6811

— 58.1058

— 54.1785

— 20.7044

— 18.6010

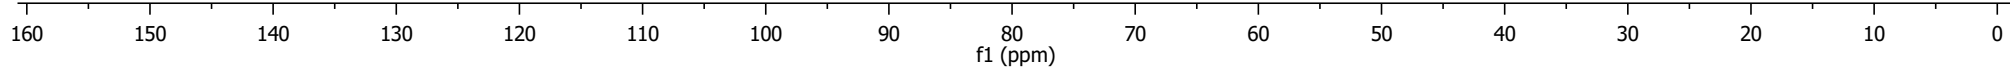

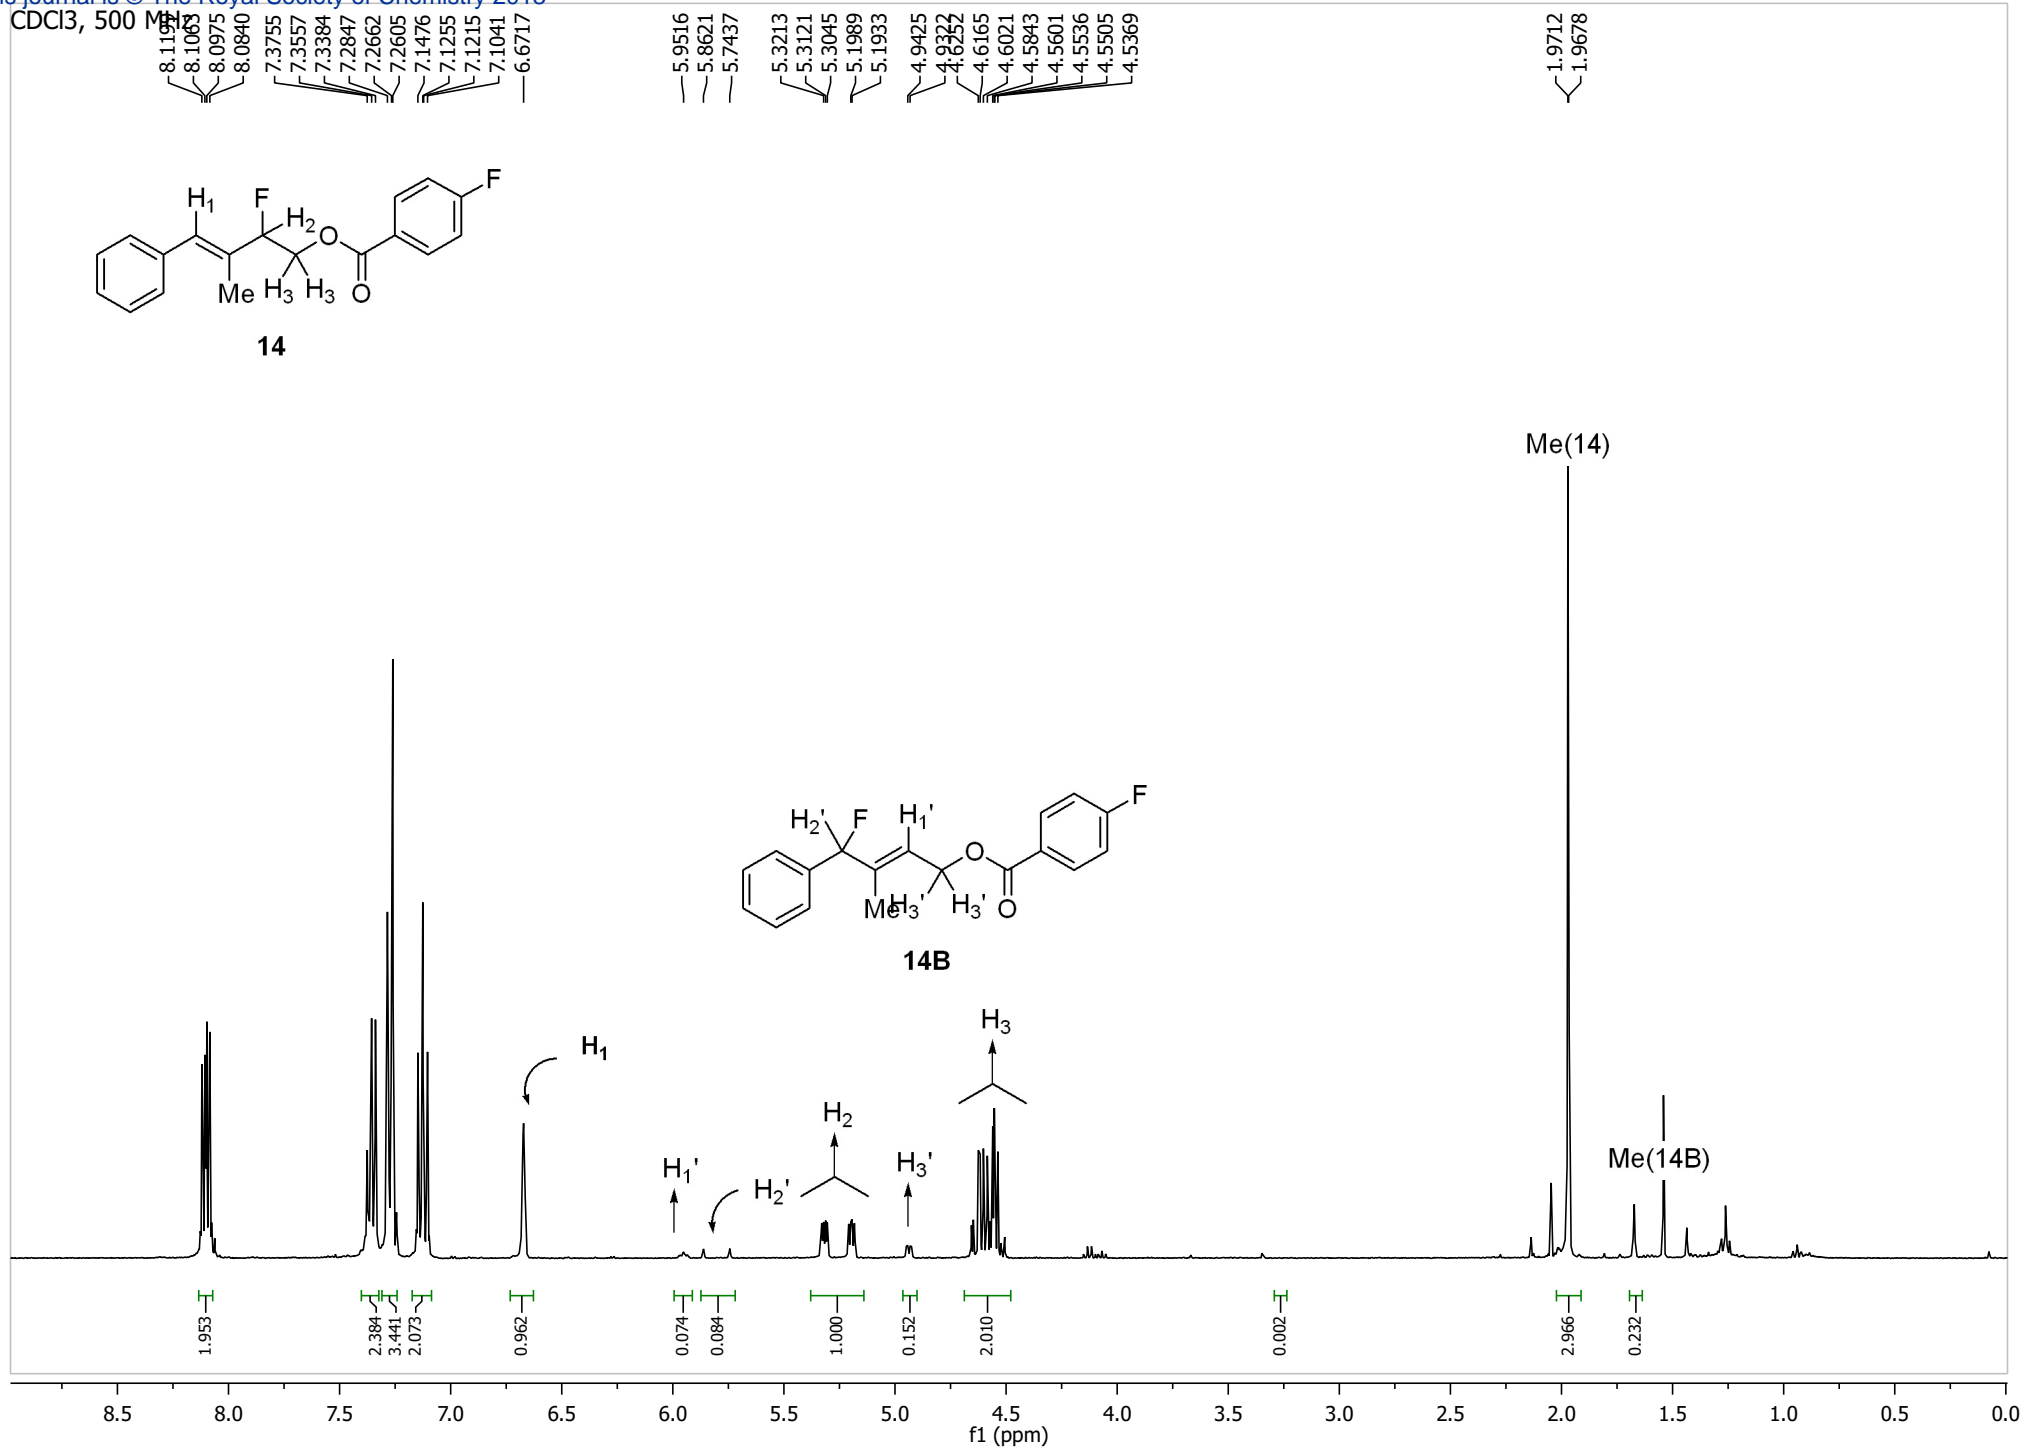

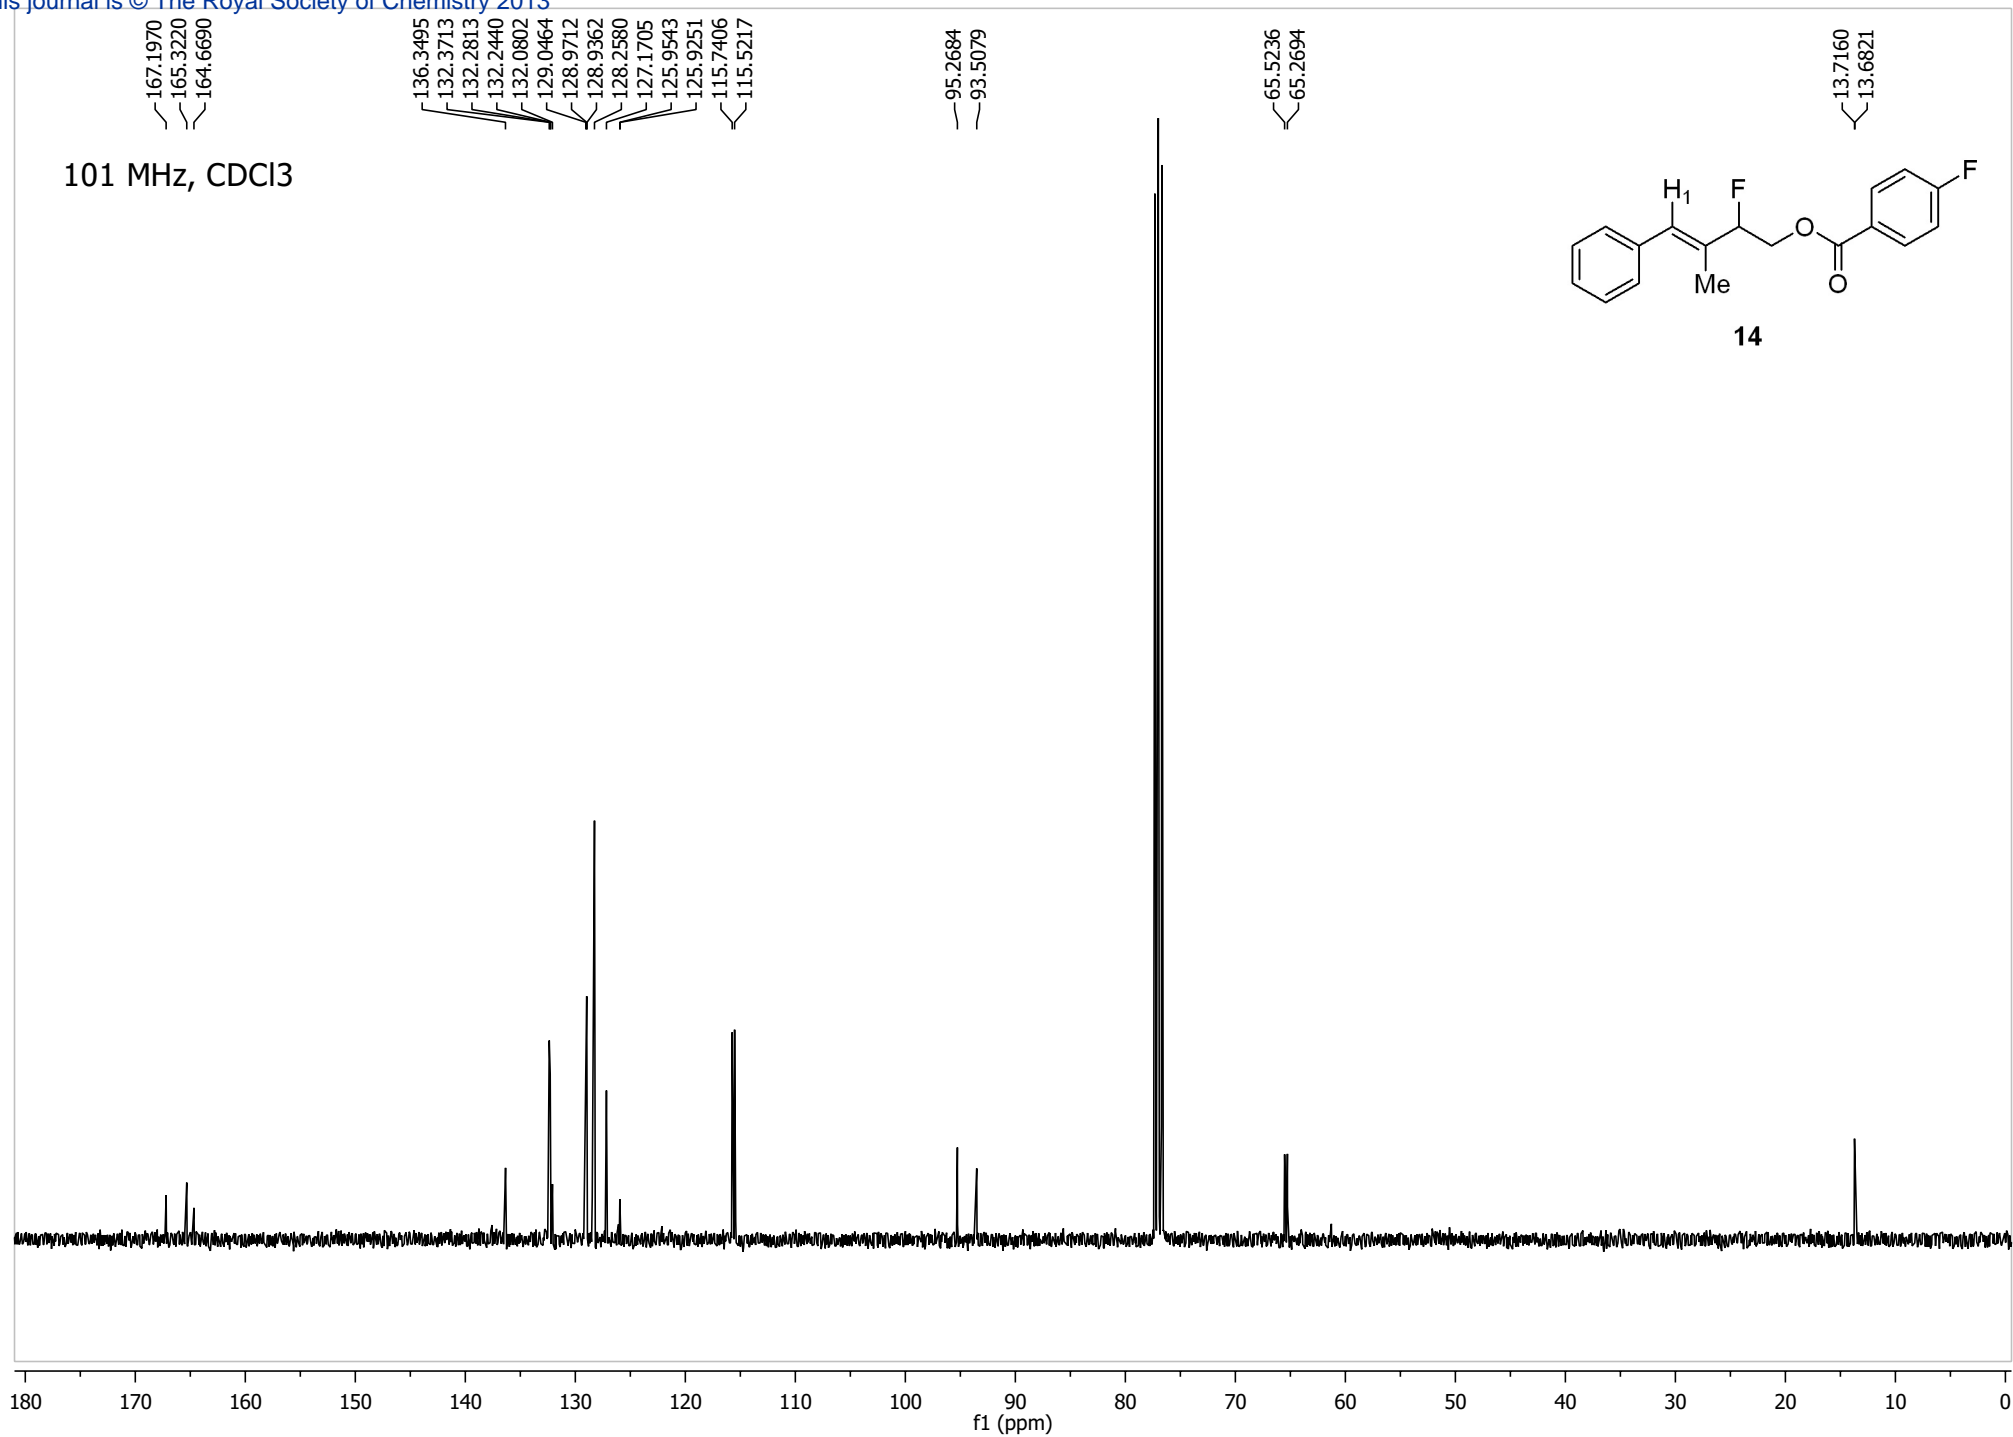

CDCl<sub>3</sub>, 282 MHz

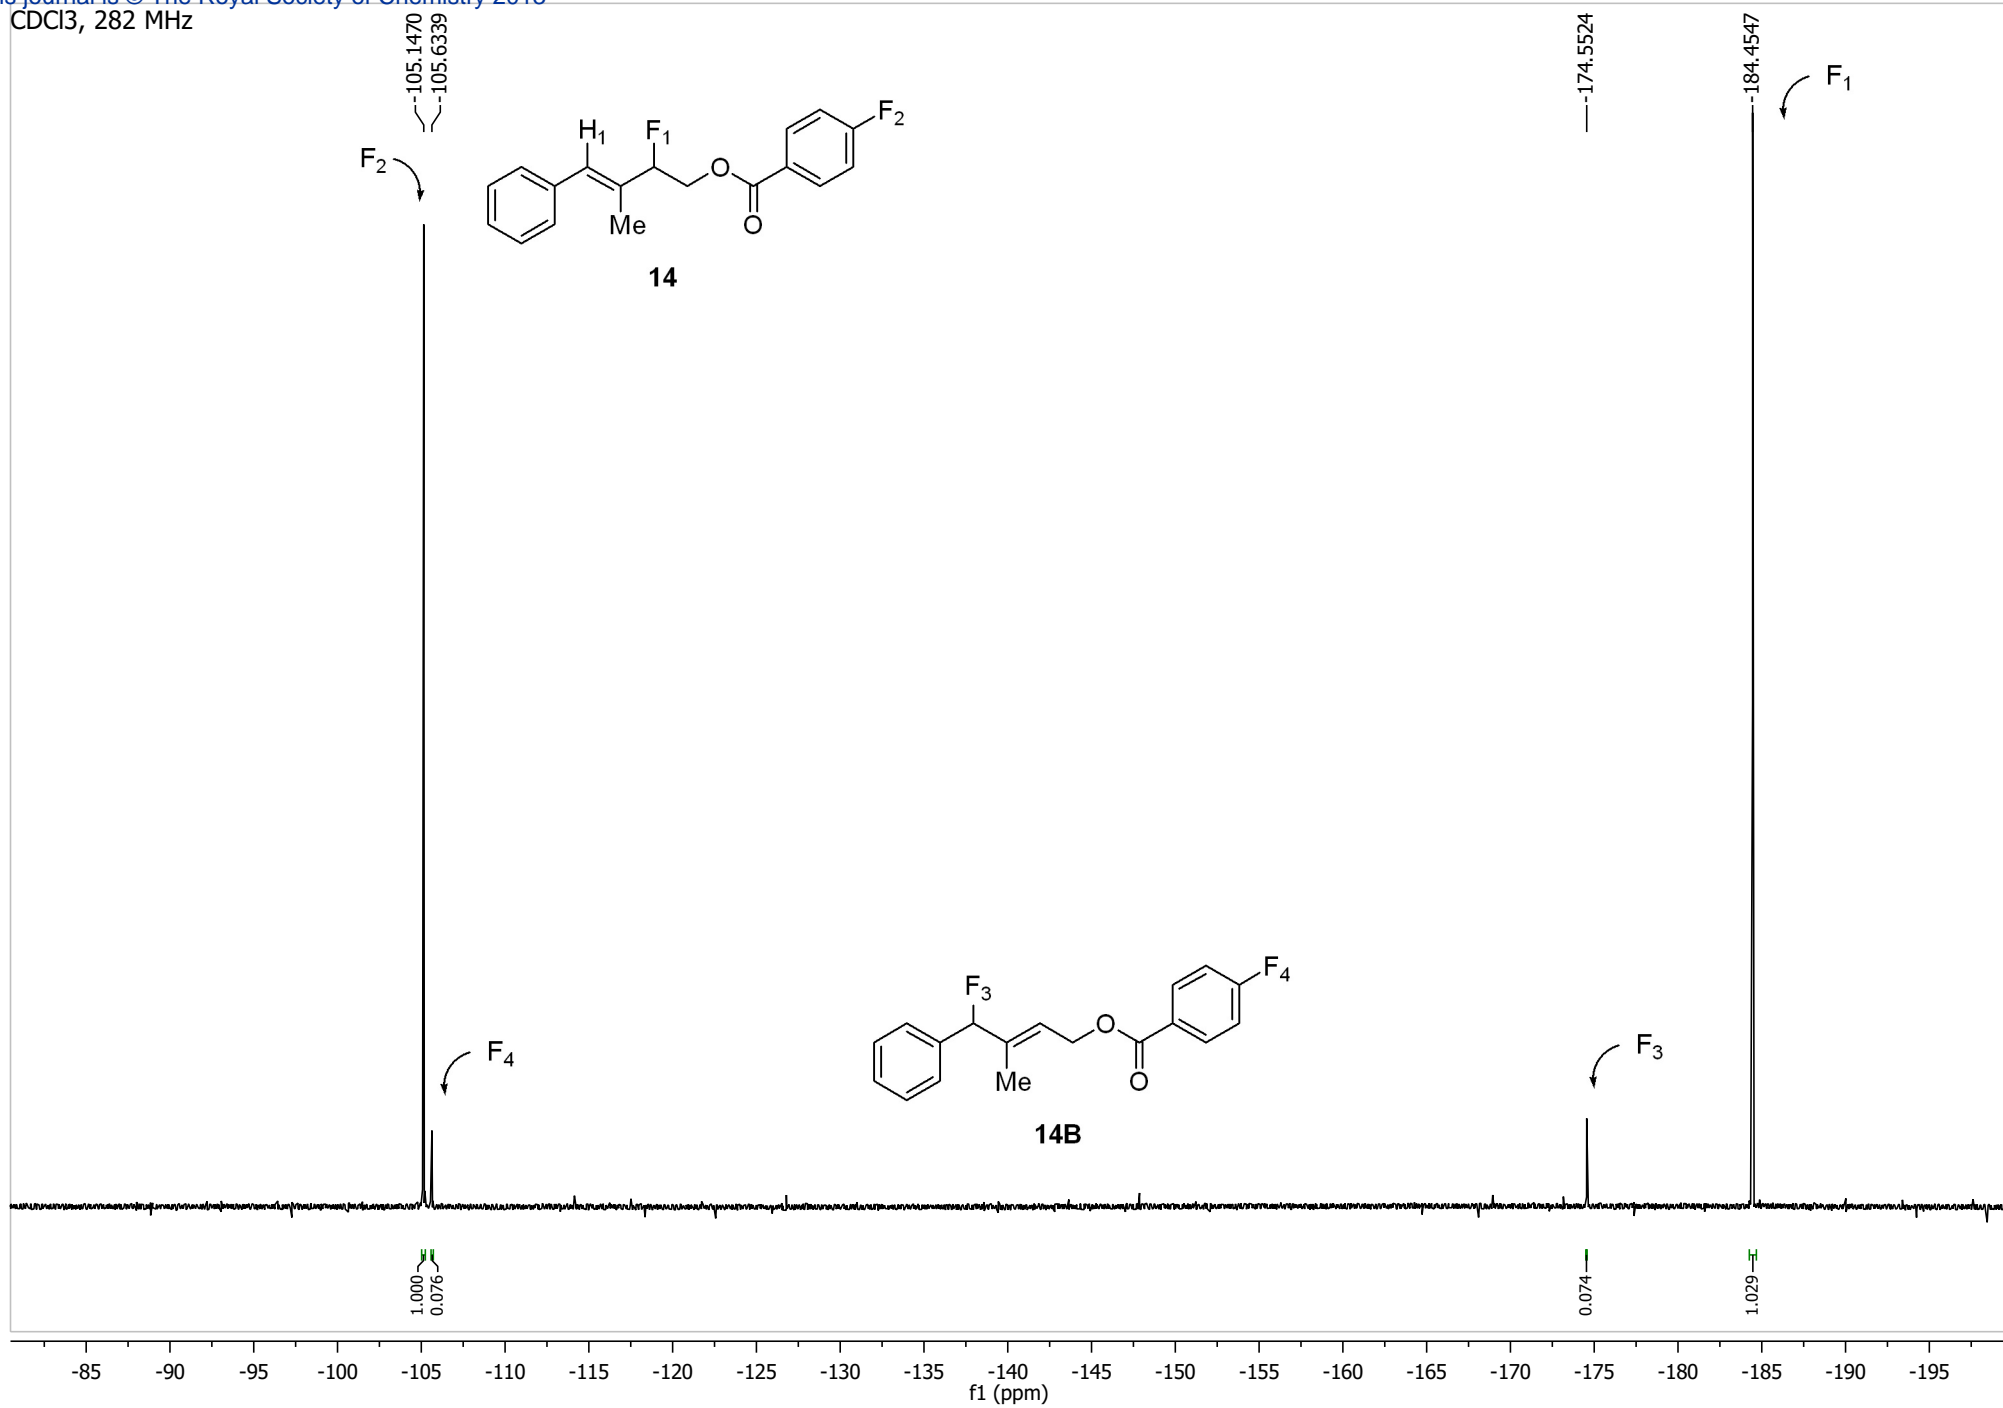



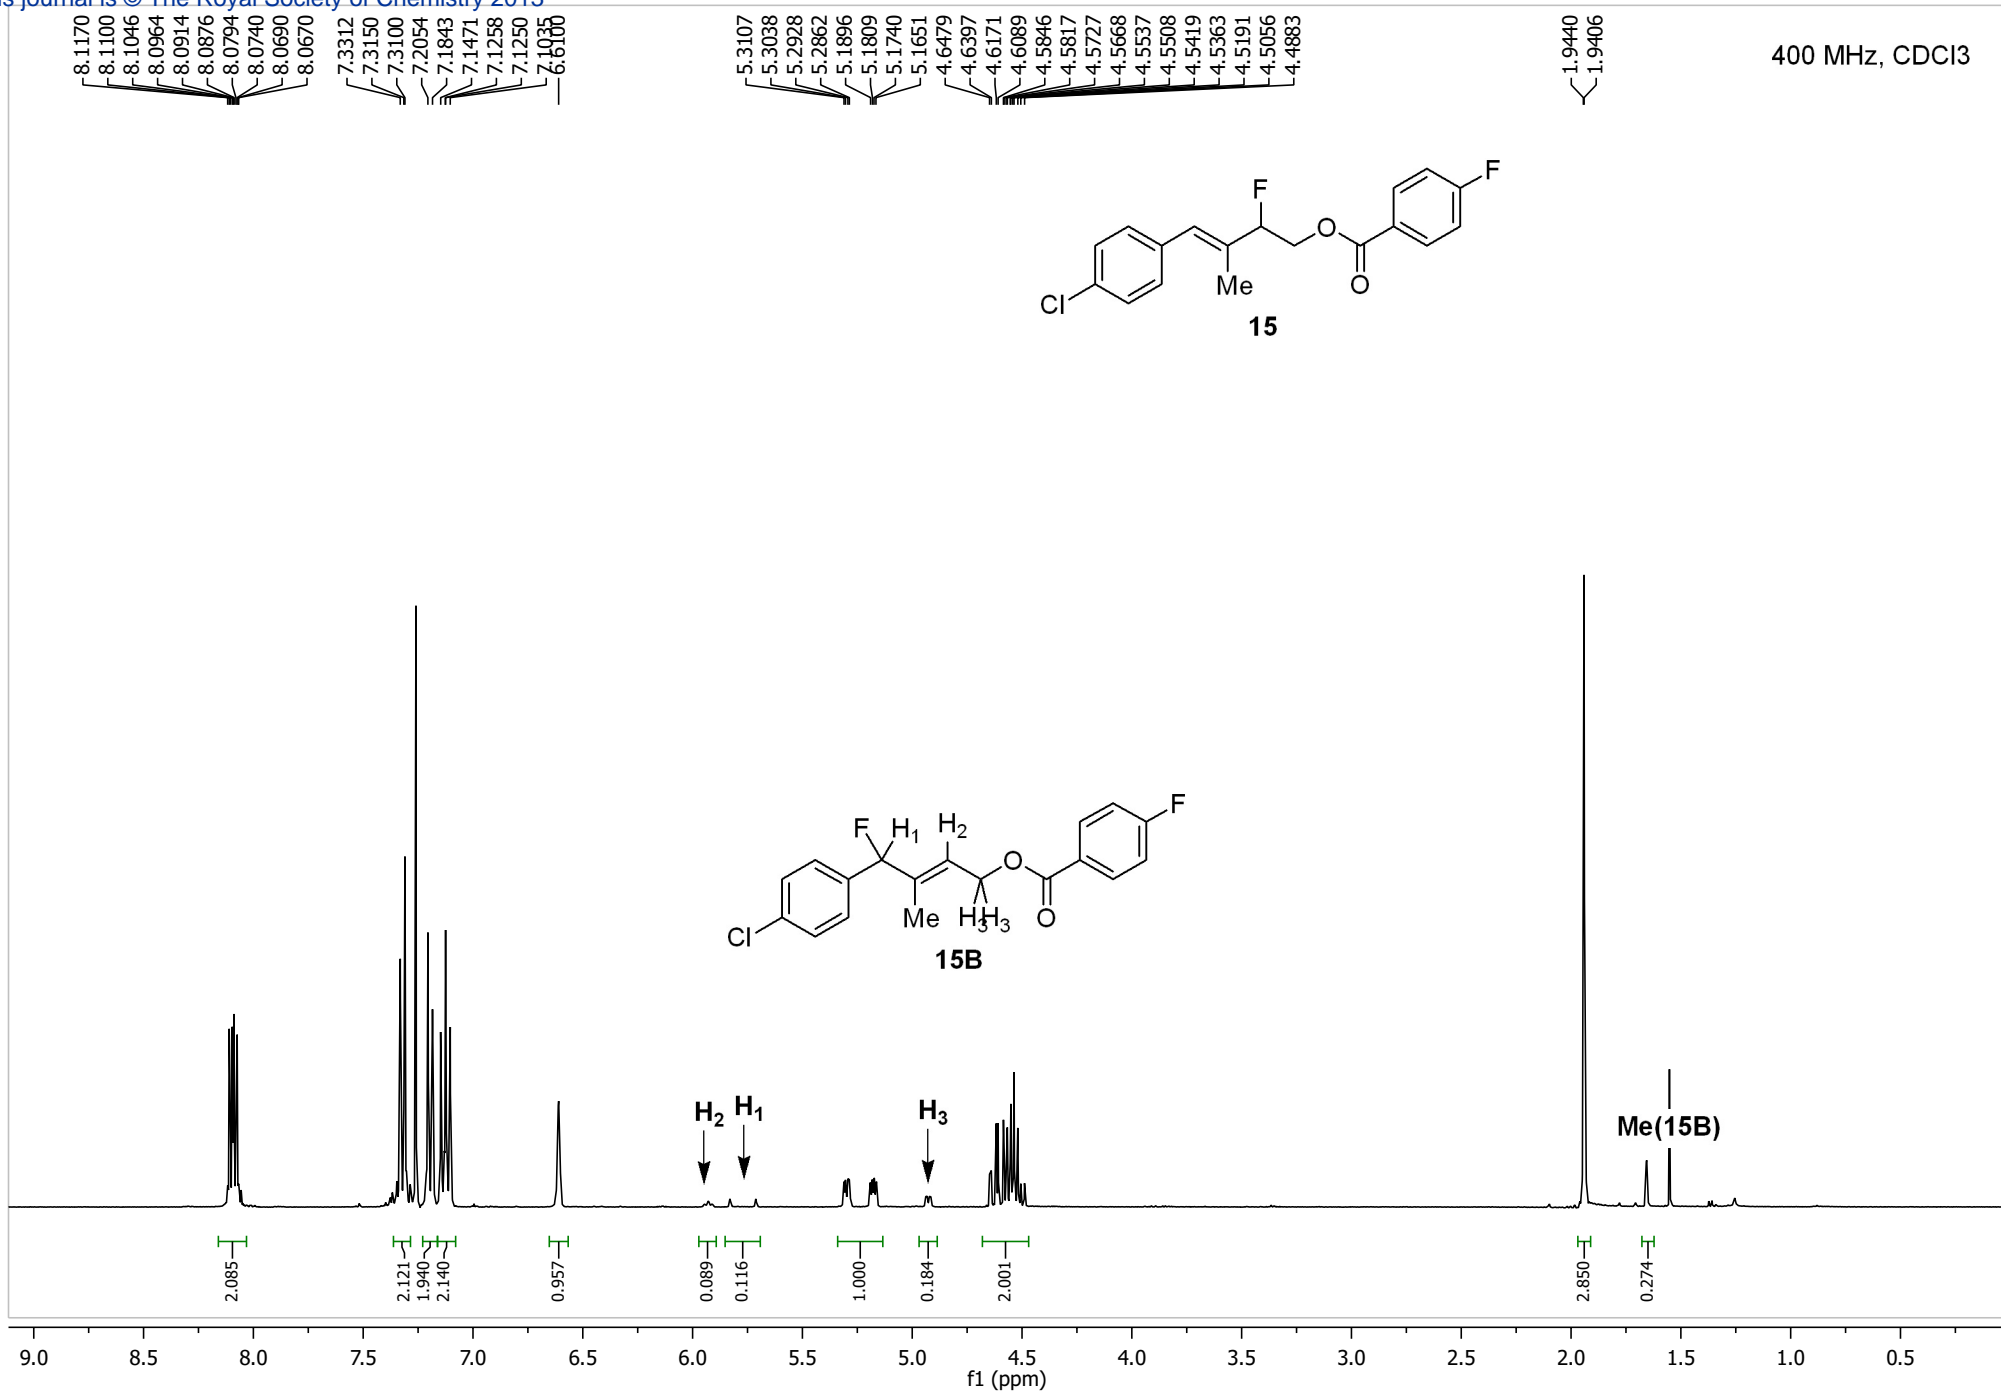

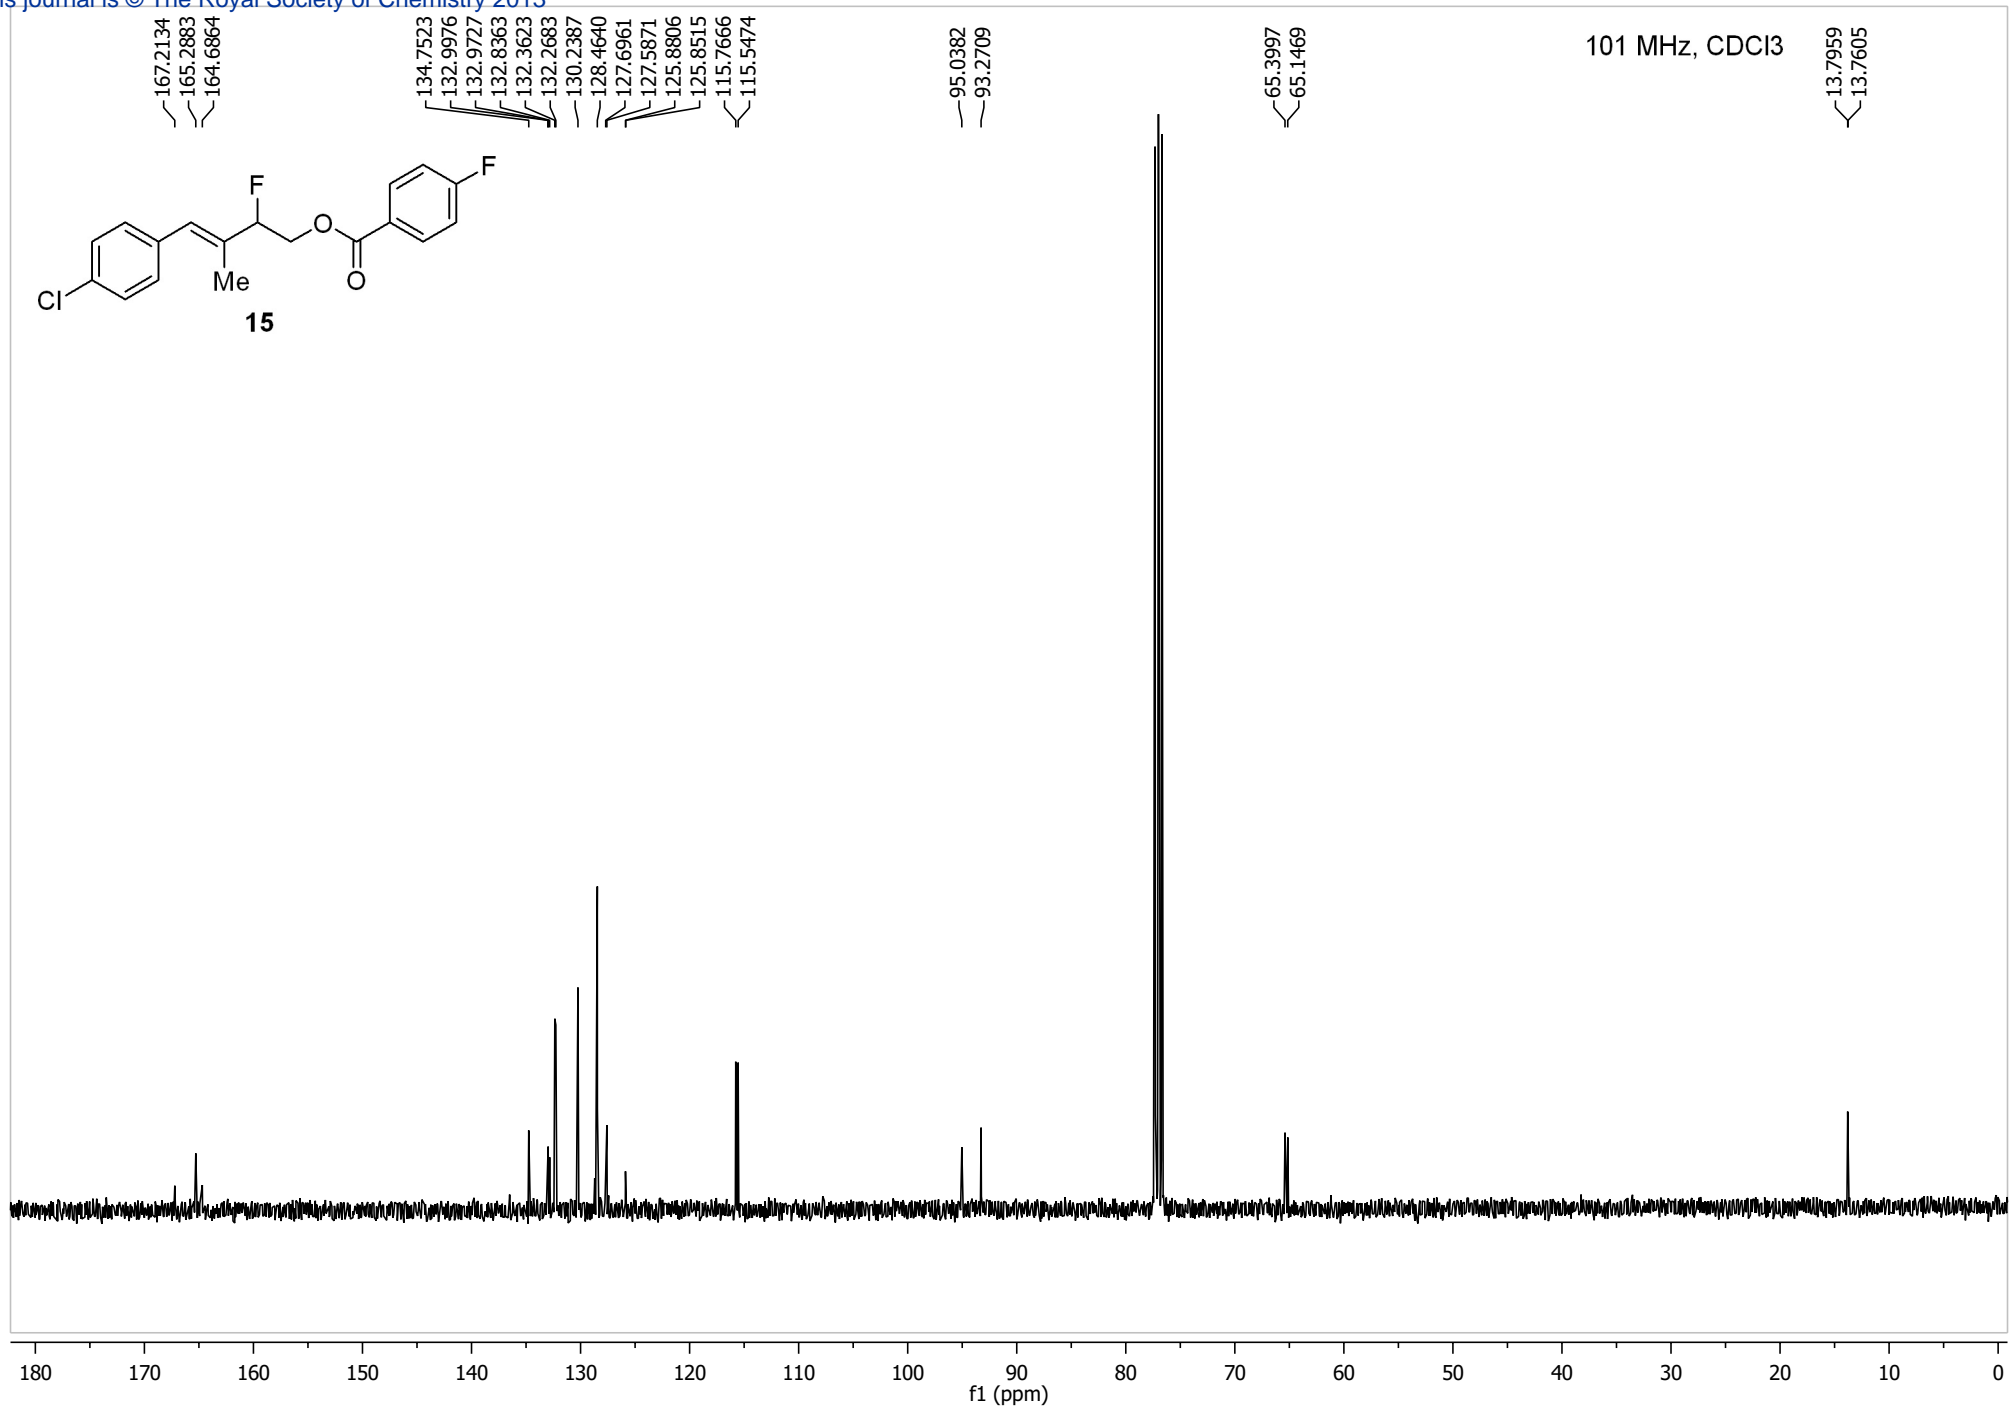

376 MHz, CDCl<sub>3</sub>

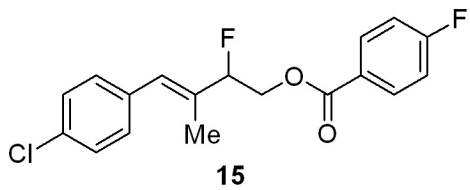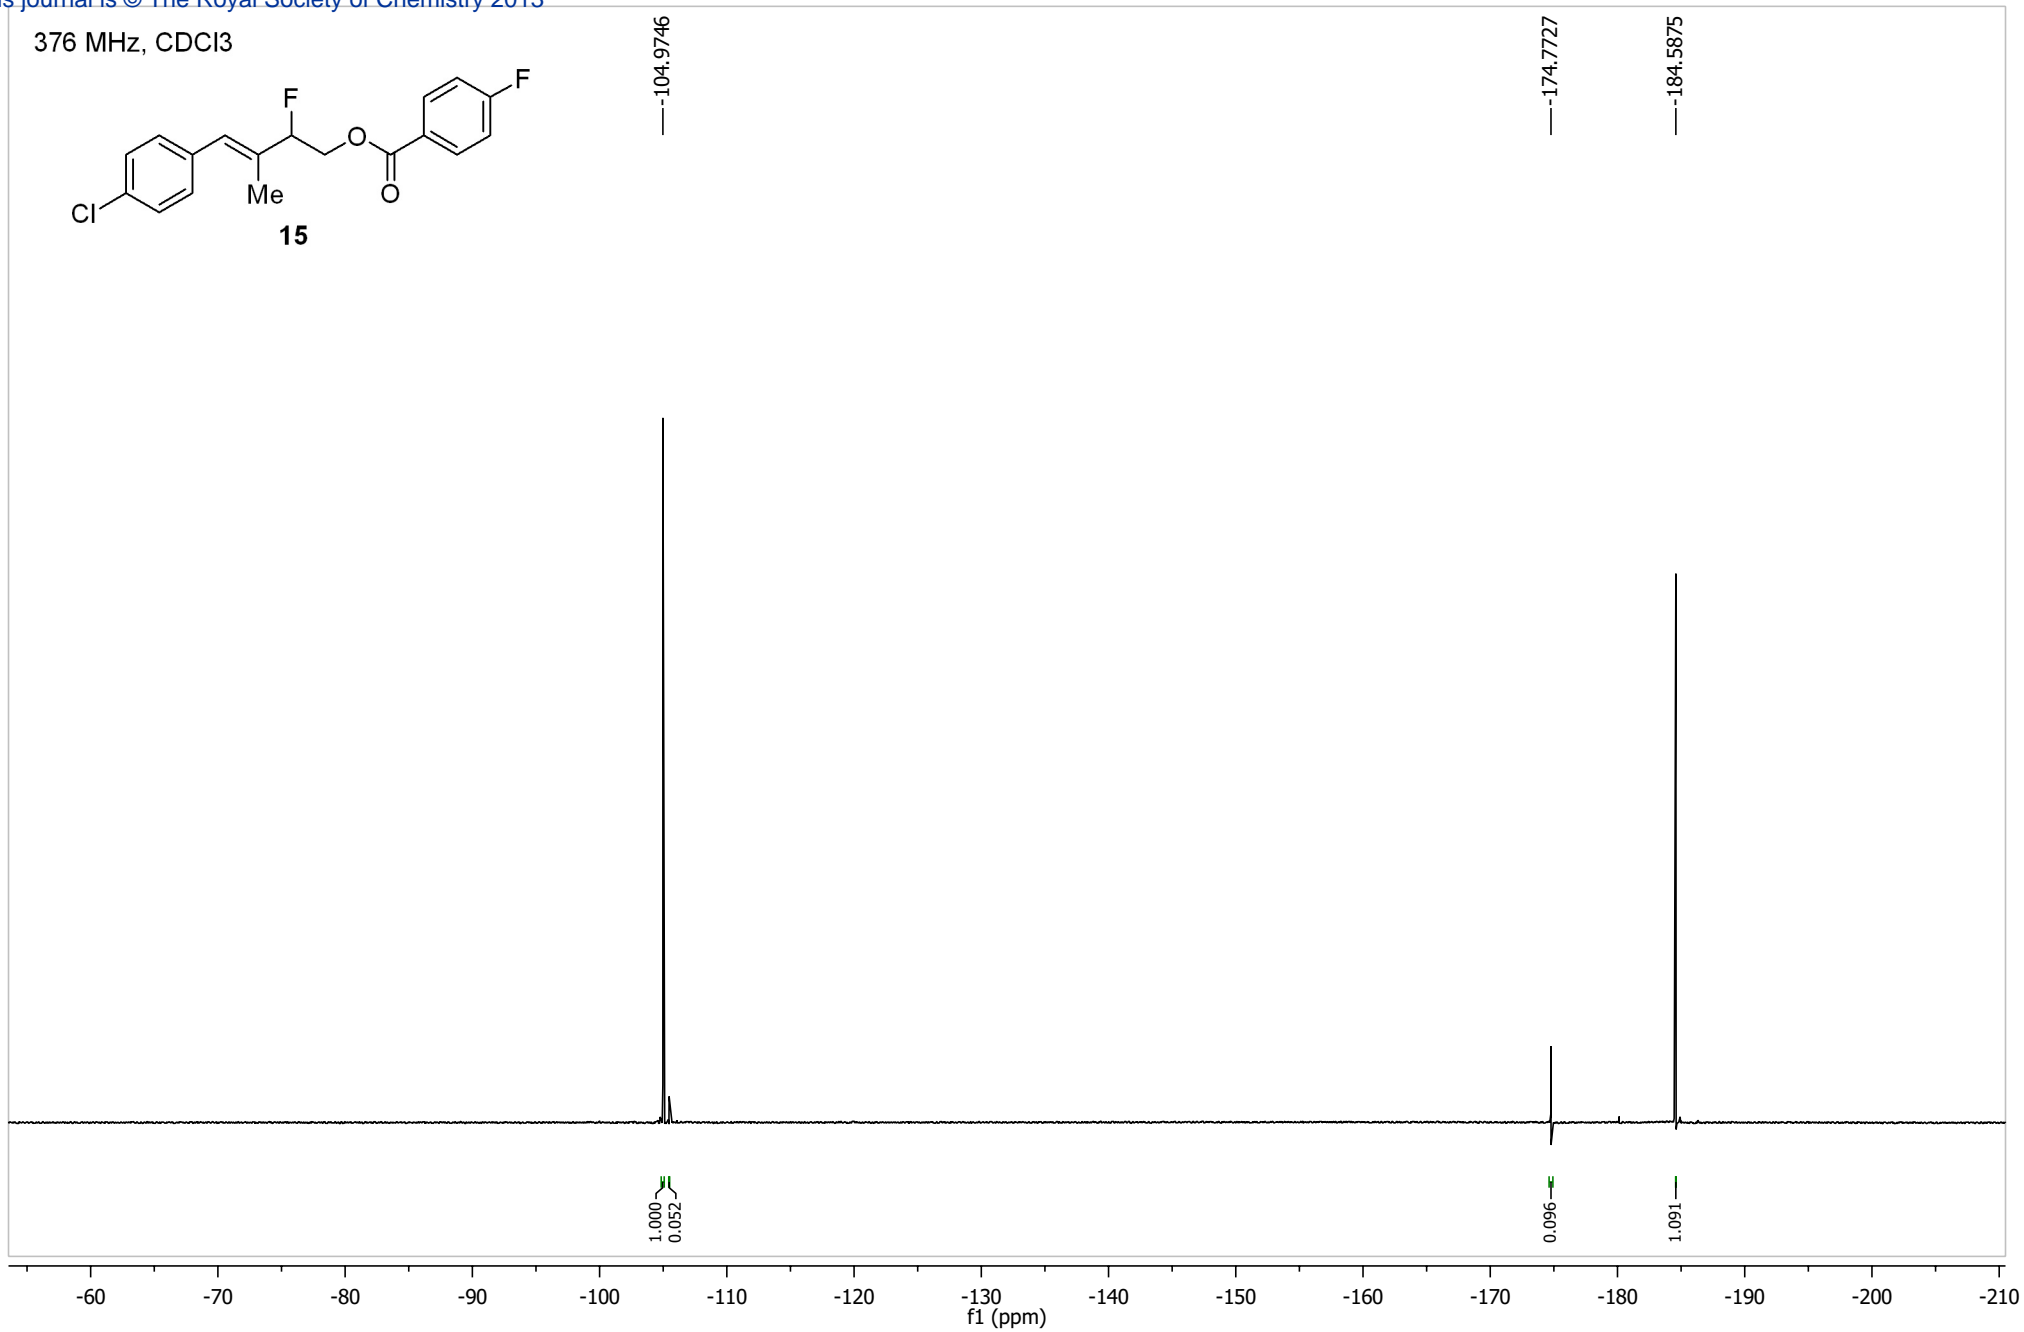

CDCl<sub>3</sub>, 500 MHz

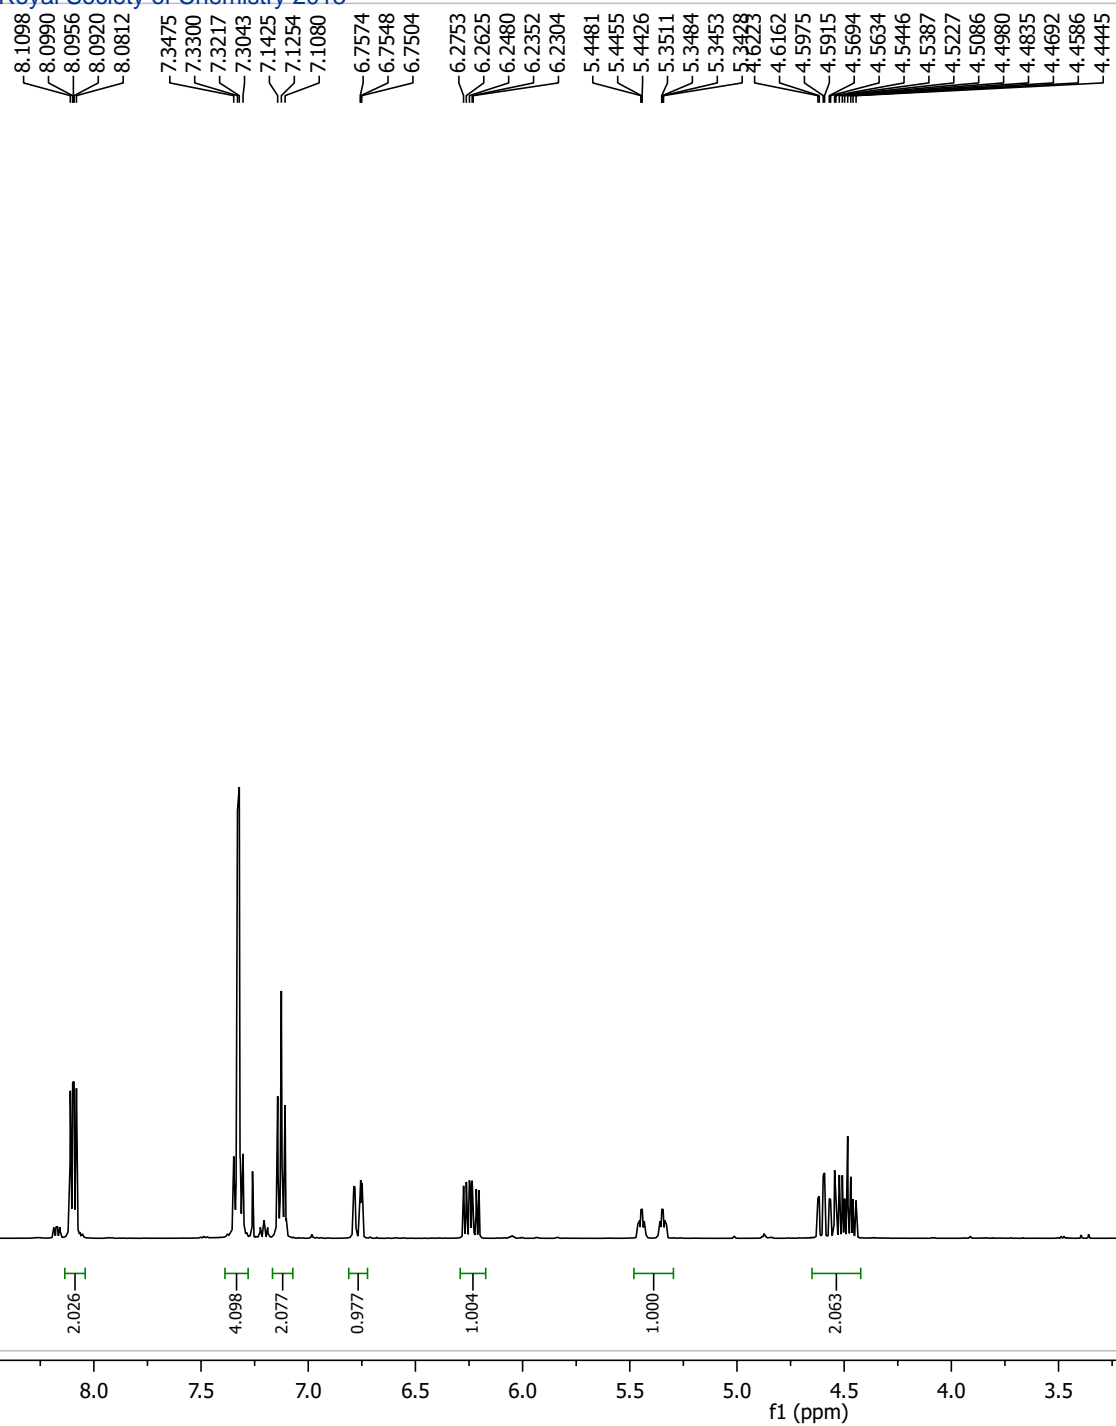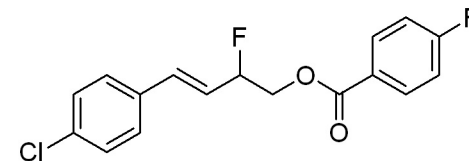

**16**

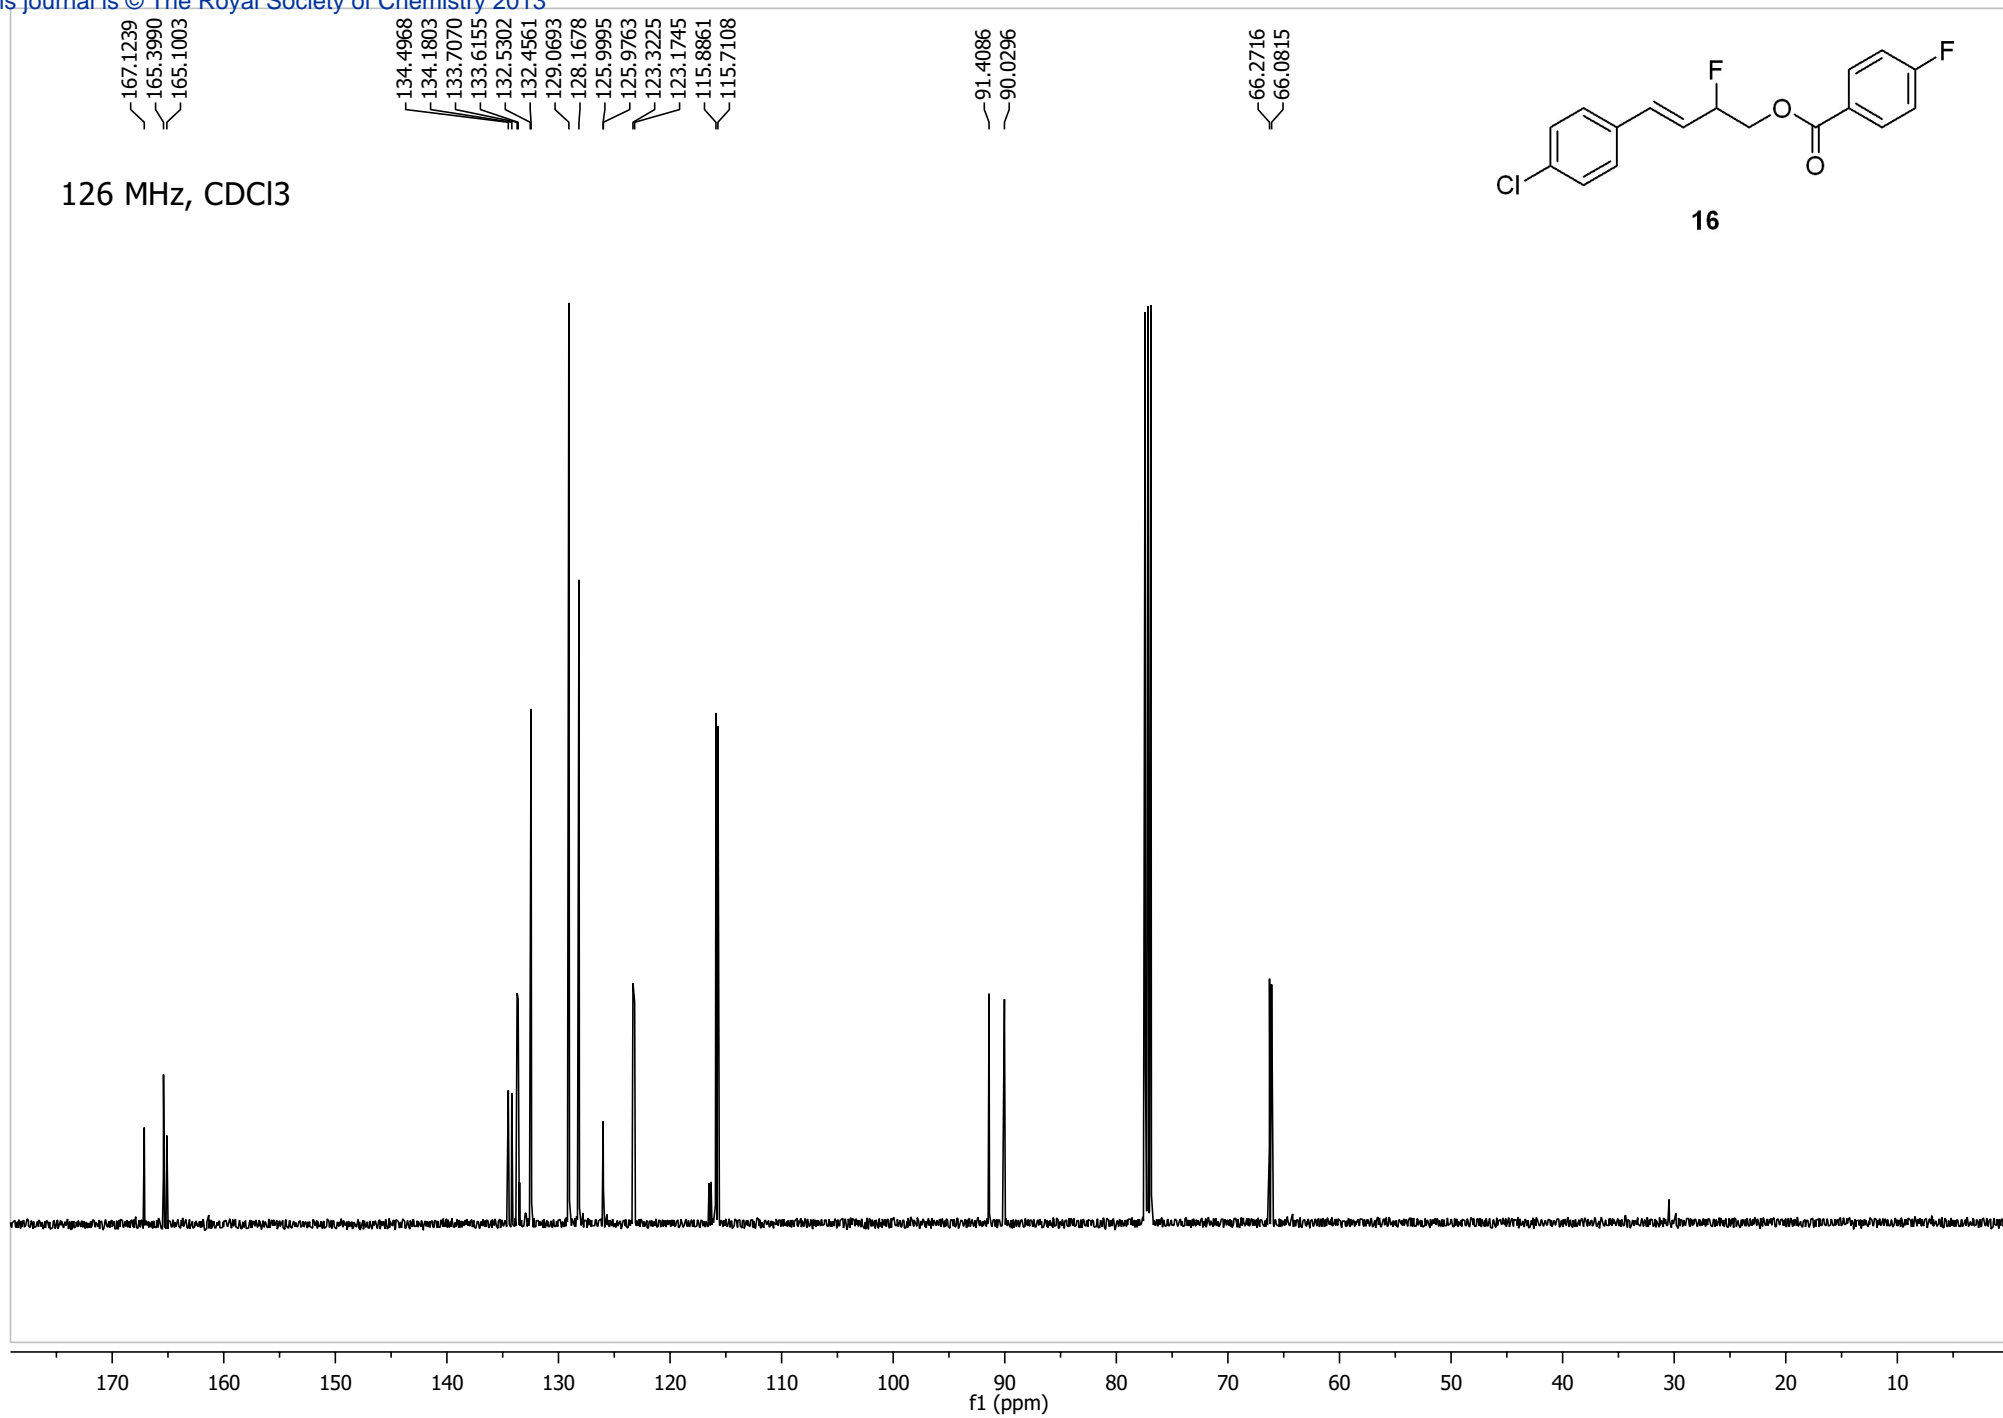

CDCl<sub>3</sub>, 471 MHz

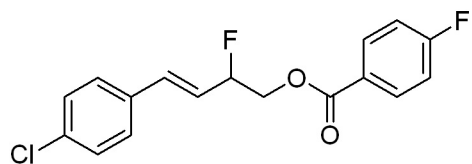

16

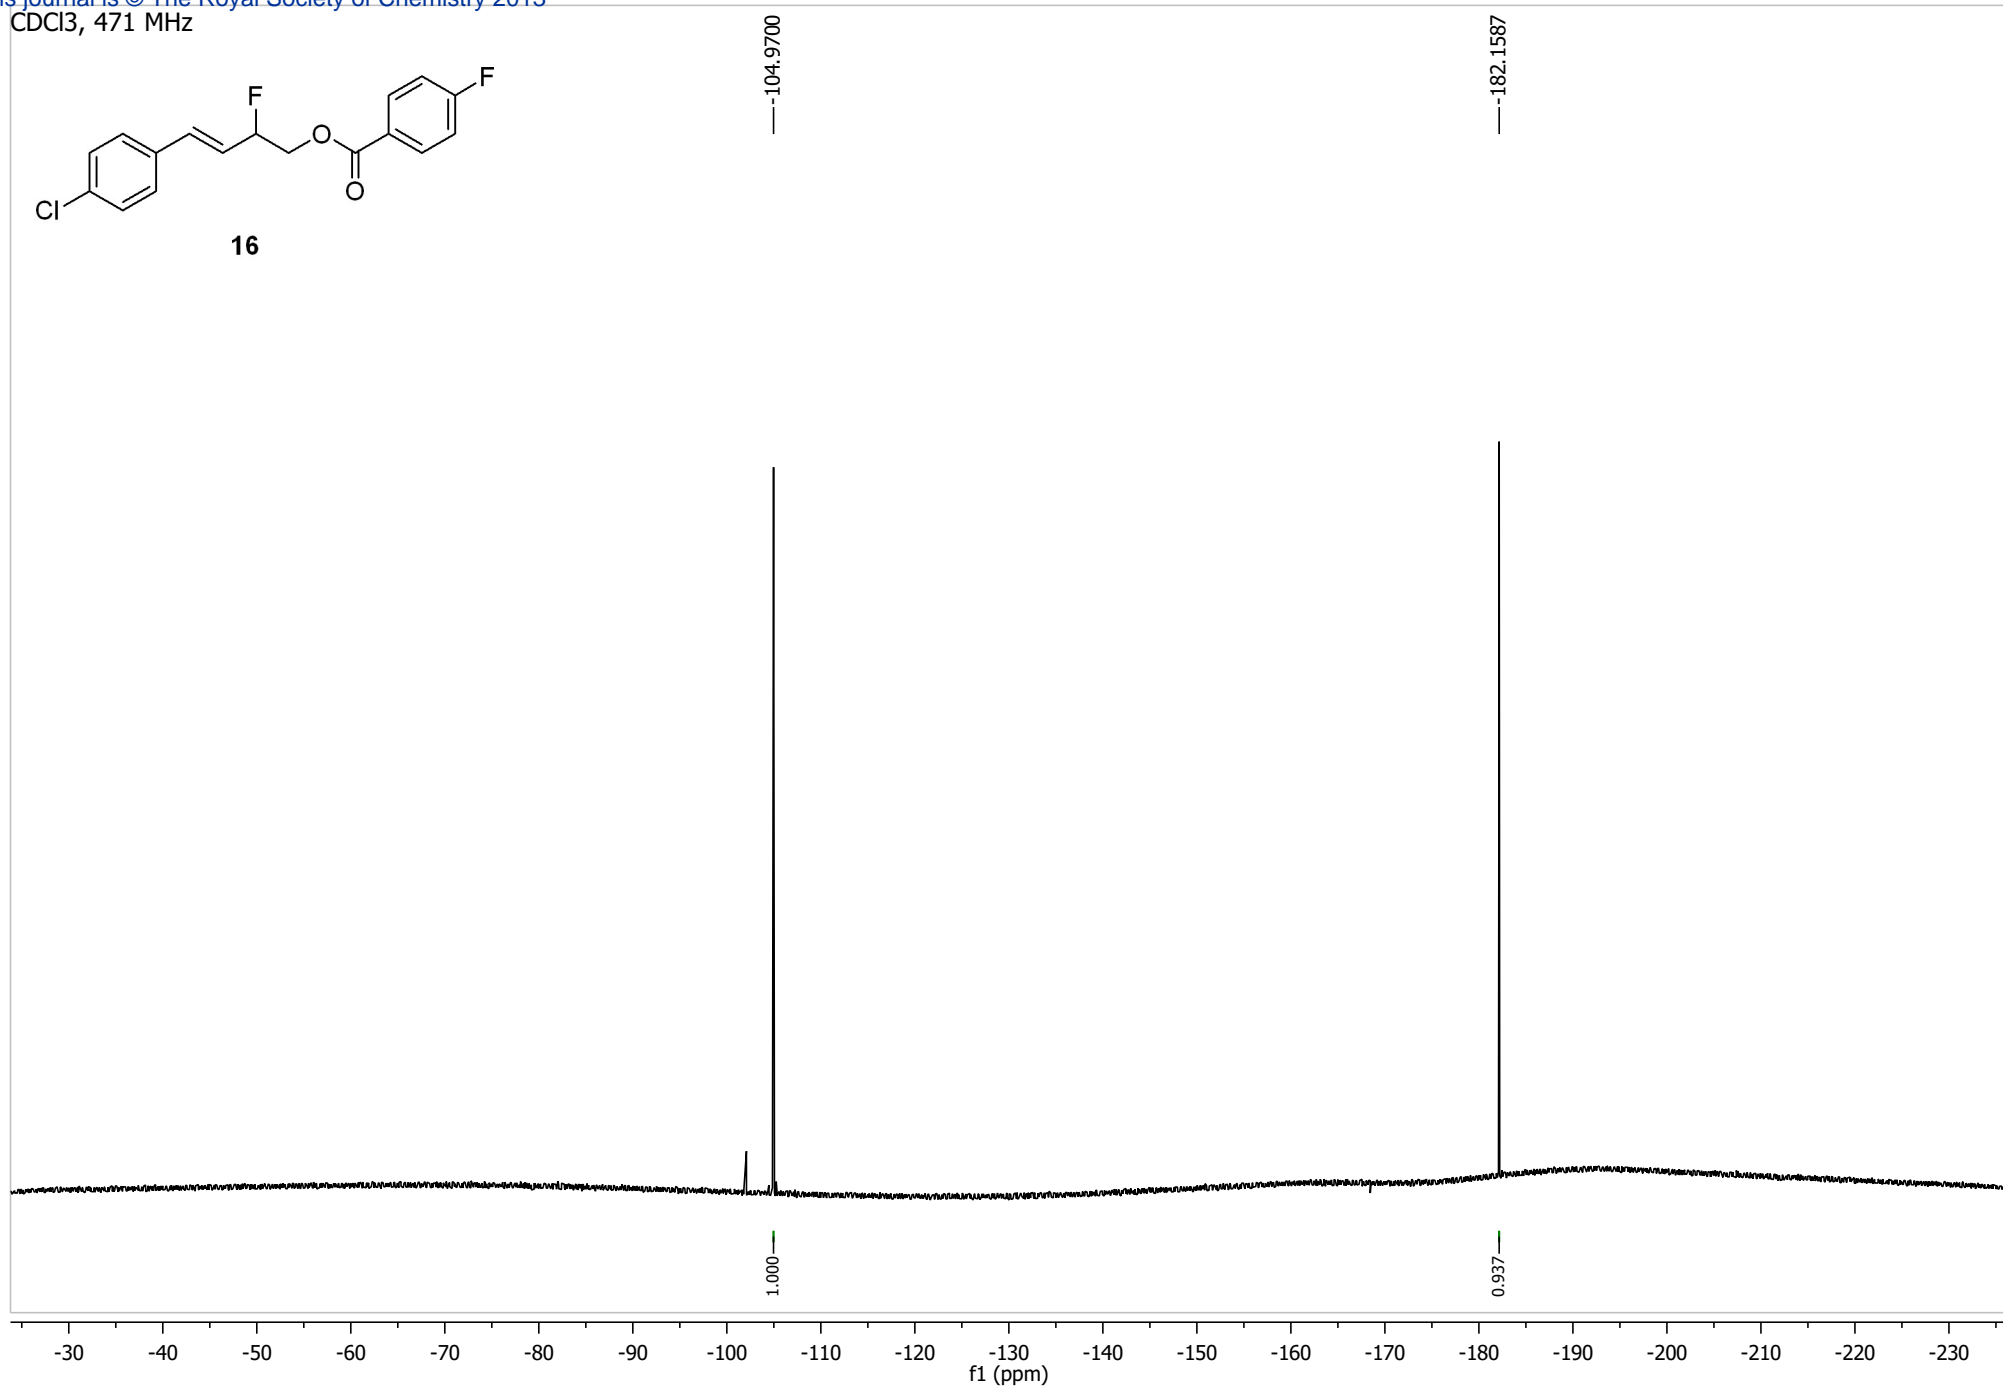

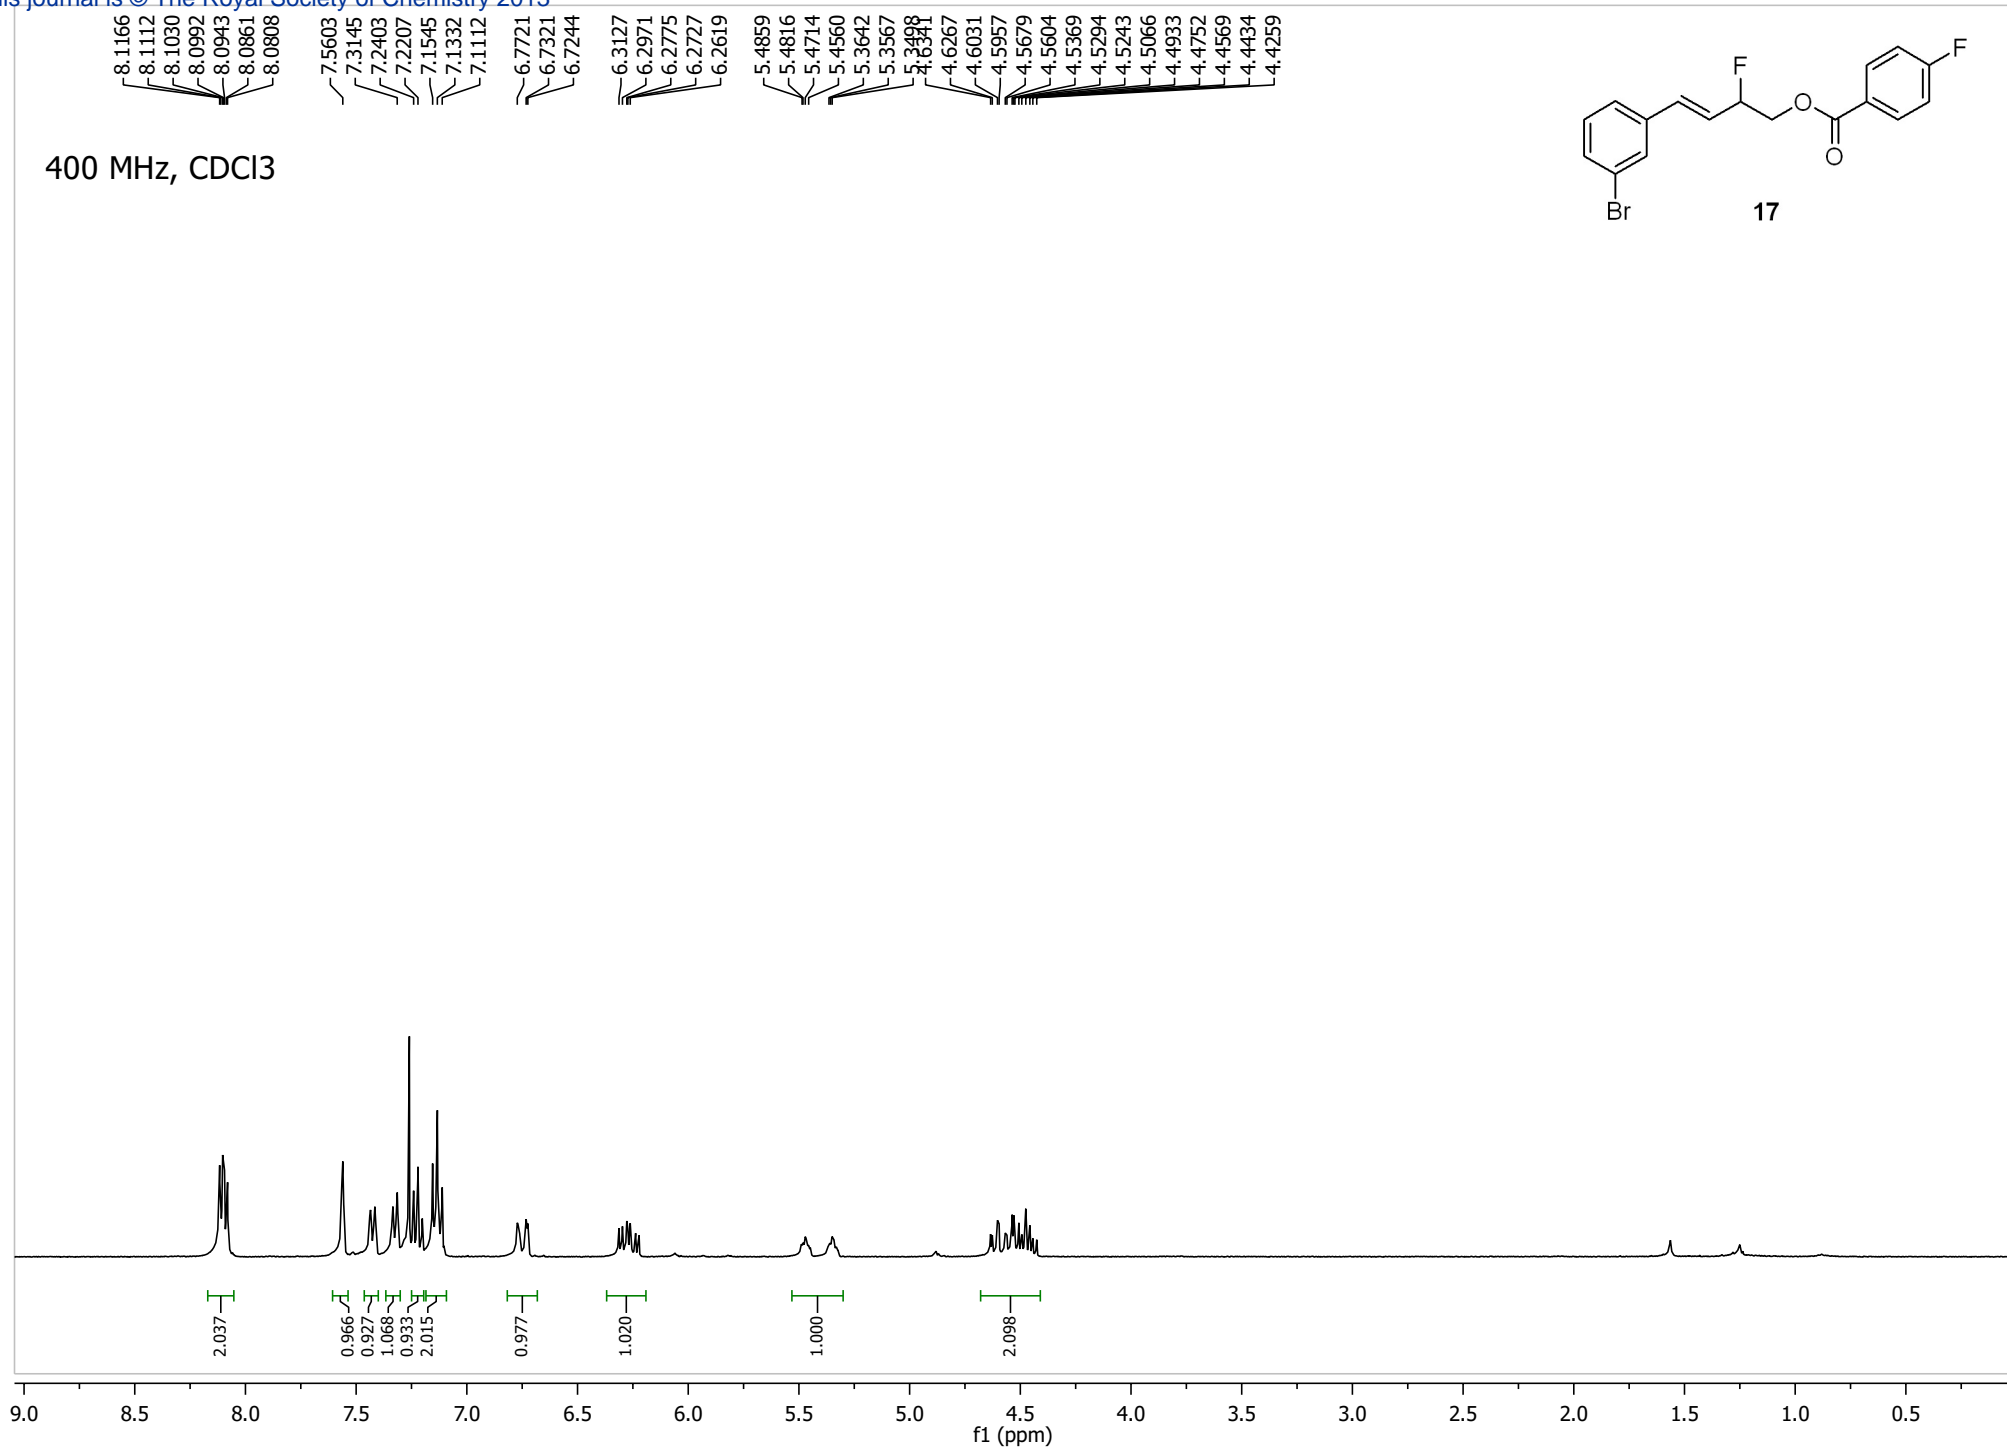

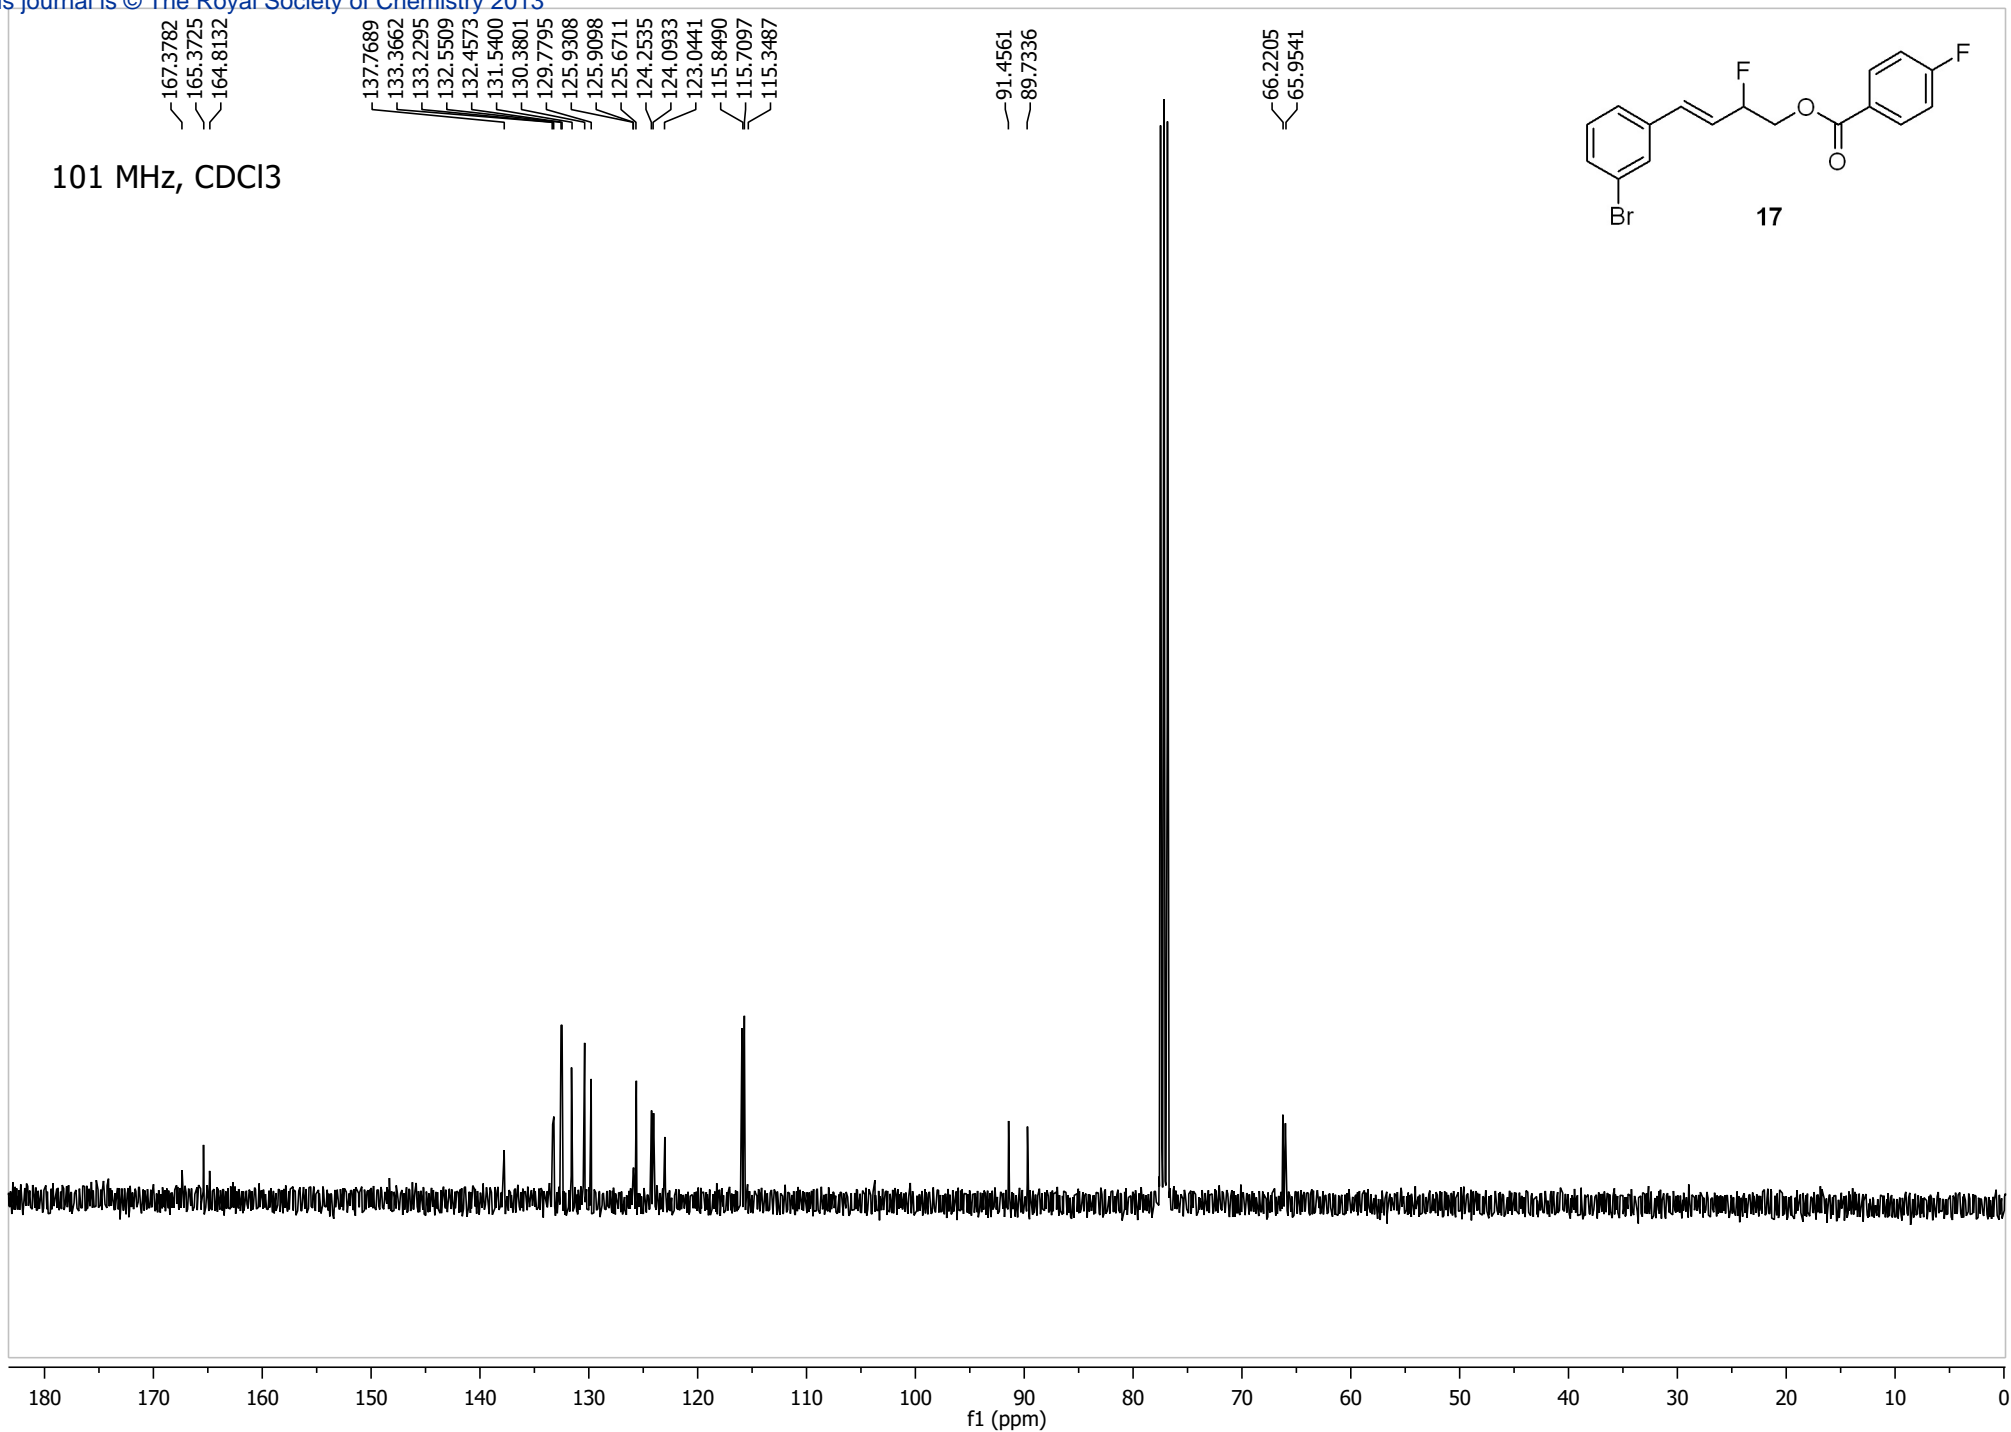



CDCl<sub>3</sub>, 282 MHz

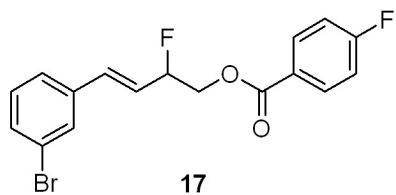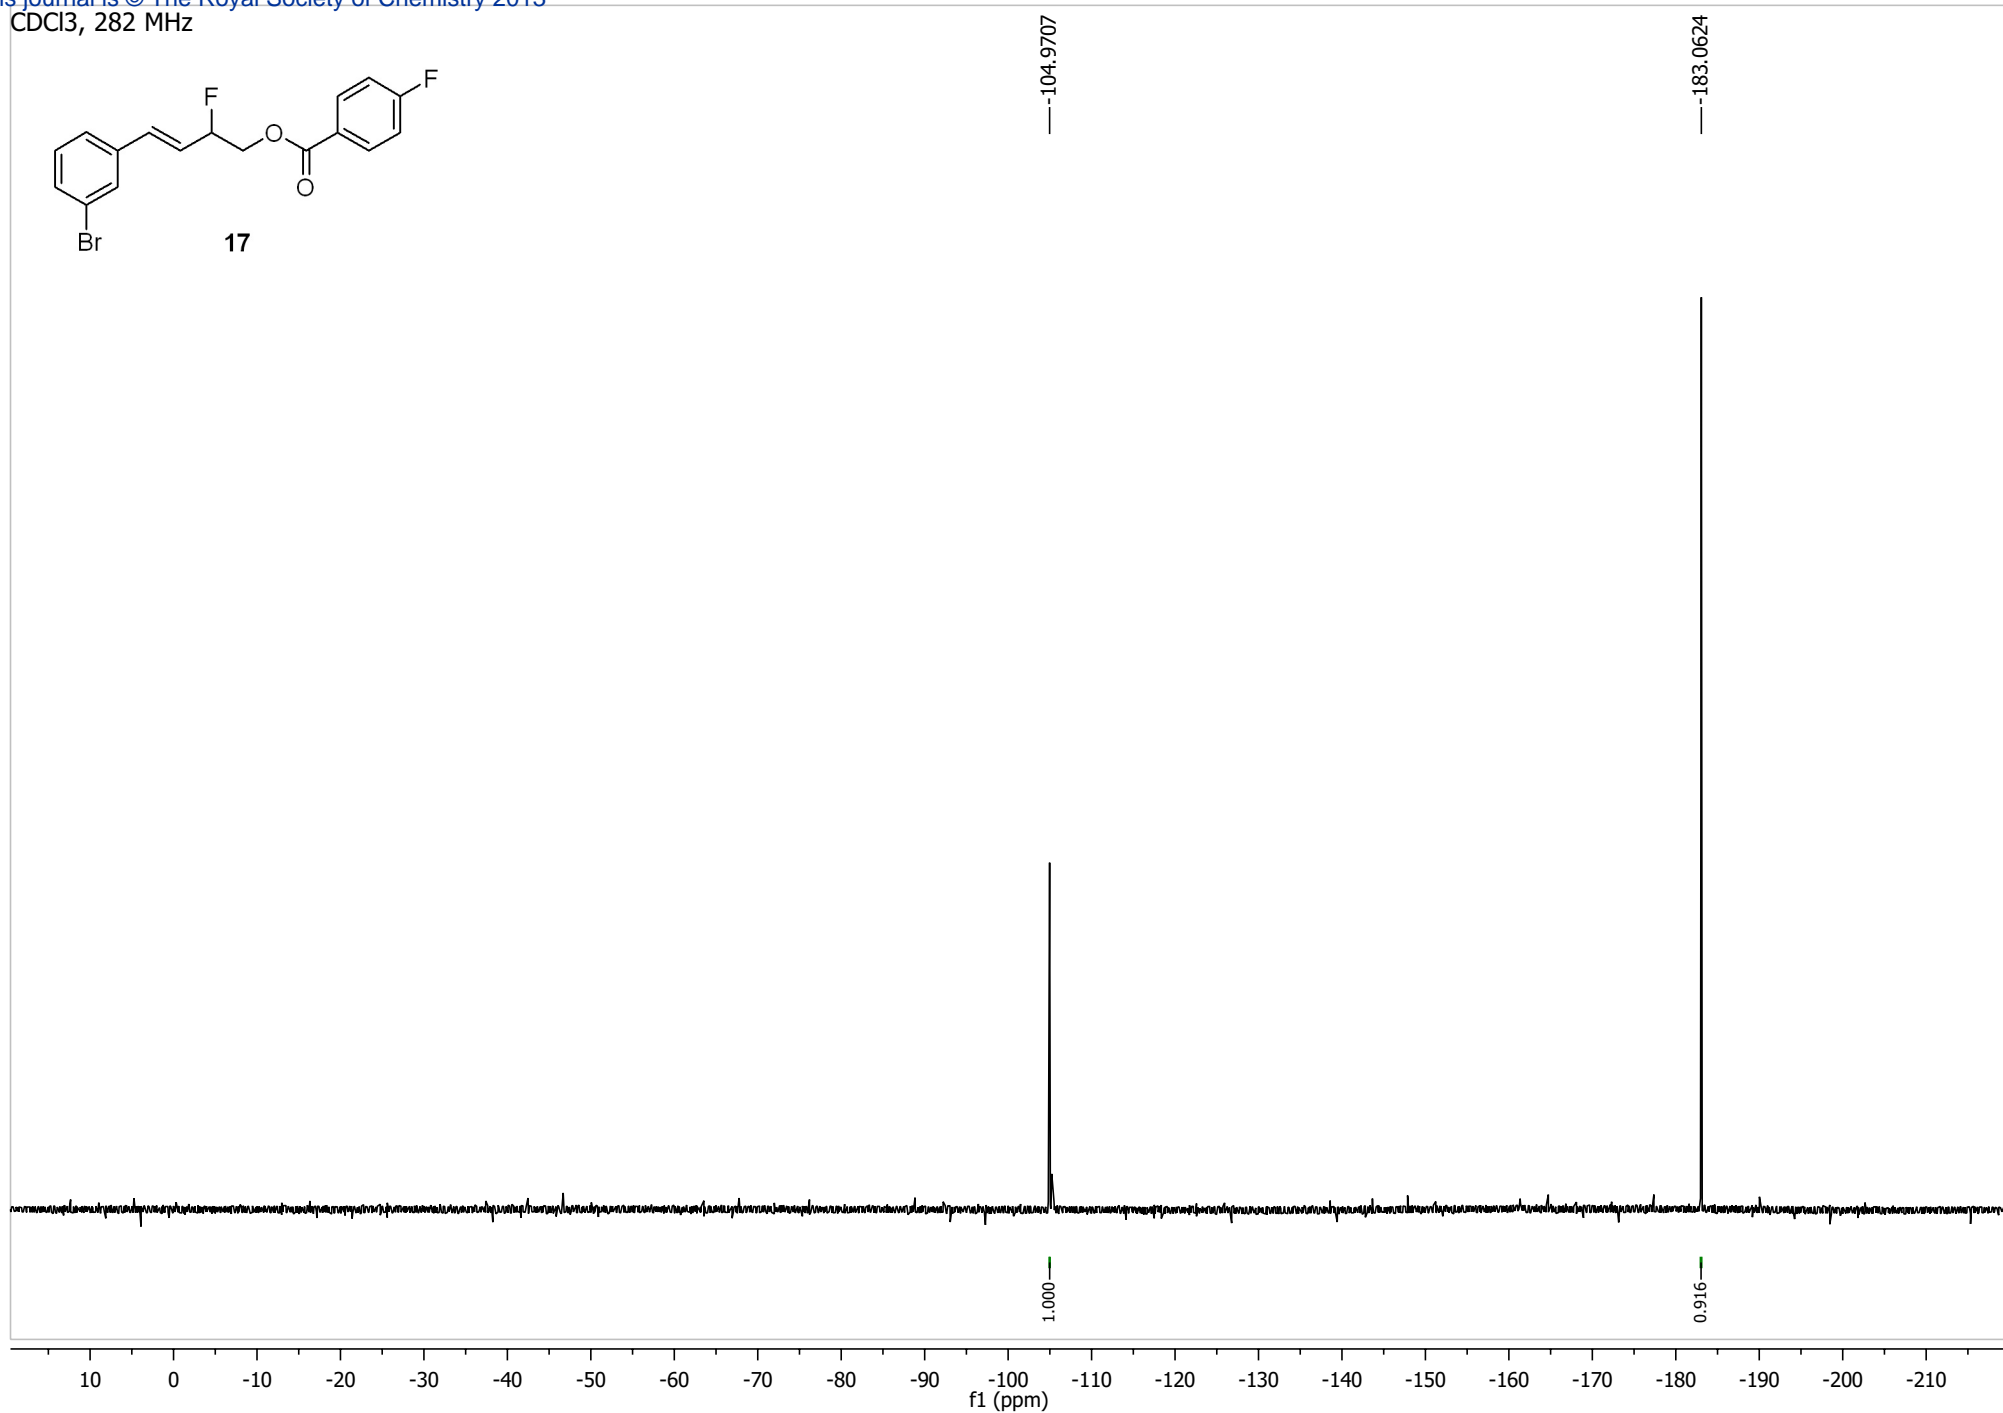

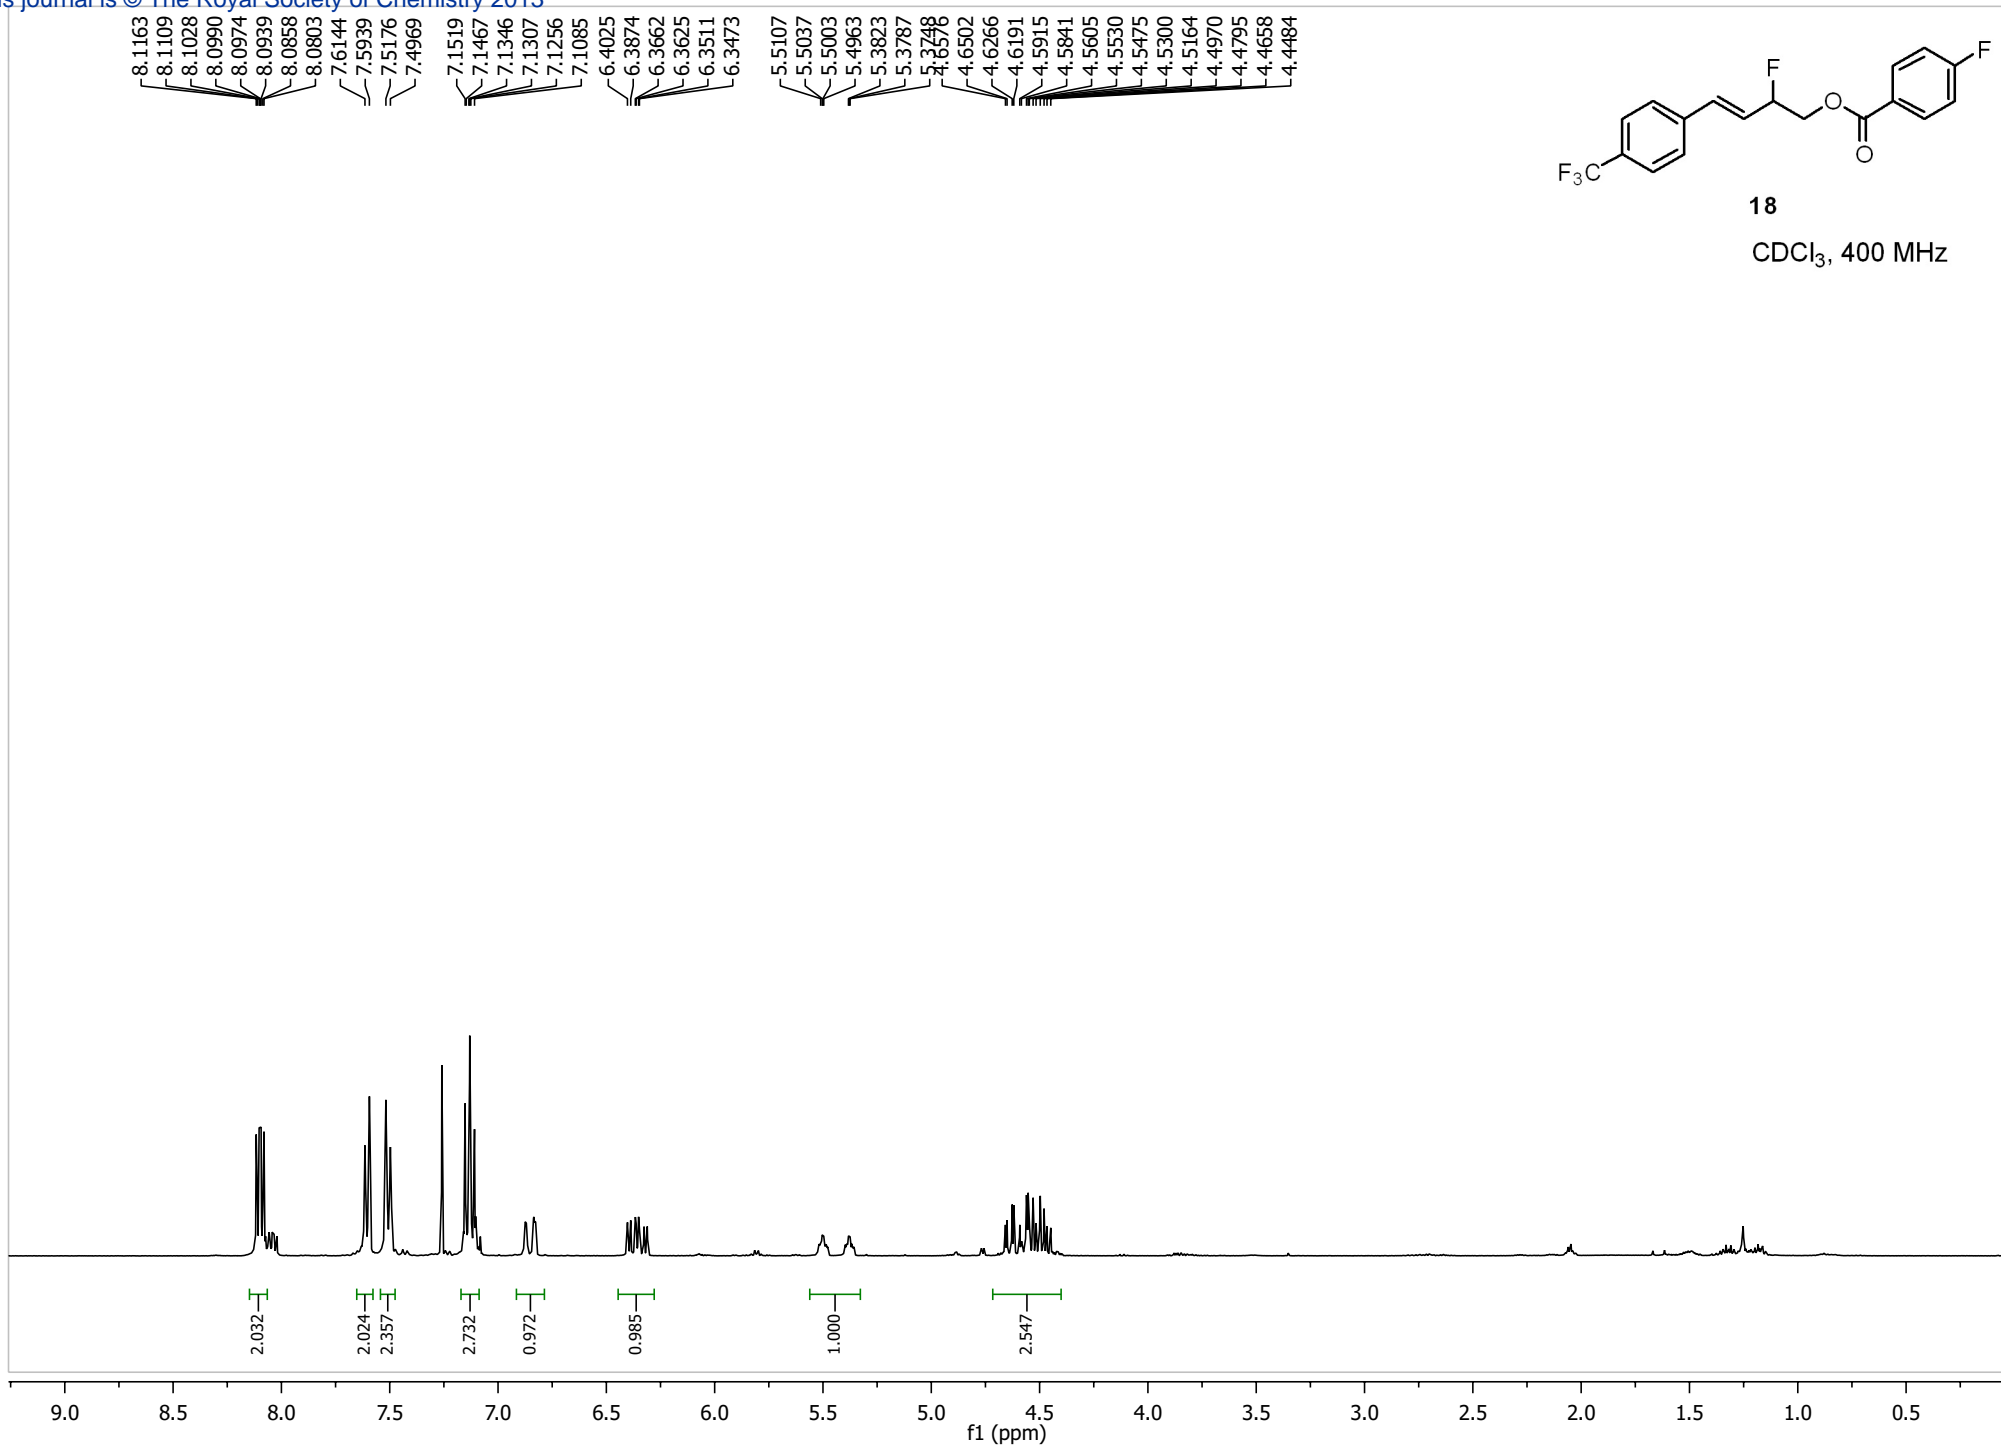

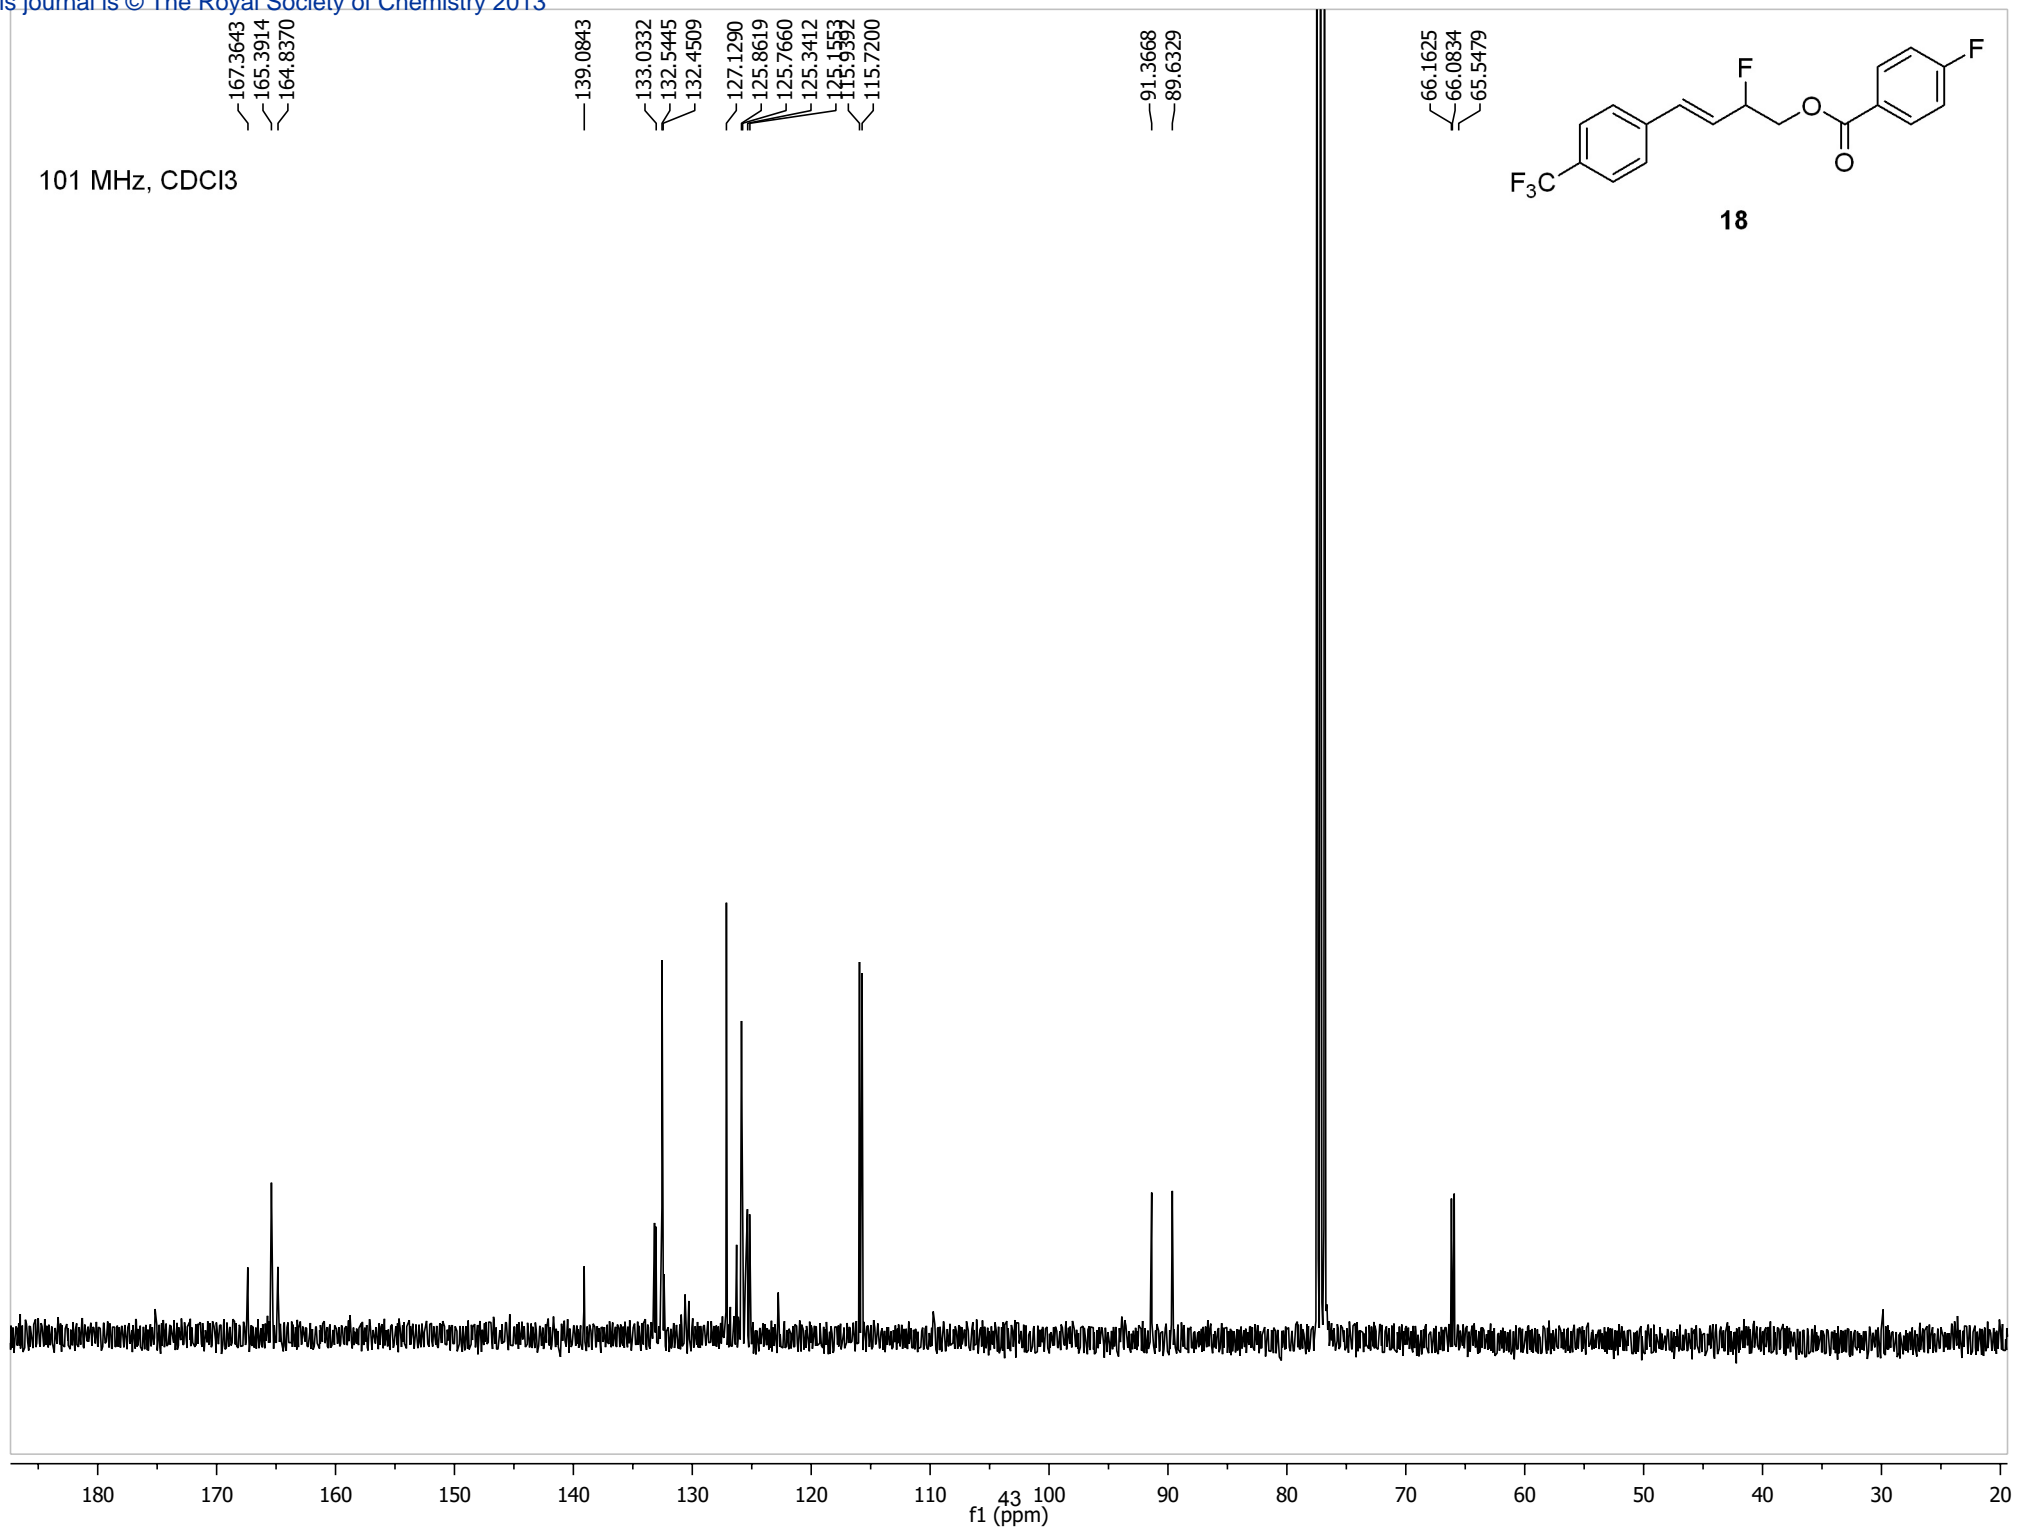

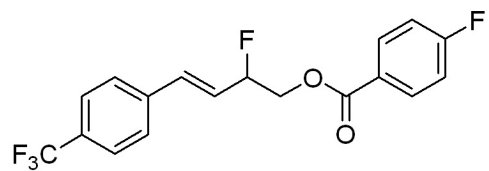

**18**

282 MHz, CDCl<sub>3</sub>

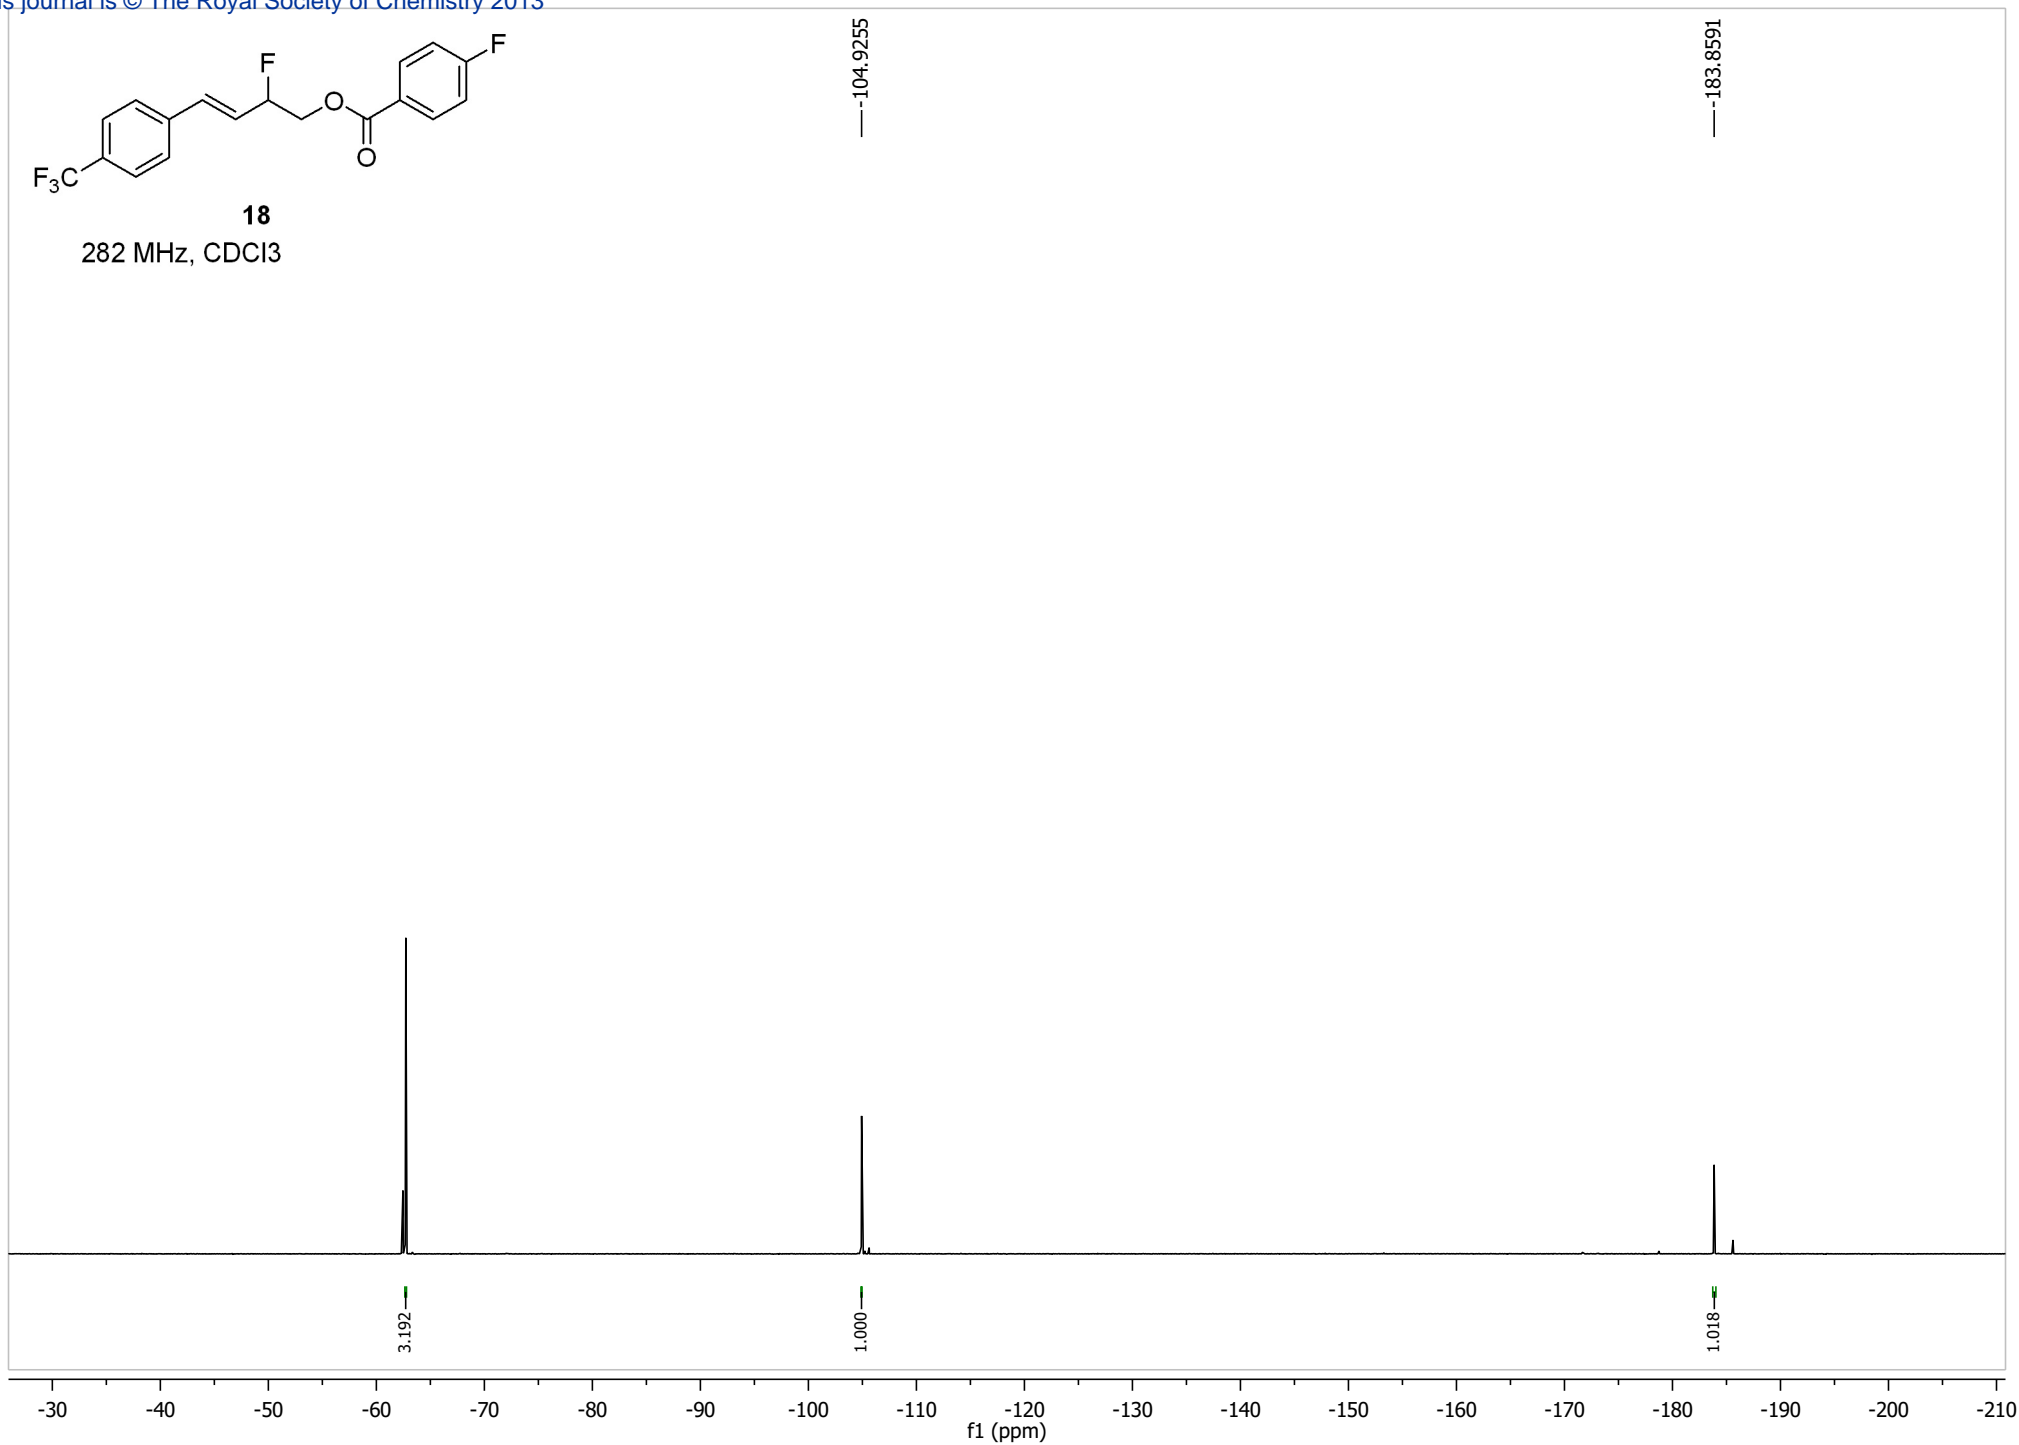

CDCl<sub>3</sub>, 471 MHz

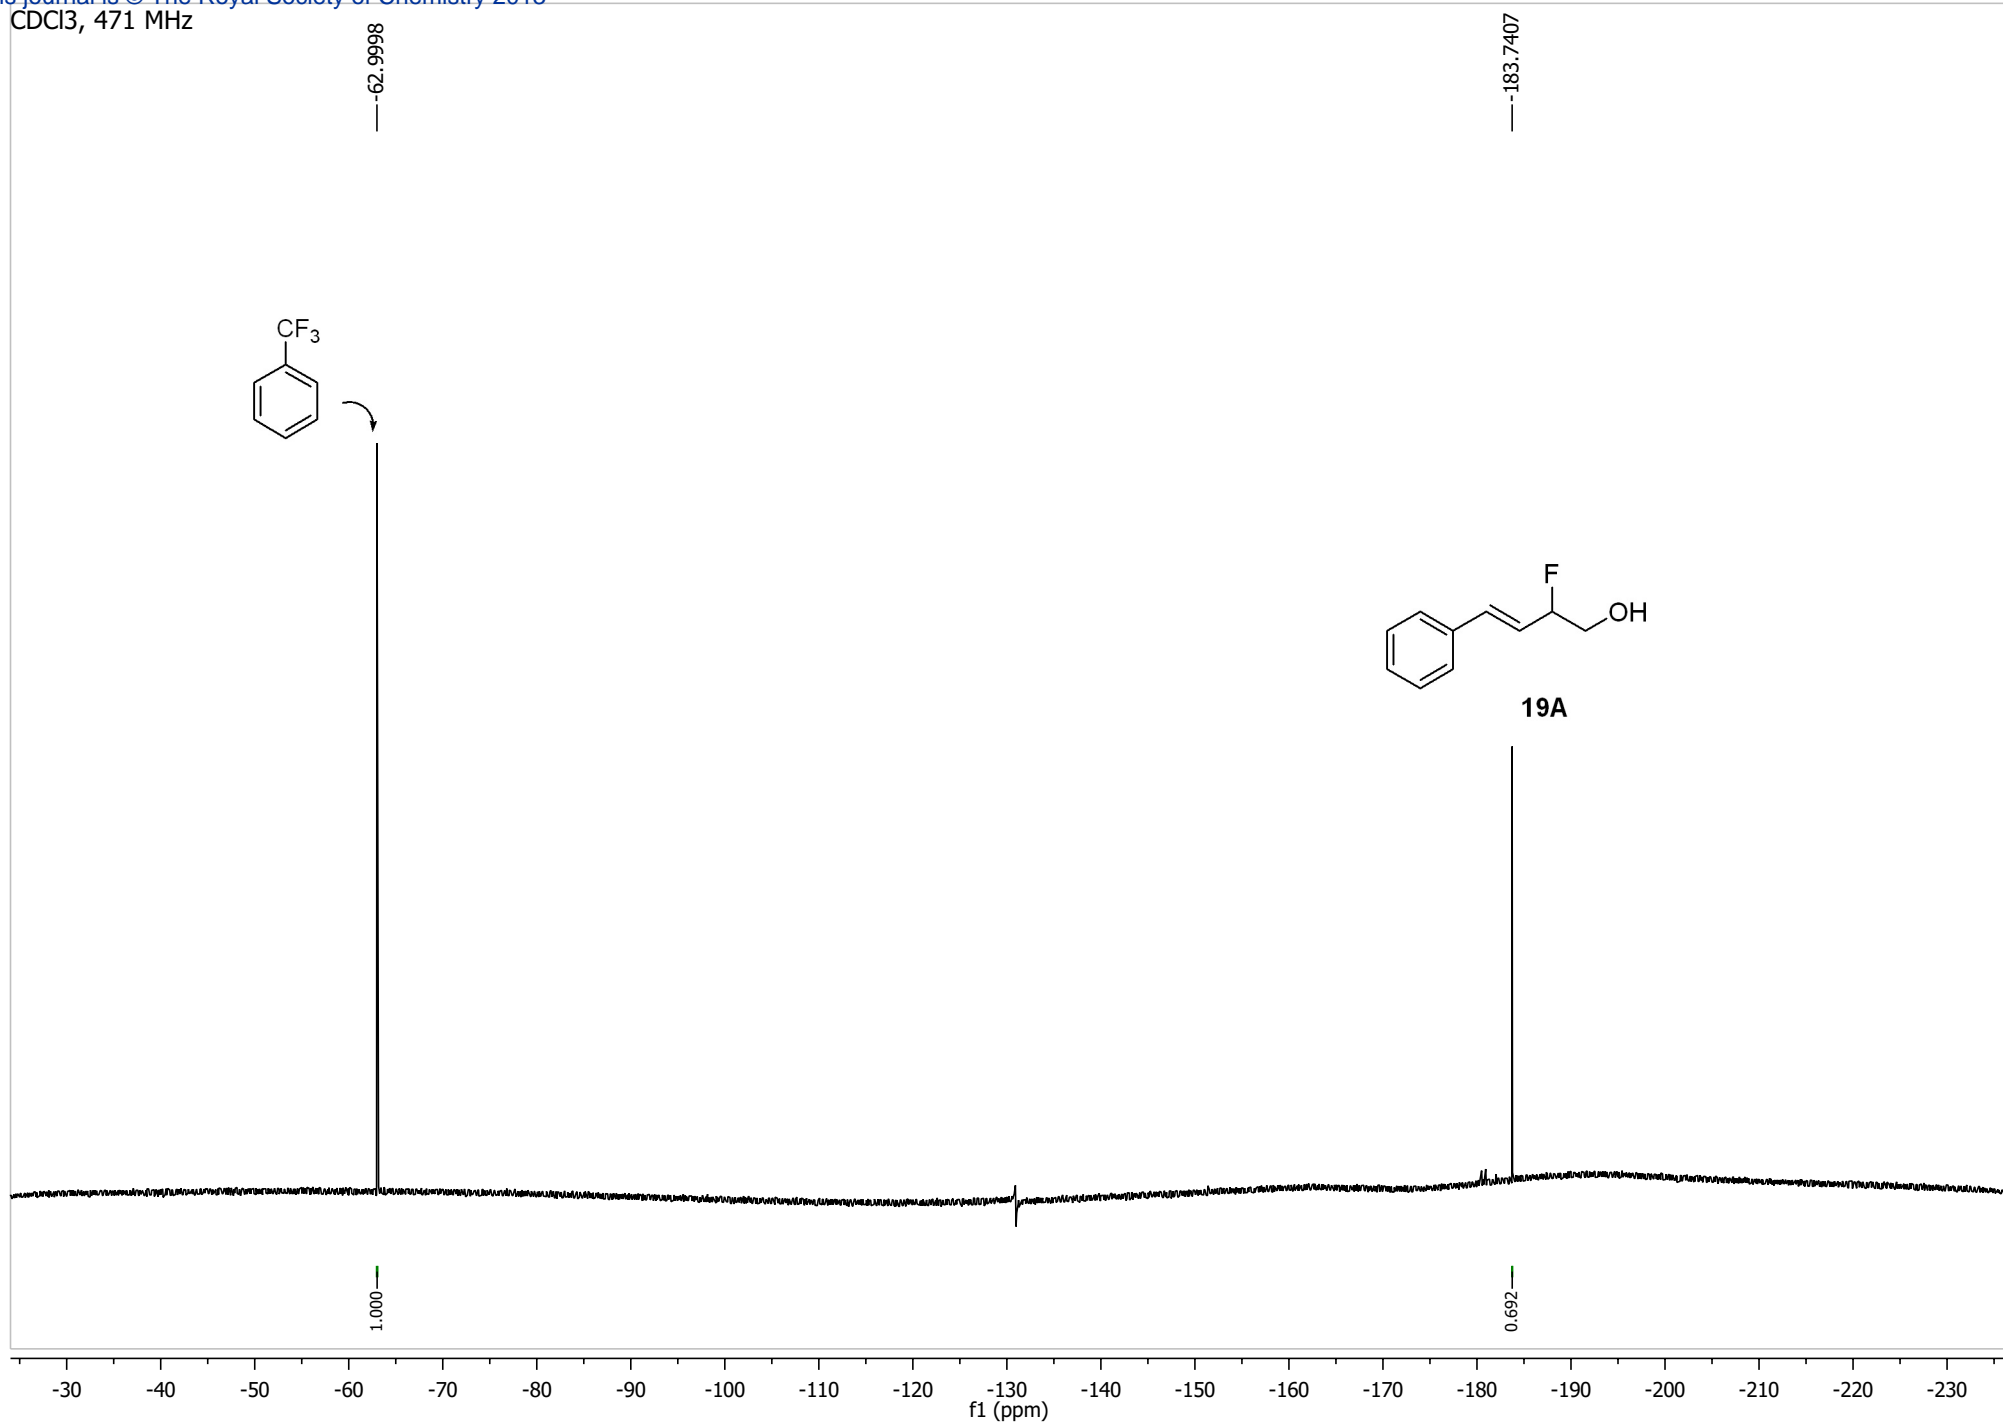

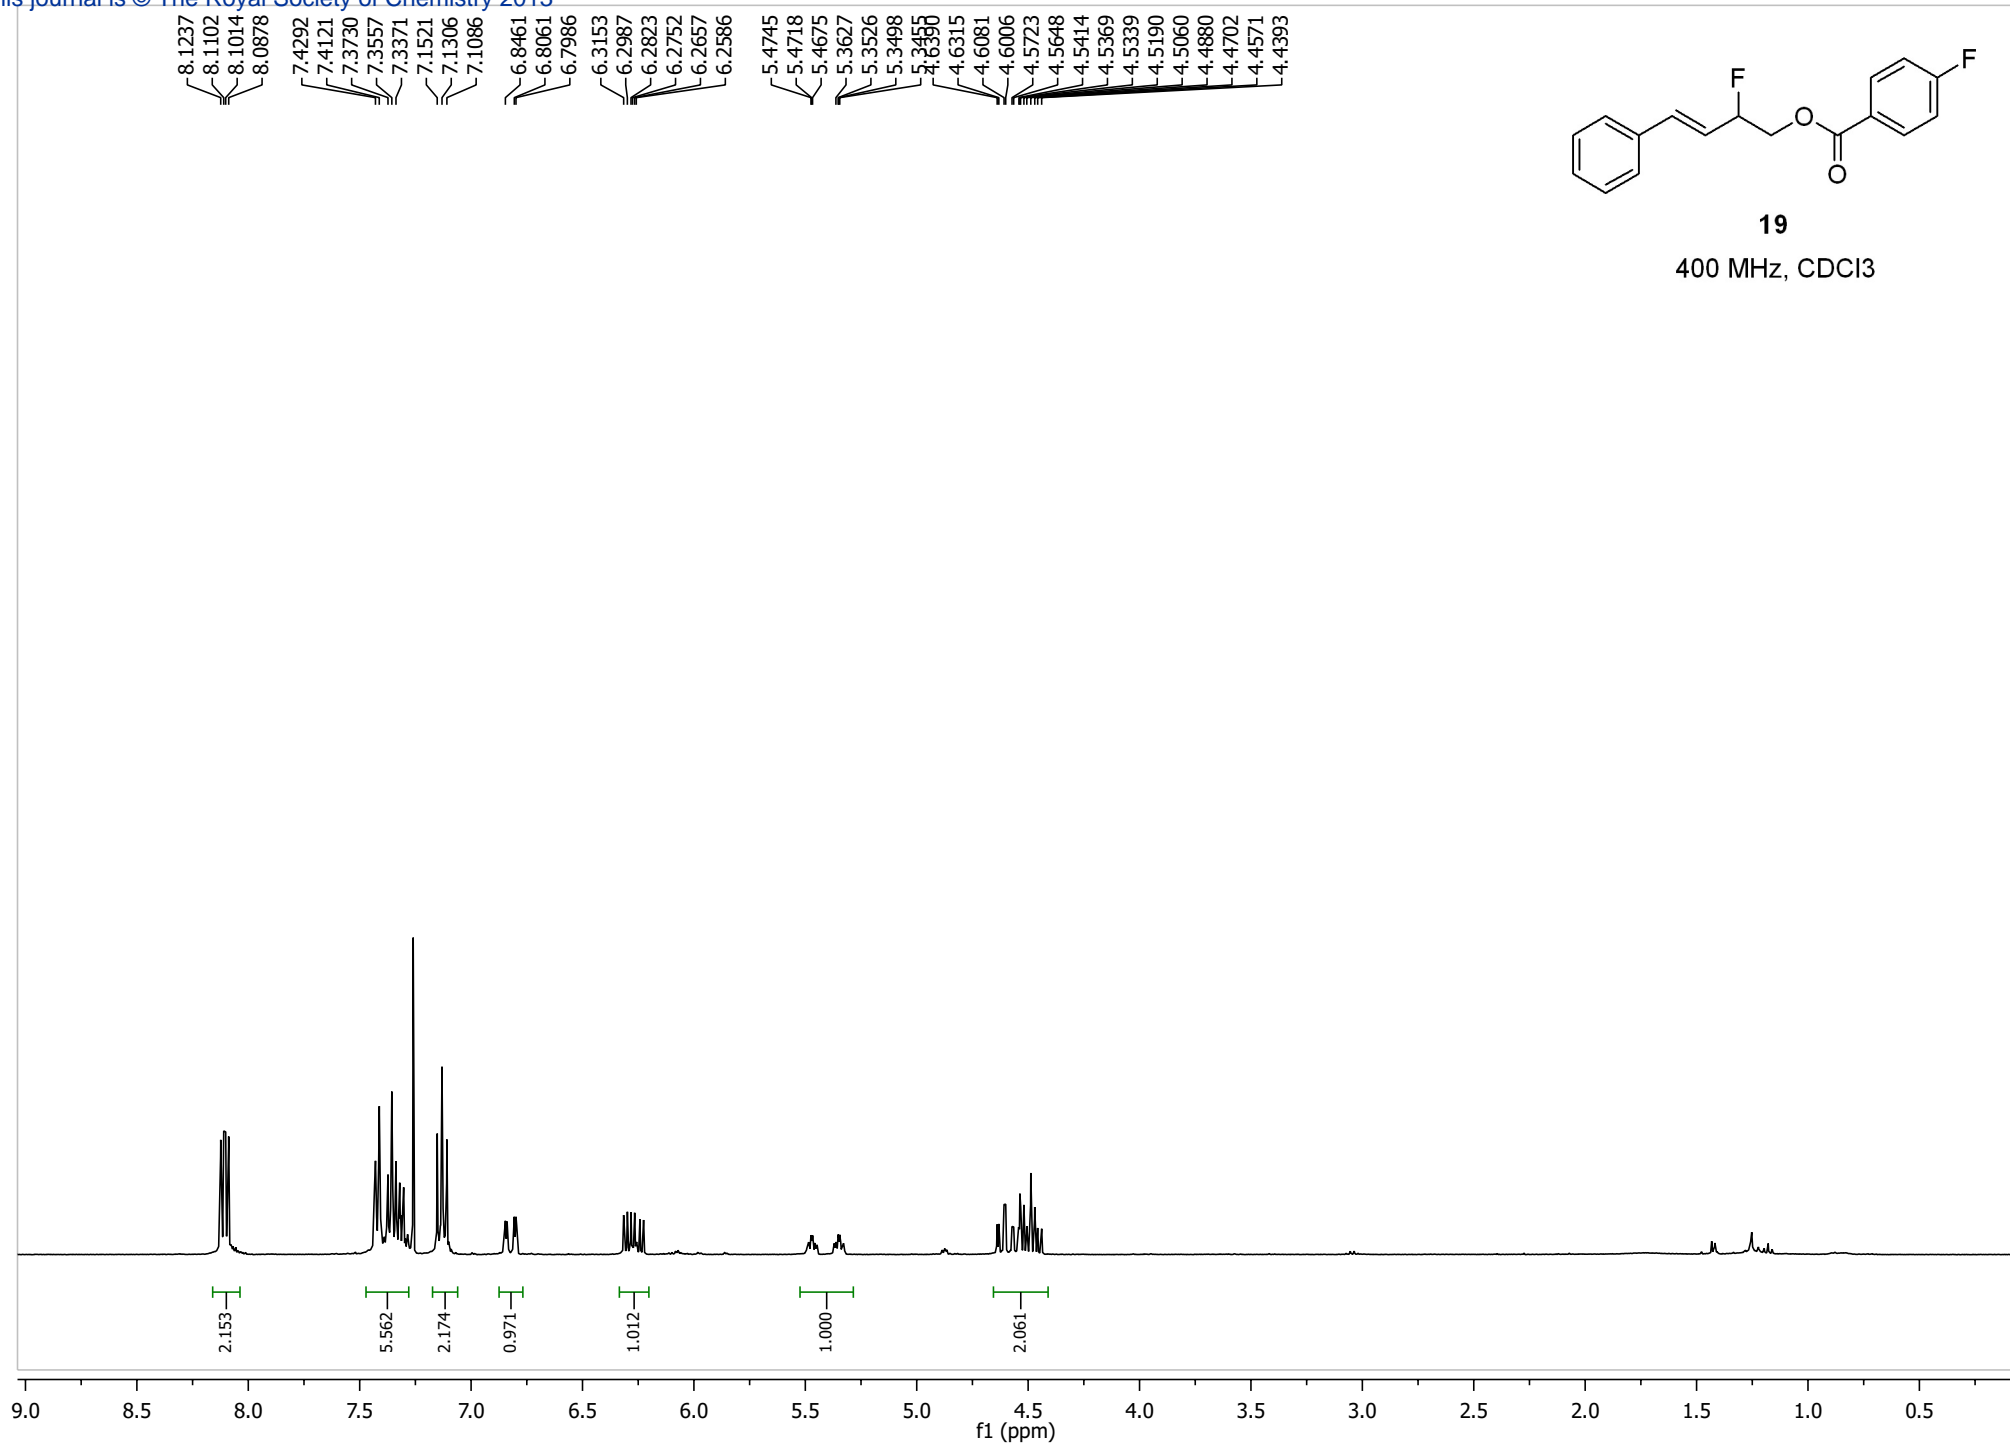

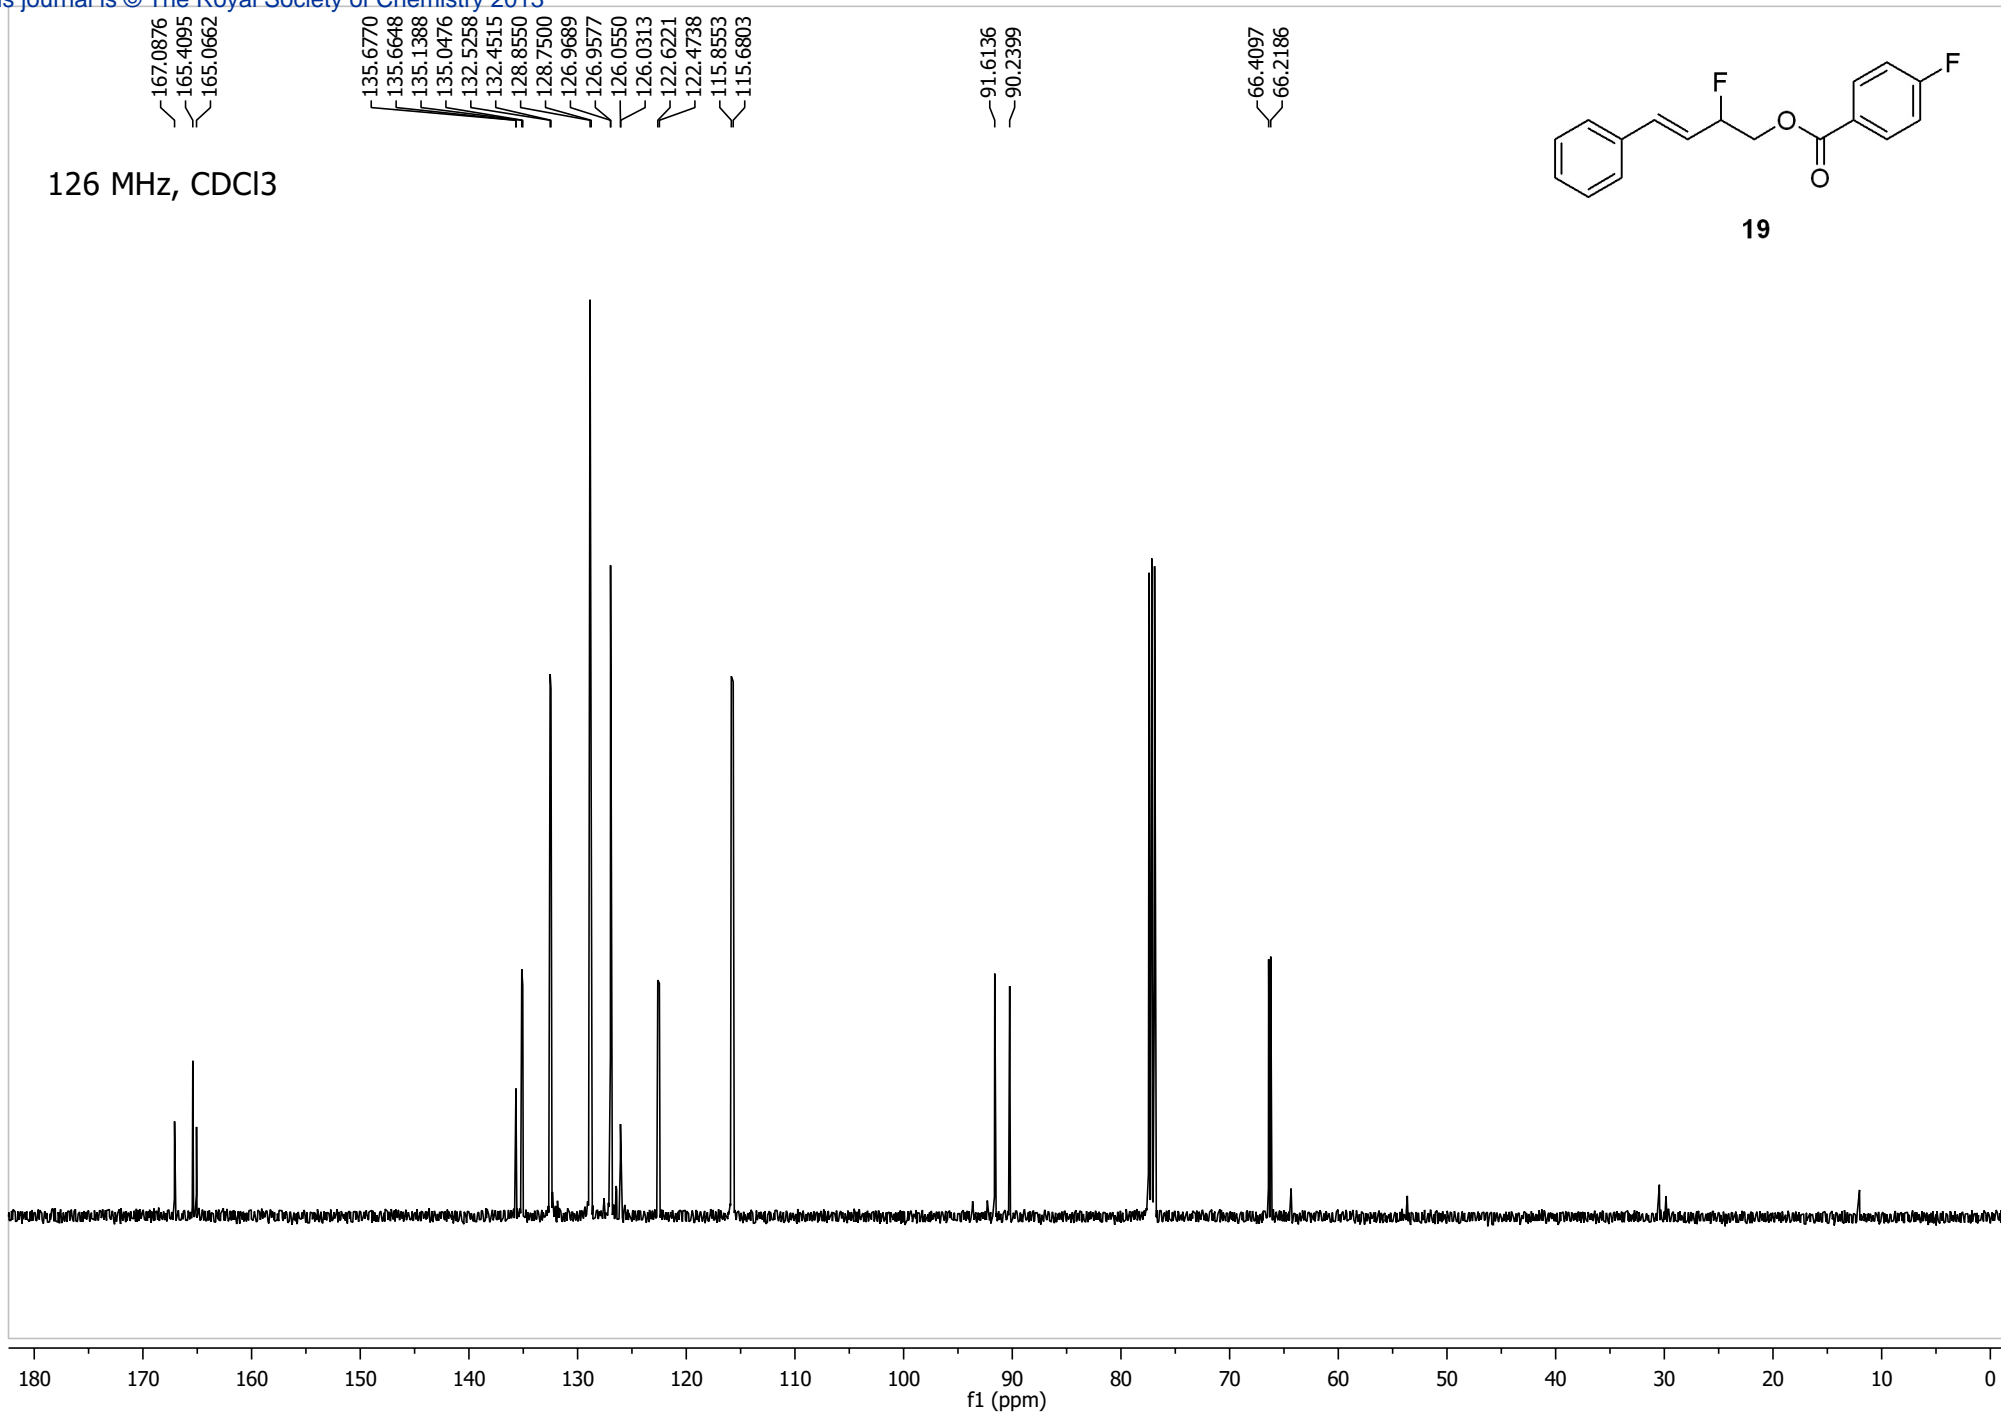

CDCl<sub>3</sub>, 471 MHz

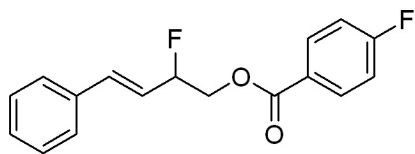

**19**

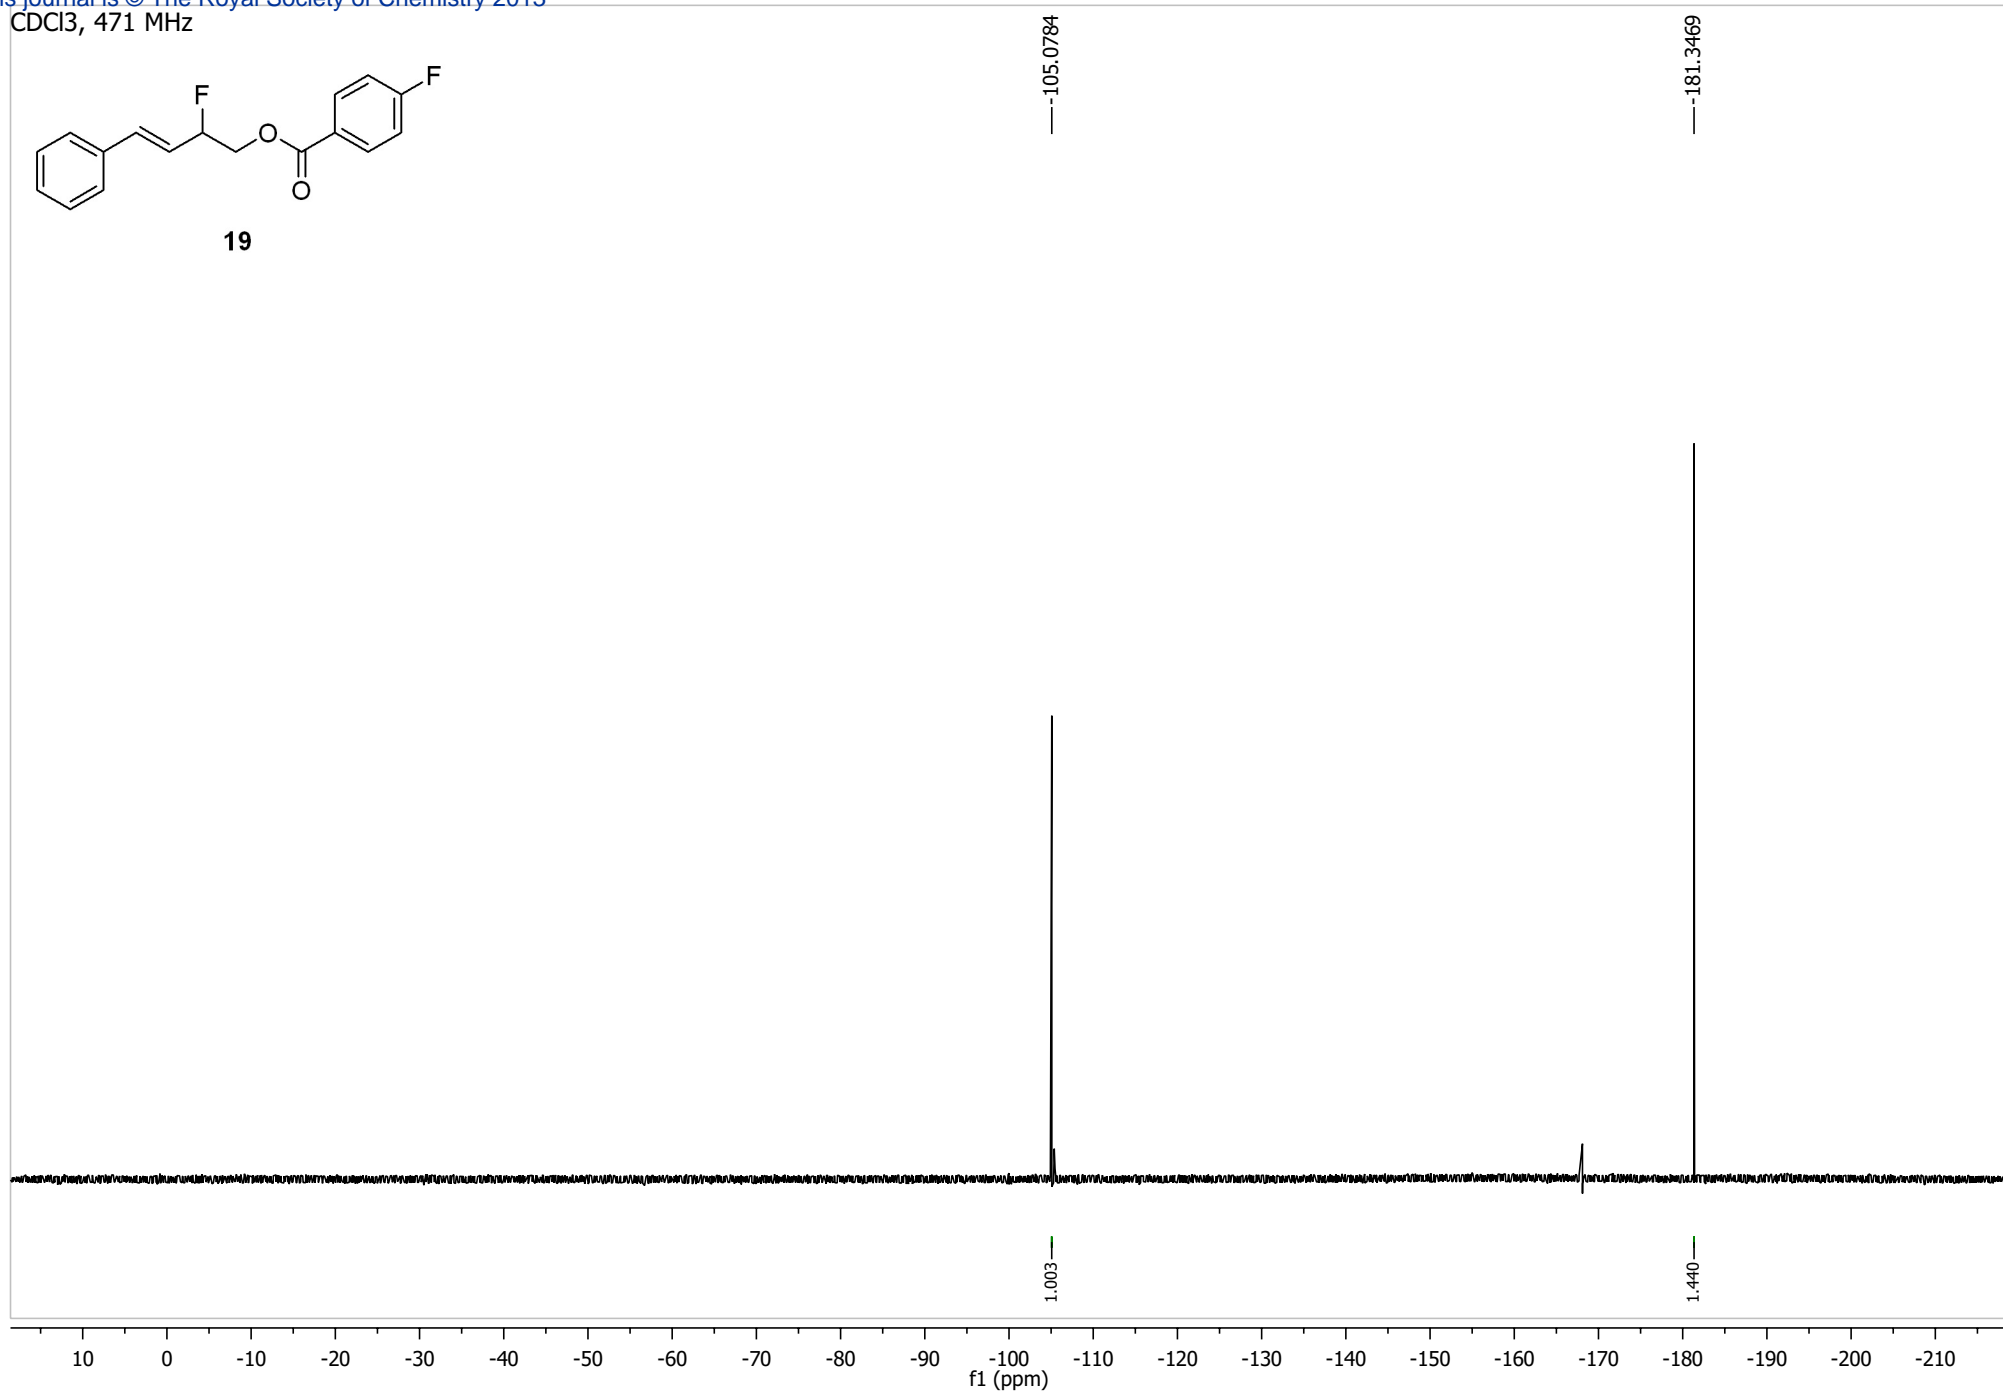



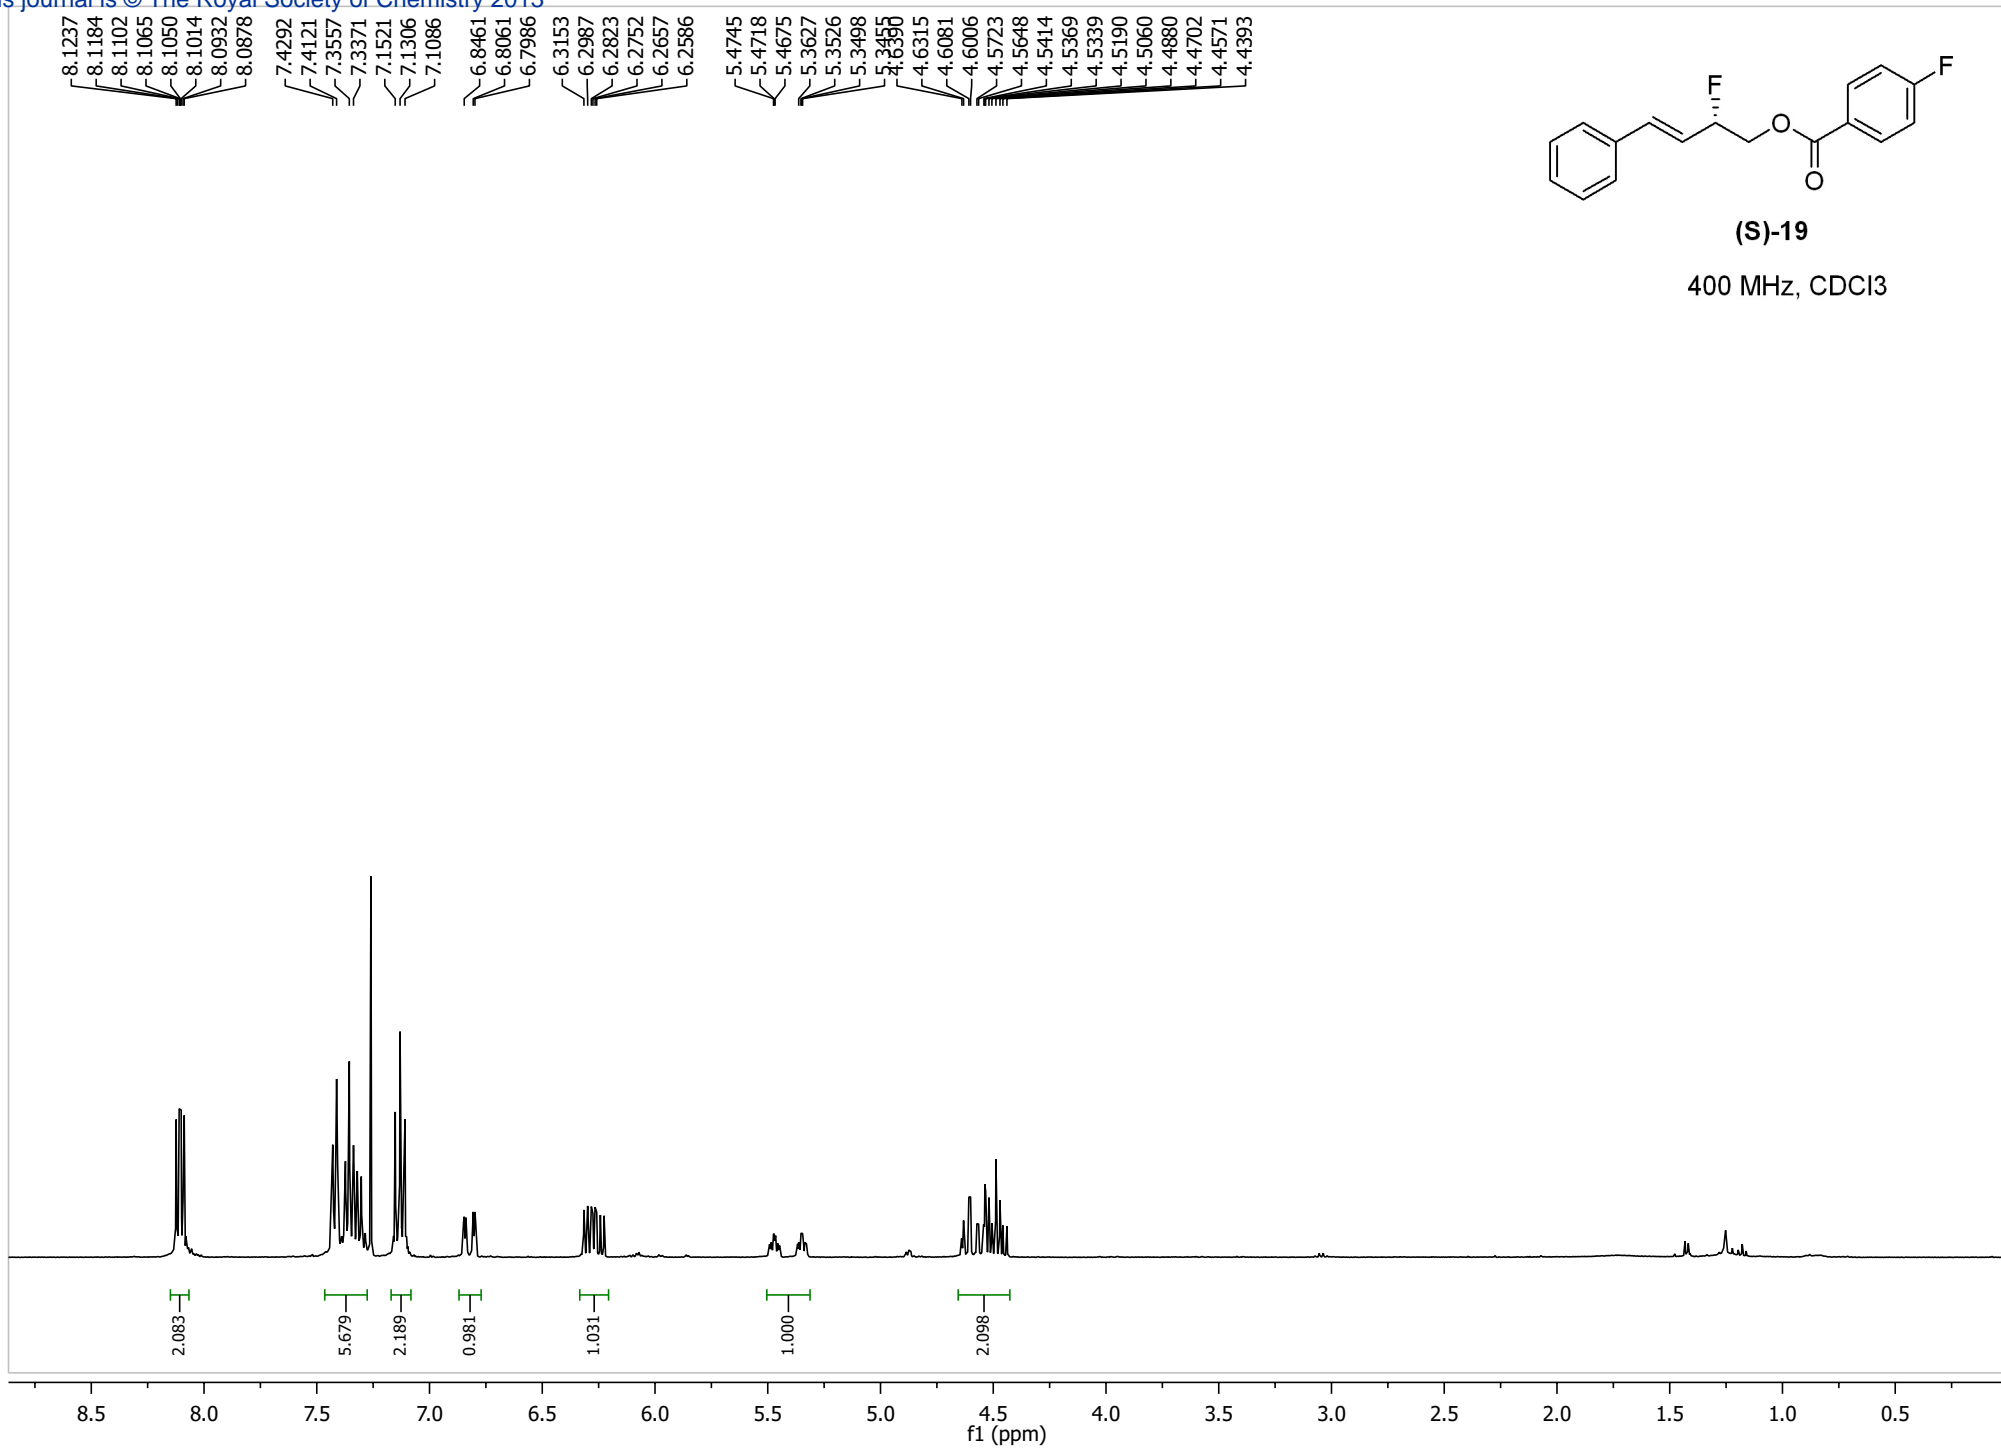

CDCl<sub>3</sub>, 471 MHz

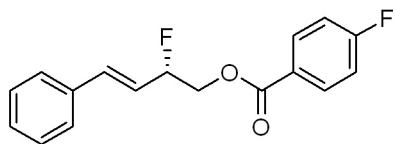

(S)-19

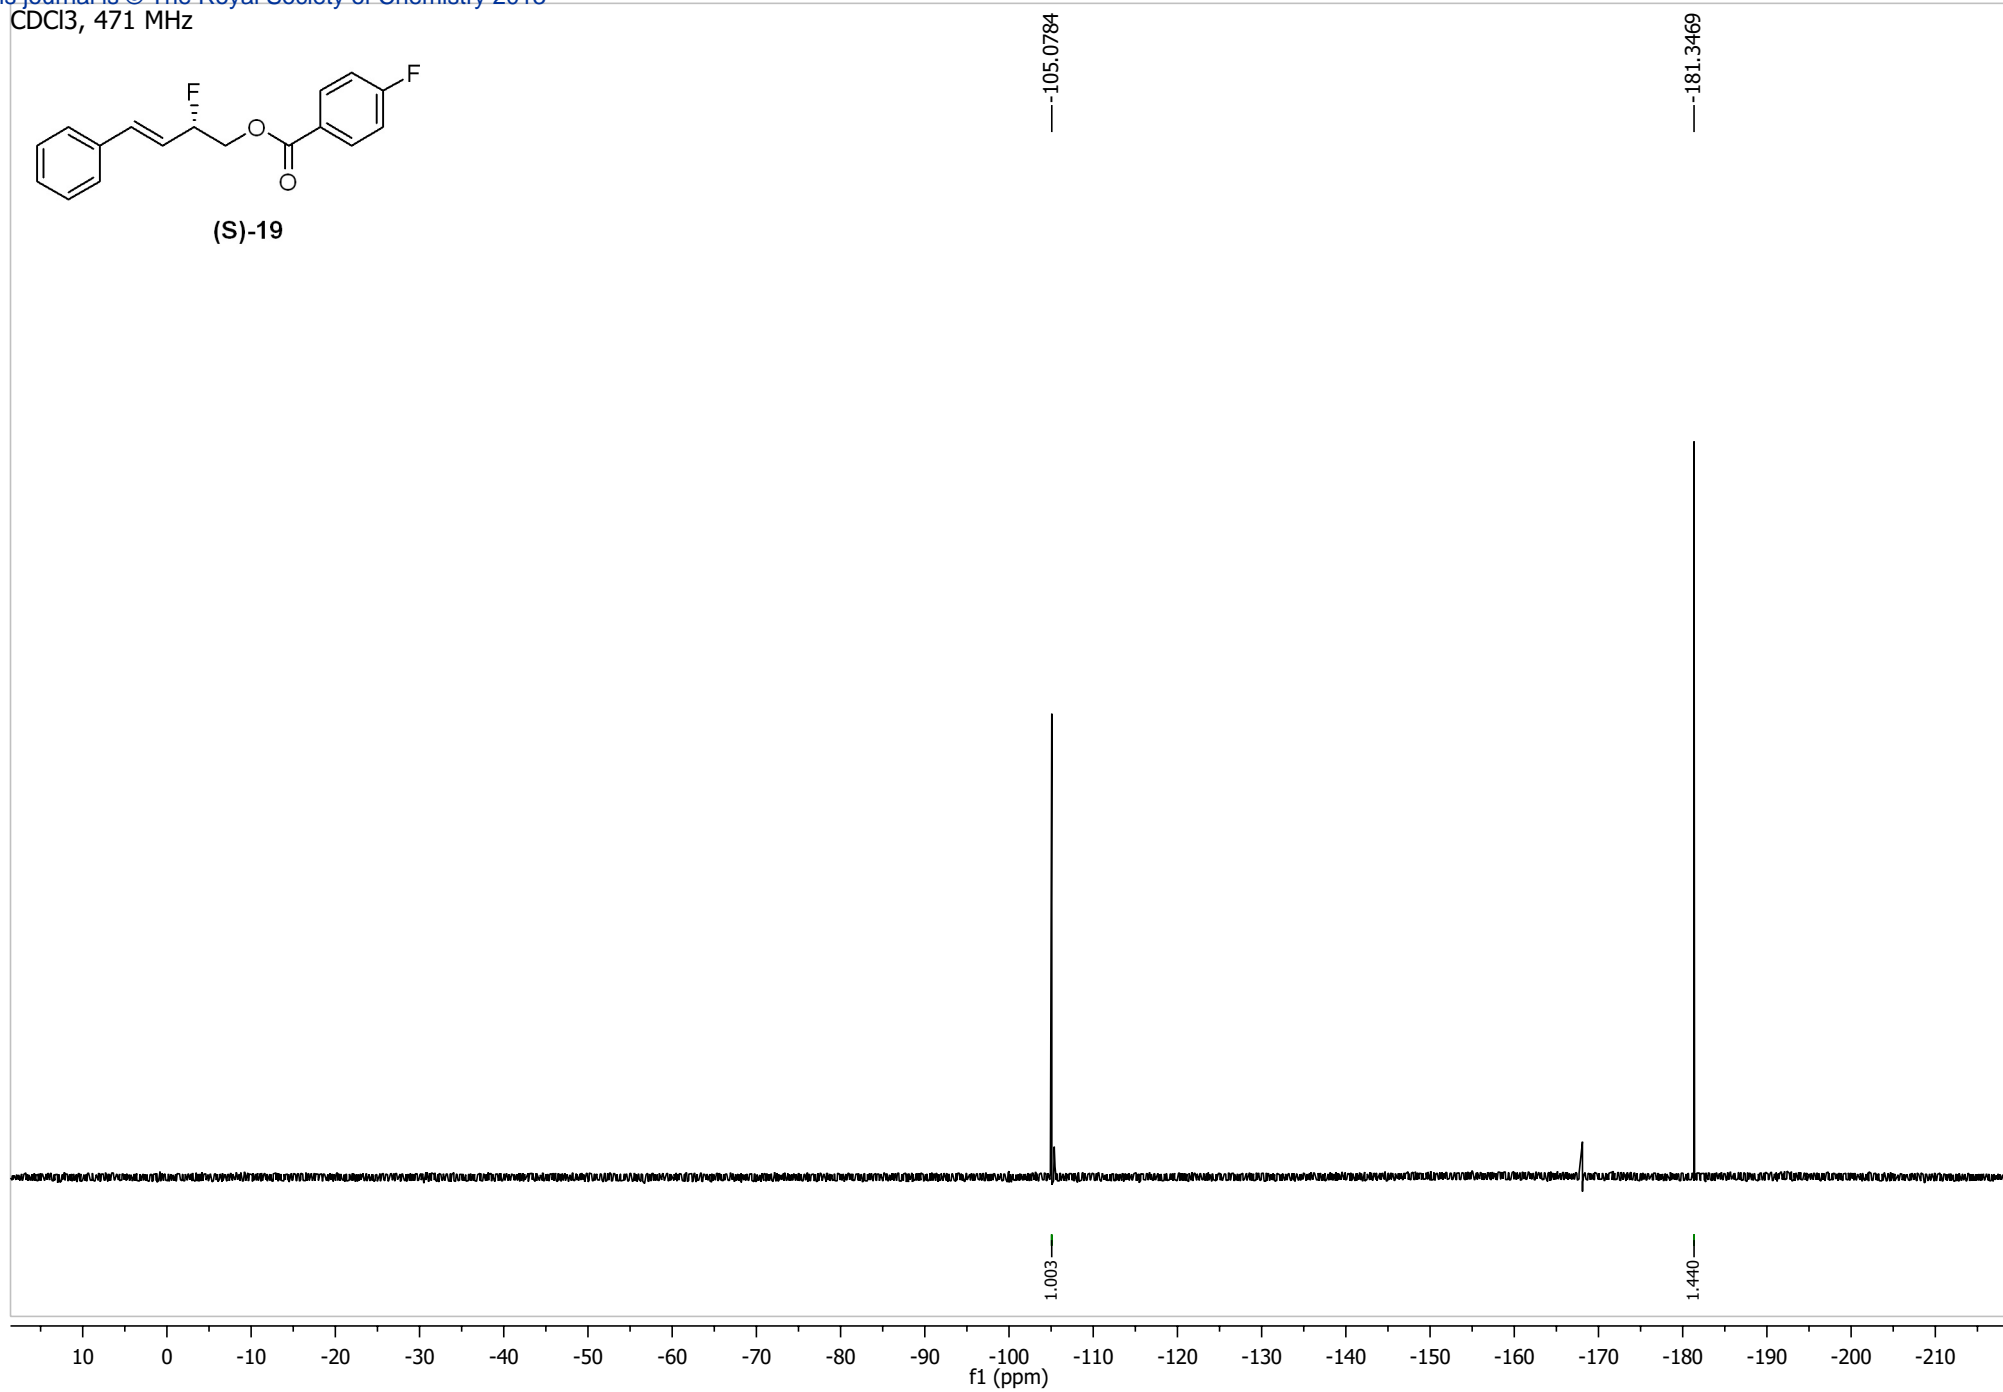

CDCl<sub>3</sub>, 500 MHz

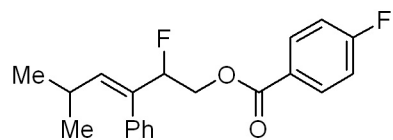

20

8.0335  
7.3794  
7.3654  
7.3514  
7.3280  
7.3141  
7.2307  
7.2164  
7.1989  
7.1851  
7.1176  
7.1016  
7.0857

5.7630  
5.7432

5.3945  
5.3800

5.2976  
5.2837

4.4164  
4.3913

4.3613  
4.3374

4.3291  
4.3114

4.2877  
4.2749

2.3345

0.9601  
0.9430  
0.9273

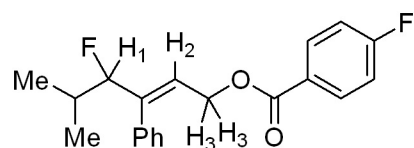

20B

H<sub>2</sub>

H<sub>1</sub> & H<sub>3</sub>

1.965

3.767

2.054

2.029

0.209

0.961

1.000

0.603

1.962

0.931

6.640

8.5 8.0 7.5 7.0 6.5 6.0 5.5 5.0 4.5 4.0 3.5 3.0 2.5 2.0 1.5 1.0 0.5 0.0

f1 (ppm)

101 MHz, CDCl<sub>3</sub>

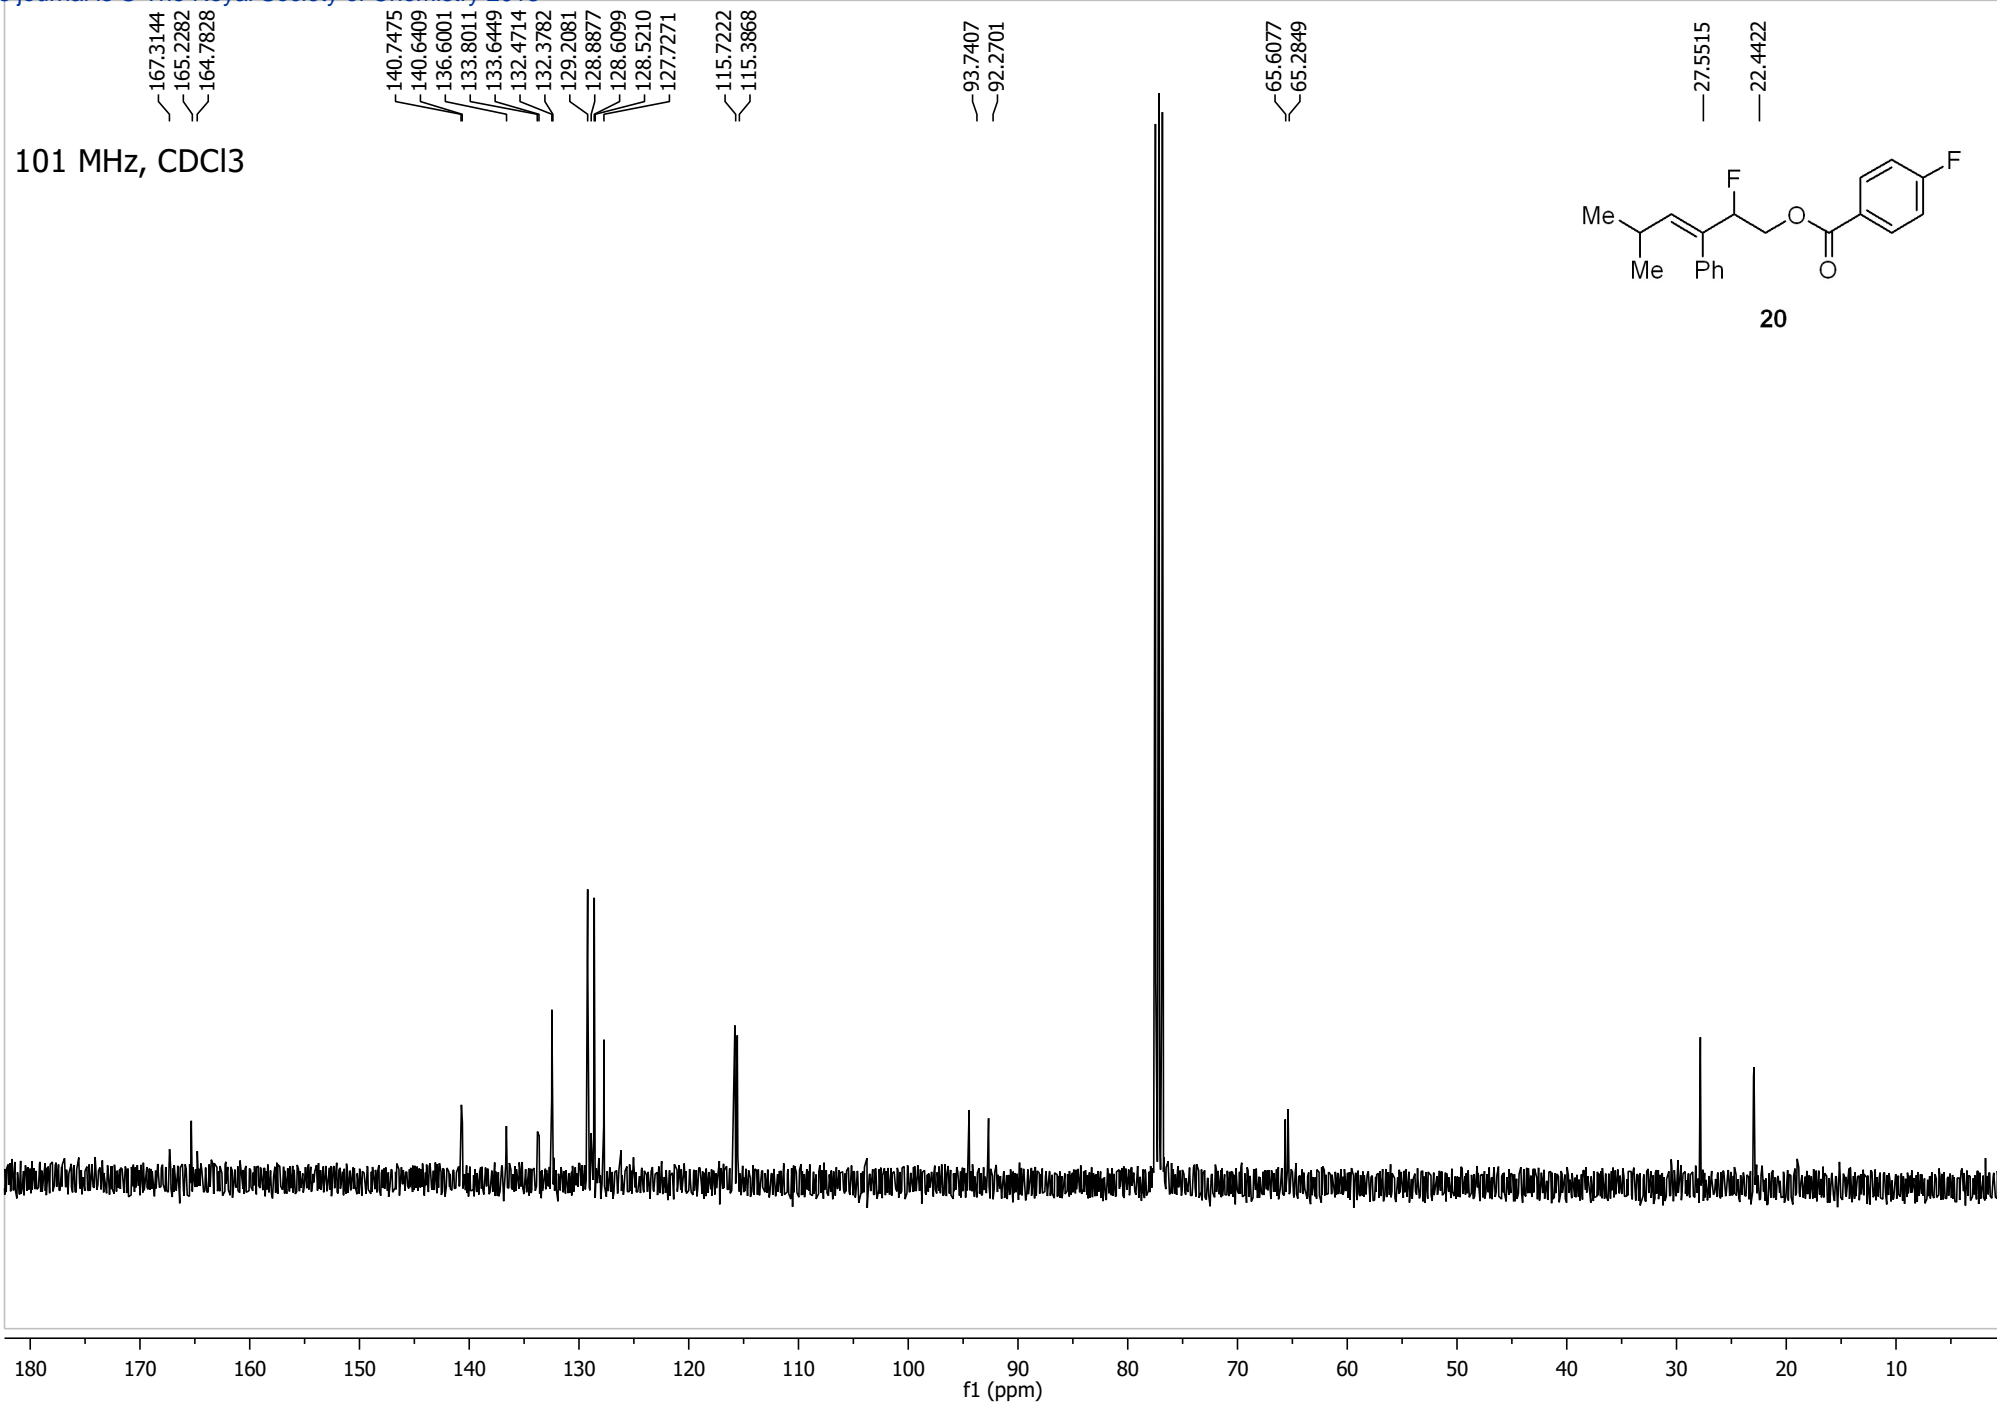

CDCl<sub>3</sub>, 471 MHz

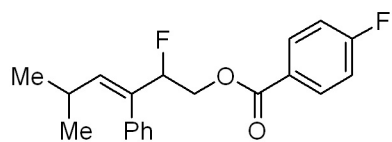

20

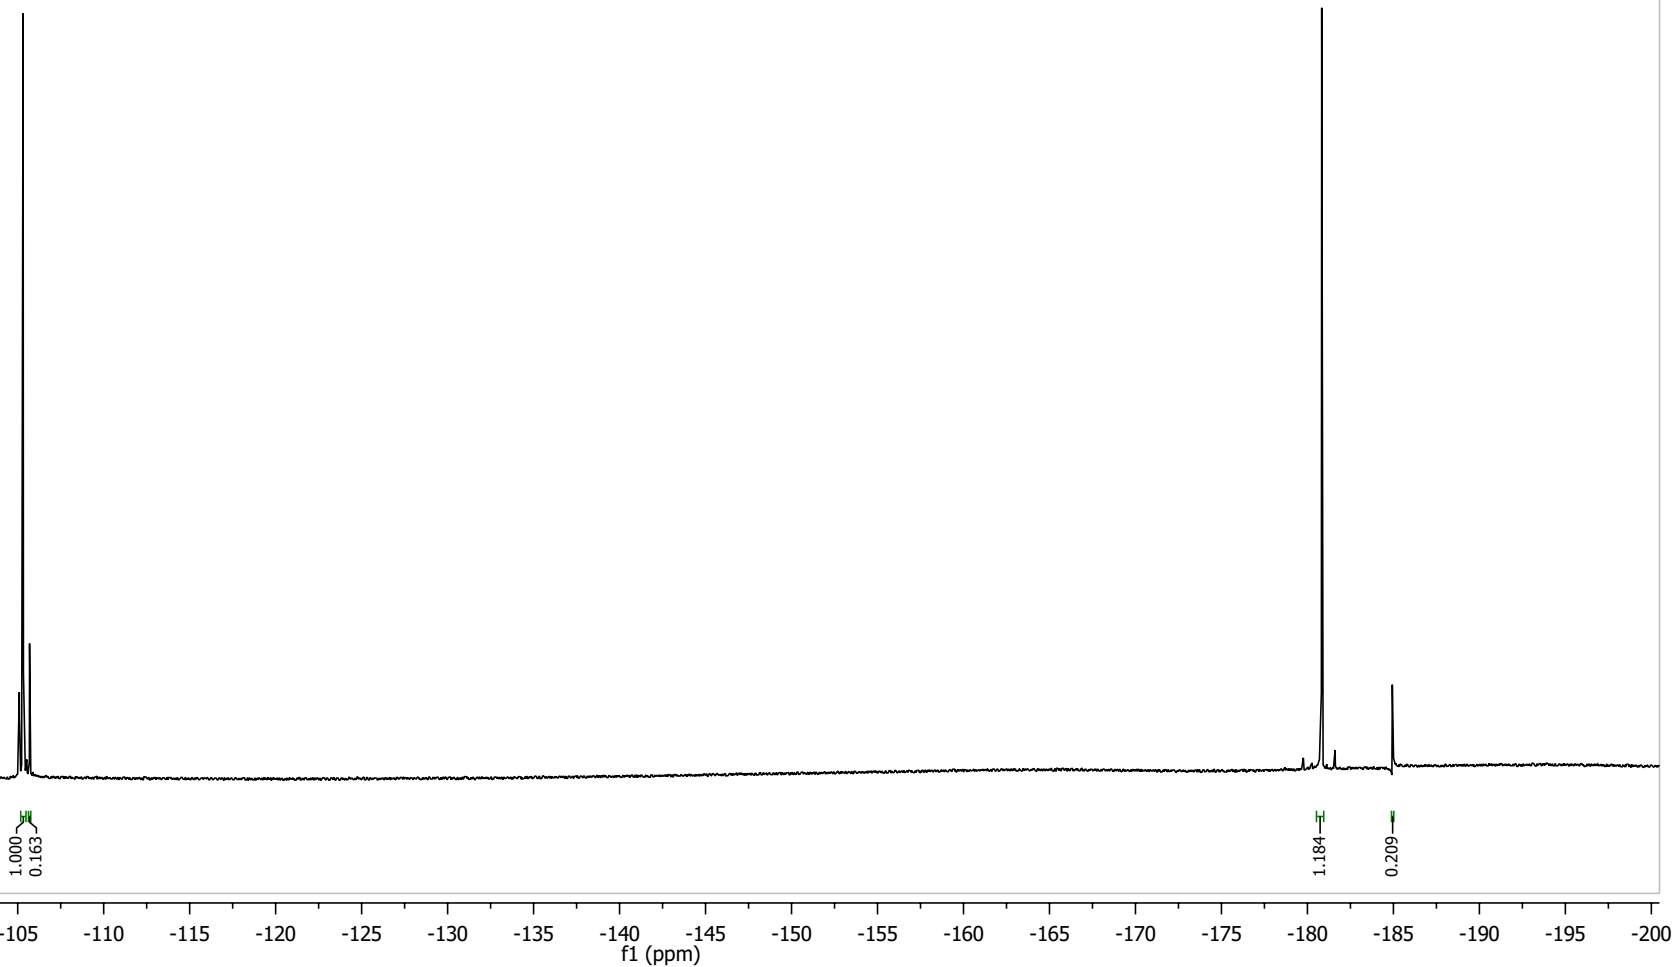

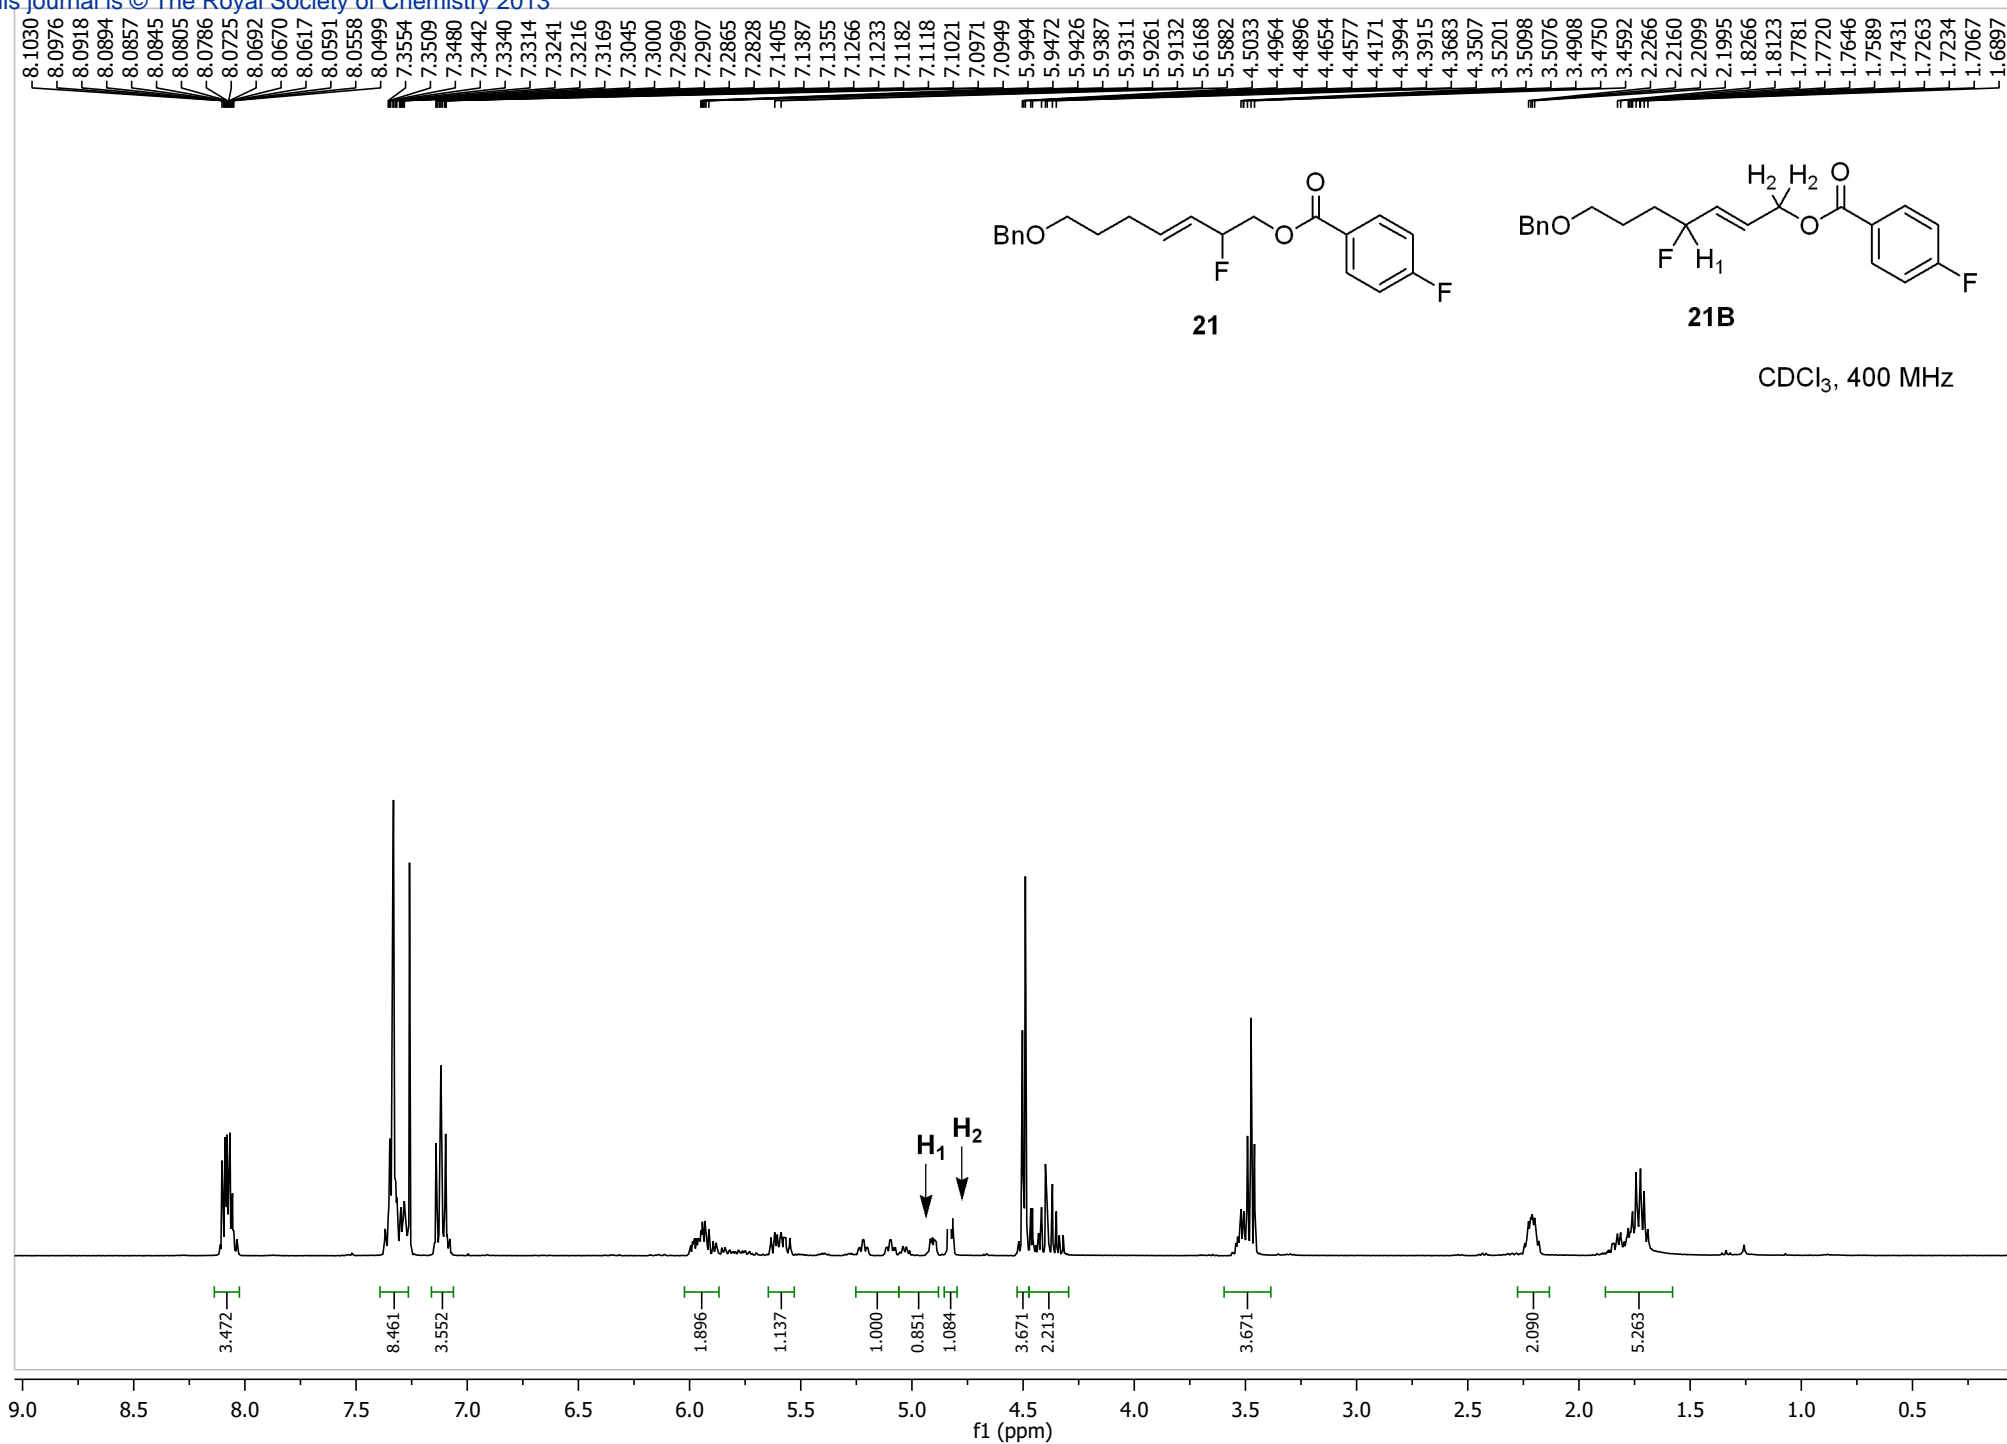

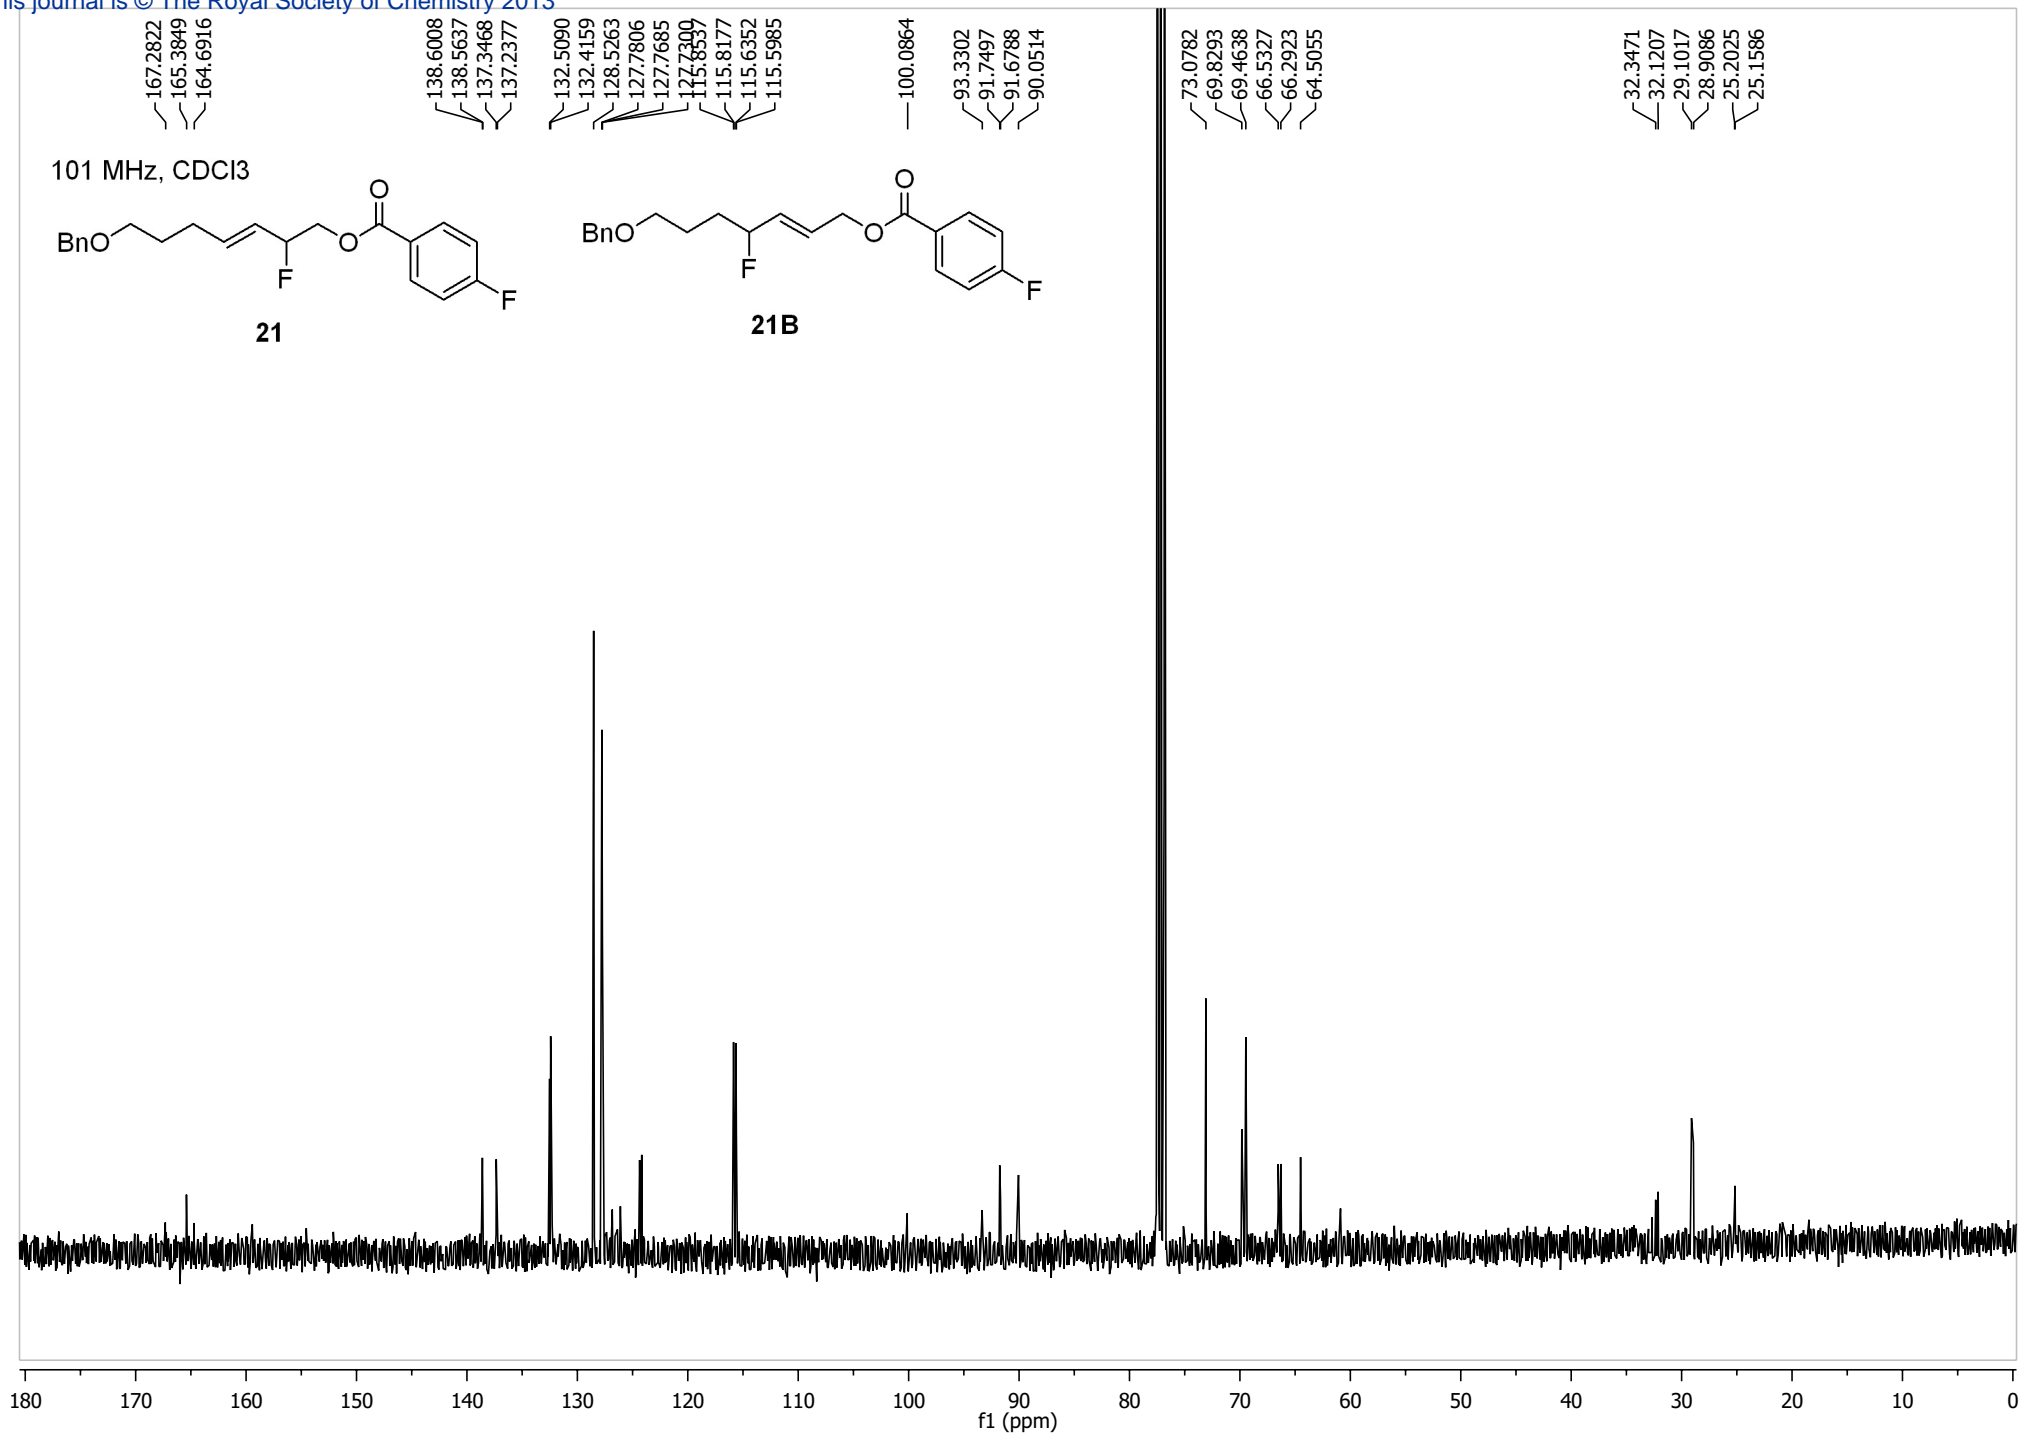

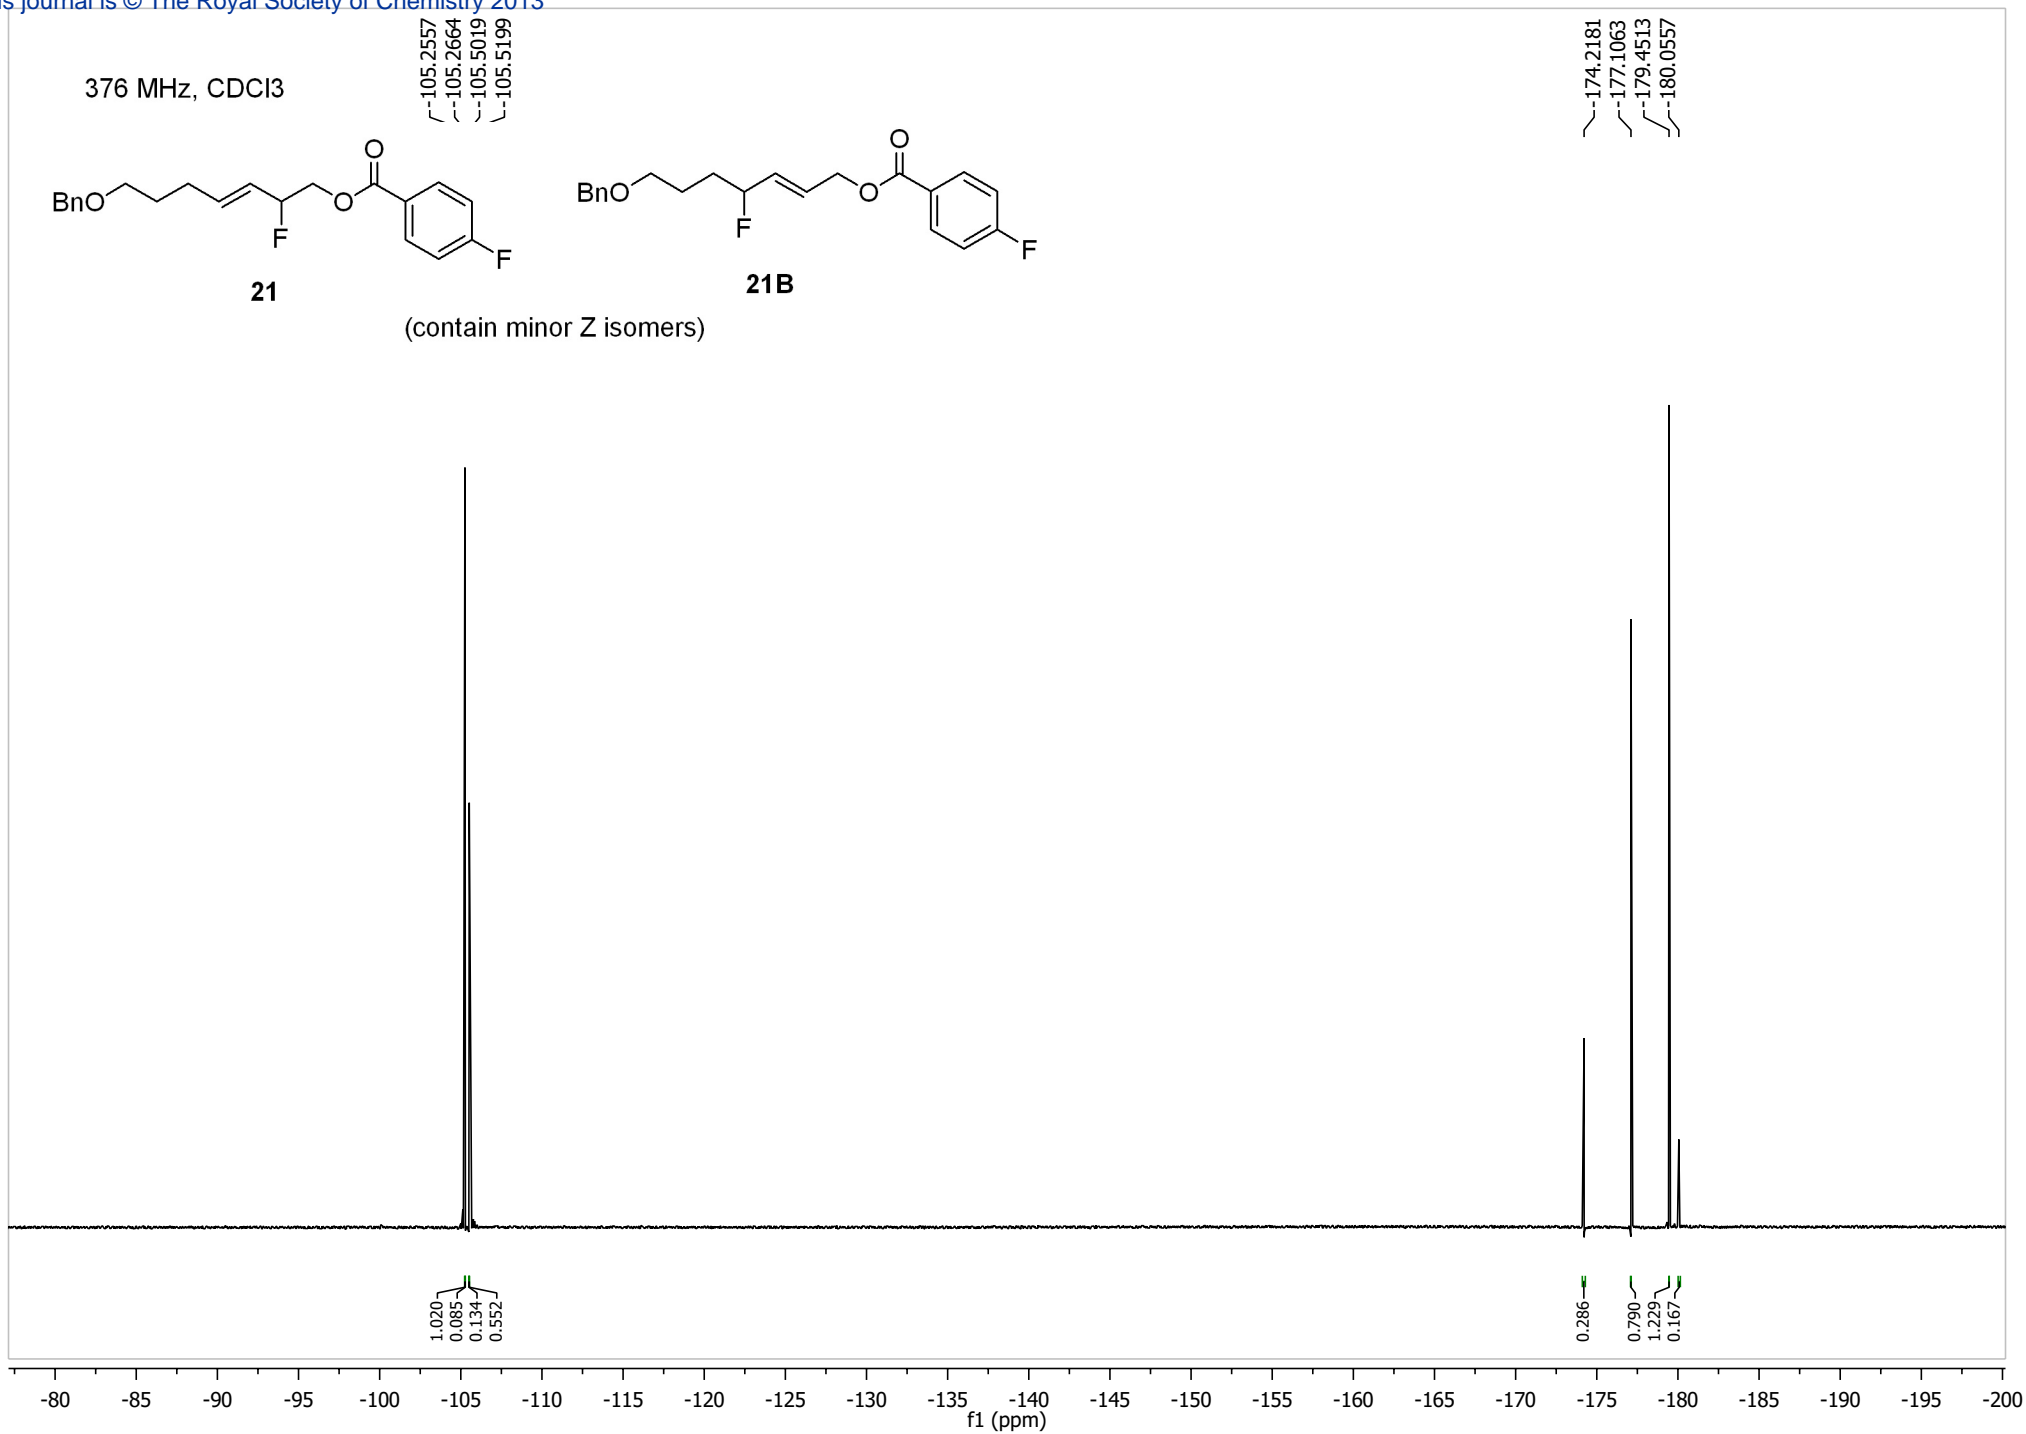



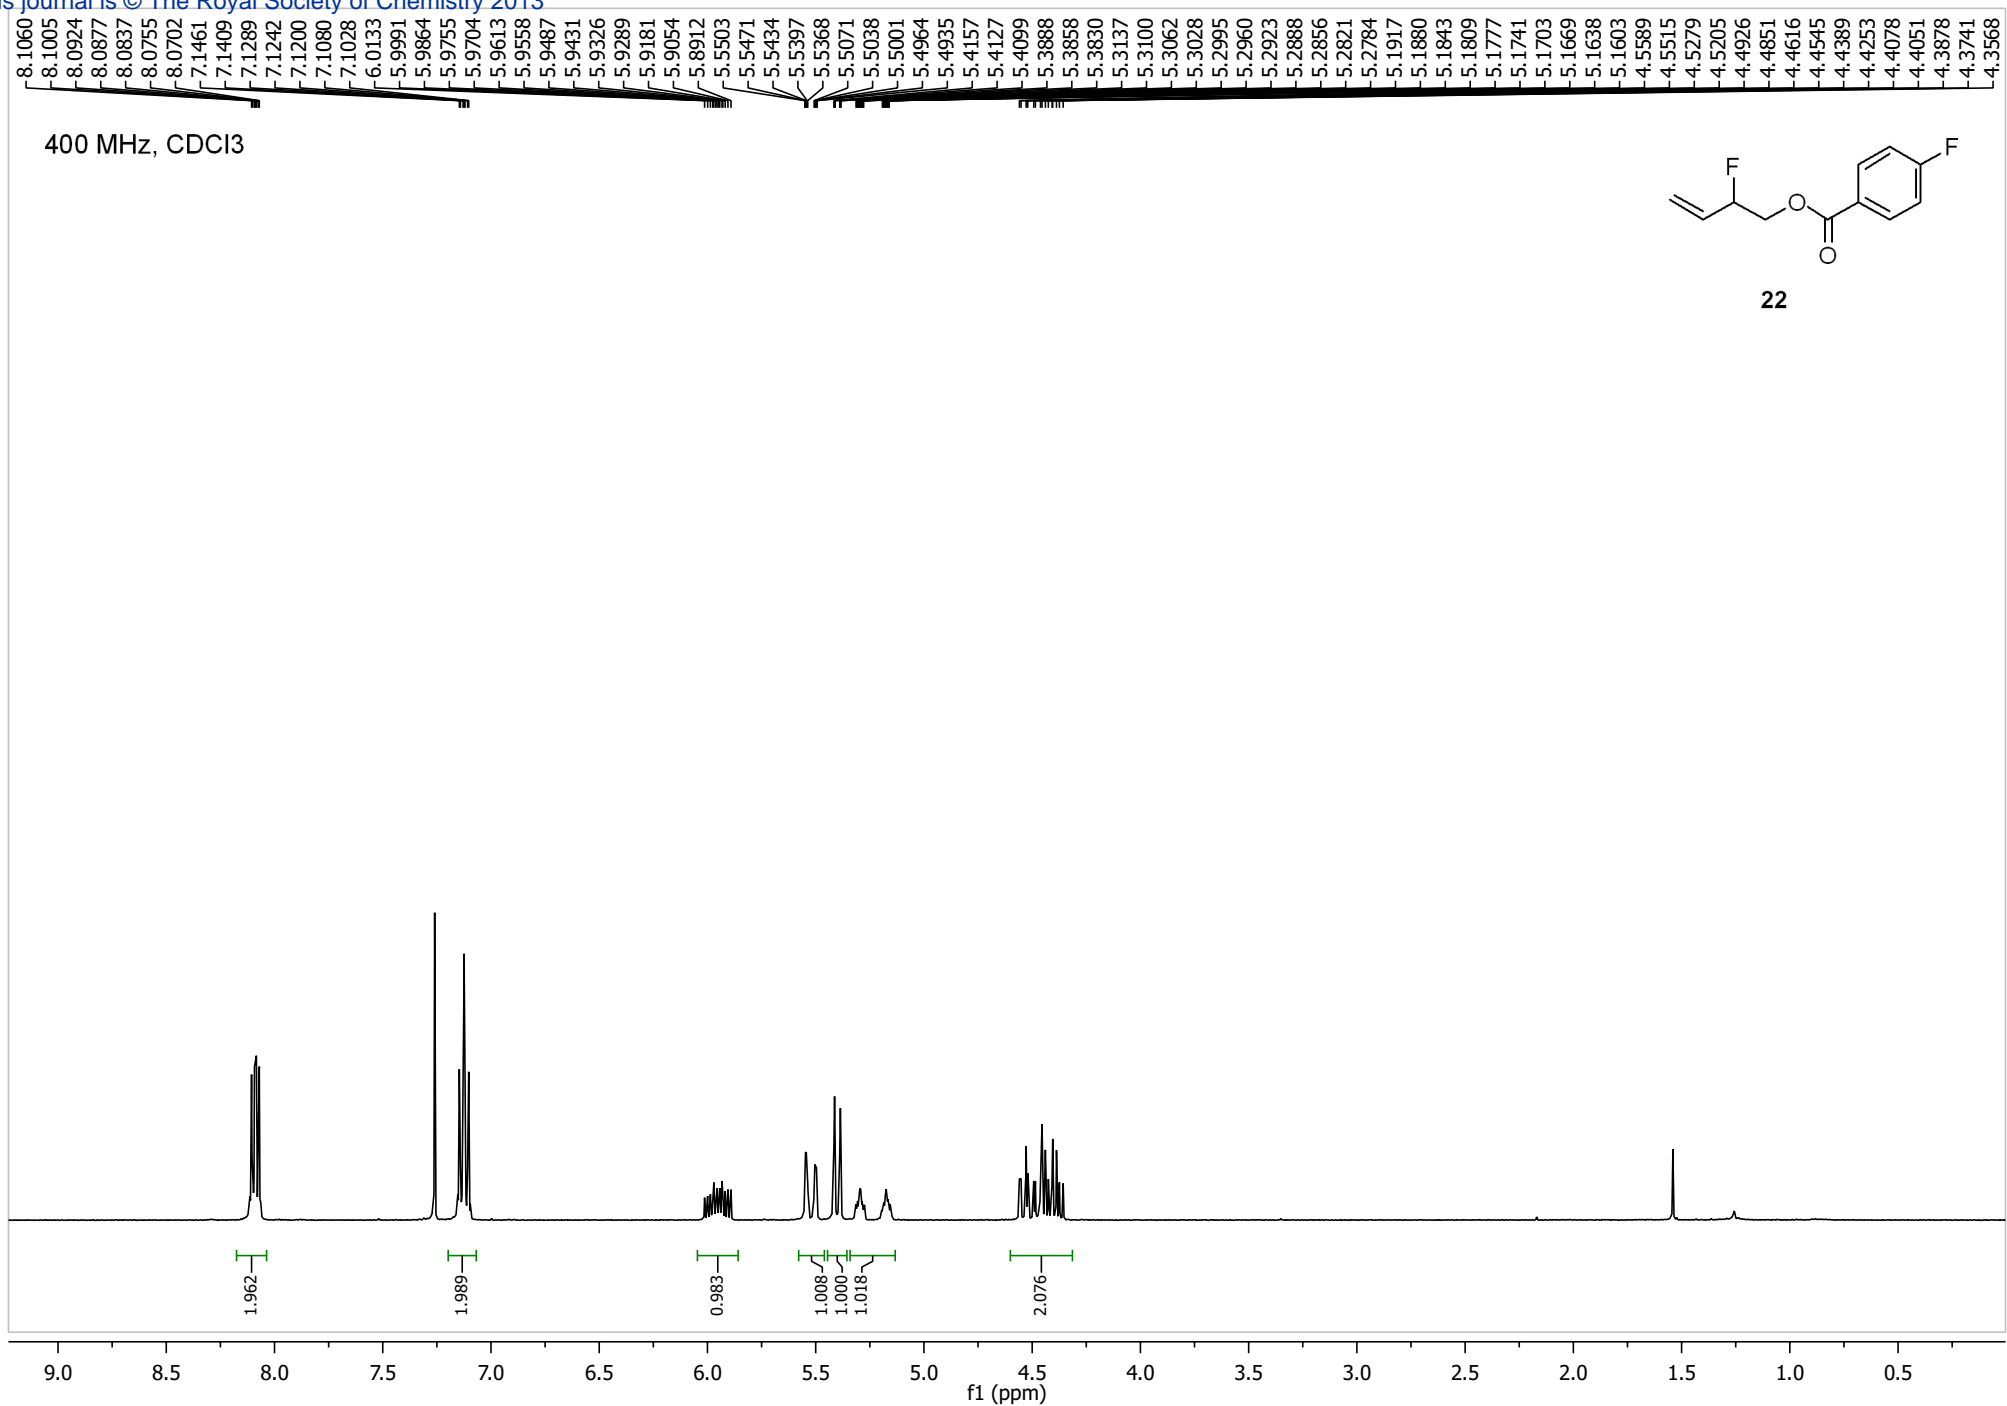

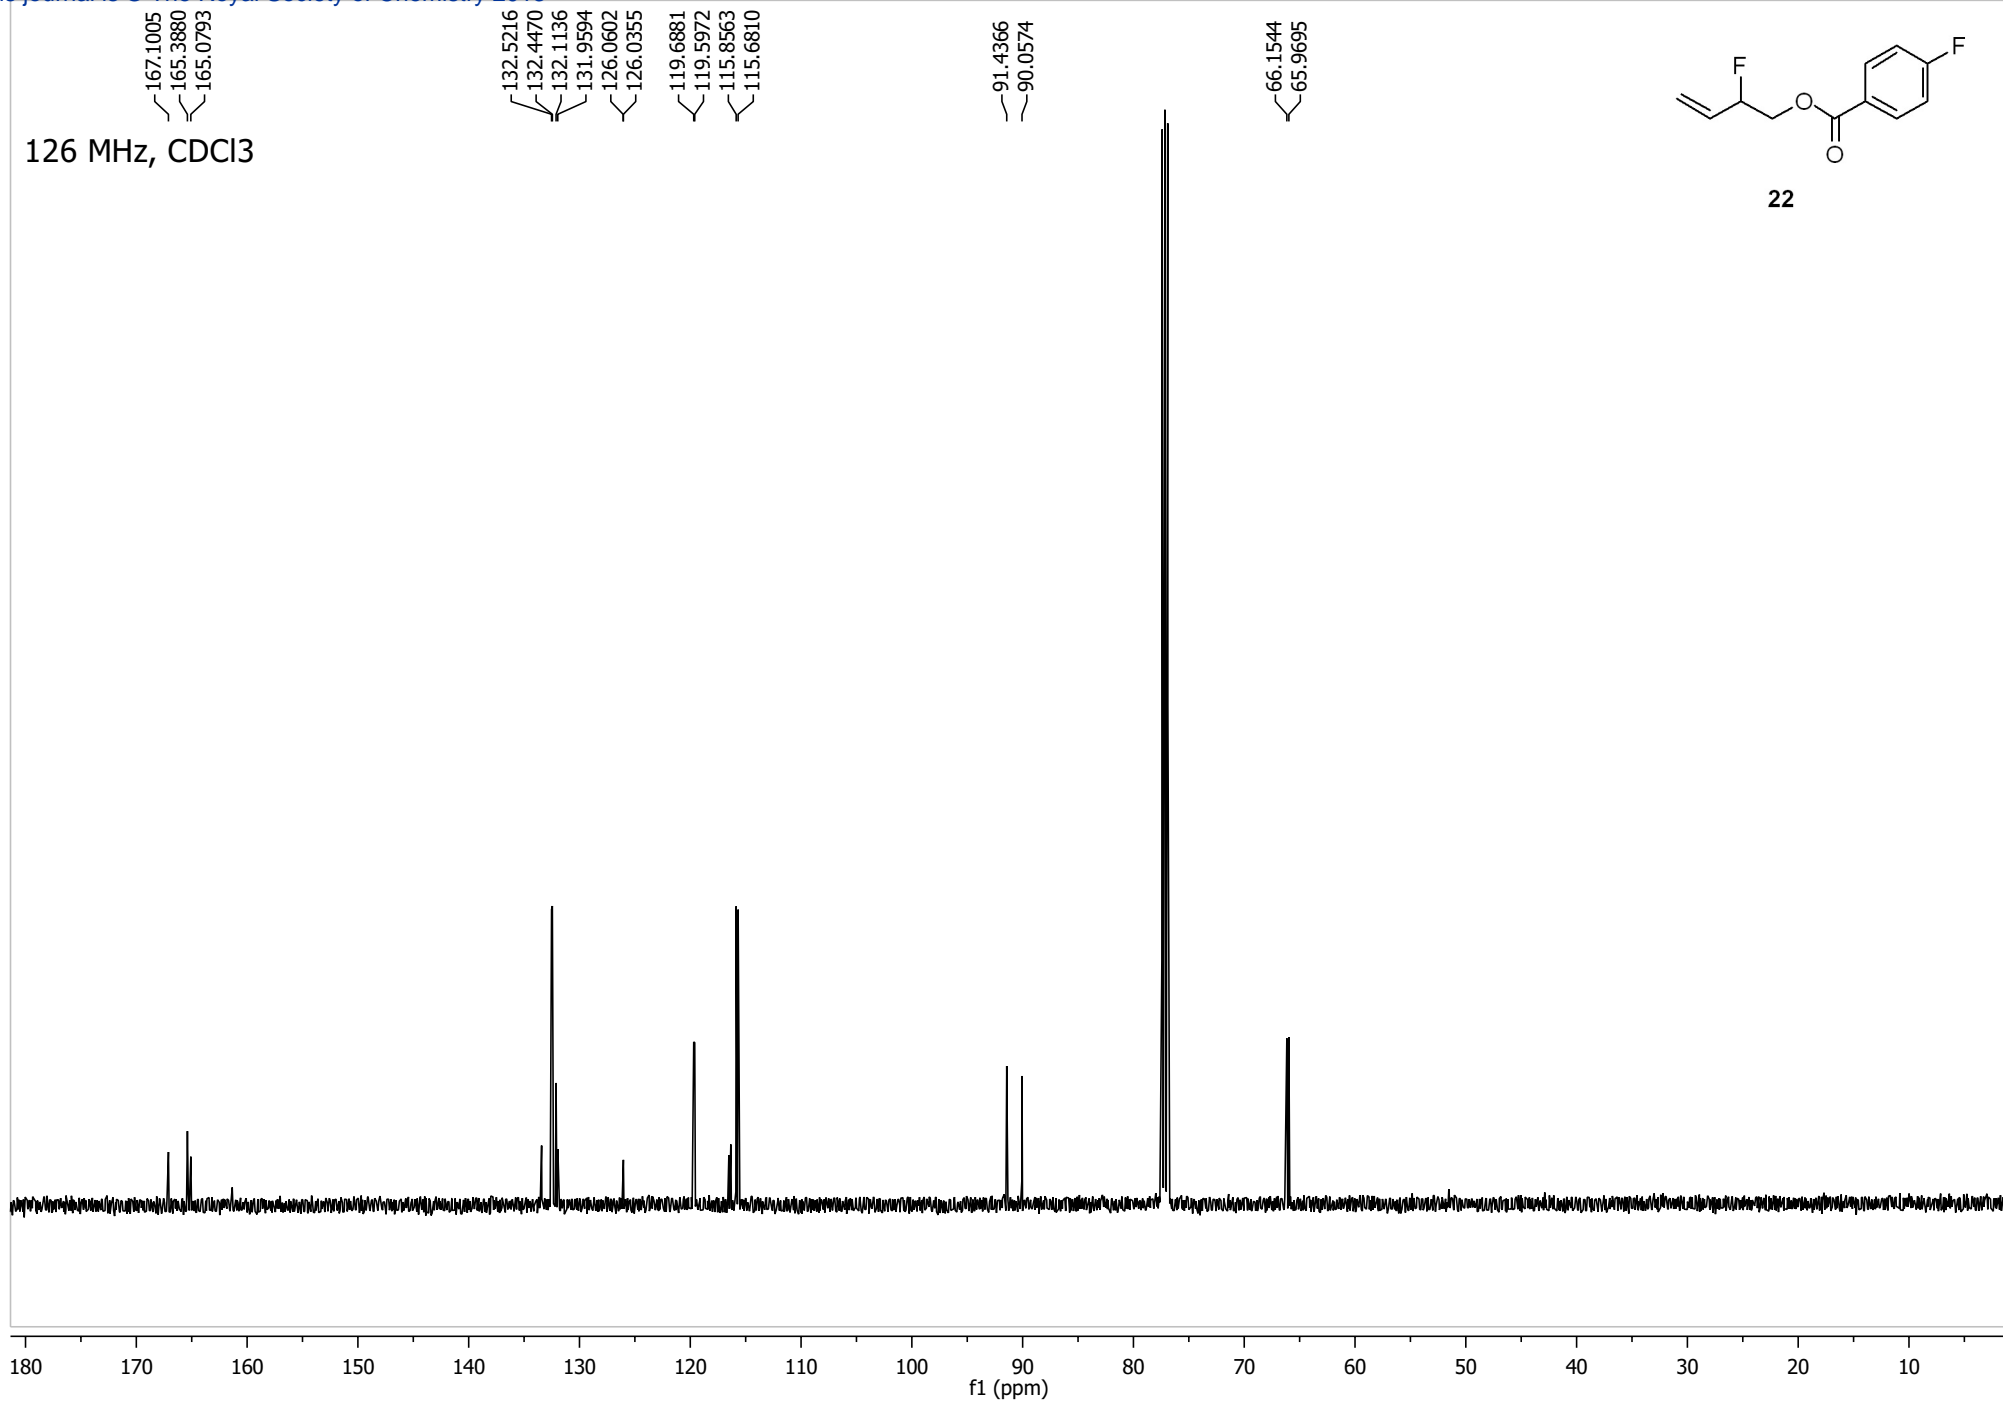

CDCl<sub>3</sub>, 471 MHz

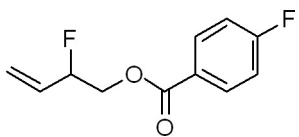

22

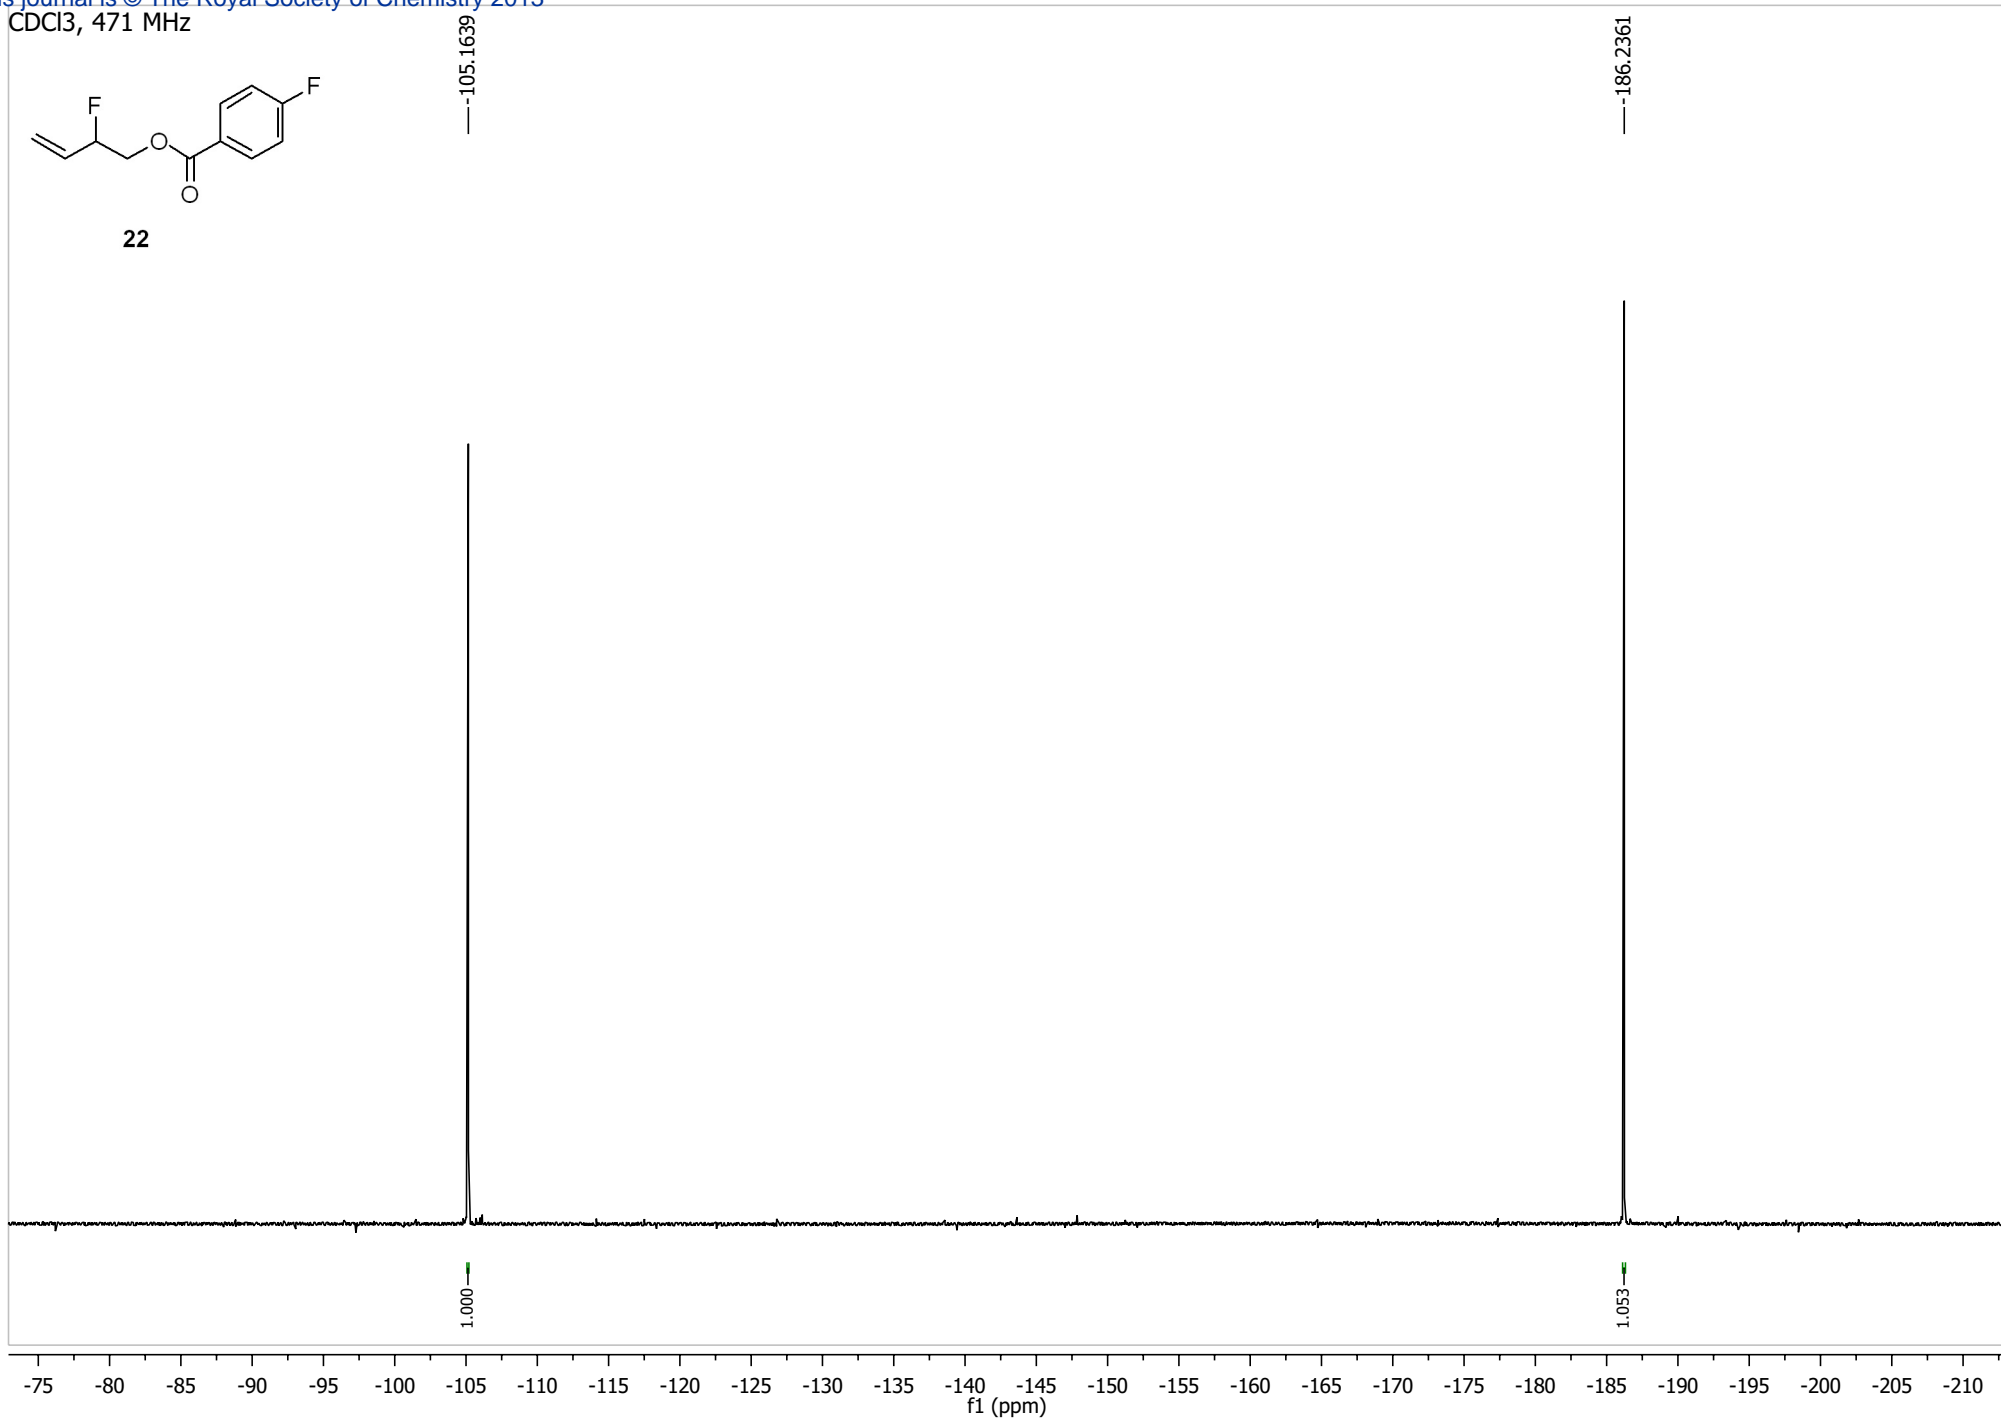

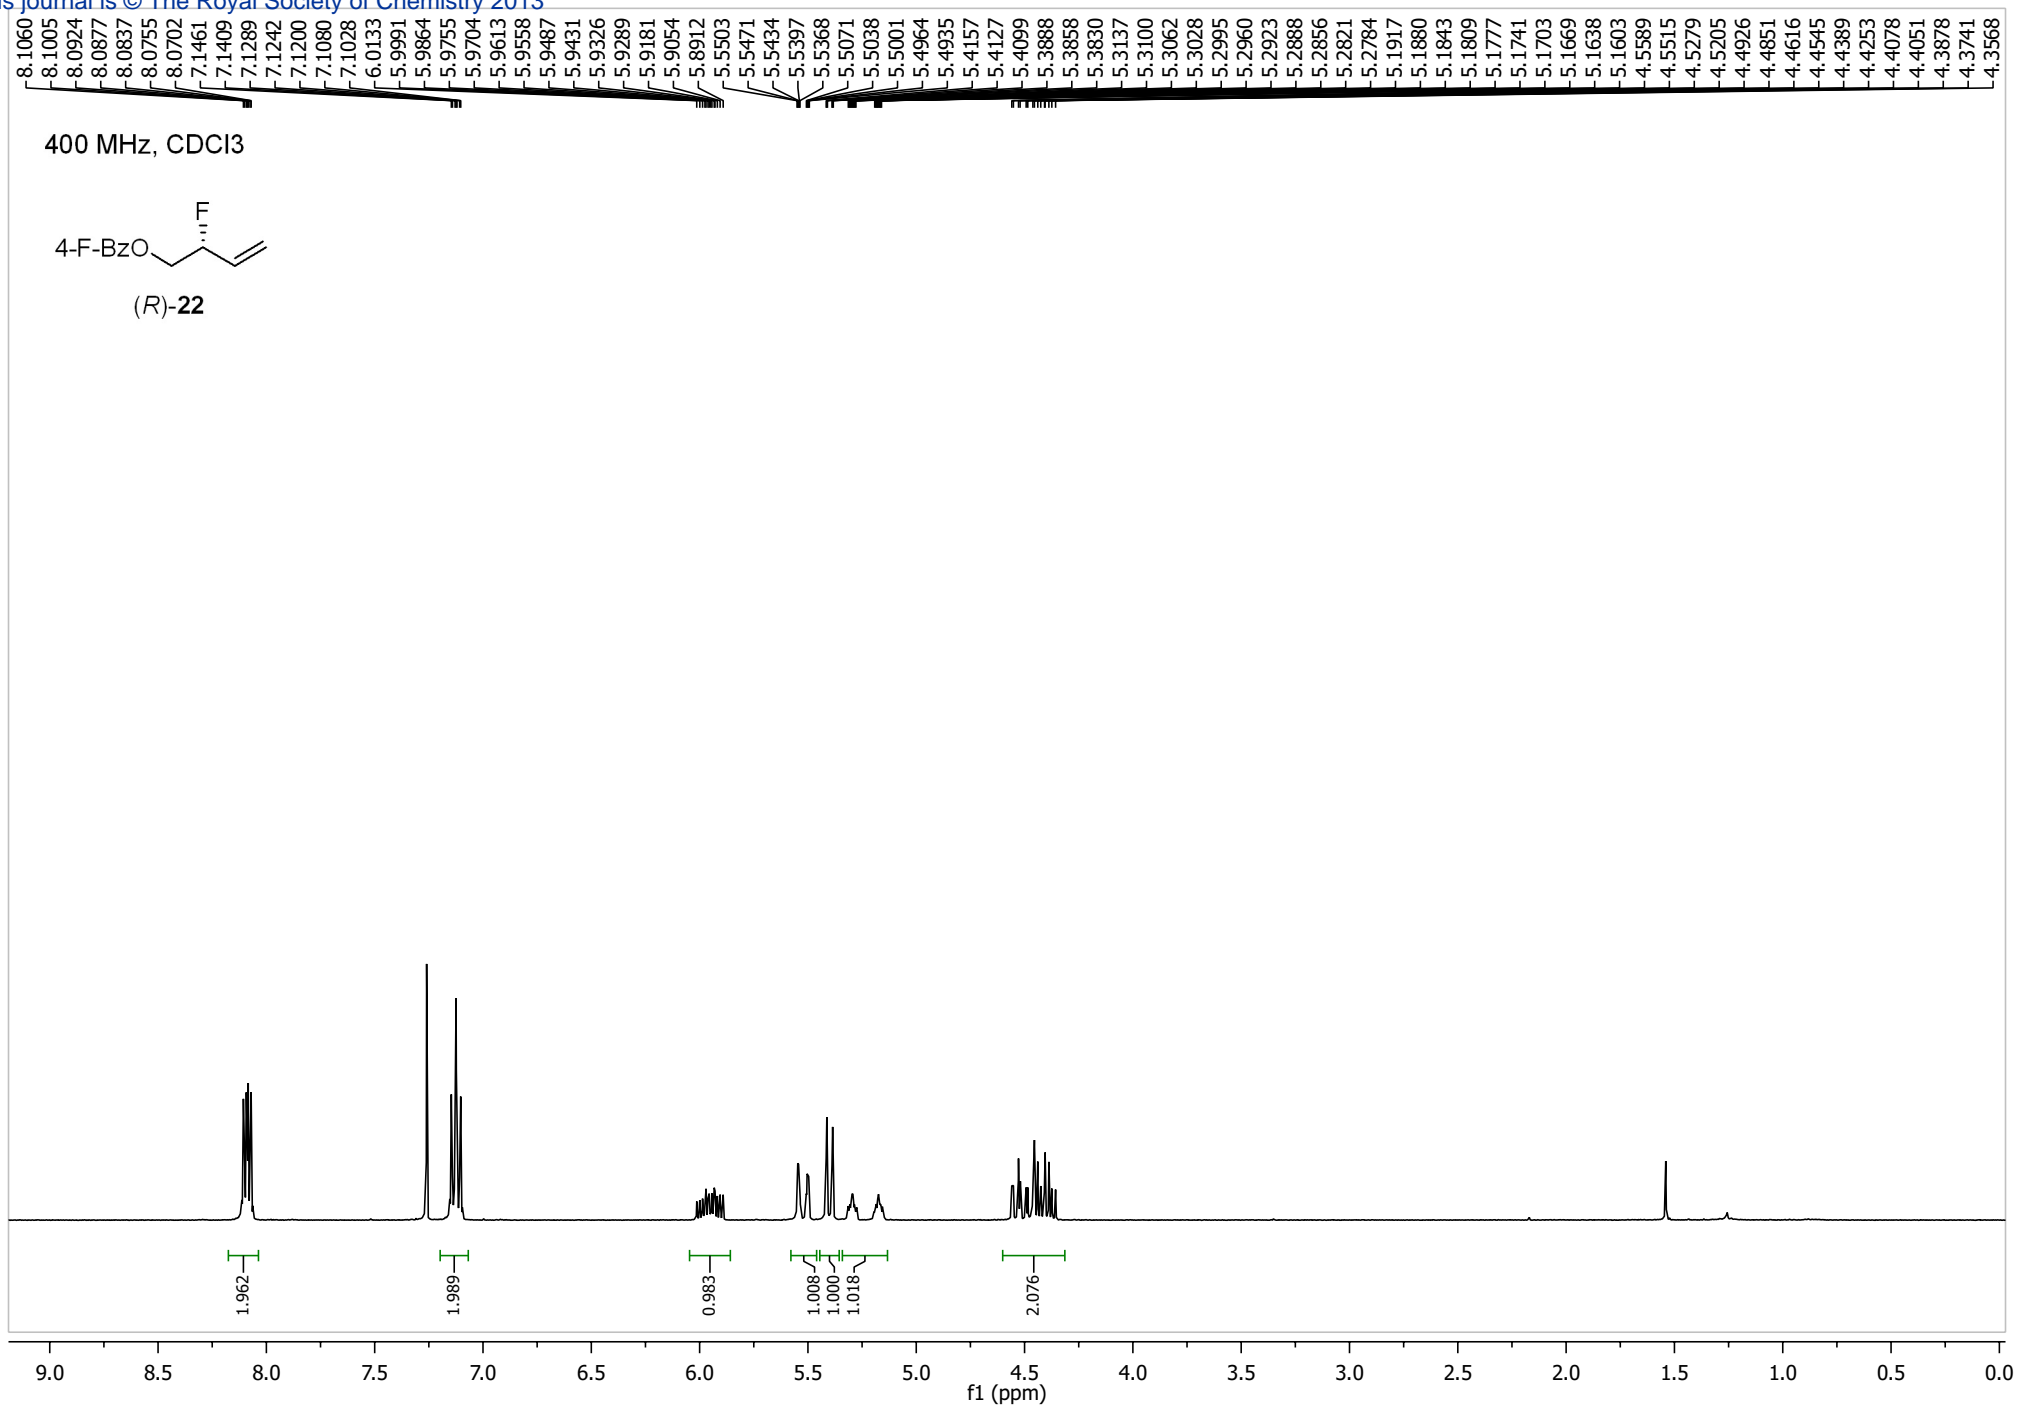

CDCl<sub>3</sub>, 471 MHz

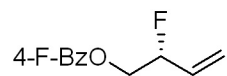

(*R*)-**22**

105.1639

186.2361

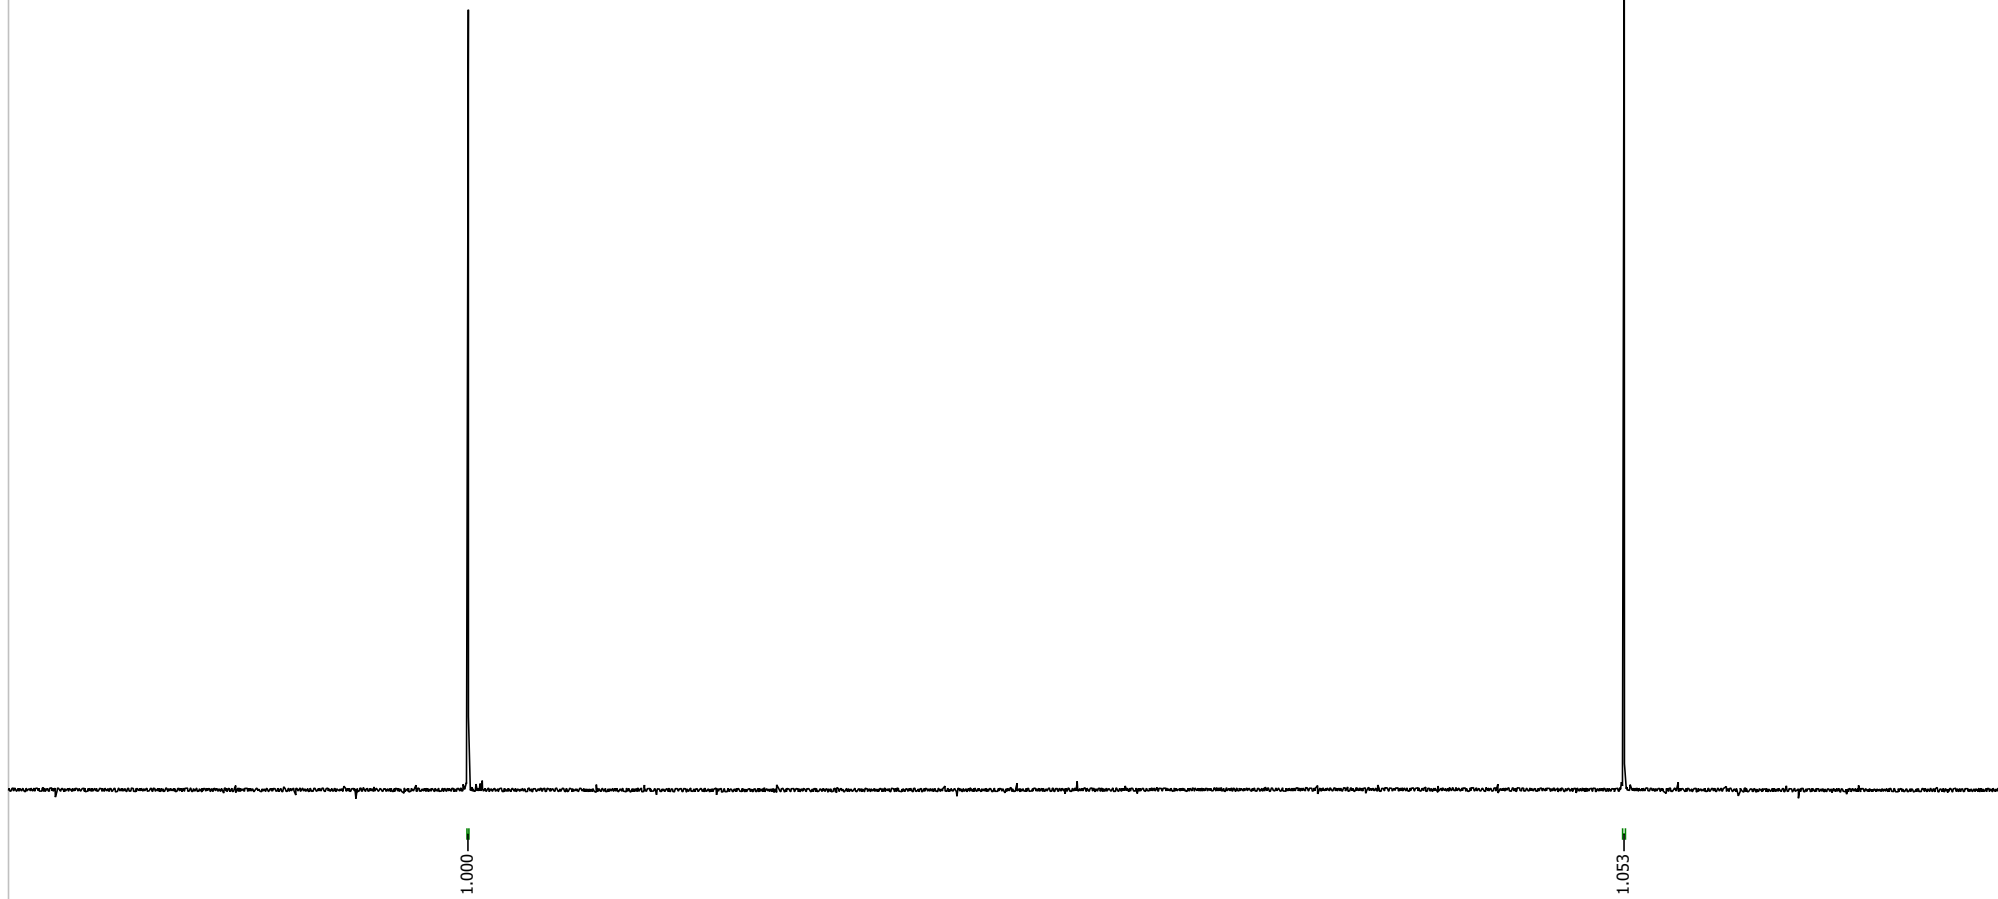

f1 (ppm)

400 MHz, CDCl<sub>3</sub>

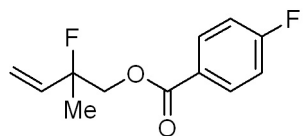

23

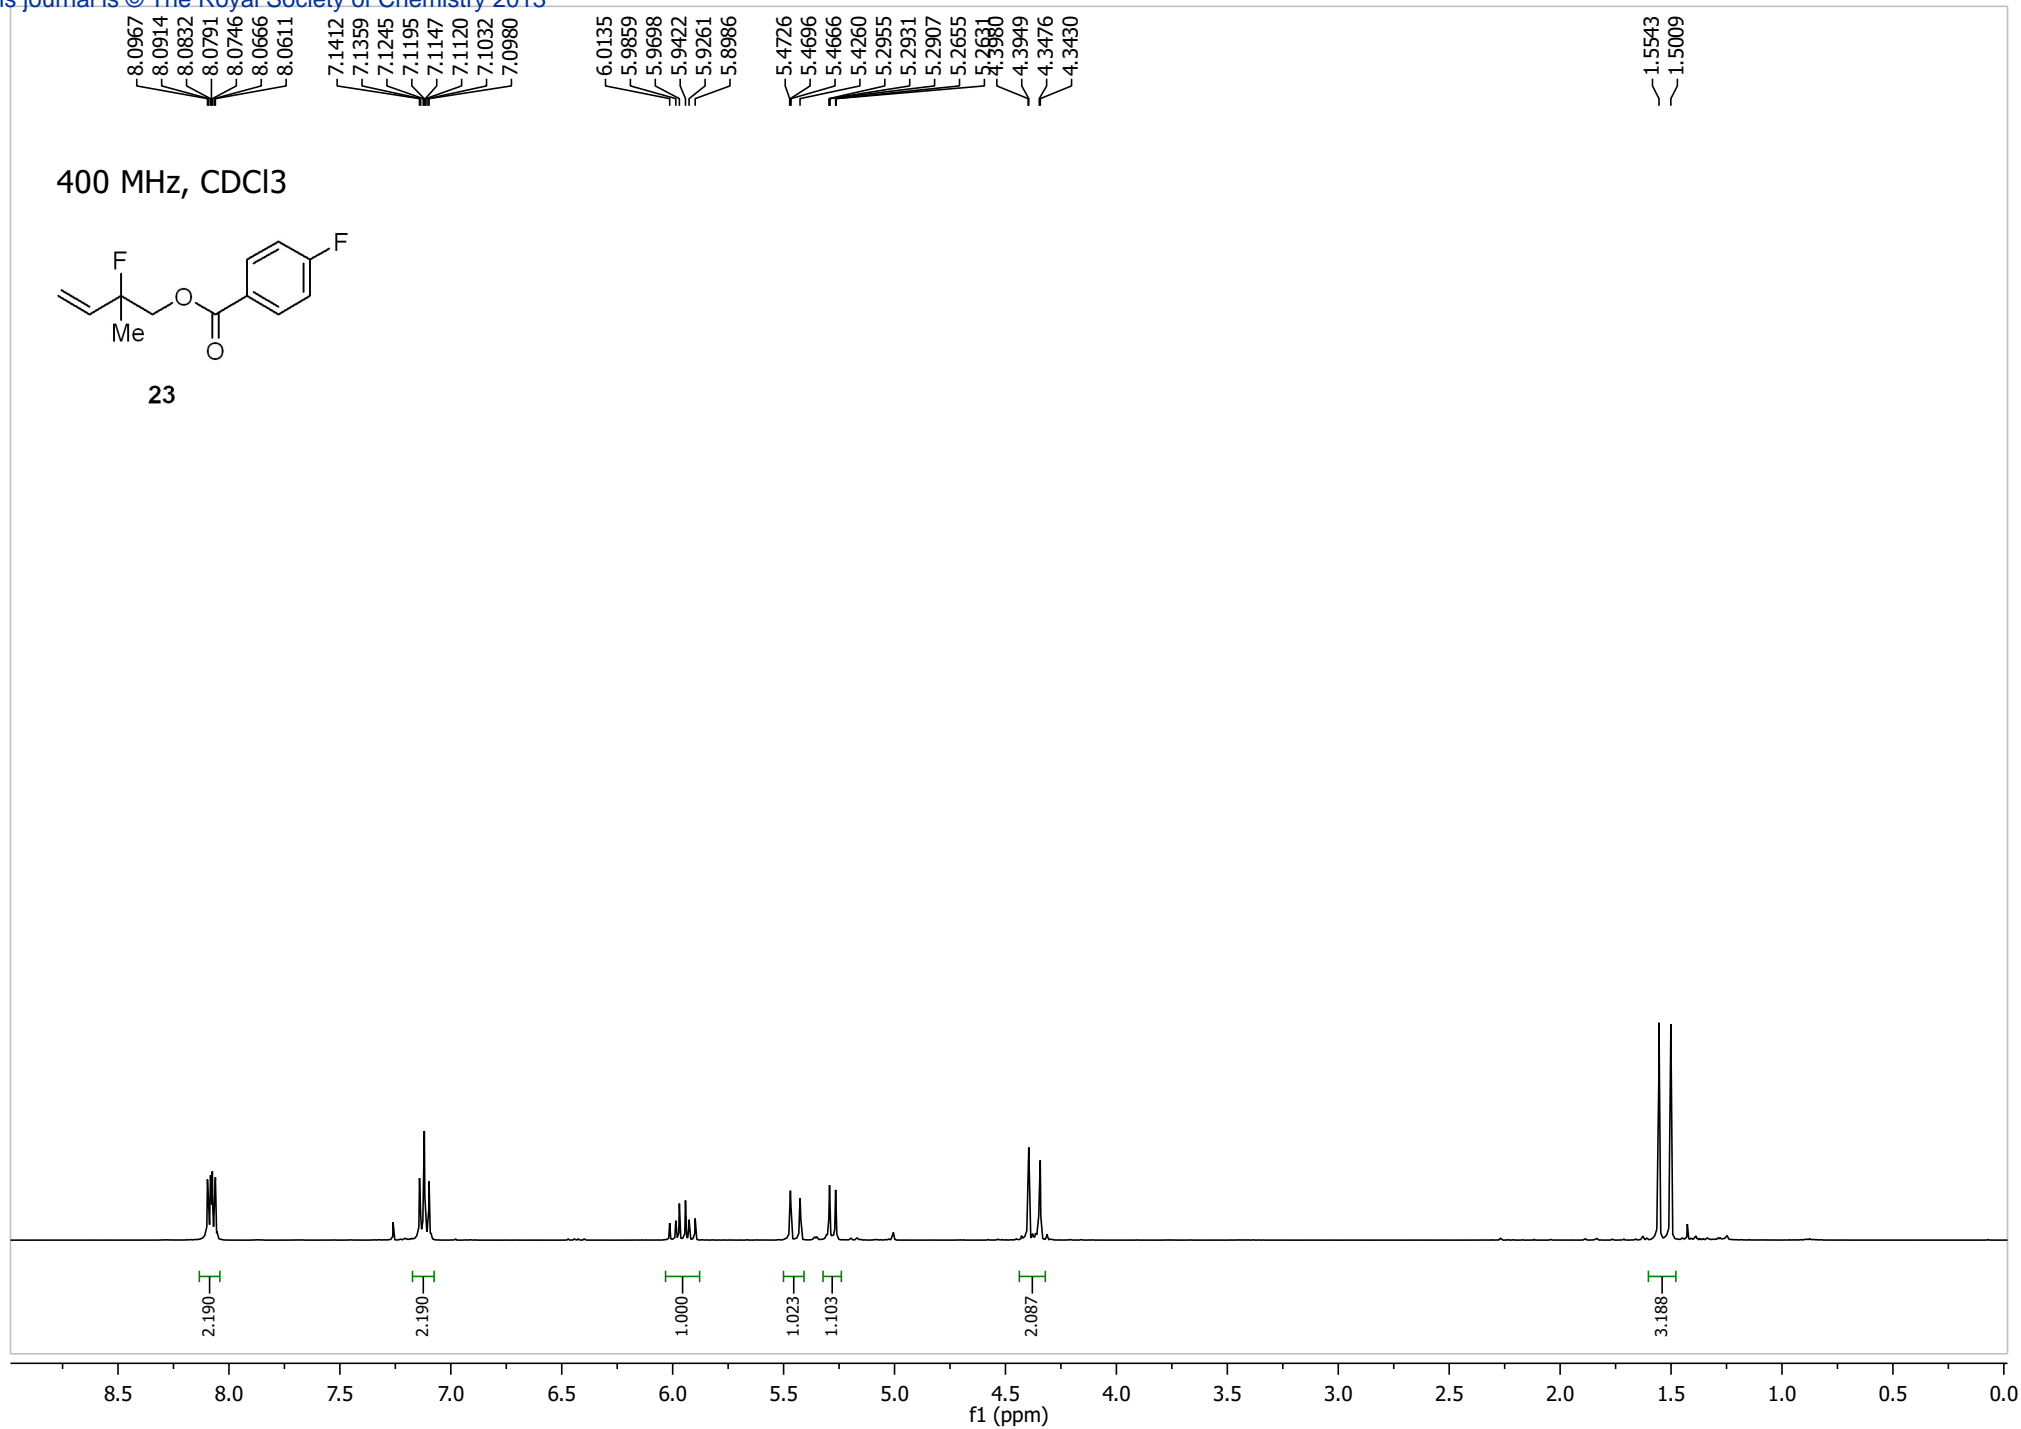

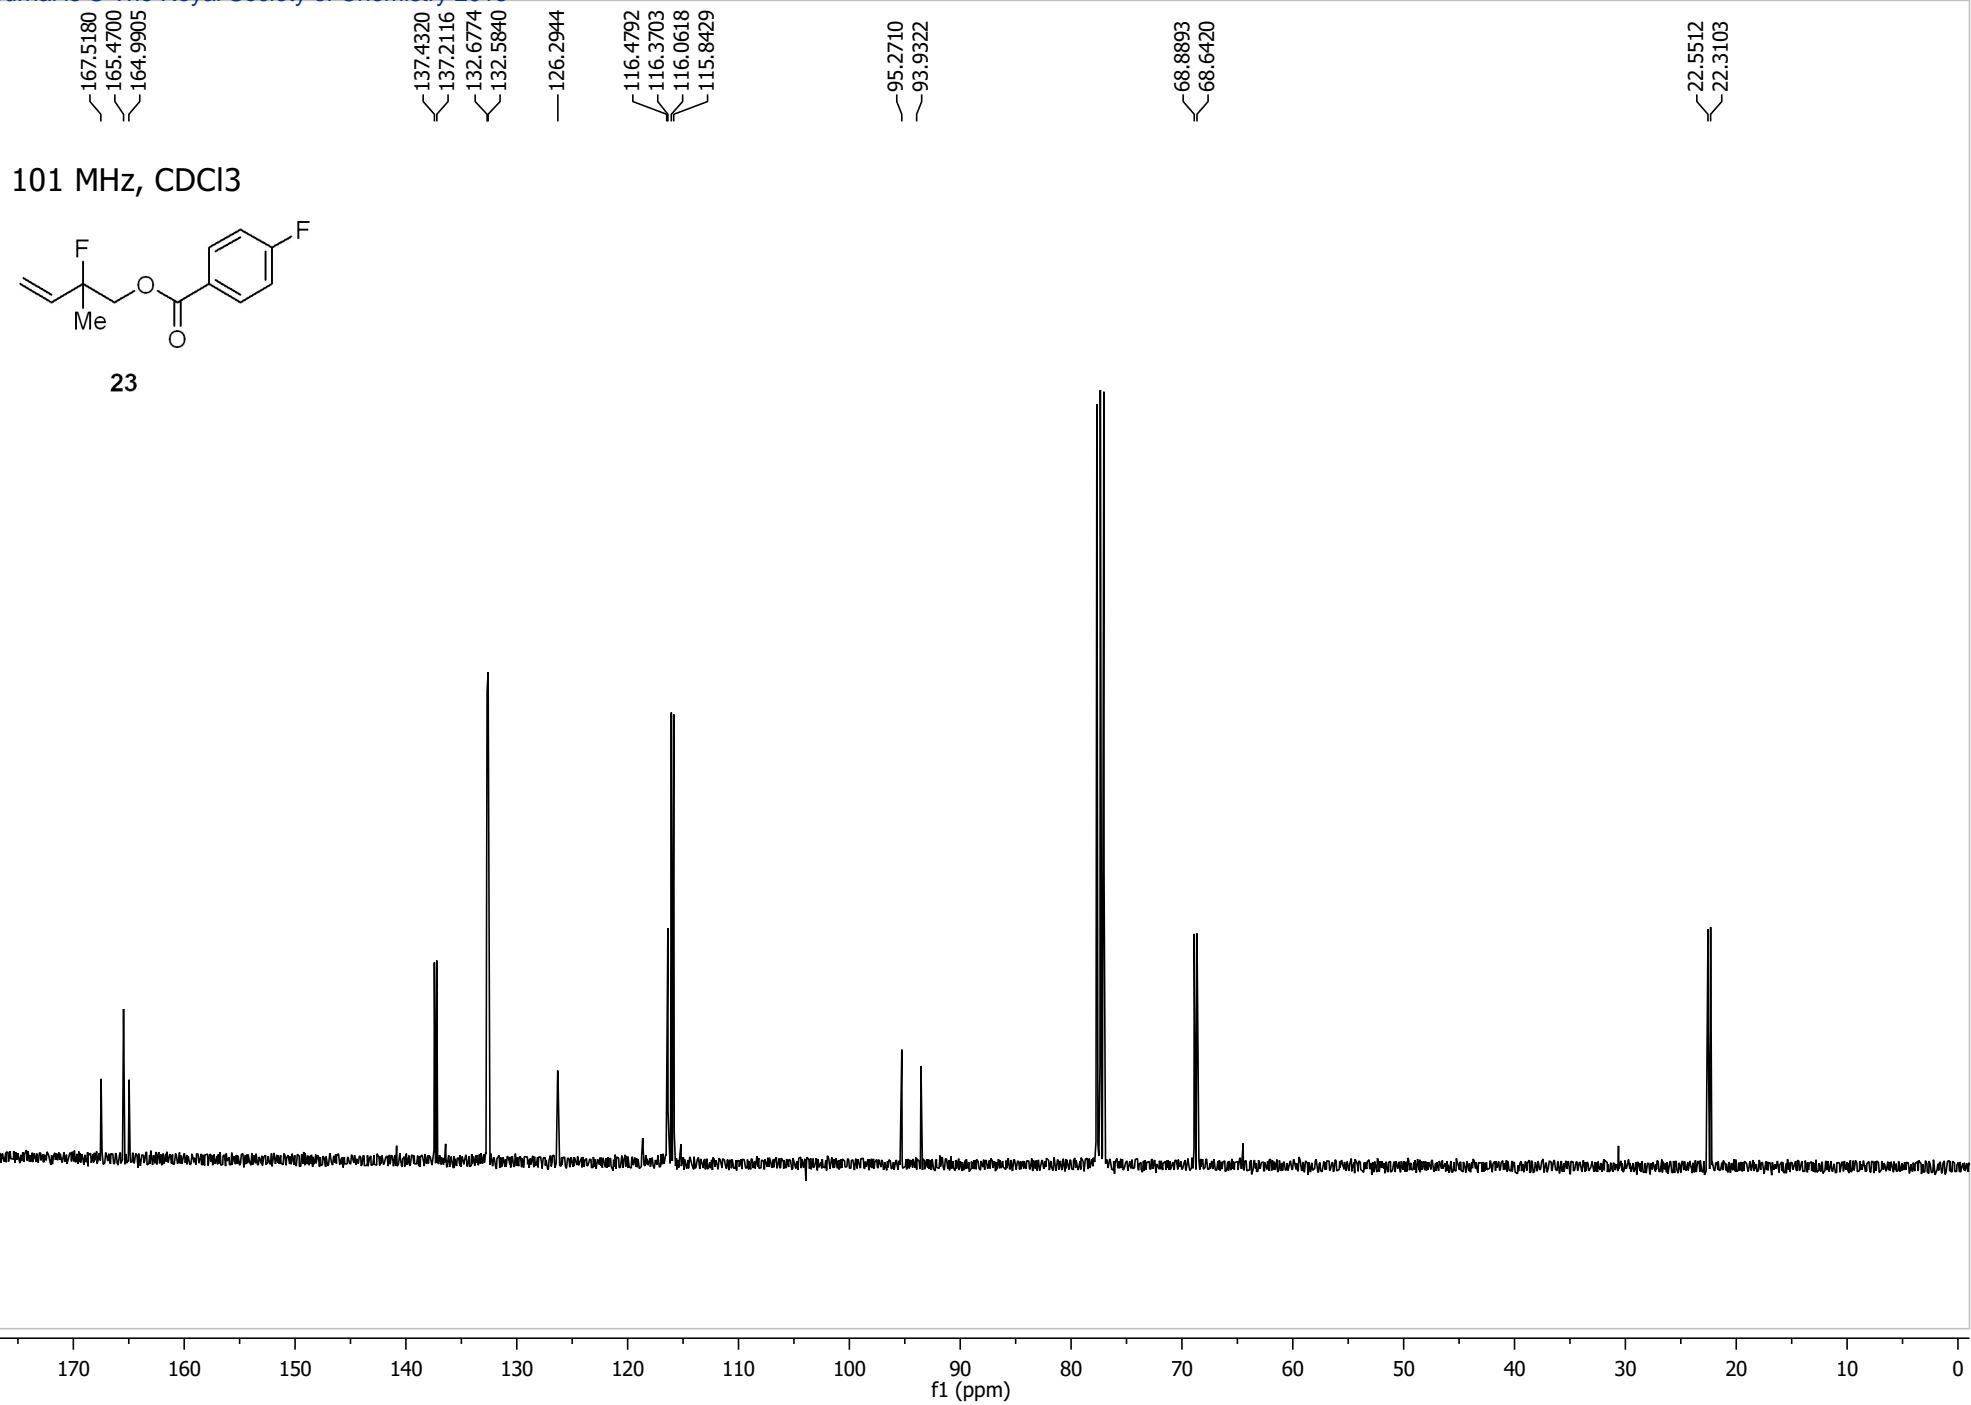

CDCl<sub>3</sub>, 471 MHz

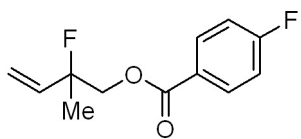

23

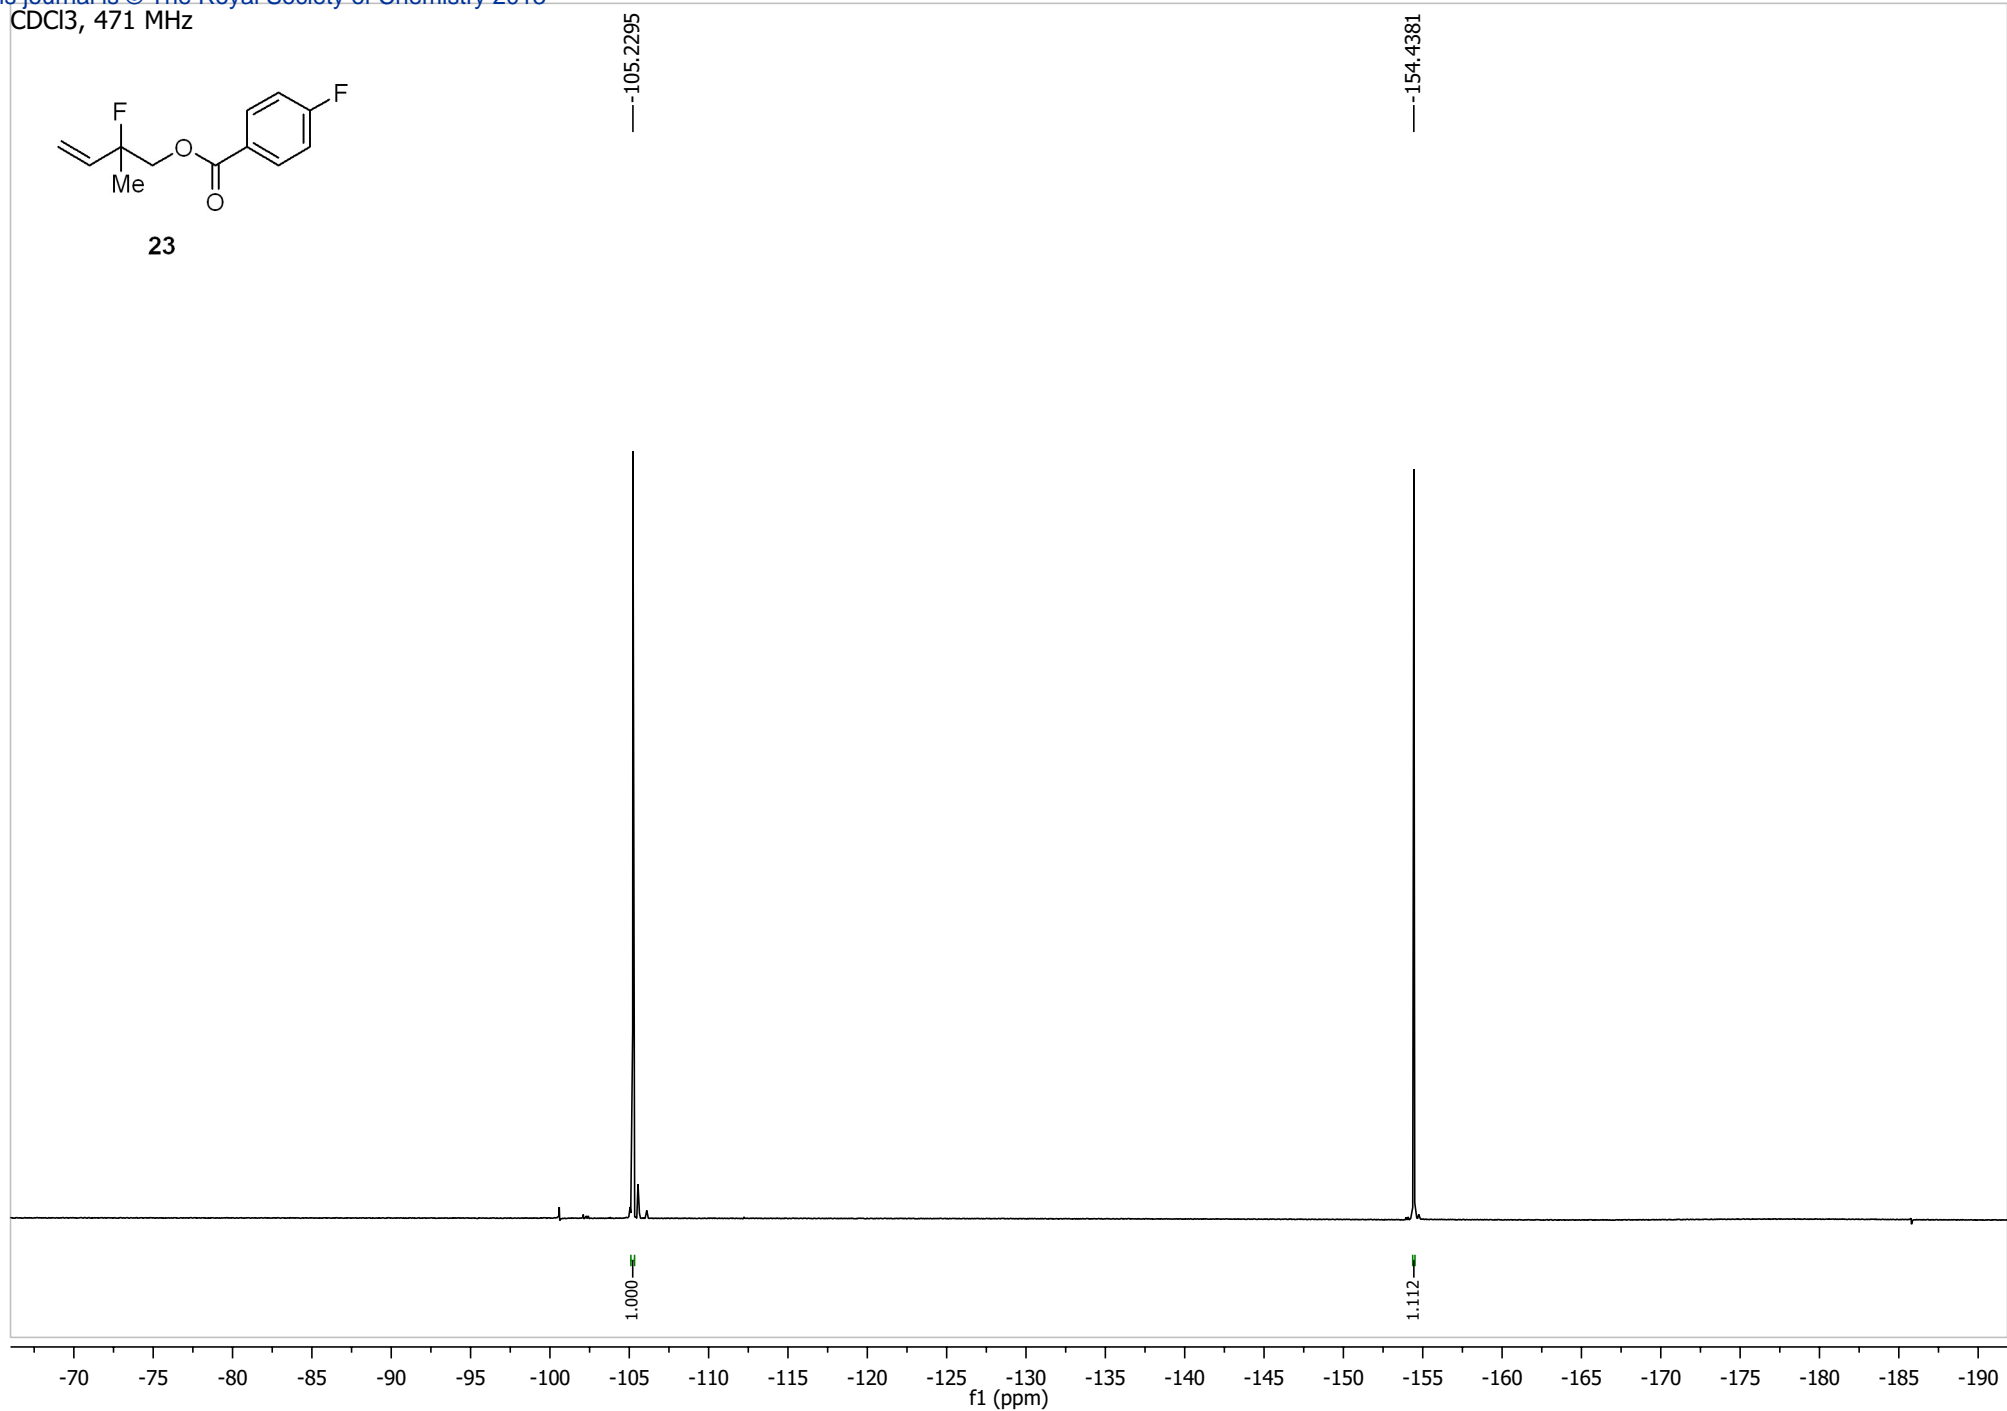



400 MHz, CDCl<sub>3</sub>

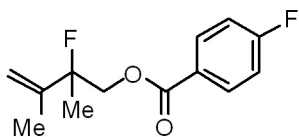

24

8.0890  
8.0835  
8.0753  
8.0719  
8.0700  
8.0666  
8.0583  
8.0530  
7.1389  
7.1335  
7.1218  
7.1179  
7.1165  
7.1124  
7.1007  
7.0955

5.1285  
5.1259  
5.1234  
5.0199  
5.0161  
5.0124  
5.0089  
5.0064  
5.0030  
4.9994  
4.9958  
4.4586  
4.4553  
4.4058  
4.4027

1.8424  
1.8399  
1.8380  
1.8361  
1.8337  
1.5726  
1.5179

2.072

2.070

1.000

1.004

1.955

2.958

3.151

9.0 8.5 8.0 7.5 7.0 6.5 6.0 5.5 5.0 4.5 4.0 3.5 3.0 2.5 2.0 1.5 1.0 0.5 0.0  
f1 (ppm)

101 MHz, CDCl<sub>3</sub>

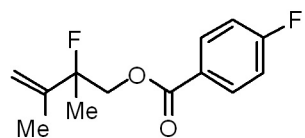

24

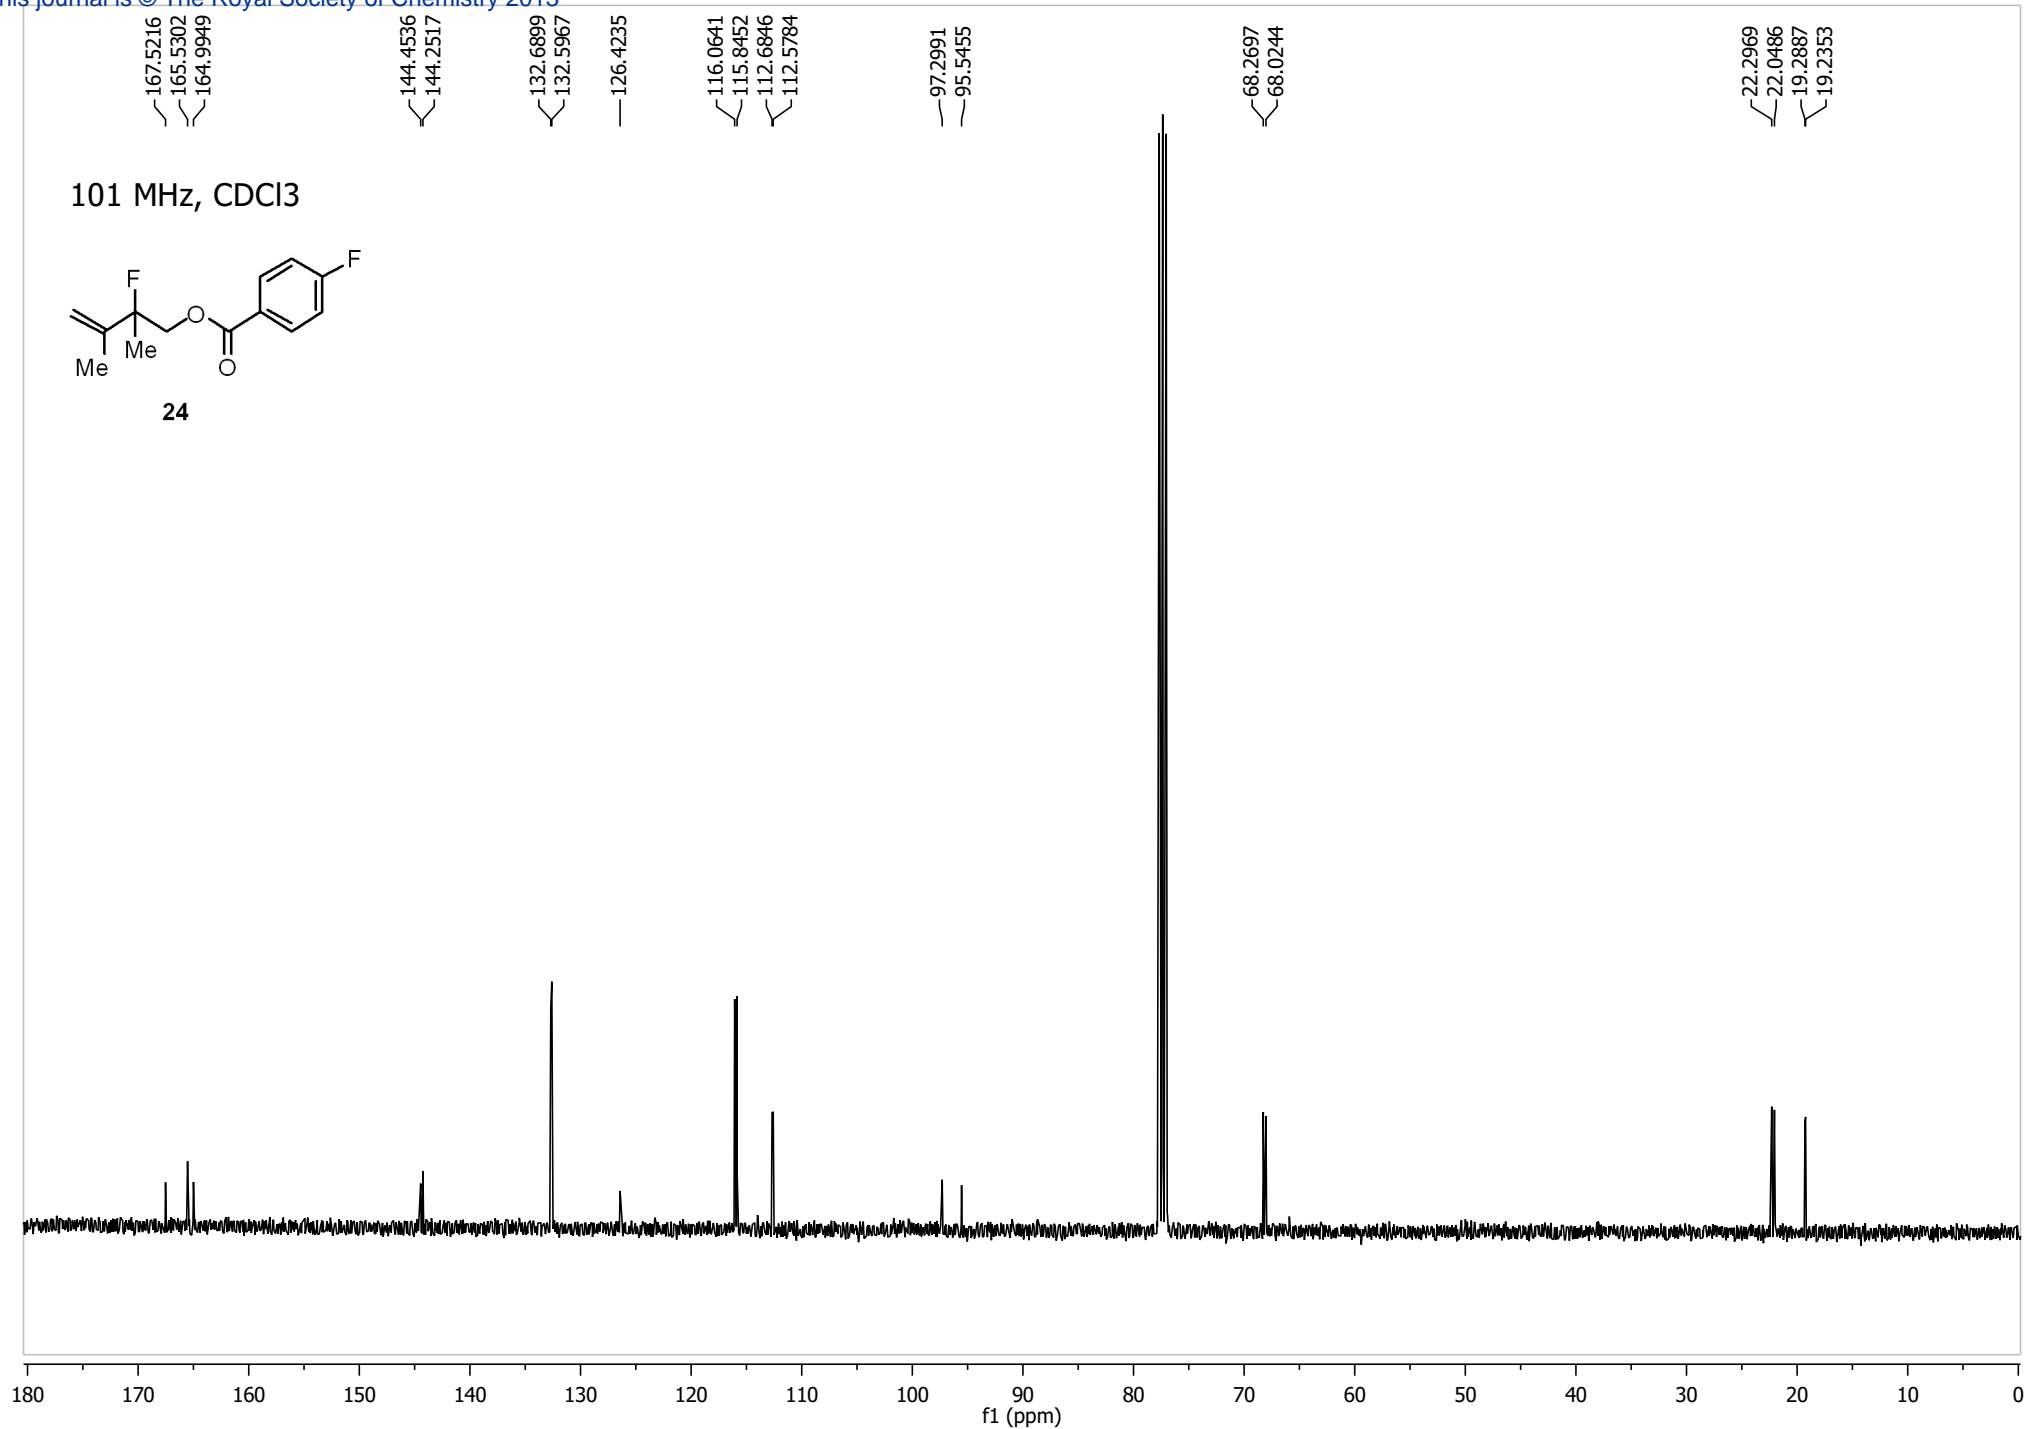

CDCl<sub>3</sub>, 376 MHz

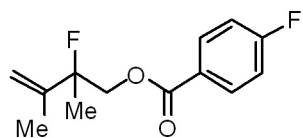

**24**

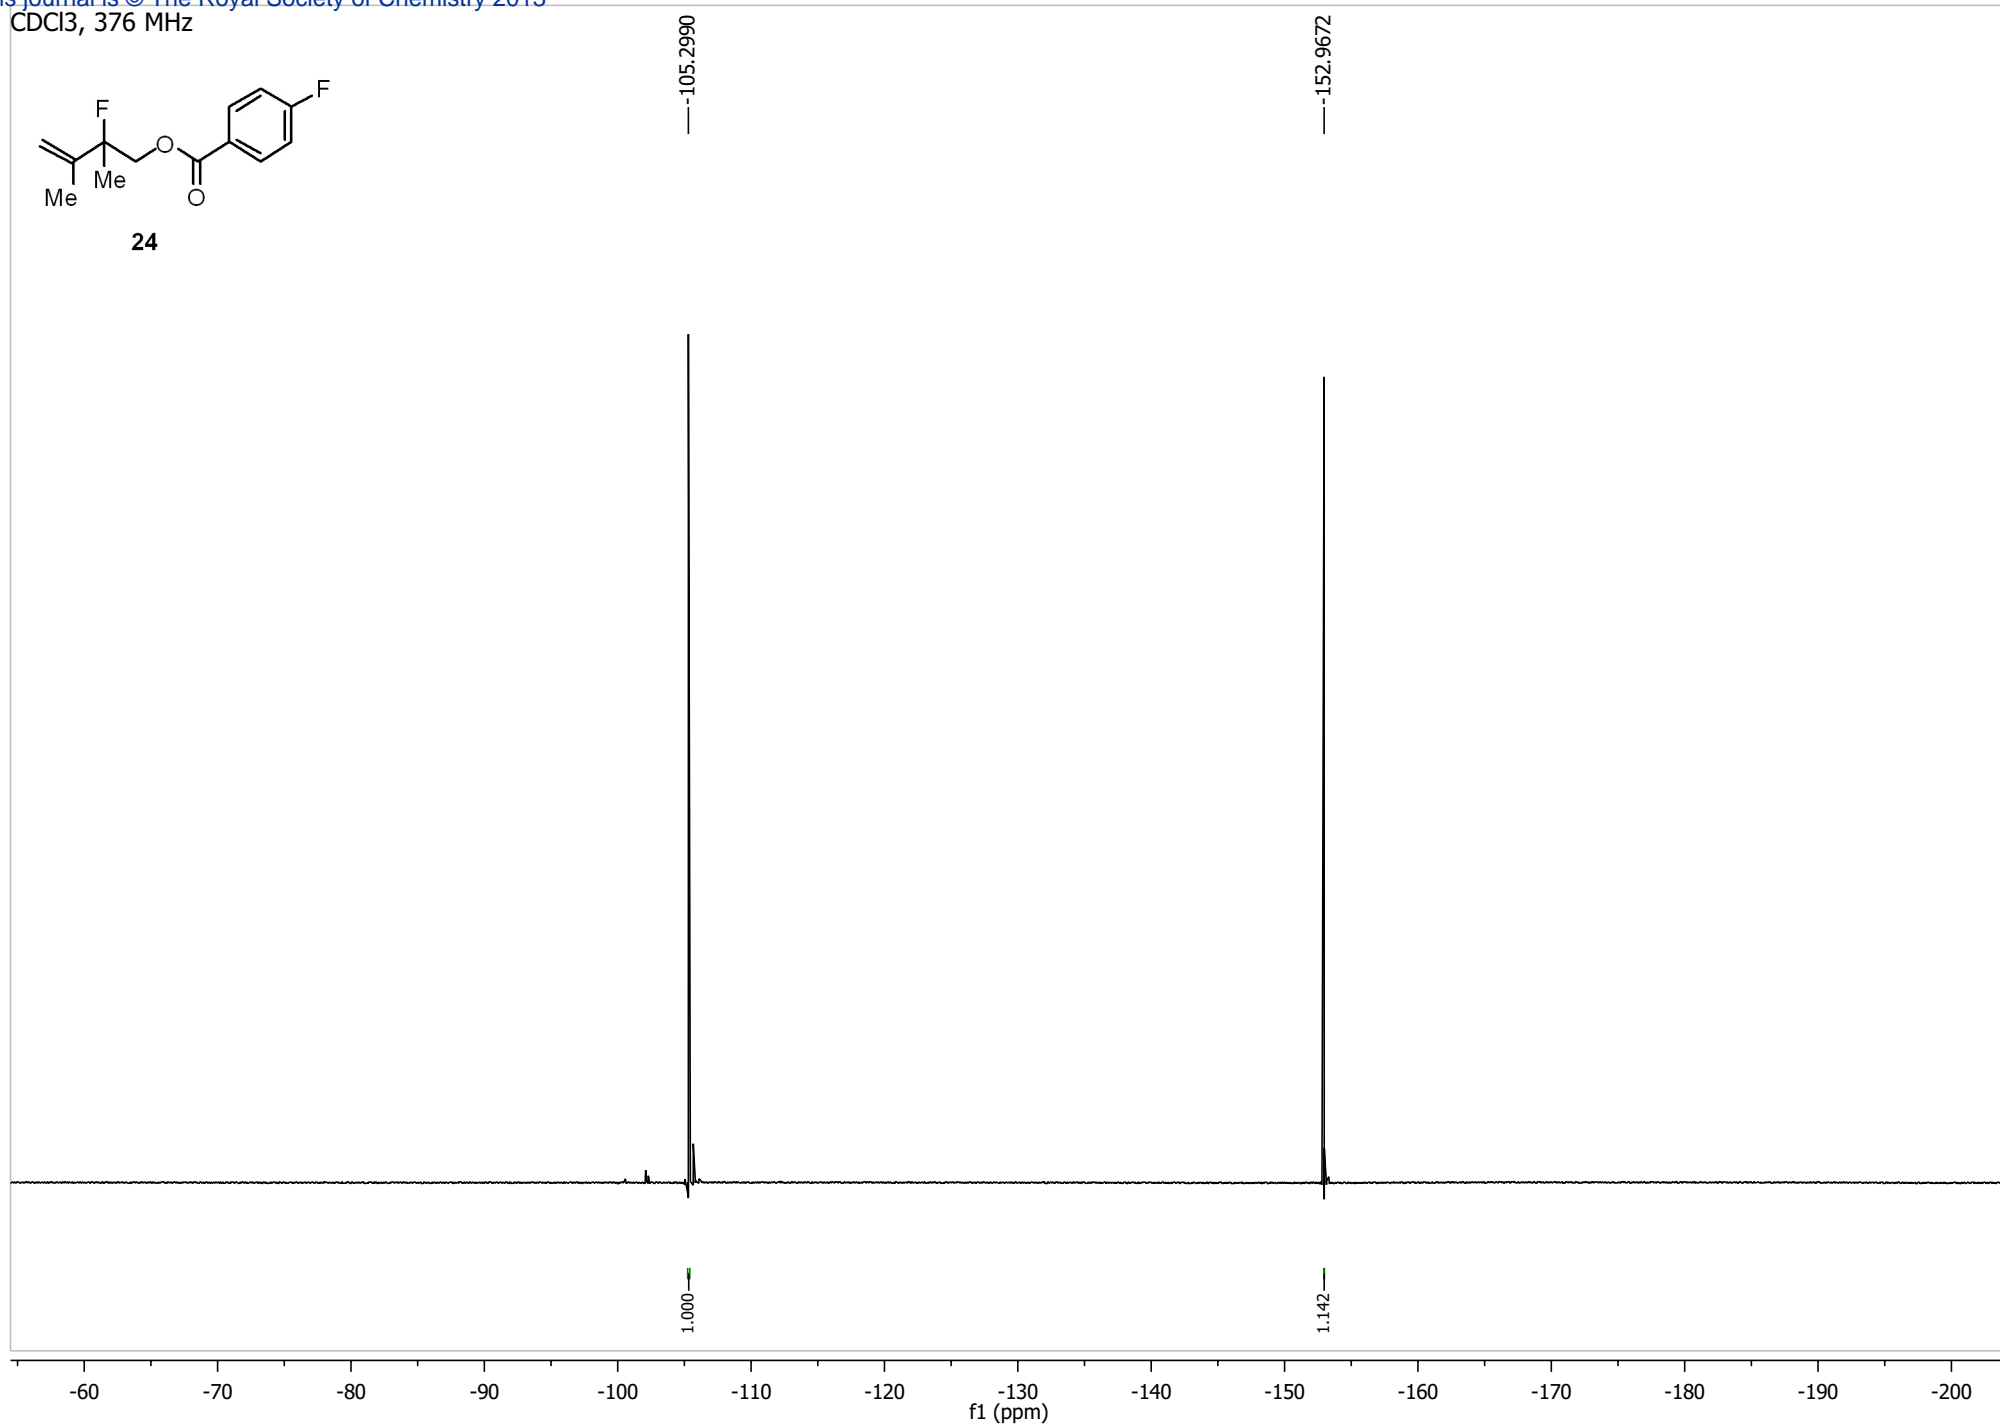

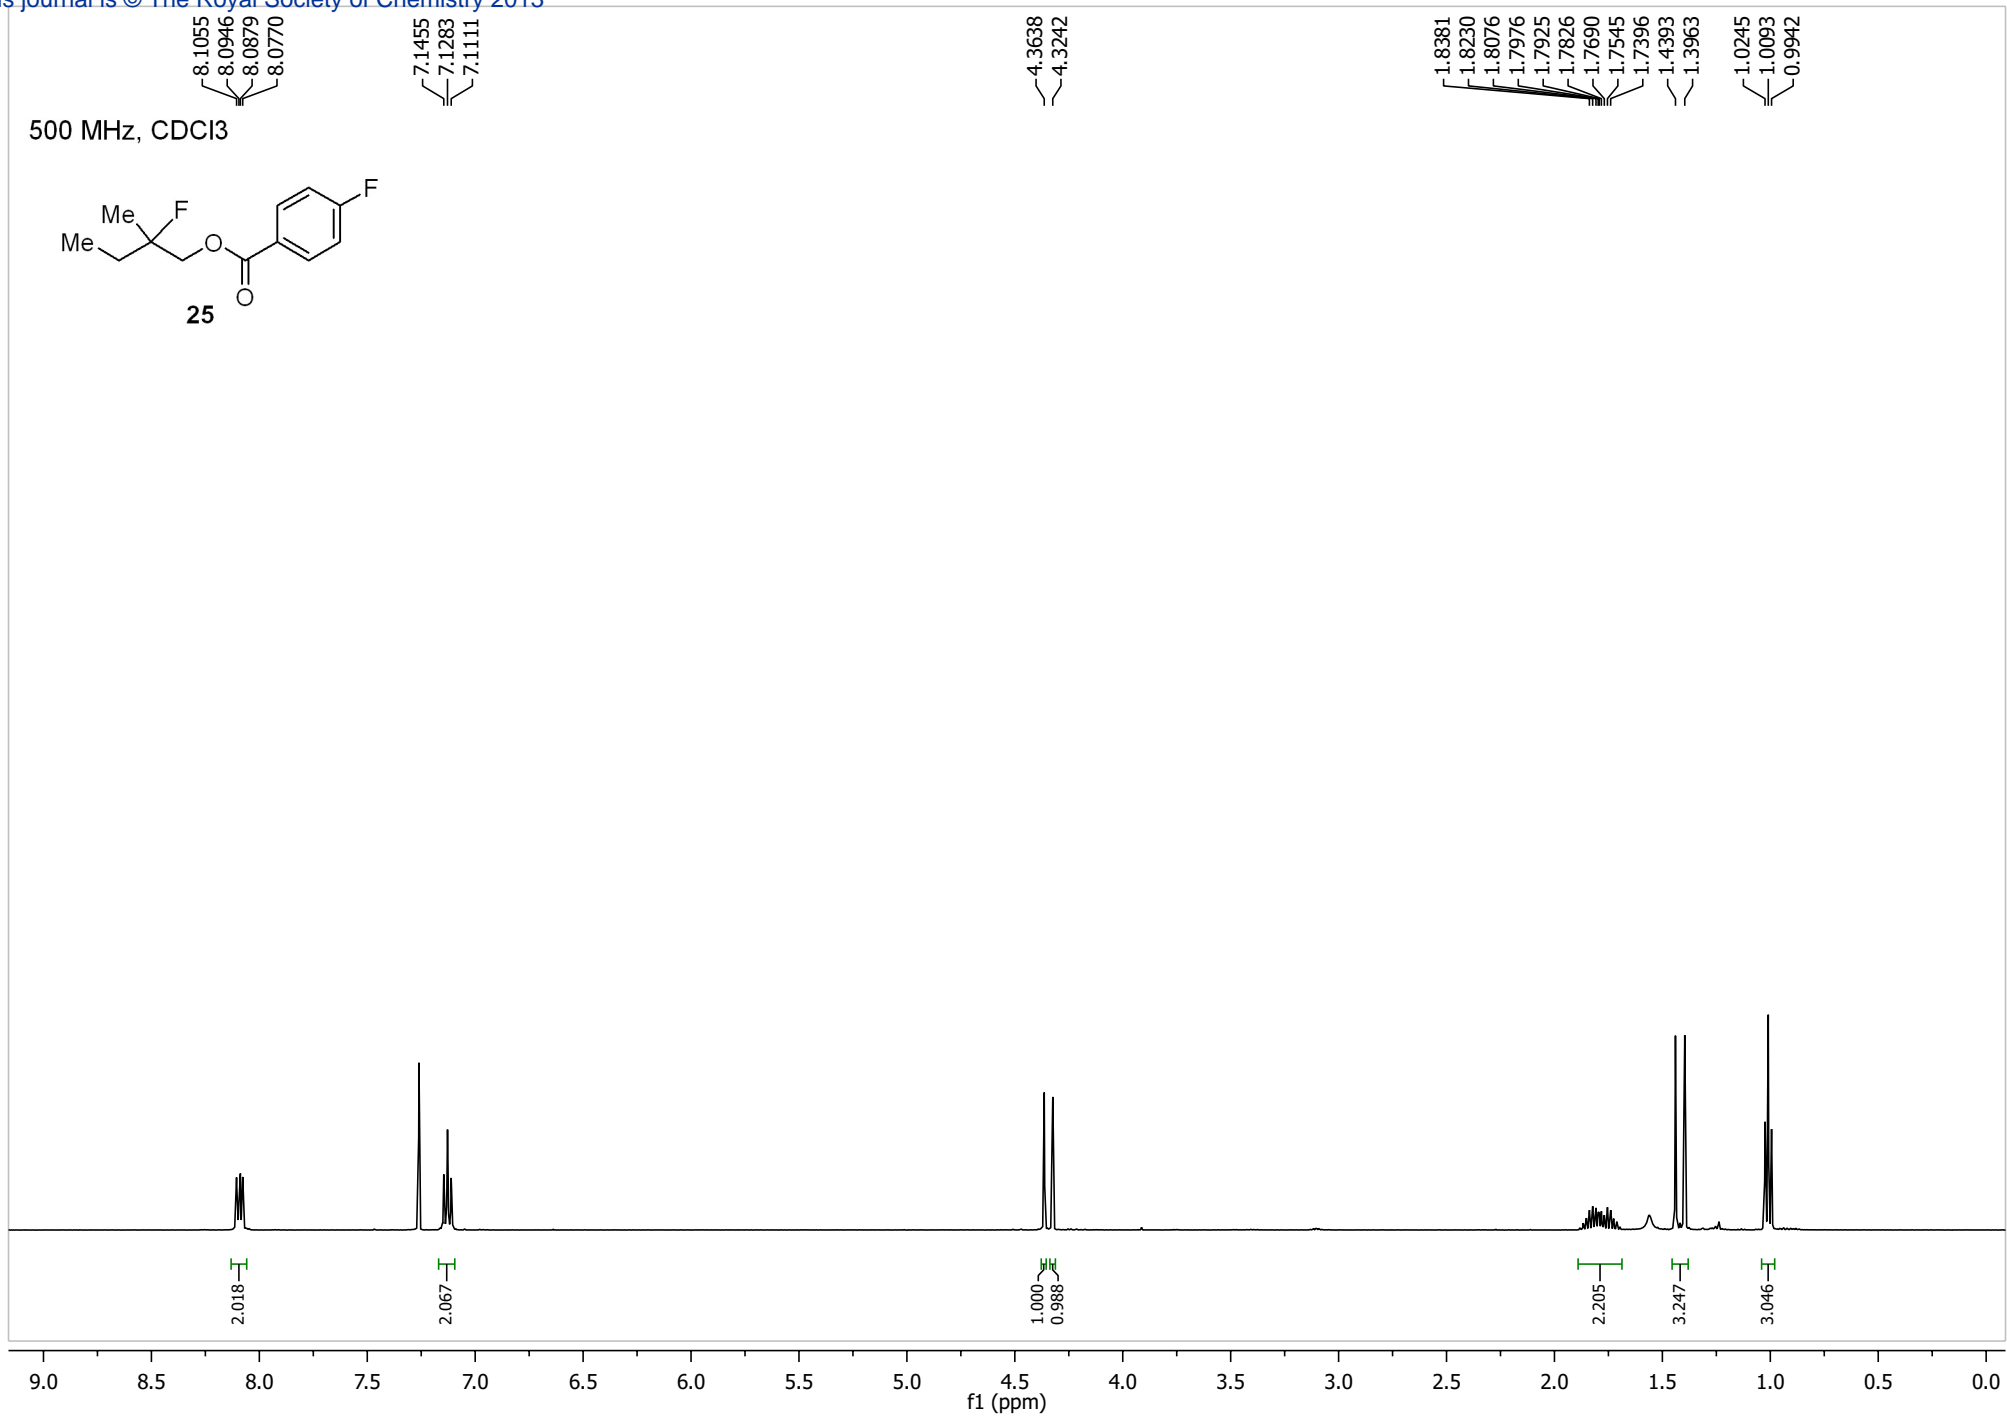

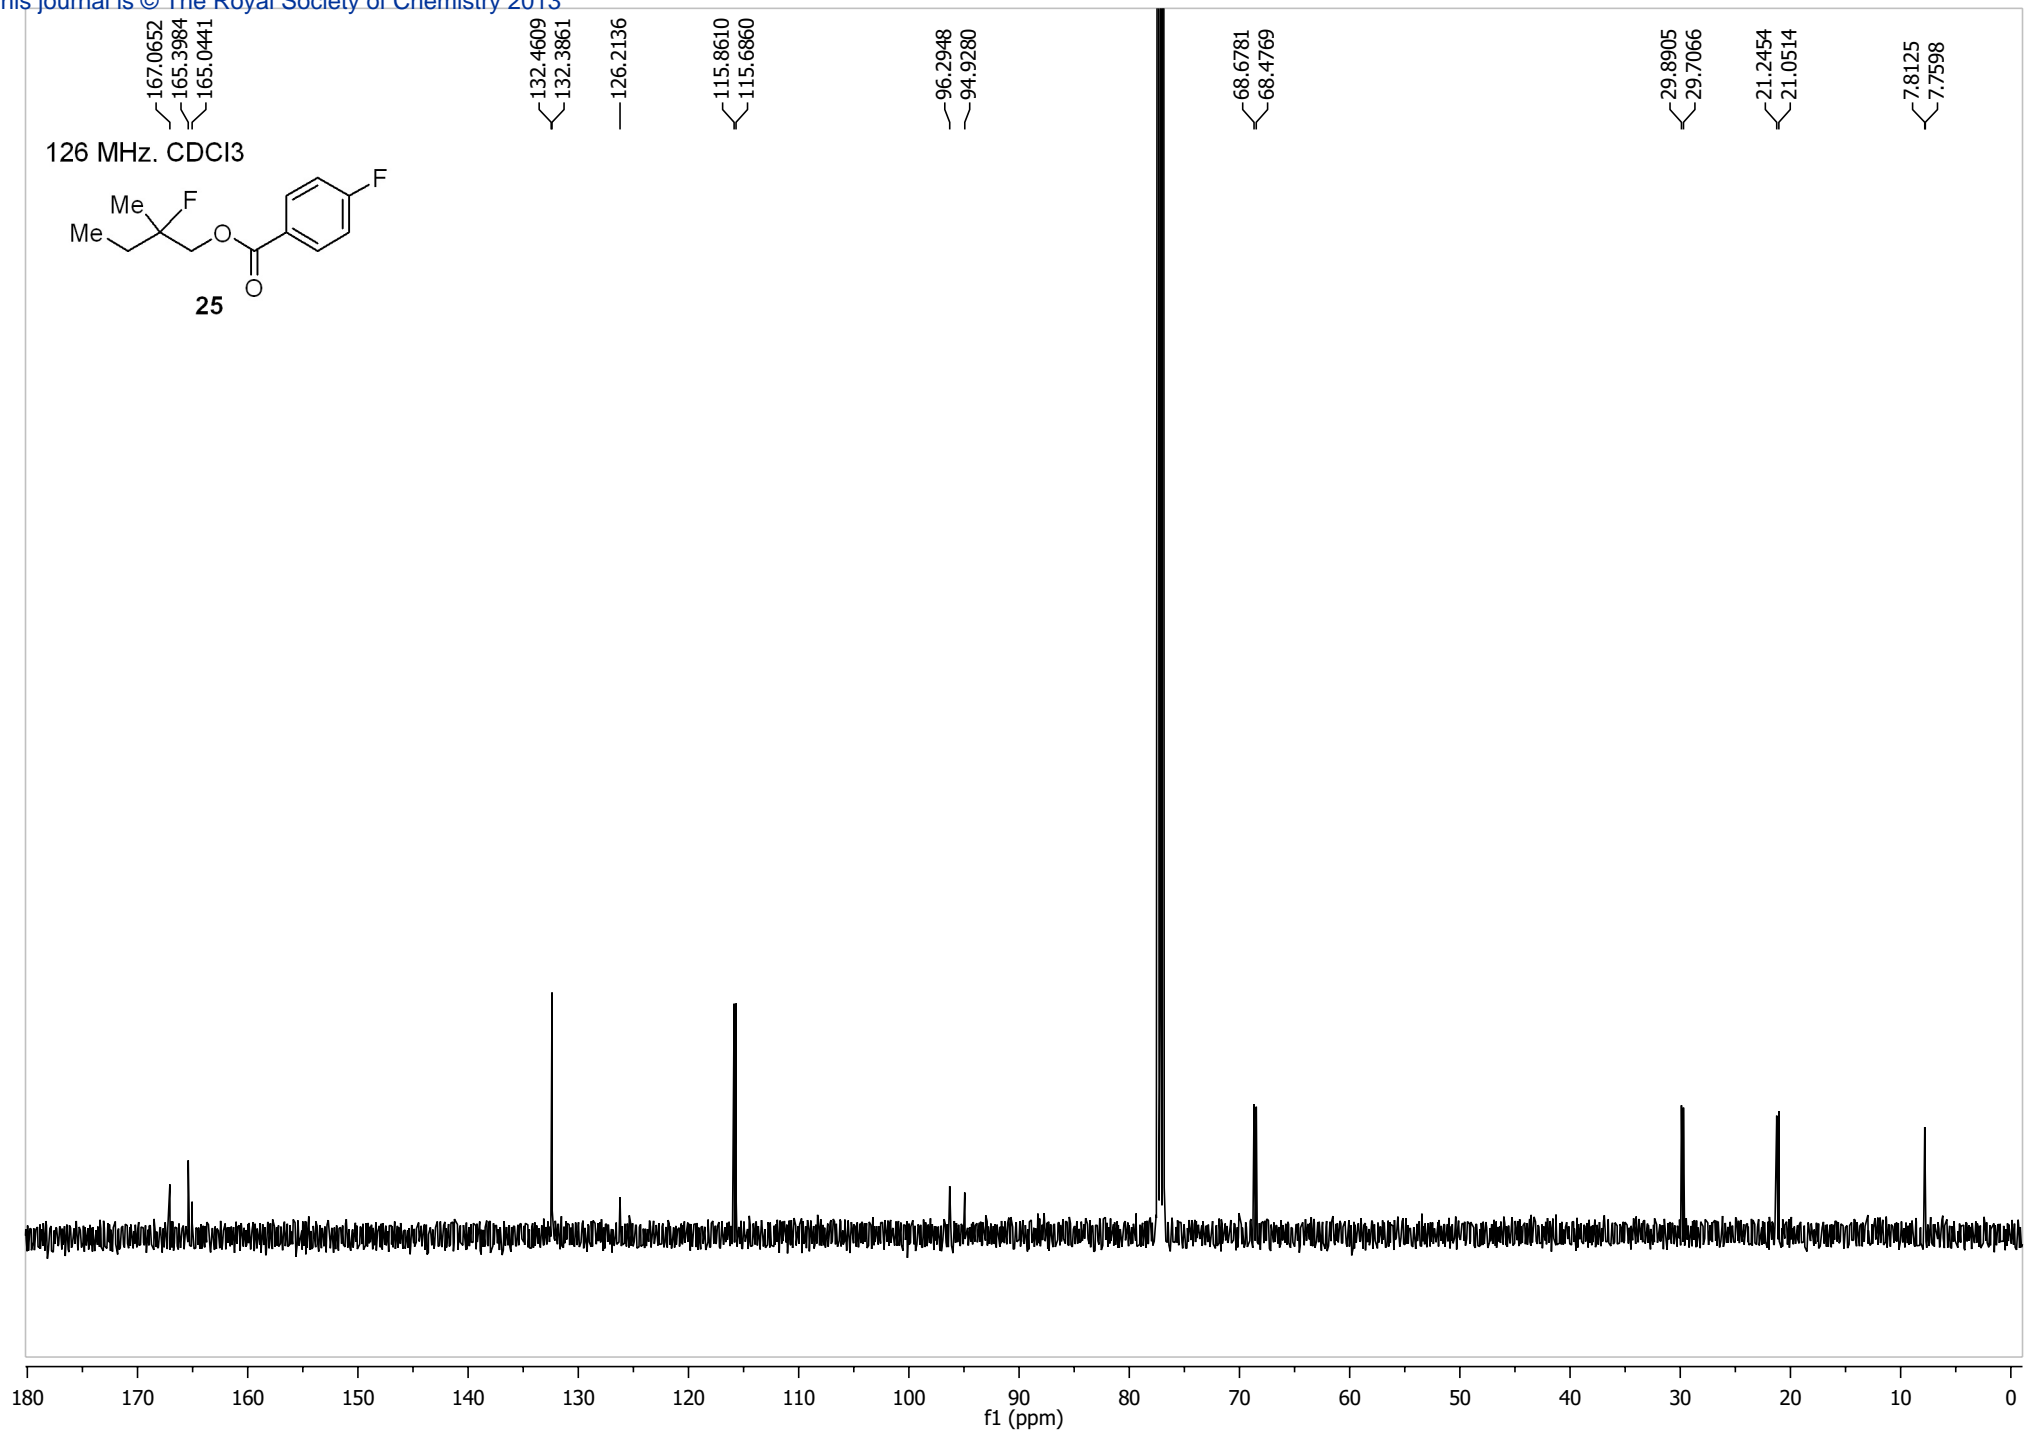

471 MHz, CDCl<sub>3</sub>

-105.2476

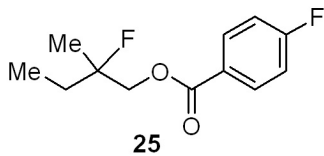

-153.6486

1.000

0.954

-95 -100 -105 -110 -115 -120 -125 -130 -135 -140 -145 -150 -155 -160 -165  
f1 (ppm)

400 MHz, CDCl<sub>3</sub>

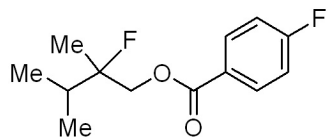

26

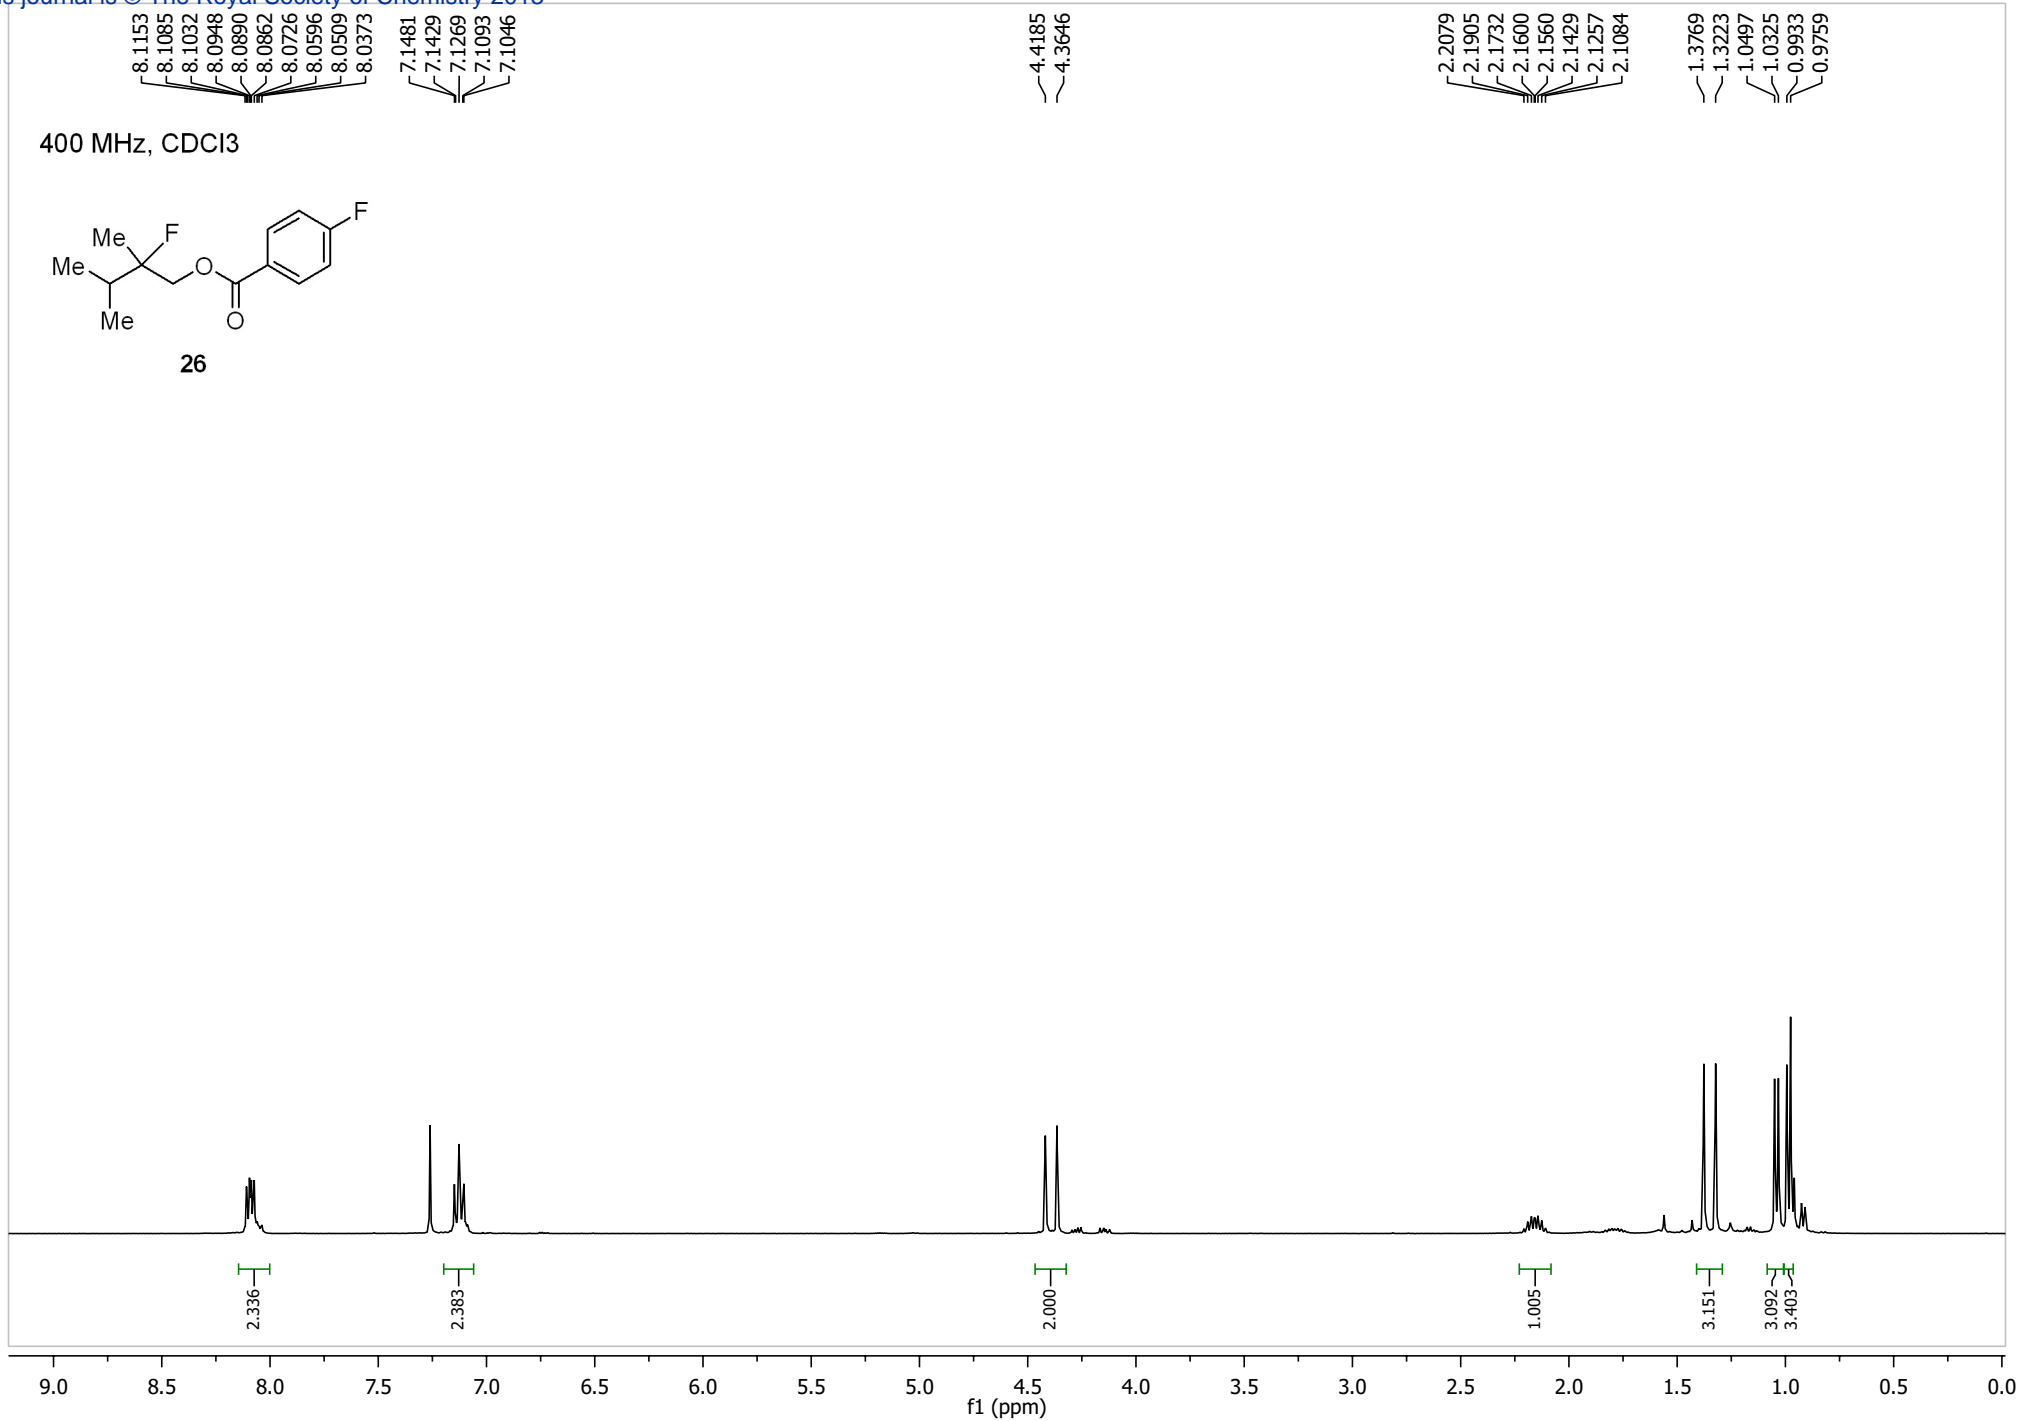

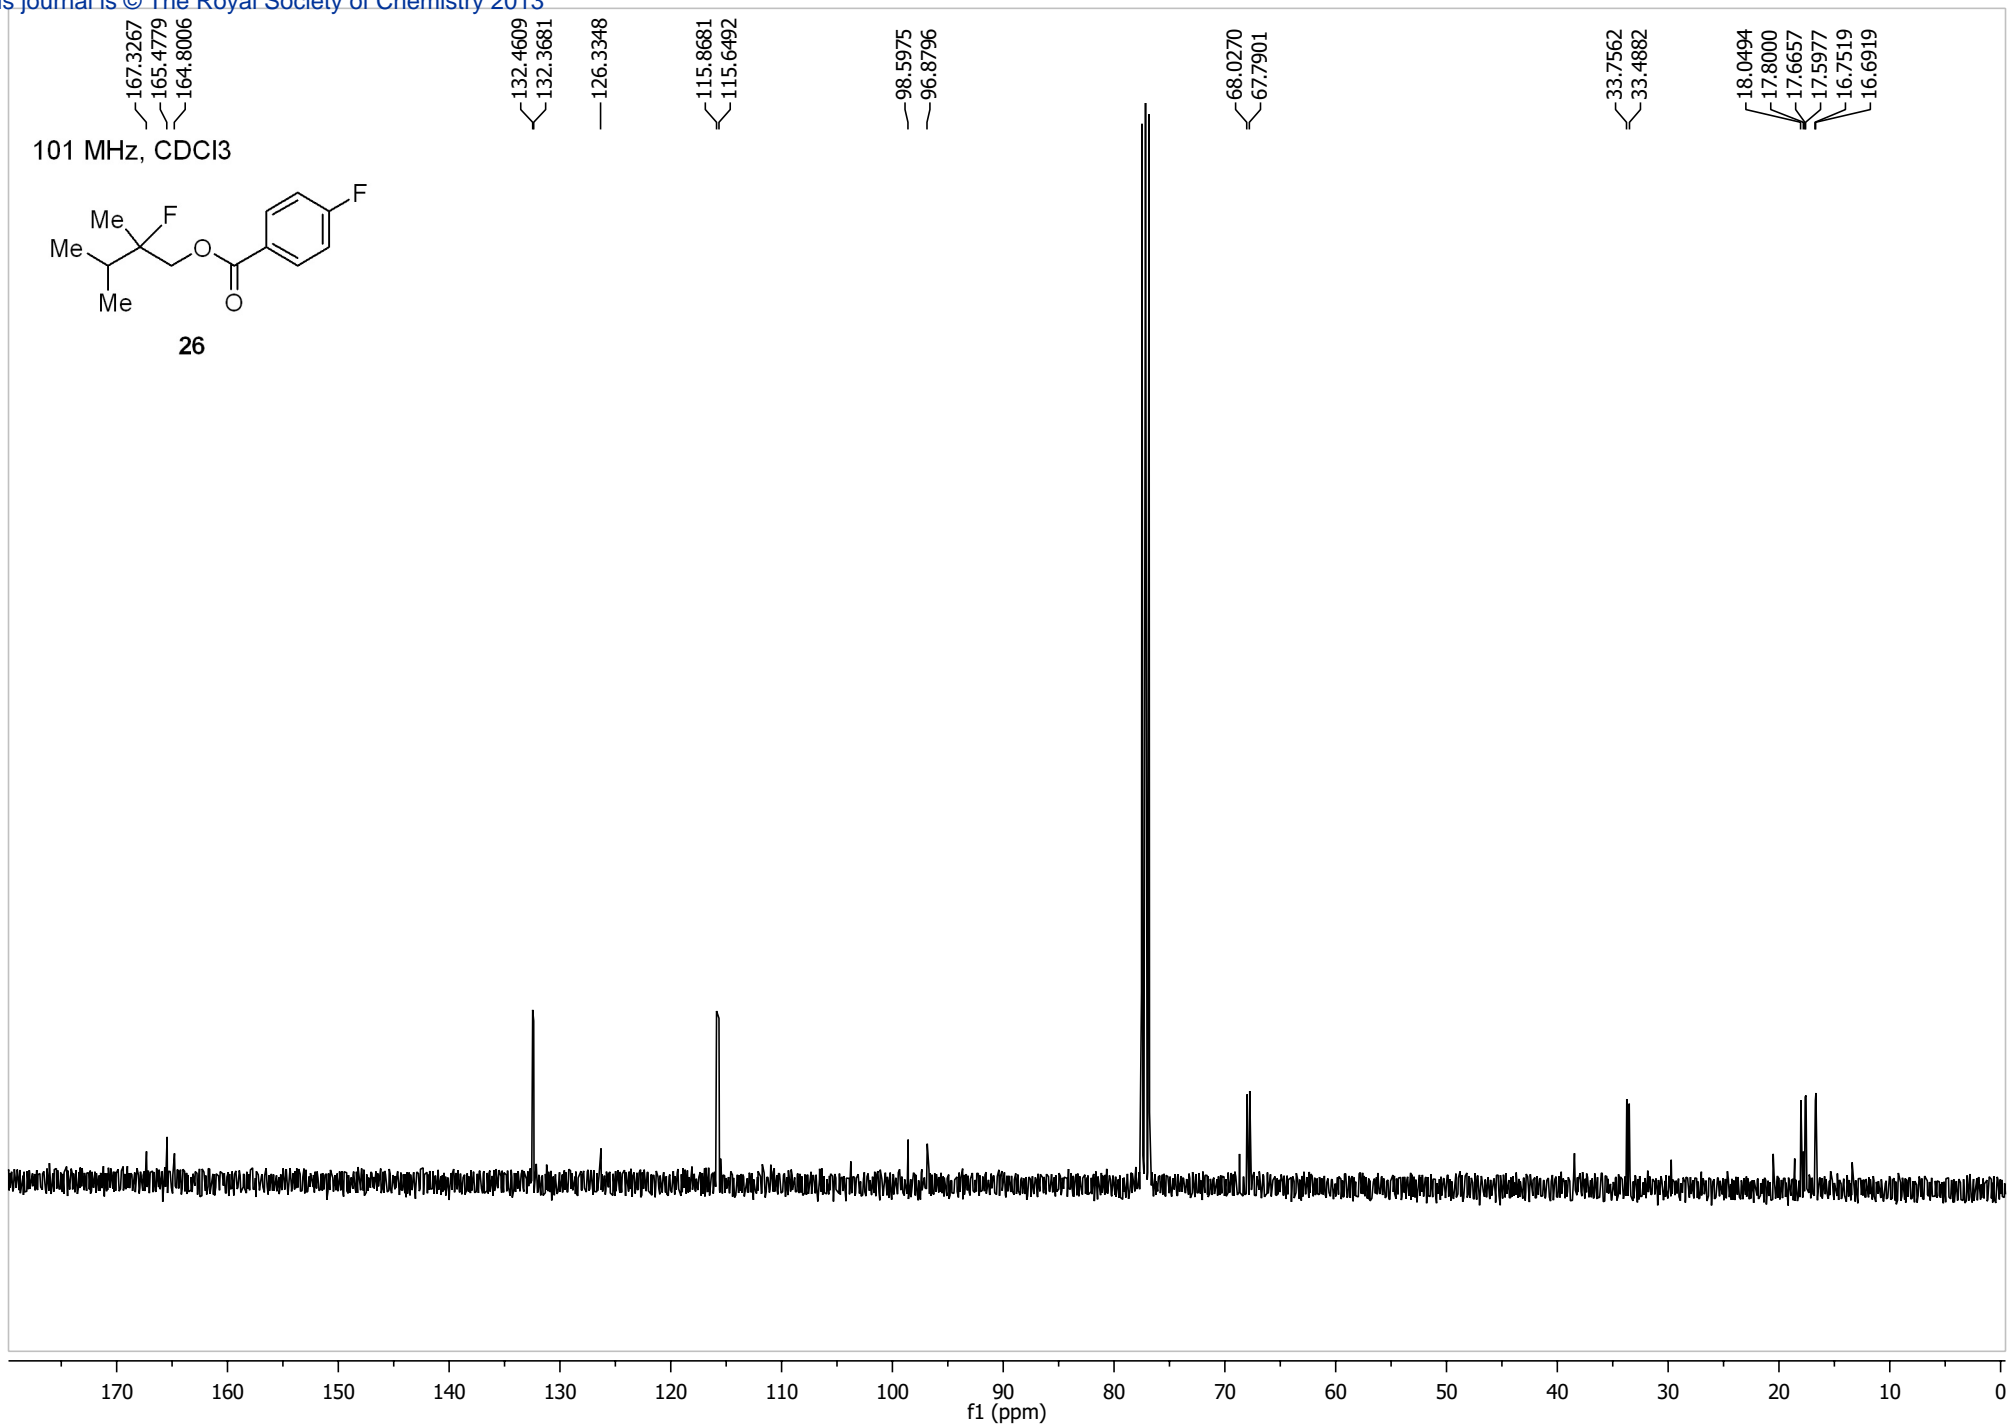



376 MHz, CDCl<sub>3</sub>

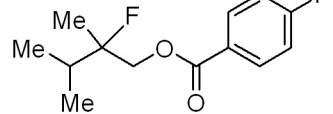

26

---105.3283

---154.5283

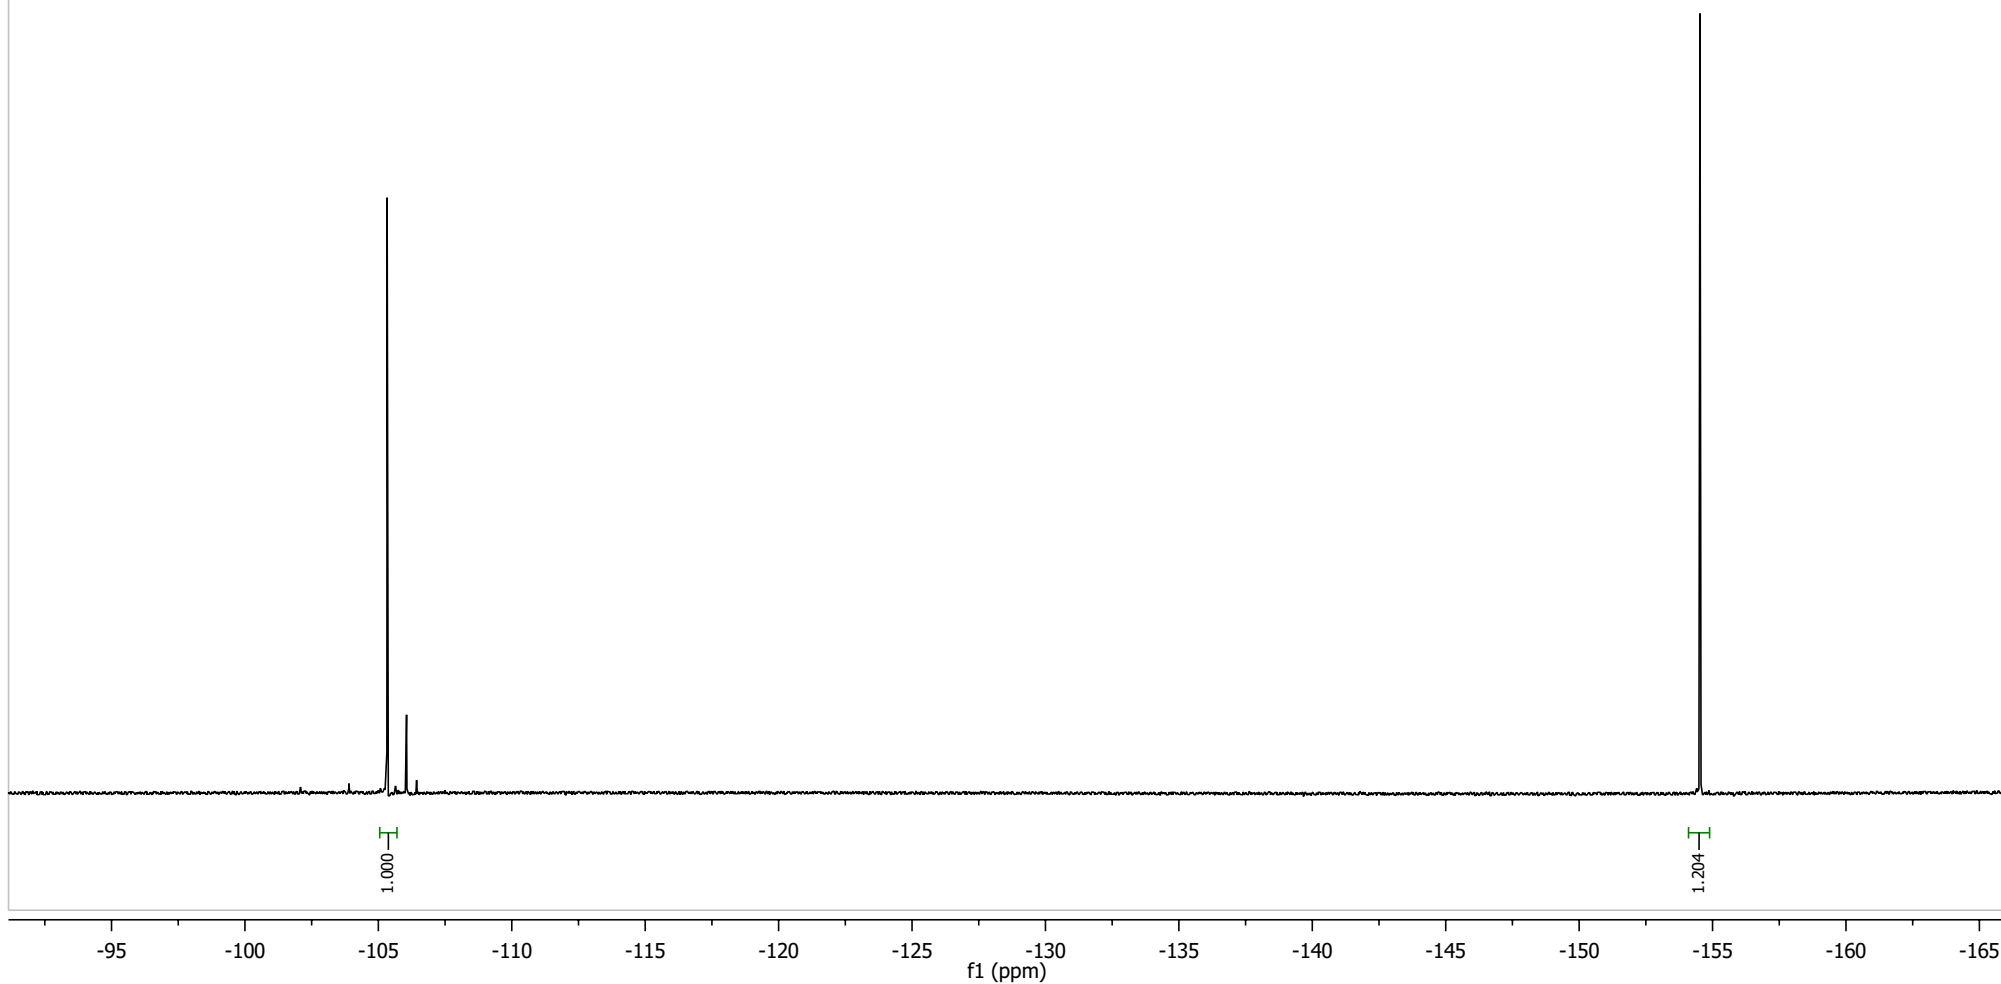

400 MHz, CDCl<sub>3</sub>

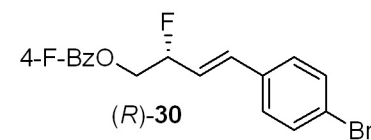

8.1088  
8.0953  
8.0866  
8.0731  
7.4799  
7.4587  
7.2813  
7.2602  
7.2551  
7.1458  
7.1240  
6.7727  
6.7328  
6.7258  
6.2951  
6.2791  
6.2608  
6.2448  
6.2390  
5.4616  
5.4535  
5.4465  
5.3428  
5.3397  
5.3319  
5.3255  
4.6289  
4.6196  
4.5959  
4.5886  
4.5604  
4.5530  
4.5294  
4.5210  
4.5027  
4.4894  
4.4711  
4.4532  
4.4399  
4.4222

1.914  
1.952  
2.471  
1.947  
0.959  
0.979  
1.000  
2.008

9.0 8.5 8.0 7.5 7.0 6.5 6.0 5.5 5.0 4.5 4.0 3.5 3.0 2.5 2.0 1.5 1.0 0.5

f1 (ppm)

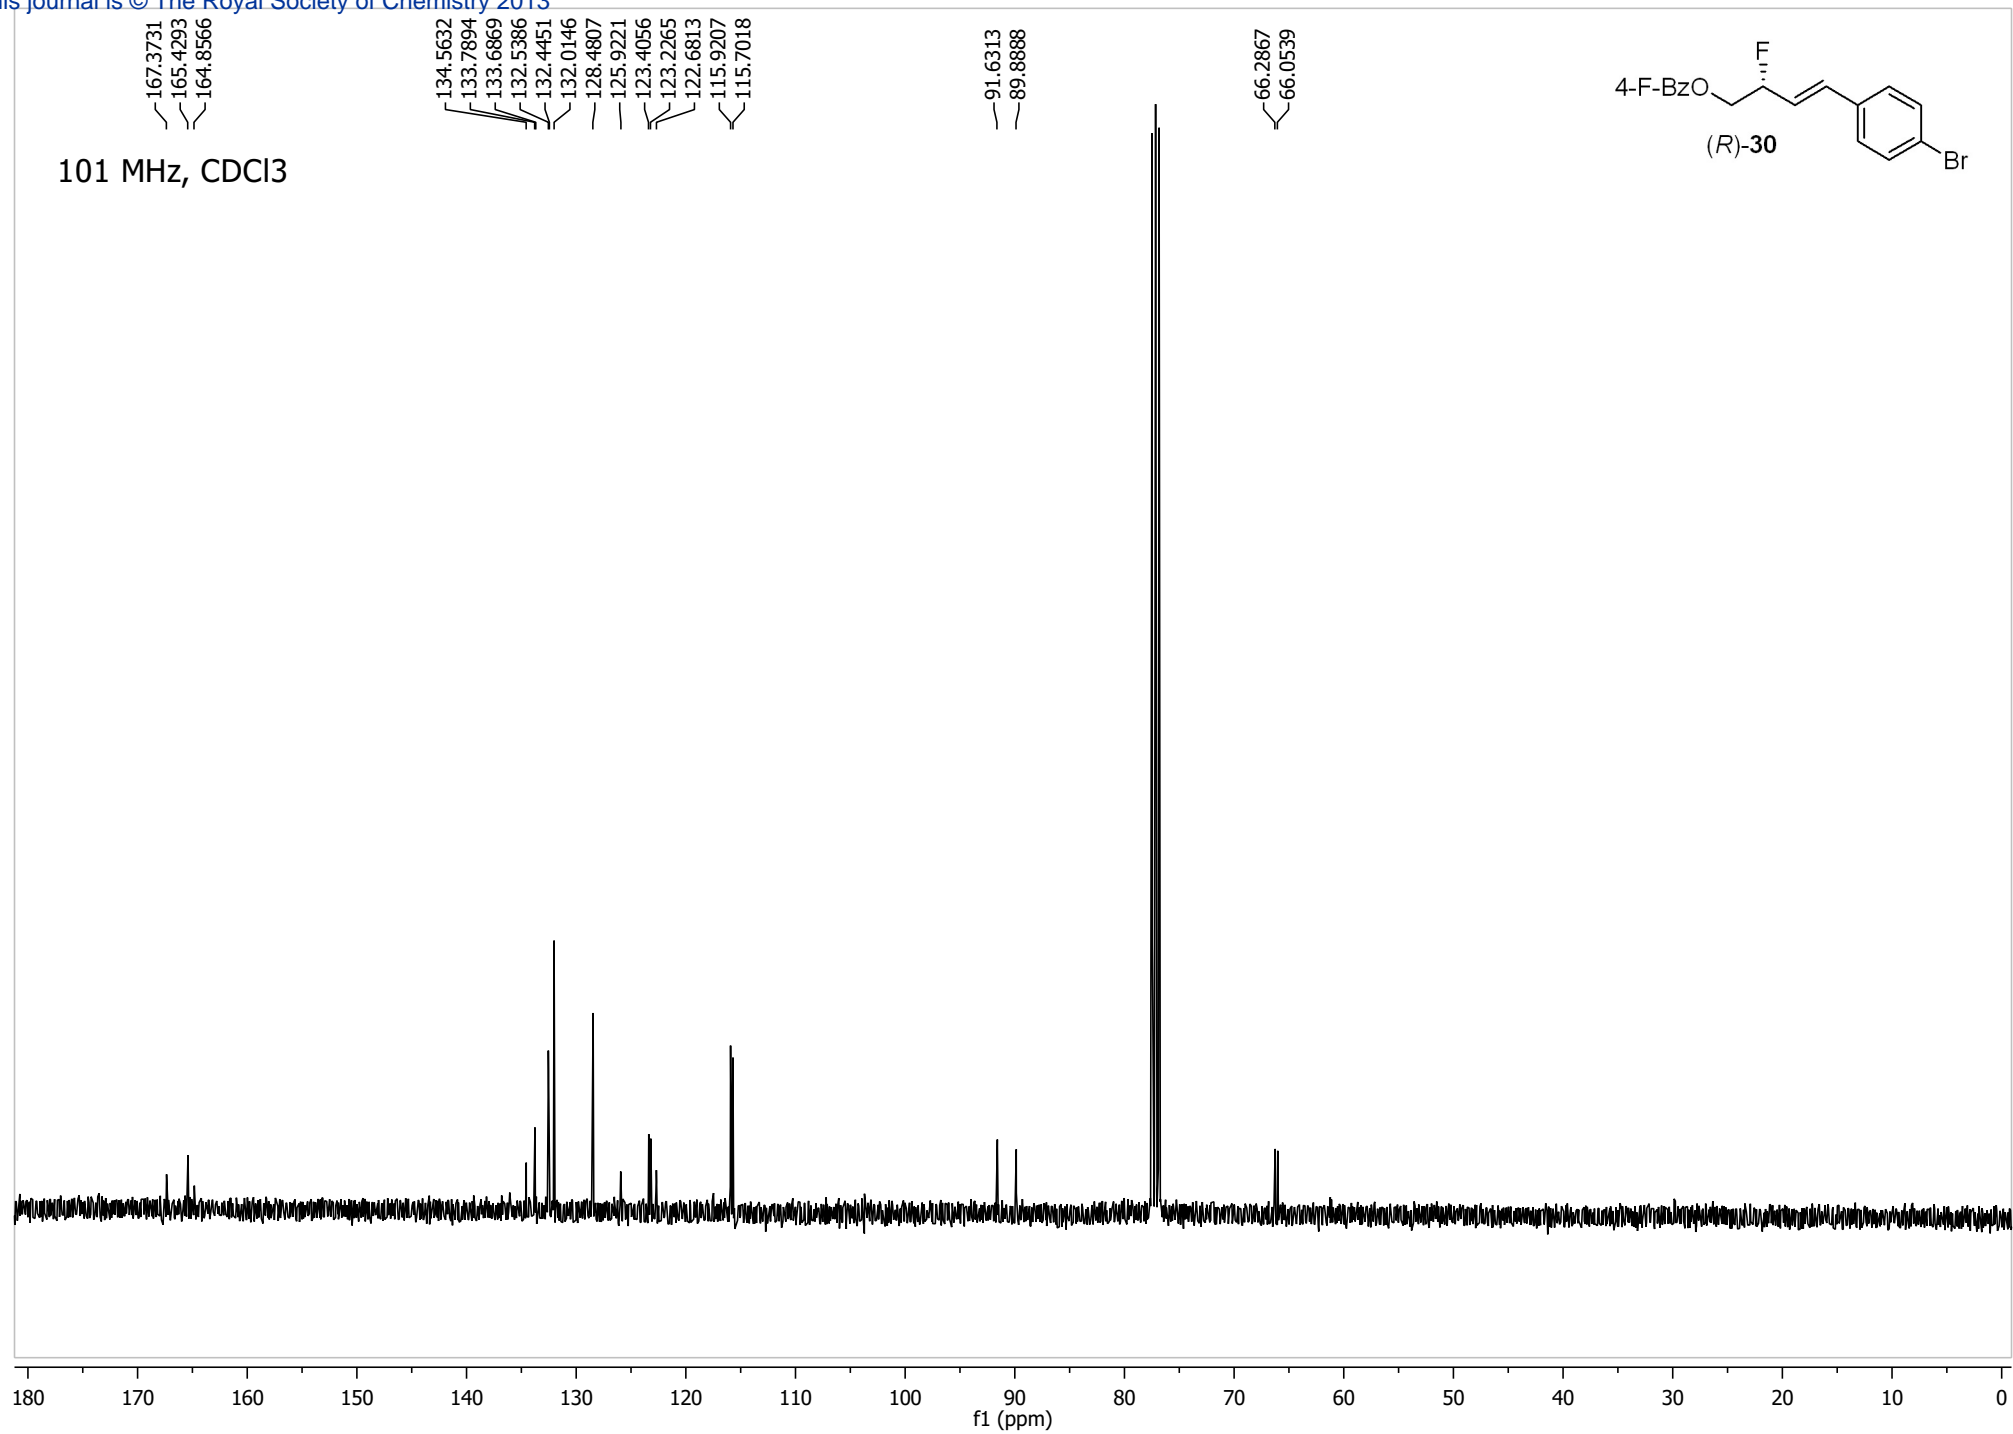

CDCl<sub>3</sub>, 282 MHz

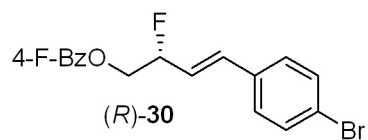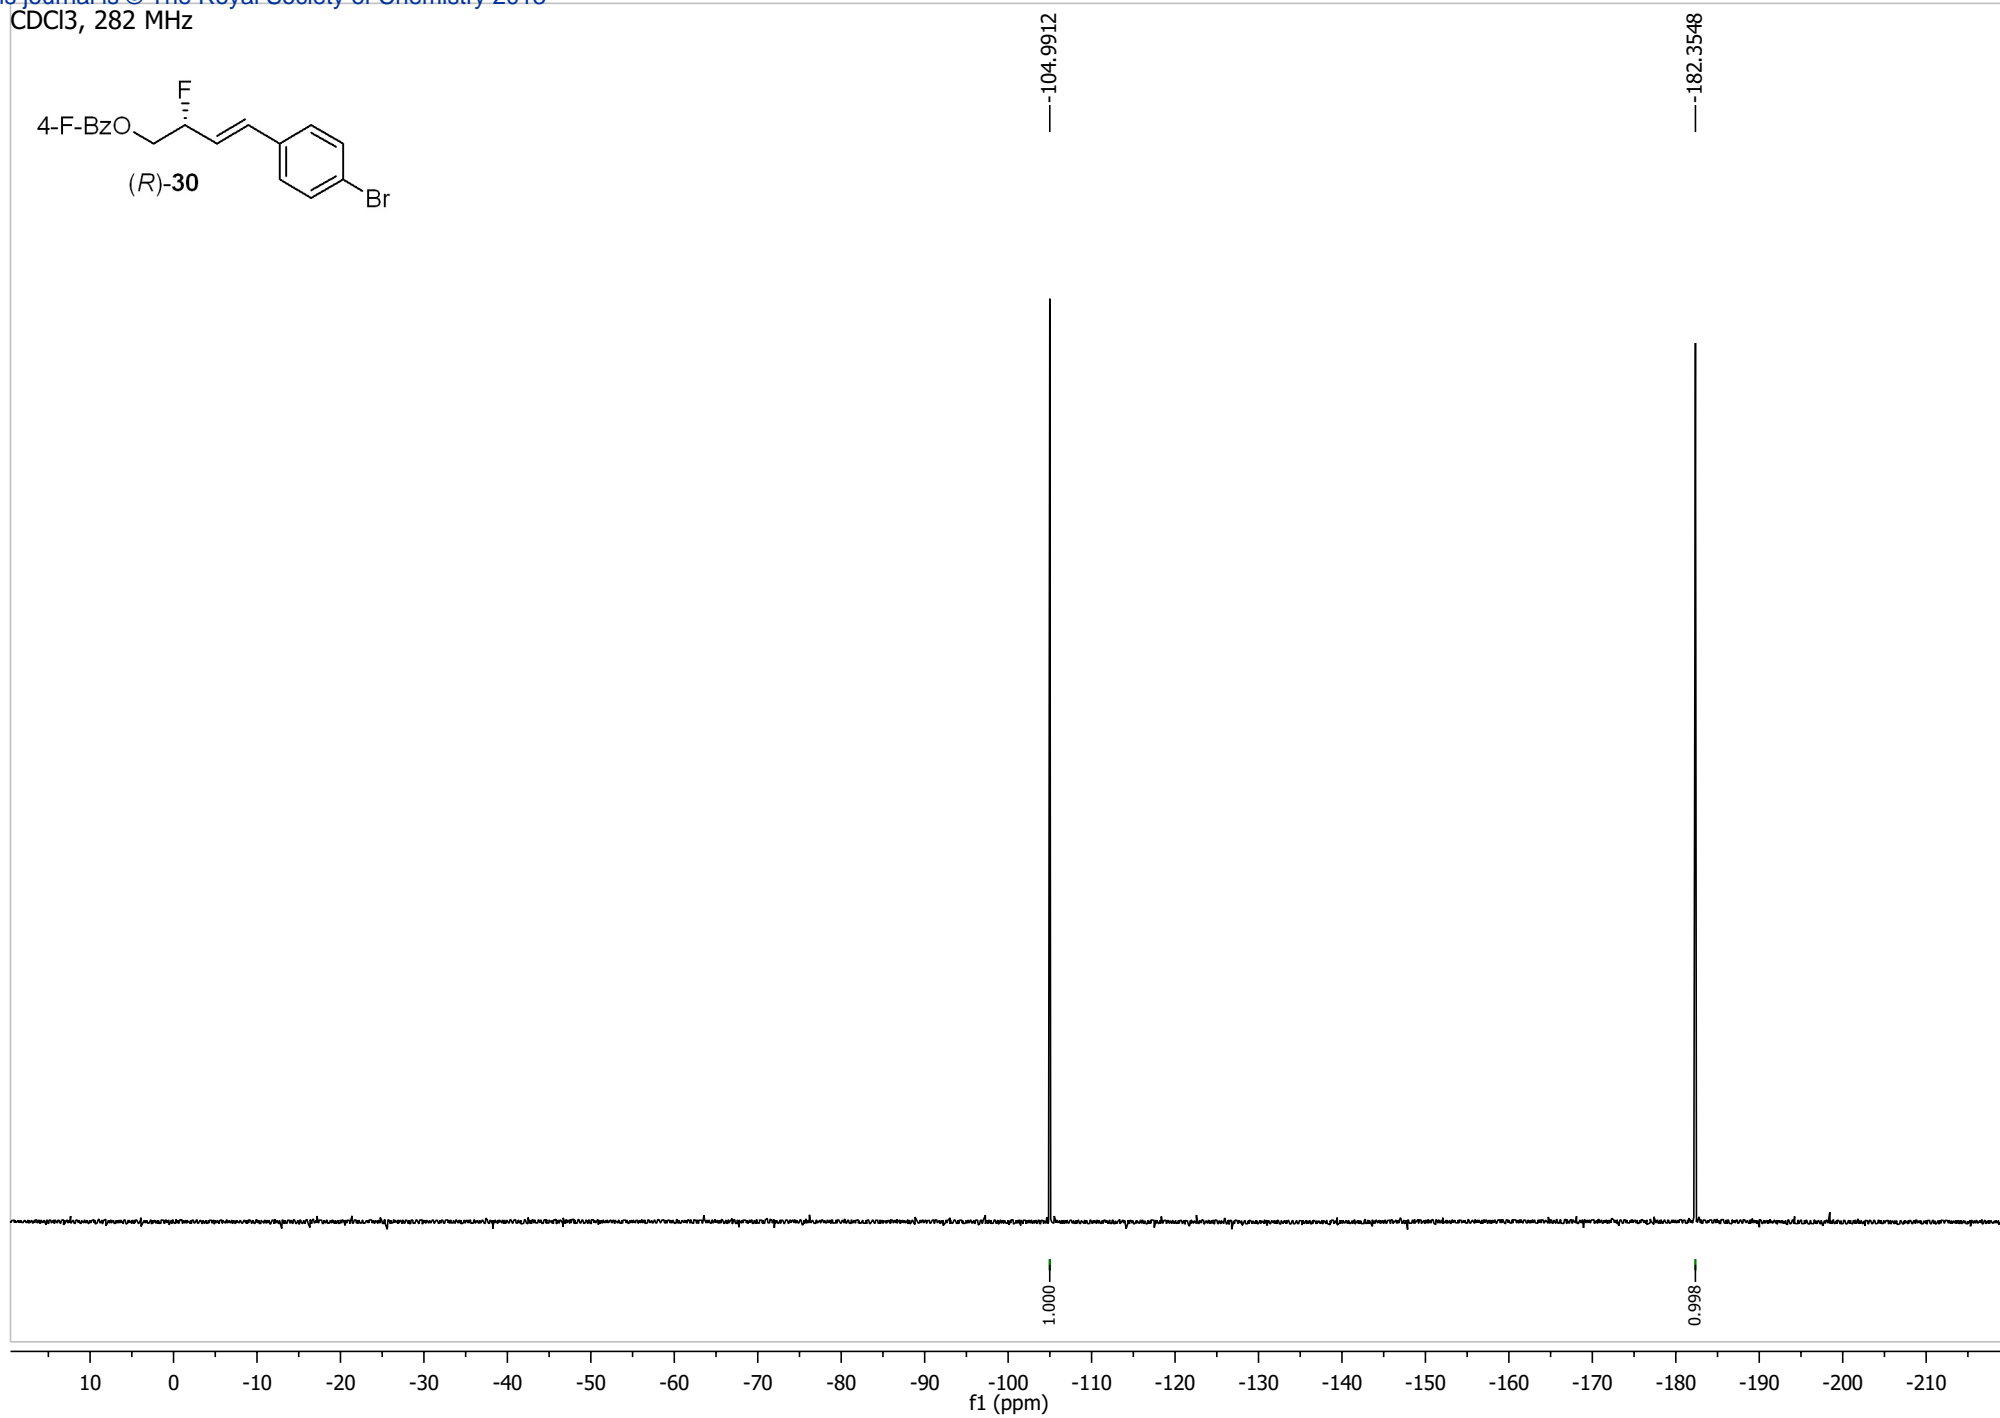

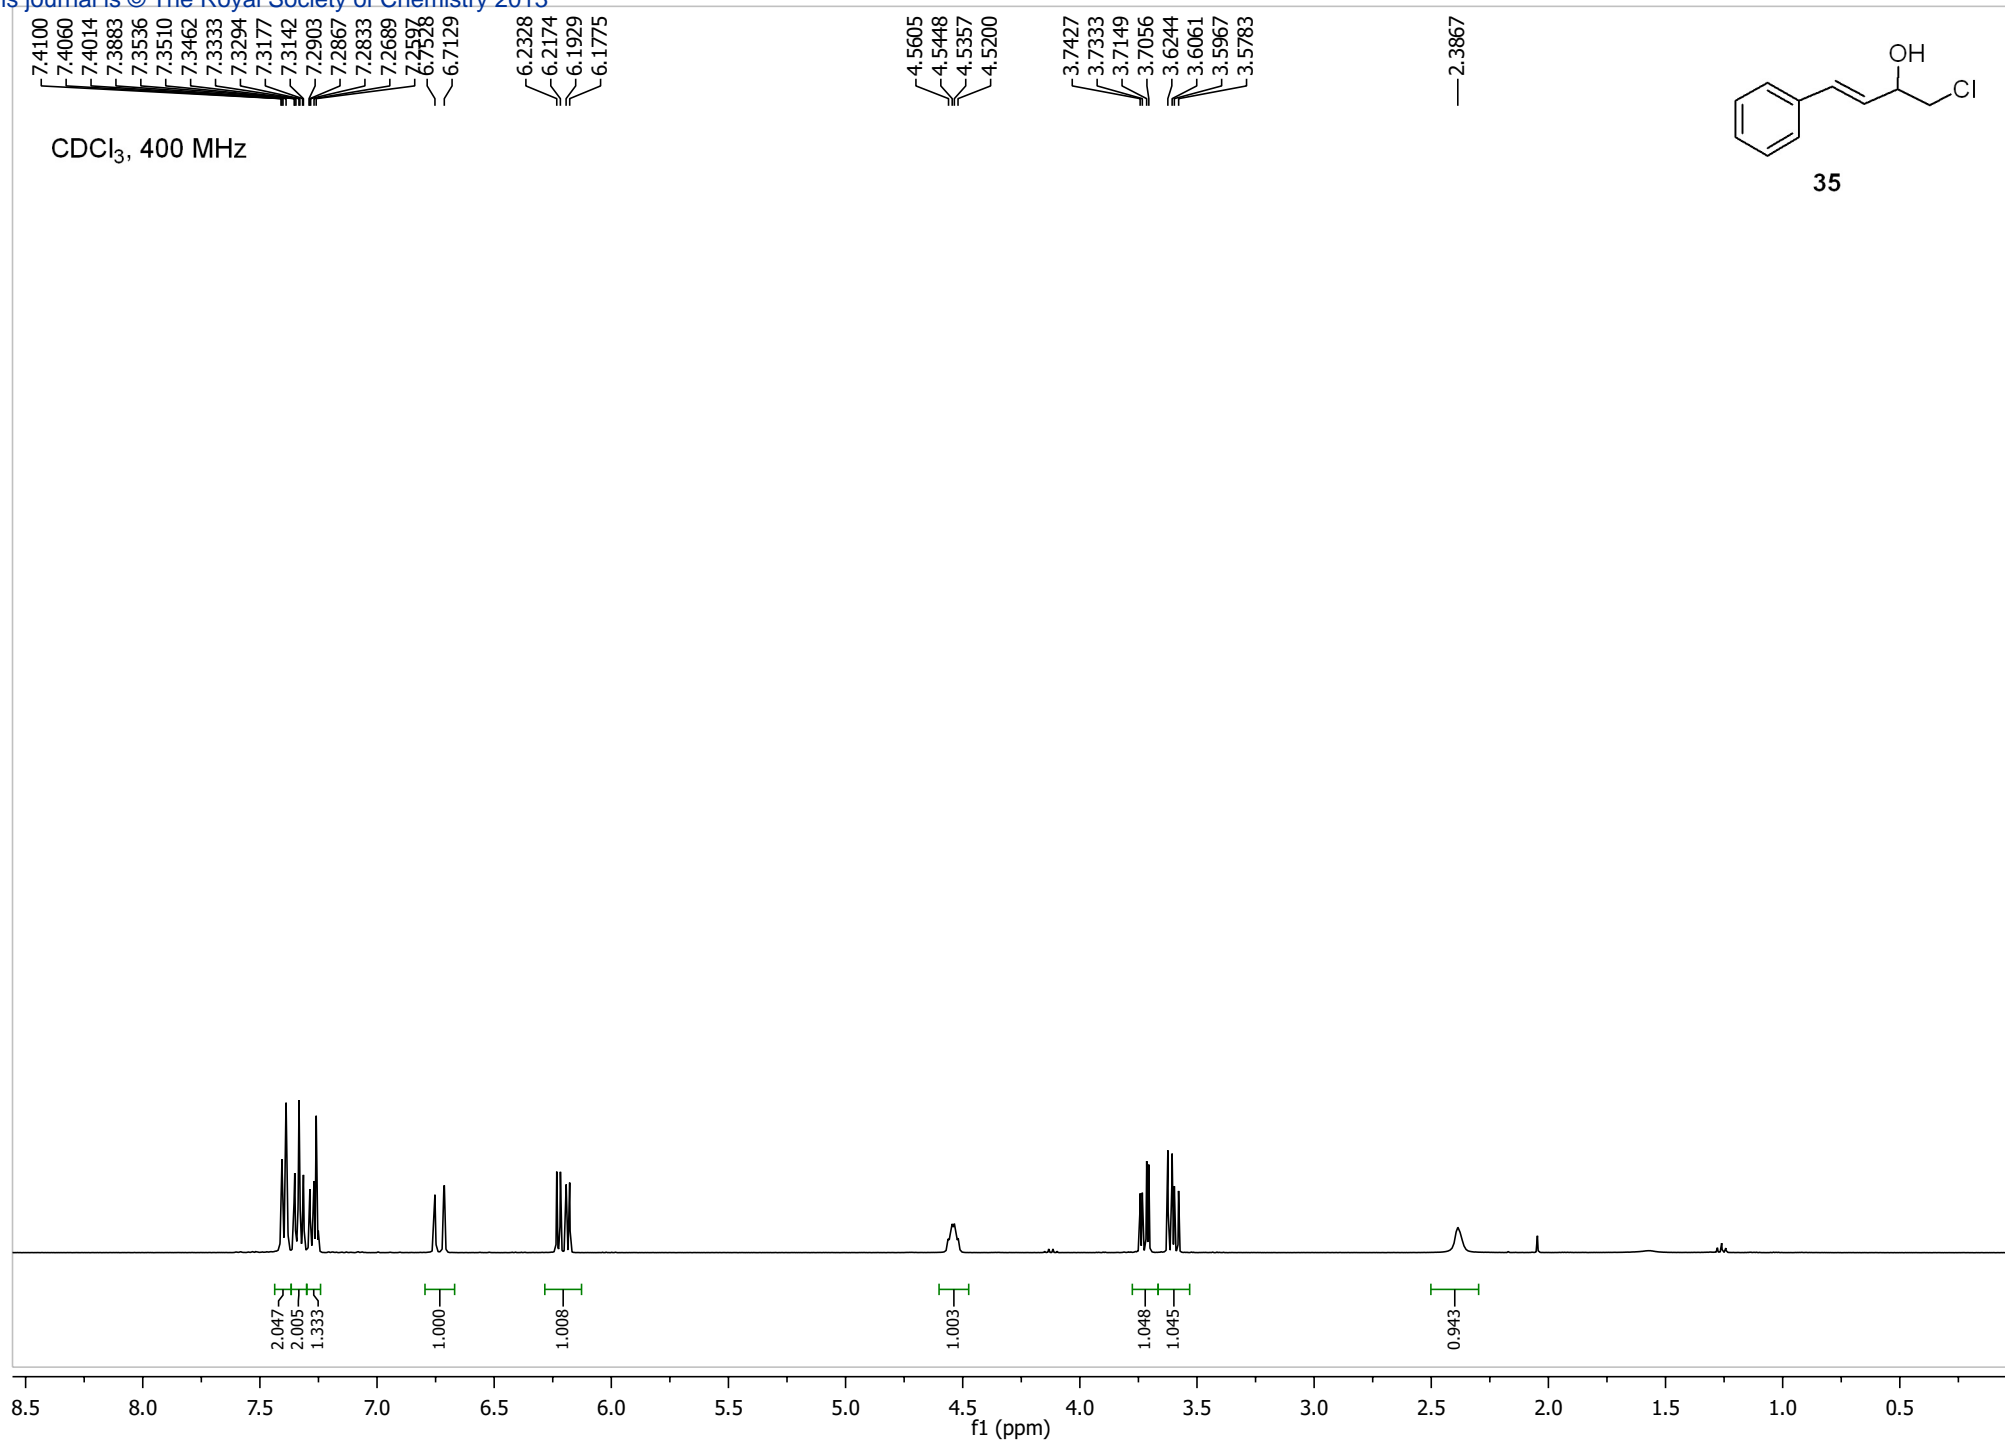

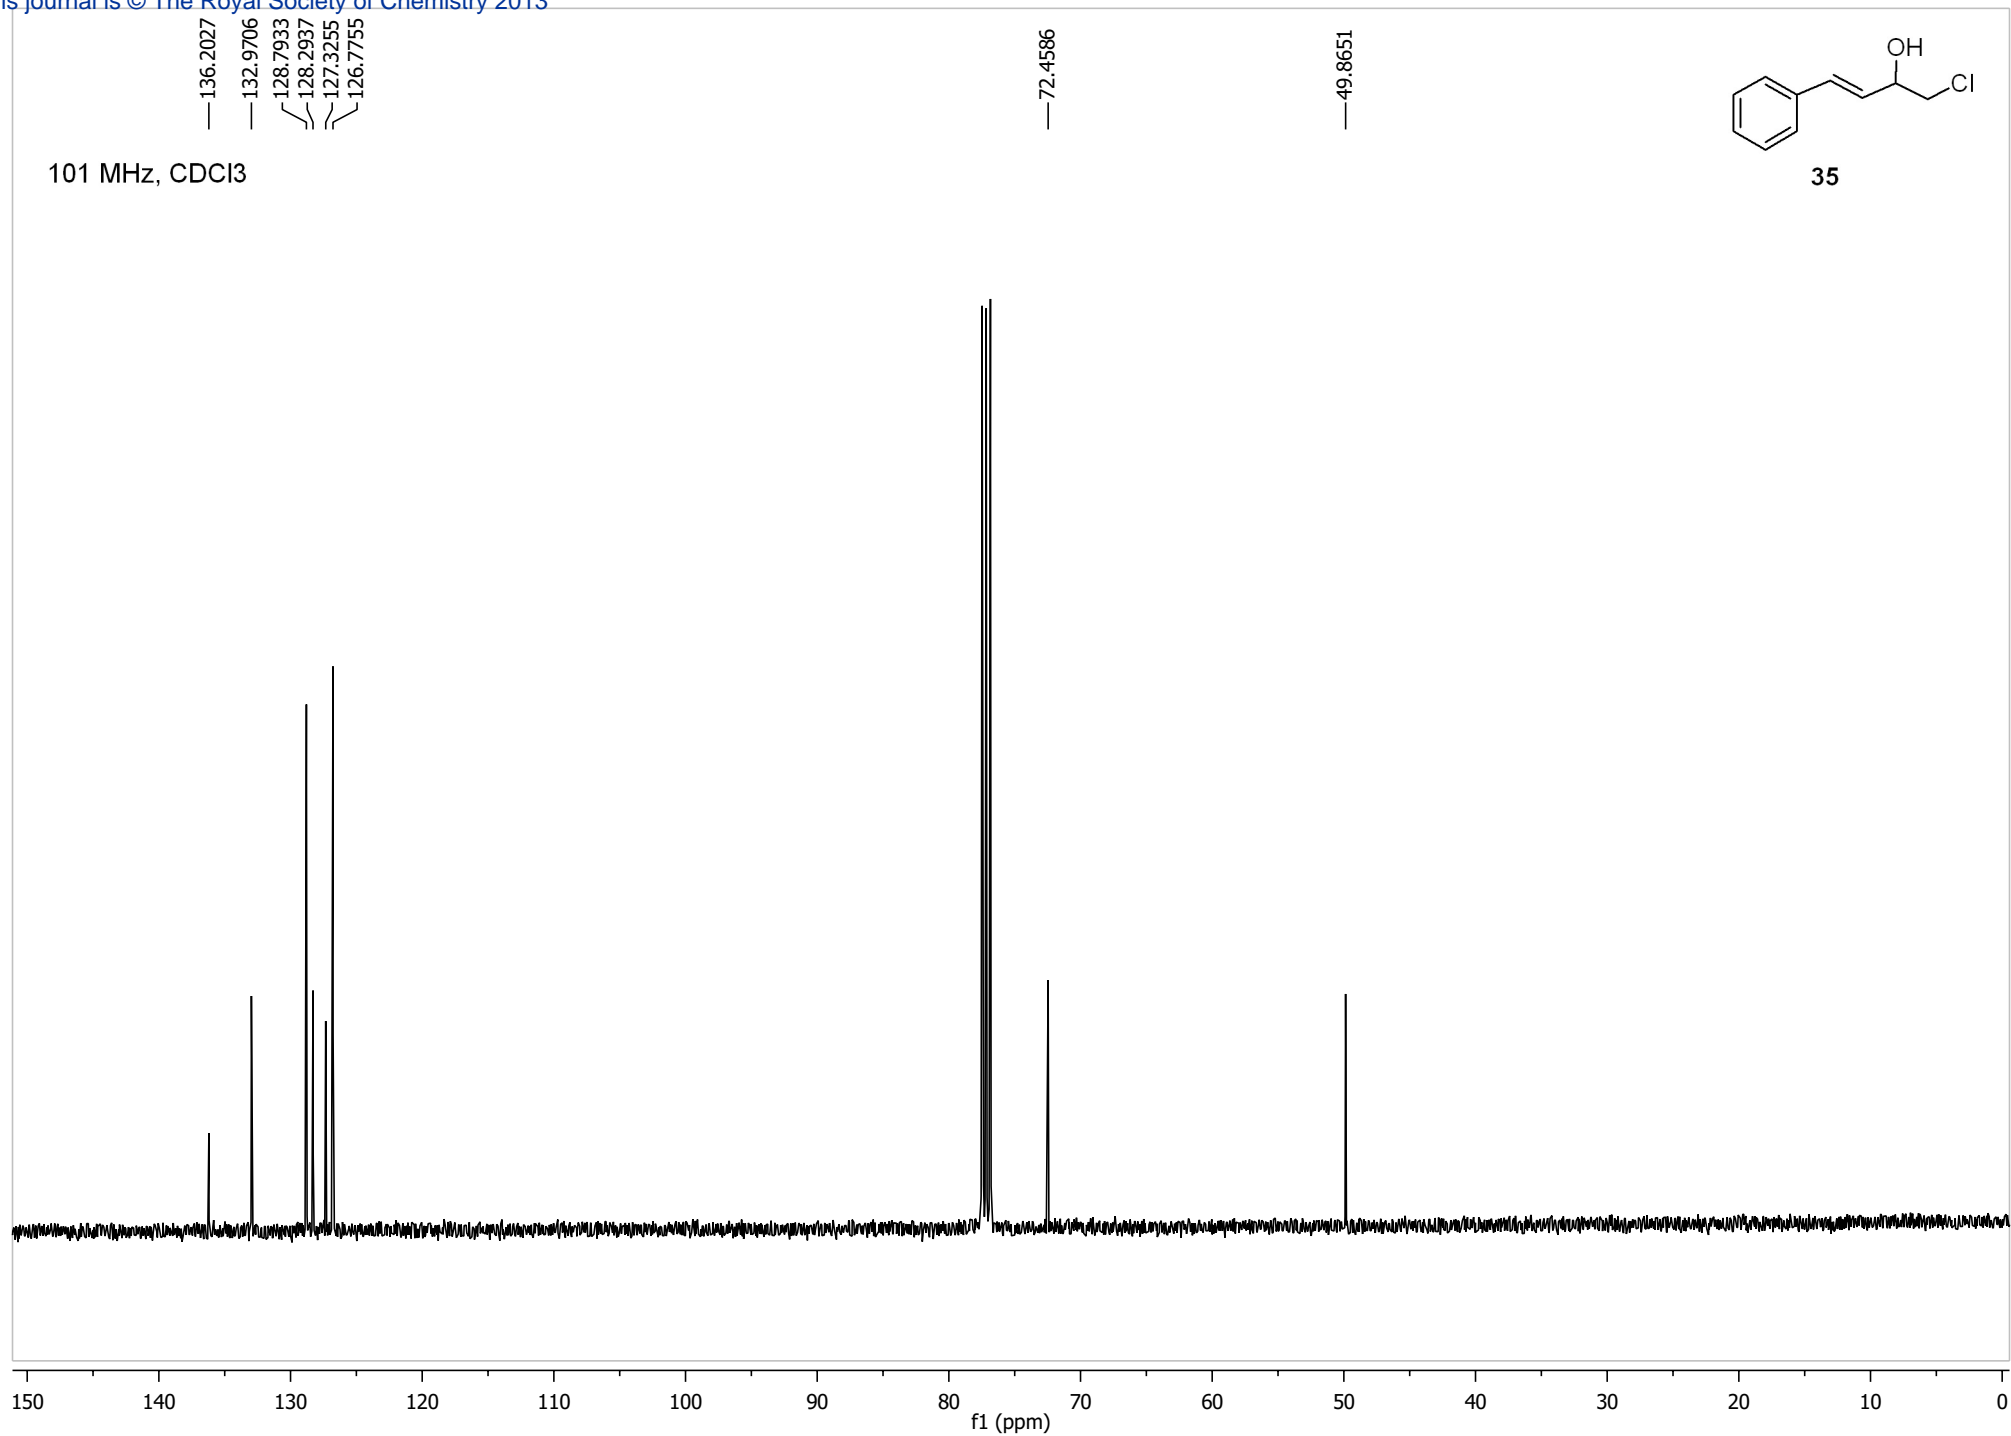

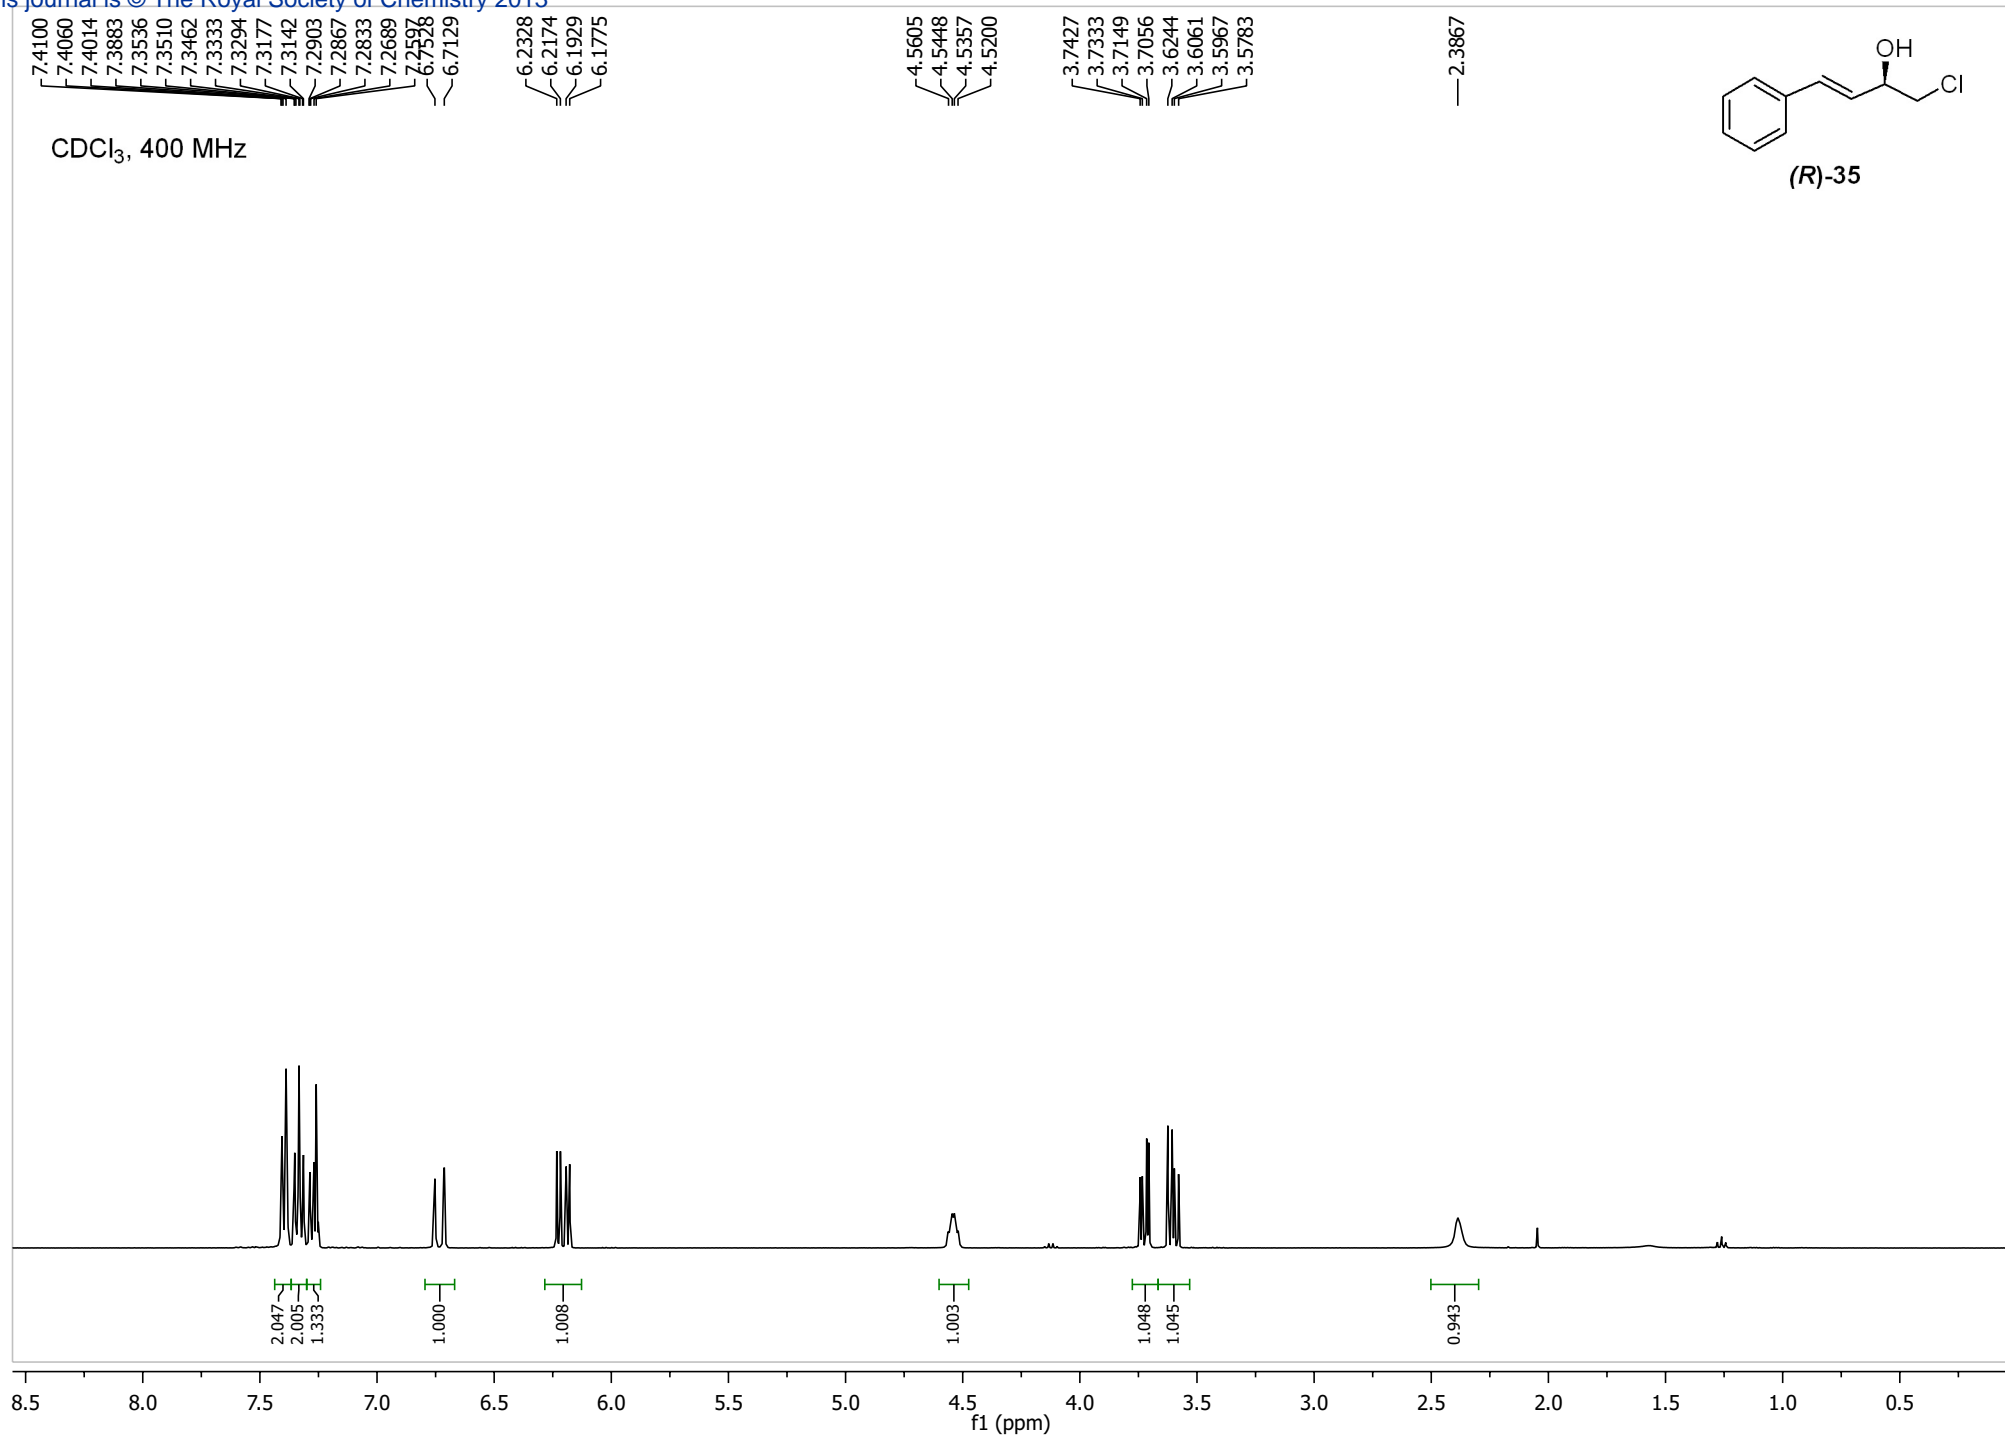

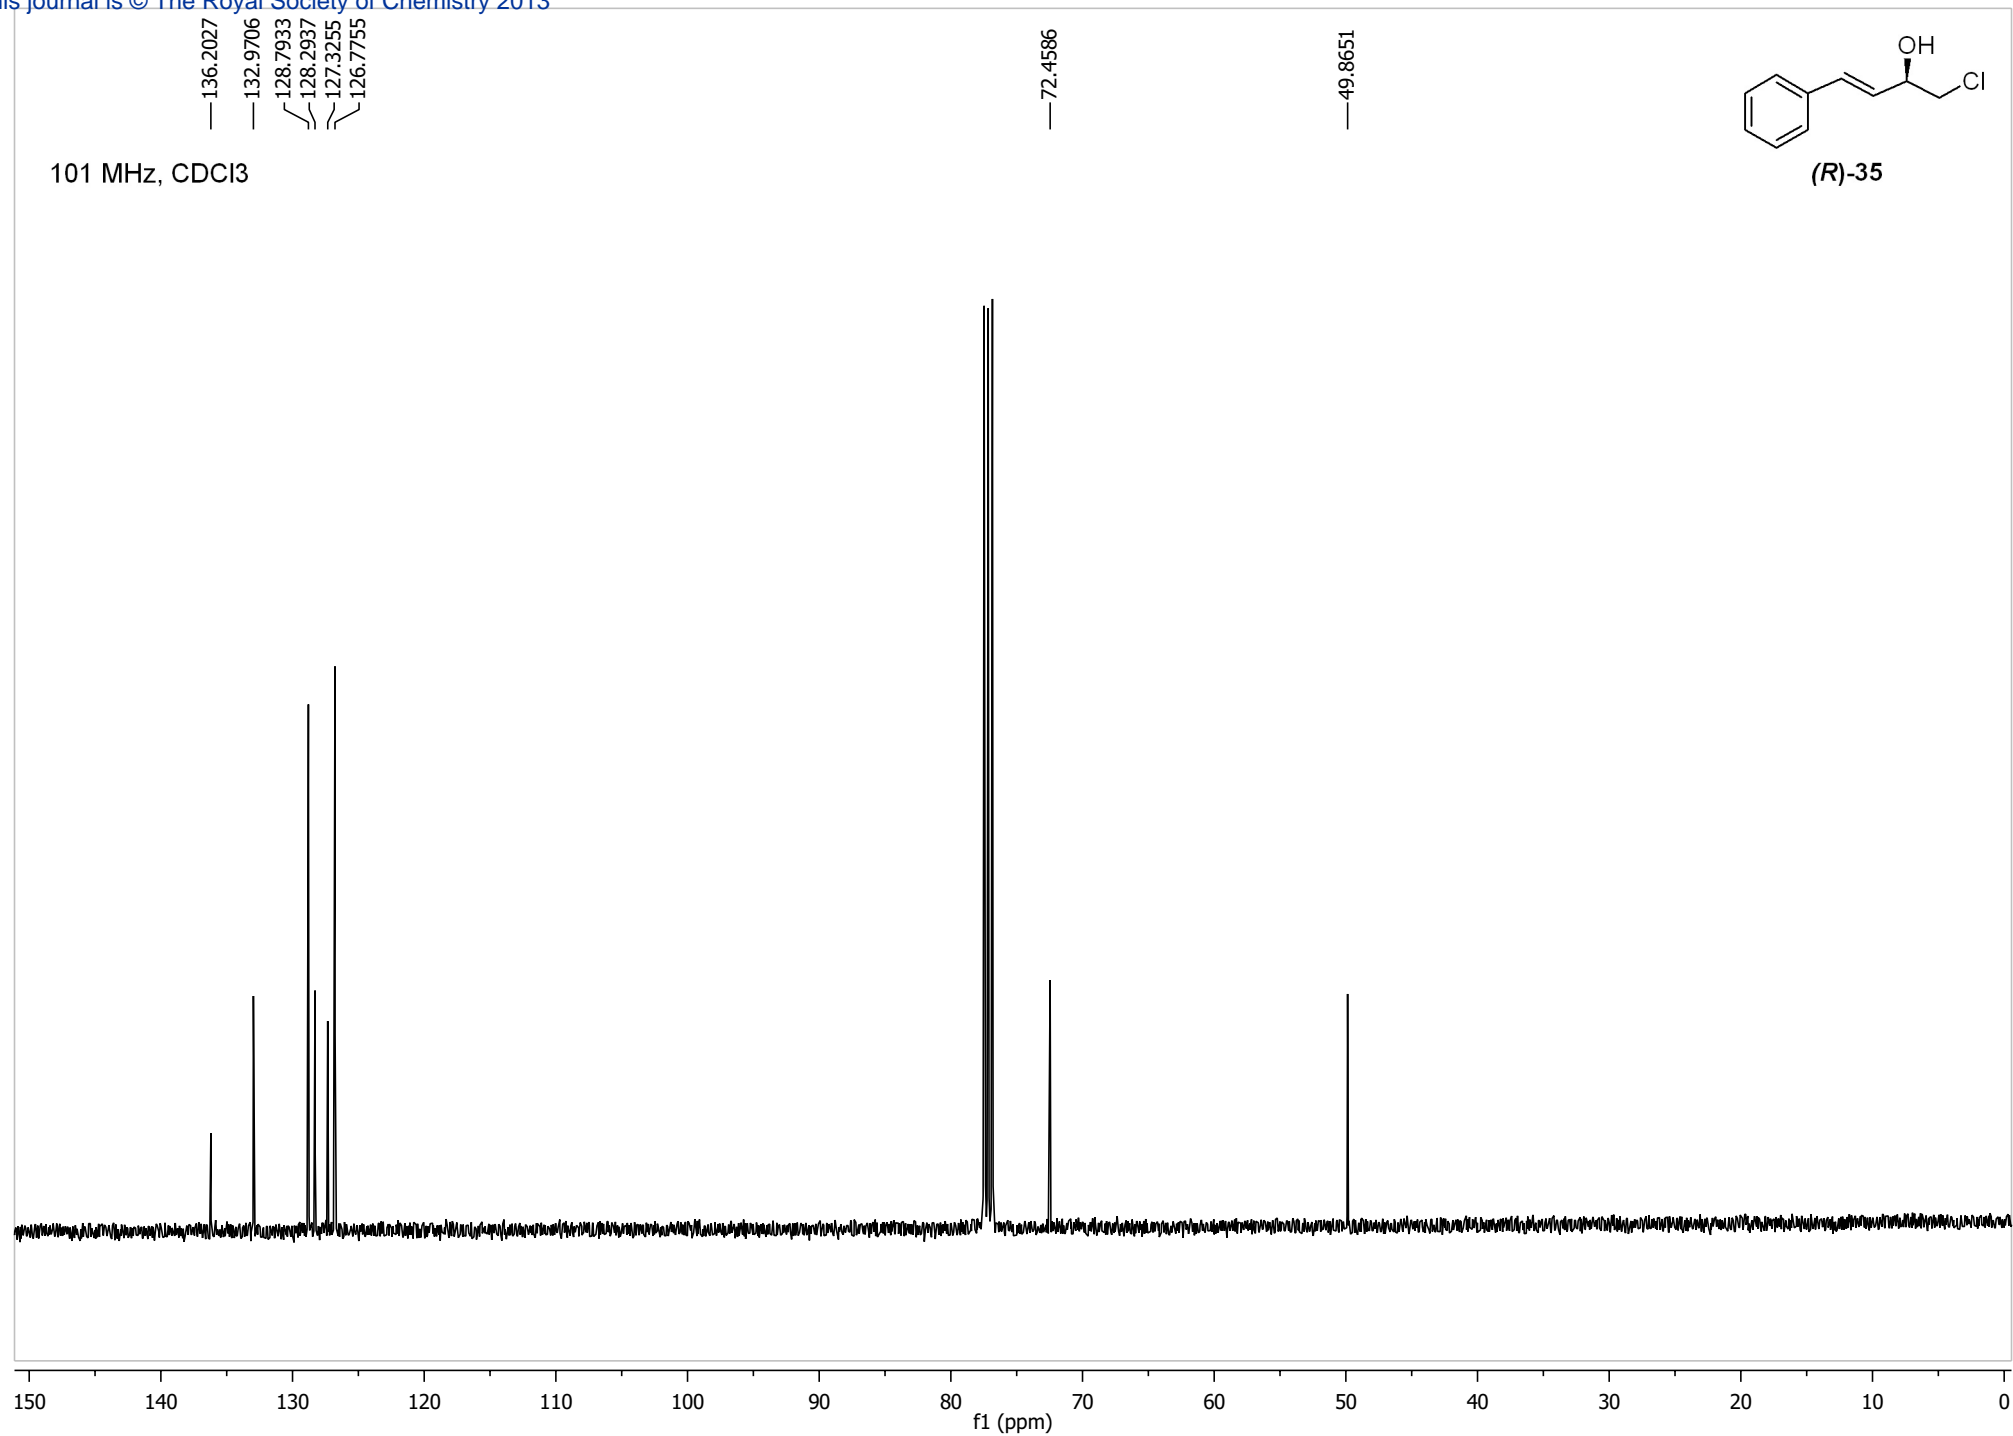

Supplement: c3sc51949j_2.pdf [file c3sc51949j_2.pdf]
